# Supplementary material for: lnCAR: A Comprehensive Resource for lncRNAs from Cancer Arrays
Source: Oxford University Press journal article supplement (doi:10.1158/0008-5472.can-18-2169), 2019-02-20
Supplement: 00085472can182169-sup-205230_3_supp_5304837_ply322.xlsx [file 00085472can182169-sup-205230_3_supp_5304837_ply322.xlsx]

## Sheet: Table S7
Table S7 Literature validation of Top10 pan-cancer differentially expressed lncRNAs
Gene	Cancer	Expression Pattern	PMID	Method
SNHG17	Colorectal cancer	up-regulated	28933484	Microarray analysis and qRT-PCR
	Breast cancer	up-regulated	25307233	Microarray analysis
DUXAP8	Non-small cell lung cancer	up-regulated	28131418	Microarray and RNA-Seq analysis, qRT-PCR
	Gastric cancer	up-regulated	28881724	Microarray analysis and qRT-PCR
ADAMTS9-AS2	Non-small cell lung cancer	down-regulated	26481356	qRT-PCR
	Glioma	down-regulated	24833086	qRT-PCR
PGM5-AS1	Luminal subtype breast cancer	down-regulated	27895496	RNA-Seq analysis
	Non-small cell lung cancer	down-regulated	25590602	Microarray analysis and qRT-PCR
	Gastric cancer	down-regulated	28841672	RNA-Seq analysis
HAND2-AS1	Endometrioid carcinoma	down-regulated	29107108	RNA-Seq analysis and qRT-PCR
	Hepatocellular Carcinoma	down-regulated	26492393	RNA-Seq analysis
	Hepatocellular Carcinoma	down-regulated	28194035	RNA-Seq analysis, RNAi and qRT-PCR
ZNF667-AS1	Cervical cancer	down-regulated	29243775	Microarray analysis and qRT-PCR
	Breast cancer	down-regulated	26646903	Microarray analysis and qRT-PCR
FGF14-AS2	Breast cancer	down-regulated	26820525	RNA-Seq analysis and qRT-PCR
	Bladder cancer	down-regulated	28389669	RNA-Seq analysis
	Prostate cancer
	Lung adenocarcinoma
	ER+ breast cancer
PWAR6	Breast cancer	down-regulated	Chari et al., Bioinformatics (MSc), 2017	RNA-Seq analysis
MIR22HG	Hepatocellular Carcinoma	down-regulated	29371967	qRT-PCR
	Hepatocellular Carcinoma	down-regulated	26492393	RNA-Seq analysis
