# Supplementary material for: lnCAR: A Comprehensive Resource for lncRNAs from Cancer Arrays
Source: Oxford University Press journal article supplement (doi:10.1158/0008-5472.can-18-2169), 2019-02-20
Supplement: 00085472can182169-sup-205230_3_supp_5304838_ply323.xlsx [file 00085472can182169-sup-205230_3_supp_5304838_ply323.xlsx]

## Sheet: Table S6
Table S6 Cancer-associated lncRNAs suported by low-throughput experiments
Gene name	Cancer subtype	Method	Sample Or Cell line	Conditions information	Expression pattern	PMID	Source
AATBC	Bladder cancer	qPCR; RNAi; Microarray	bladder cancer tissue	Tumor vs Normal	up-regulated	25473900	Lnc2Cancer; LncRNADisease
BLACAT1	Bladder cancer	ISH; qPCR; RNAi; Microarray	bladder cancer tissue; J82, UMUC-3, HT-1376, T24, 5637 cell line	Tumor vs Normal	up-regulated	23688781	Lnc2Cancer
C5orf66-AS1	Bladder cancer	qPCR; RNAi; Microarray	bladder cancer tissue	Tumor vs Normal	down-regulated	24944692	Lnc2Cancer
CADM3-AS1	Bladder cancer	qPCR; RNAi; Microarray	bladder cancer tissue	Tumor vs Normal	down-regulated	24944692	Lnc2Cancer
CDKN2B-AS1	Bladder cancer	PCR; Microarray	bladder cancer tissue	Tumor vs Normal	up-regulated	26449463	Lnc2Cancer
GAS5	Bladder cancer	qPCR; RIP; RNAi; Western blot	bladder cancer tissue; T24, DSH1, RT112, RT4, KU7, 253J cell line	Tumor vs Normal	down-regulated	24069260	Lnc2Cancer; LncRNADisease
GHET1	Bladder cancer	qPCR; RNAi; Western blot	bladder cancer tissue	Tumor vs Normal	up-regulated	25400817	Lnc2Cancer; LncRNADisease
HAGLR	Bladder cancer	qPCR; RNAi	bladder cancer tissue; 5637, T24 cell line	Tumor vs Normal	up-regulated	27328915	Lnc2Cancer
HIF1A-AS2	Bladder cancer	qPCR	bladder cancer tissue	High stage vs Low stage	up-regulated	27018306	Lnc2Cancer; LncRNADisease
HIF1A-AS2	Bladder cancer	qPCR	bladder cancer tissue	High grade vs Low grade	up-regulated	27018306	Lnc2Cancer; LncRNADisease
HIF1A-AS2	Bladder cancer	qPCR	bladder cancer tissue	Tumor vs Normal	up-regulated	27018306	Lnc2Cancer; LncRNADisease
HOTAIR	Bladder cancer	Northern blot; qPCR; Western blot	bladder cancer tissue; T24, J82, BIU-87 cell line	Tumor vs Normal	up-regulated	25030736	Lnc2Cancer; LncRNADisease
MALAT1	Bladder cancer	Luciferase reporter assay; qPCR; RIP; RNAi; Western blot	bladder cancer tissue; T24 cell line	Tumor vs Normal	up-regulated	22722759	Lnc2Cancer; LncRNADisease
MDC1-AS1	Bladder cancer	qPCR; Microarray	bladder cancer tissue	Tumor vs Normal	down-regulated	25514464	Lnc2Cancer
MEG3	Bladder cancer	CHIP; FCM	bladder cancer tissue	Tumor vs Normal	down-regulated	14602737	Lnc2Cancer; LncRNADisease
MEG3	Bladder cancer	ISH; qPCR	bladder cancer tissue; T24 cell line	Tumor vs Normal	down-regulated	23295831	Lnc2Cancer
PANDAR	Bladder cancer	FCM; qPCR; RNAi	bladder cancer tissue; 5637, SW780, UMUC3, T24, SV-HUC-1 cell line	High stage vs Low stage	up-regulated	27206339	Lnc2Cancer; LncRNADisease
PANDAR	Bladder cancer	FCM; qPCR; RNAi	bladder cancer tissue; 5637, SW780, UMUC3, T24, SV-HUC-1 cell line	High grade vs Low grade	up-regulated	27206339	Lnc2Cancer; LncRNADisease
PANDAR	Bladder cancer	FCM; qPCR; RNAi	bladder cancer tissue; 5637, SW780, UMUC3, T24, SV-HUC-1 cell line	Tumor vs Normal	up-regulated	27206339	Lnc2Cancer; LncRNADisease
PCAT1	Bladder cancer	qPCR	bladder cancer tissue; T24, 5637 cell line	Tumor vs Normal	up-regulated	25934337	Lnc2Cancer
PVT1	Bladder cancer	FCM; qPCR; RNAi	bladder cancer tissue; T24, 5637 cell line	Tumor vs Normal	up-regulated	26517688	Lnc2Cancer; LncRNADisease
SCHLAP1	Bladder cancer	FCM; qPCR; RNAi	T24, 5637 cell line	Tumor vs Normal	up-regulated	26861061	Lnc2Cancer
SNHG16	Bladder cancer	qPCR	bladder cancer tissue; RT4, T24, J82 cell line	Tumor vs Normal	up-regulated	21147498	Lnc2Cancer
SPRY4-IT1	Bladder cancer	qPCR; RNAi	bladder cancer tissue; J82, T24, SW780, SV-40 cell line	Tumor vs Normal	up-regulated	25973088	Lnc2Cancer; LncRNADisease
TUG1	Bladder cancer	ELISA	bladder cancer tissue; SV-HUC-1 cell line	High stage vs Low stage	up-regulated	26318860	Lnc2Cancer; LncRNADisease
UCA1	Bladder cancer	qPCR; RIP; RNAi; Western blot	bladder cancer tissue	Tumor vs Normal	up-regulated	16914571	Lnc2Cancer; LncRNADisease
UCA1	Bladder cancer	qPCR; RIP; RNAi; Western blot	BLS-211, BLX-211, BLZ-211 cell line	Tumor vs Normal	up-regulated	20117985	Lnc2Cancer; LncRNADisease
UCA1	Bladder cancer	qPCR; RIP; RNAi; Western blot	urine	Tumor vs Normal	up-regulated	26138586	Lnc2Cancer; LncRNADisease
UCA1	Bladder cancer	qPCR; RIP; RNAi; Western blot	urine	Tumor vs Normal	up-regulated	26161701	Lnc2Cancer; LncRNADisease
UCA1	Bladder cancer	qPCR; RIP; RNAi; Western blot	bladder cancer tissue; UMUC2, 5637 cell line	Tumor vs Normal	up-regulated	26373319	Lnc2Cancer; LncRNADisease
MALAT1	Urothelial carcinoma	qPCR; RNAi	T24, 5737 cell line	High grade vs Low grade	up-regulated	23153939	Lnc2Cancer
MALAT1	Urothelial carcinoma	qPCR; RNAi	T24, 5737 cell line	Tumor vs Normal	up-regulated	23153939	Lnc2Cancer
TUG1	Urothelial carcinoma	qPCR; RNAi	T24, 5637 cell line	High grade vs Low grade	up-regulated	22961206	Lnc2Cancer
TUG1	Urothelial carcinoma	qPCR; RNAi	T24, 5637 cell line	Tumor vs Normal	up-regulated	22961206	Lnc2Cancer
BCYRN1	Breast cancer	ChIP; qPCR	breast cancer tissue	Tumor vs Normal	up-regulated	9422992	Lnc2Cancer; LncRNADisease
BCYRN1	Breast cancer	ChIP; qPCR	breast cancer cell line	Tumor vs Normal	down-regulated	18006640	MNDR
BCYRN1	Breast cancer	ChIP; qPCR	MCF-7, T47D, MDA-MB-231 cell line	ER Positive vs ER Negative	up-regulated	27277684	Lnc2Cancer
CCAT1	Breast cancer	qPCR	breast cancer tissue	Tumor vs Normal	up-regulated	26464701	Lnc2Cancer; LncRNADisease
CLDND1	Breast cancer	qPCR; Western blot	MDA-MB-231, MCF-7, Hela, PL45, SW480, U251, A549, HepG2 cell line	Tumor vs Normal	up-regulated	27053956	Lnc2Cancer; LncRNADisease
EGOT	Breast cancer	qPCR	breast cancer tissue	Tumor vs Normal	down-regulated	26159853	Lnc2Cancer; LncRNADisease
EPB41L4A-AS2	Breast cancer	FCM; qPCR	MDA-MB-231, A549, 786-O cell line	Tumor vs Normal	down-regulated	26980733	Lnc2Cancer; LncRNADisease
FOXCUT	Breast cancer	qPCR; RNAi	MDA-MB-231, MDA-MB-468 cell line	Tumor vs Normal	up-regulated	25516208	Lnc2Cancer; LncRNADisease
GAS5	Breast cancer	qPCR; Microarray	breast cancer tissue; SKBR-3 cell line	Tumor vs Normal	down-regulated	27034004	Lnc2Cancer; LncRNADisease
H19	Breast cancer	ISH	breast cancer cell line	Tumor vs Normal	up-regulated	9811352	MNDR
H19	Breast cancer	ChIP	breast cancer tissue; MCF-7, MDA-MB-231 cell line	ER Positive vs ER Negative	up-regulated	25846769	Lnc2Cancer
H19	Breast cancer	ChIP	breast cancer tissue	Tumor vs Normal	up-regulated	26323944	Lnc2Cancer; LncRNADisease
IRAIN	Breast cancer	qPCR	breast cancer tissue	Tumor vs Normal	down-regulated	25465188	Lnc2Cancer; LncRNADisease
ITGB1	Breast cancer	FCM; qPCR; RNAi; Western blot	breast cancer tissue; MDA-MB-231, MCF-7, T47D, ZR-75-30, 1590 cell line	Tumor vs Normal	up-regulated	26601916	Lnc2Cancer; LncRNADisease
KCNK15-AS1	Breast cancer	qPCR	breast cancer tissue	Tumor vs Normal	up-regulated	25929808	Lnc2Cancer; LncRNADisease
KCNQ1OT1	Breast cancer	ChIP; qPCR	breast cancer cell line	E2 treatment vs Control	down-regulated	21304052	MNDR
LINC00901	Breast cancer	qPCR	breast cancer tissue; ZR-75-30, MCF-7, SKBR-3, T47D cell line	Tumor vs Normal	down-regulated	25435812	Lnc2Cancer; LncRNADisease
LINC-ROR	Breast cancer	qPCR; Western blot; Microarray	breast cancer tissue	Tumor vs Normal	up-regulated	24922071	Lnc2Cancer
LINC-ROR	Breast cancer	qPCR; Western blot; Microarray	breast cancer tissue; HEK293T, MCF-7, HS578T, MDA-MB-231 cell line	Tumor vs Normal	up-regulated	25253741	Lnc2Cancer
LSINCT5	Breast cancer	Immunoblot	HMEC, MCF-7, MDA157 cell line	Tumor vs Normal	up-regulated	21532345	Lnc2Cancer; LncRNADisease
MEG3	Breast cancer	ISH; qPCR	breast tissue	Tumor vs Normal	down-regulated	14602737	Lnc2Cancer; LncRNADisease
MEG3	Breast cancer	CHIP; FCM	breast cancer cell line	Tumor vs Normal	down-regulated	22393162	MNDR; LncRNADisease
MEG3	Breast cancer	CHIP; FCM	breast cancer tissue	Tumor vs Normal	down-regulated	27166155	Lnc2Cancer; LncRNADisease
NEAT1	Breast cancer	ISH; qPCR	breast cancer cell line	Tumor vs Normal	up-regulated	21532345	MNDR
PANDAR	Breast cancer	Luciferase reporter assay; qPCR; RIP; Western blot	BT474, SK-BR3, MCF-7, T47D, MDA-MB-231 cell line	Tumor vs Normal	up-regulated	26927017	Lnc2Cancer; LncRNADisease
PVT1	Breast cancer	qPCR; Genotyping	BRF71T1, HCC38, CAMA-1 cell line	Tumor vs Normal	up-regulated	24780616	LincSNP; Lnc2Cancer; LncRNADisease
SPRY4-IT1	Breast cancer	qPCR; RNAi; Western blot; Microarray	breast cancer tissue; MD-MB-231, MD-MB-435S, MCF-10A, MCF-7 cell line	Tumor vs Normal	up-regulated	25742952	Lnc2Cancer; LncRNADisease
TP73-AS1	Breast cancer	Luciferase reporter assay; qPCR	Hs578Bst, BT474, MDA-MB-231, T47D, MCF-7, MDA-MB-453 cell line	Tumor vs Normal	down-regulated	28639399	MNDR
TUNAR	Breast cancer	Luciferase reporter assay; qPCR; RNA Pull-Down Assay; RPI; Western blot	breast cancer tissue; MCF-7, T47D, BT474, MDA-MB-468 cell line	Tumor vs Normal	up-regulated	26207516	Lnc2Cancer
UCA1	Breast cancer	IF; RT-PCR	breast cancer cell line	Tumor vs Normal	down-regulated	16914571	MNDR
UCA1	Breast cancer	IF; RT-PCR	MCF-7, MDA-MB-231, HCT-116 p53-WT, HCT-116 cell line	Tumor vs Normal	up-regulated	24457952	Lnc2Cancer
UCA1	Breast cancer	IF; RT-PCR	breast cancer tissue; MDA-MB-231 cell line	Tumor vs Normal	up-regulated	26439035	Lnc2Cancer; LncRNADisease
XIST	Breast cancer	FISH; Microarray	breast cancer cell line	Tumor vs Normal	down-regulated	18006640	MNDR
XIST	Breast cancer	FISH; Microarray	M10, MCF10A, MCF-7 cell line	Tumor vs Normal	down-regulated	27248326	Lnc2Cancer; LncRNADisease
ZFAS1	Breast cancer	ISH; Northern blot; Microarray	breast cancer tissue	Tumor vs Normal	down-regulated	21460236	Lnc2Cancer; LncRNADisease
NKILA	Ductal carcinoma in situ	qPCR; RIP; RNAi	breast cancer tissue	Tumor vs Normal	down-regulated	25759022	Lnc2Cancer; LncRNADisease
BCYRN1	Invasive breast cancer	ChIP; qPCR	breast cancer tissue	Tumor vs Normal	up-regulated	15240511	Lnc2Cancer; LncRNADisease
KCNQ1OT1	Invasive breast cancer	ChIP; qPCR	breast cancer tissue	Tumor vs Normal	up-regulated	26323944	Lnc2Cancer; LncRNADisease
NKILA	Invasive ductal carcinoma	qPCR; RIP; RNAi	breast cancer tissue	Metastasis vs Primary	down-regulated	25759022	Lnc2Cancer; LncRNADisease
HOTAIR	Triple-negative breast cancer	qPCR; Microarray	triple-negative breast cancer tissue	Tumor vs Normal	up-regulated	25996380	Lnc2Cancer
LINC01096	Triple-negative breast cancer	qPCR; Microarray	triple-negative breast cancer tissue	Tumor vs Normal	down-regulated	26078338	Lnc2Cancer
MALAT1	Triple-negative breast cancer	qPCR; Microarray	triple-negative breast cancer tissue	Tumor vs Normal	up-regulated	25996380	Lnc2Cancer
PCAT6	Triple-negative breast cancer	qPCR; Microarray	triple-negative breast cancer tissue	Tumor vs Normal	up-regulated	25996380	Lnc2Cancer
BCYRN1	Cervical cancer	ISH; Northern hybridization	cervical cancer tissue	Tumor vs Normal	up-regulated	9422992	Lnc2Cancer; LncRNADisease
CCEPR	Cervical cancer	qPCR; RNAi; RNA pull-down assay; Western blot	cervical cancer tissue; HeLa, SiHa cell line	Tumor vs Normal	up-regulated	25921283	Lnc2Cancer
CDKN2B-AS1	Cervical cancer	qPCR	HeLa cell line	Tumor vs Normal	up-regulated	26408699	Lnc2Cancer
GAS5	Cervical cancer	qPCR	cervical cancer tissue	Tumor vs Normal	down-regulated	25400758	Lnc2Cancer; LncRNADisease
HOTAIR	Cervical cancer	qPCR; RIP; Microarray	blood(serum)	Tumor vs Normal	up-regulated	25366139	Lnc2Cancer; LncRNADisease
HOTAIR	Cervical cancer	qPCR; RIP; Microarray	cervical cancer tissue; SiHa, HeLa, Caski cell line	Tumor vs Normal	up-regulated	25405331	Lnc2Cancer; LncRNADisease
HOTAIR	Cervical cancer	qPCR; RIP; Microarray	blood; SiHa, Caski cell line	Tumor vs Normal	up-regulated	27323817	Lnc2Cancer; LncRNADisease
MALAT1	Cervical cancer	Dual Luciferase Assay; qPCR; RNAi; Western blot	CaSki cell line	Tumor vs Normal	up-regulated	21266177	MNDR
MALAT1	Cervical cancer	Dual Luciferase Assay; qPCR; RNAi; Western blot	CaSki cell line	Tumor vs Normal	up-regulated	22664915	MNDR
MALAT1	Cervical cancer	Dual Luciferase Assay; qPCR; RNAi; Western blot	cervical cancer tissue; HeLa, CaSki, SiHa, HCC94 cell line	Tumor vs Normal	up-regulated	24932303	Lnc2Cancer; LncRNADisease
MALAT1	Cervical cancer	Dual Luciferase Assay; qPCR; RNAi; Western blot	cervical cancer tissue; HeLa, CaSki, SiHa cell line	Tumor vs Normal	up-regulated	26242259	Lnc2Cancer; LncRNADisease
MALAT1	Cervical cancer	Dual Luciferase Assay; qPCR; RNAi; Western blot	cervical cancer tissue; HeLa, CaSki cell line	Tumor vs Normal	up-regulated	26400521	Lnc2Cancer; LncRNADisease
MEG3	Cervical cancer	ISH; qPCR	cervical cancer tissue	Tumor vs Normal	down-regulated	14602737	Lnc2Cancer
MEG3	Cervical cancer	ISH; qPCR	cervical cancer tissue; HeLa, C-33A, HCC94 cell line	Tumor vs Normal	down-regulated	23790166	Lnc2Cancer; LncRNADisease
MEG3	Cervical cancer	ISH; qPCR	cervical cancer tissue; HeLa, CaSki cell line	Tumor vs Normal	down-regulated	26574780	Lnc2Cancer; LncRNADisease
NPTN-IT1	Cervical cancer	qPCR	cervical cancer tissue	Tumor vs Normal	down-regulated	25755778	Lnc2Cancer
PVT1	Cervical cancer	qPCR; RNAi; Western blot	SiHa, HeLa, DoTc2 4510 cell line	Tumor vs Normal	up-regulated	27232880	Lnc2Cancer; LncRNADisease
PVT1	Cervical cancer	qPCR; RNAi; Western blot	cervical cancer tissue; SiHa, HeLa cell line	Tumor vs Normal	up-regulated	27272214	Lnc2Cancer; LncRNADisease
TUSC8	Cervical cancer	qPCR; RNAi; Western blot	cervical cancer tissue; HeLa, SiHa, HCC94 cell line	Tumor vs Normal	down-regulated	24667250	Lnc2Cancer
AC022075.3	Colorectal cancer	qPCR; Microarray	HCT116 cell line	5-Fluorouracil treatment vs Control	down-regulated	25921151	Lnc2Cancer
AFAP1-AS1	Colorectal cancer	qPCR; RNAi	colorectal cancer tissue; HCT116, SW480 cell line	High stage vs Low stage	up-regulated	27261589	Lnc2Cancer; LncRNADisease
AFAP1-AS1	Colorectal cancer	qPCR; RNAi	colorectal cancer tissue; HCT116, SW480 cell line	Tumor vs Normal	up-regulated	27261589	Lnc2Cancer; LncRNADisease
BANCR	Colorectal cancer	qPCR; RNAi; Western blot	colorectal cancer tissue	Tumor vs Normal	up-regulated	25013510	Lnc2Cancer; LncRNADisease
BANCR	Colorectal cancer	qPCR; RNAi; Western blot	colorectal cancer tissue; SW480, HCT116, RQO, HT-29 cell line	Tumor vs Normal	down-regulated	25928067	Lnc2Cancer; LncRNADisease
CASC2	Colorectal cancer	FCM; qPCR	colorectal cancer tissue; CACO2, SW480, SW620, HCT-116, HT-29 cell line	High stage vs Low stage	down-regulated	27198161	Lnc2Cancer; LncRNADisease
CASC2	Colorectal cancer	FCM; qPCR	colorectal cancer tissue; CACO2, SW480, SW620, HCT-116, HT-29 cell line	Tumor vs Normal	down-regulated	27198161	Lnc2Cancer; LncRNADisease
CCAT1	Colorectal cancer	ISH; qPCR	colorectal cancer tissue	Tumor vs Normal	up-regulated	26064266	Lnc2Cancer; LncRNADisease
CCAT1	Colorectal cancer	ISH; qPCR	colorectal cancer tissue	Tumor vs Normal	up-regulated	26823726	Lnc2Cancer; LncRNADisease
CCAT2	Colorectal cancer	qPCR; RIP	colorectal cancer tissue; COLO320DM, HCT116, RKO, HEK293 cell line	Tumor vs Normal	up-regulated	23796952	Lnc2Cancer
CDKN2B-AS1	Colorectal cancer	Northern blot; qPCR; RNAi; Western blot	HT-29, SW480, HCT116, LoVo cell line	Tumor vs Normal	up-regulated	27286457	Lnc2Cancer
CDKN2B-AS1	Colorectal cancer	Northern blot; qPCR; RNAi; Western blot	colorectal cancer tissue; HT-29, RKO cell line	Tumor vs Normal	up-regulated	27314206	Lnc2Cancer
CRNDE	Colorectal cancer	qPCR; RNAi; Microarray	colorectal cancer tissue	Tumor vs Normal	up-regulated	22393467	Lnc2Cancer; LncRNADisease
CRNDE	Colorectal cancer	qPCR; RNAi; Microarray	colorectal cancer tissue	Metastasis vs Primary	up-regulated	27042112	Lnc2Cancer; LncRNADisease
DANCR	Colorectal cancer	qPCR	colorectal cancer tissue	Tumor vs Normal	up-regulated	26617879	Lnc2Cancer; LncRNADisease
DLGAP4-AS1	Colorectal cancer	Luciferase reporter assay; qPCR; Microarray	colorectal cancer tissue; HCT116, RKO, HT-29, SW620 cell line	Tumor vs Normal	down-regulated	25663692	Lnc2Cancer
EHHADH-AS1	Colorectal cancer	qPCR; Microarray	HCT116 cell line	5-Fluorouracil treatment vs Control	down-regulated	25921151	Lnc2Cancer
ELFN1-AS1	Colorectal cancer	qPCR; Luciferase reporter assay	colorectal cancer tissue; HCT116,RKO,HT-29,SW620 etc. cell line	Tumor vs Normal	up-regulated	25663692	Lnc2Cancer
FTX	Colorectal cancer	qPCR; RNAi	colorectal cancer tissue; HT-29, SW1116, SW480, COLO205 cell line	Tumor vs Normal	up-regulated	26629053	Lnc2Cancer; LncRNADisease
GAS2L3	Colorectal cancer	qPCR; RNAi	HCT116, SW1116 cell line	Tumor vs Normal	down-regulated	24809982	Lnc2Cancer
GAS5	Colorectal cancer	FCA; qPCR	colorectal cancer tissue	High stage vs Low stage	down-regulated	25326054	Lnc2Cancer; LncRNADisease
GHET1	Colorectal cancer	qPCR; Western blot	colorectal cancer tissue; Lovo, HCoEpiC, HCT-116, Caco-2 cell line	Tumor vs Normal	up-regulated	27131316	Lnc2Cancer; LncRNADisease
H19	Colorectal cancer	FCM; qRCR; RIP; Western blot	colorectal cell line	Tumor vs Normal	up-regulated	8564957	MNDR
H19	Colorectal cancer	ISH; Luciferase assay	colorectal cancer tissue	Tumor vs Normal	up-regulated	19926638	Lnc2Cancer; LncRNADisease
H19	Colorectal cancer	qPCR; RNAi	colorectal cancer tissue; HCT8,HT-29,HCT116,SW620 etc. cell line	Metastasis vs Primary	up-regulated	25058480	Lnc2Cancer
H19	Colorectal cancer	qPCR; RNAi	colorectal cancer tissue; HCT8,HT-29,HCT116,SW620 etc. cell line	Tumor vs Normal	up-regulated	25058480	Lnc2Cancer
H19	Colorectal cancer	FCM; qRCR; RIP; Western blot	colorectal cancer tissue; SW620, HCT-116 cell line	Tumor vs Normal	up-regulated	26068968	Lnc2Cancer; LncRNADisease
H19	Colorectal cancer	FCM; qRCR; RIP; Western blot	HCT116, HT-29, Lovo, SW480, CCD-18Co cell line	High stage vs Low stage	up-regulated	26989025	Lnc2Cancer; LncRNADisease
HOTAIRM1	Colorectal cancer	qPCR; Microarray	colorectal cancer tissue; SW480, HT-29, RKO, Lovo cell line	Tumor vs Normal	down-regulated	27307307	Lnc2Cancer; LncRNADisease
HOTTIP	Colorectal cancer	qPCR	colorectal cancer tissue	Tumor vs Normal	up-regulated	26617875	Lnc2Cancer; LncRNADisease
LINC00964	Colorectal cancer	qPCR	colorectal cancer tissue	Tumor vs Normal	down-regulated	25740697	Lnc2Cancer
LINC01057	Colorectal cancer	qPCR	blood (plasma)	Tumor vs Normal	up-regulated	26328256	Lnc2Cancer
LINC01507	Colorectal cancer	qPCR; Microarray	colorectal cancer tissue	Tumor vs Normal	up-regulated	26328256	Lnc2Cancer
LINC01618	Colorectal cancer	qPCR	blood (plasma)	Tumor vs Normal	up-regulated	26328256	Lnc2Cancer
LINC01630	Colorectal cancer	qPCR	colorectal cancer tissue	Tumor vs Normal	down-regulated	26429648	Lnc2Cancer
LINC01630	Colorectal cancer	qRT-PCR	colorectal cancer tissue	Tumor vs Normal	down-regulated	27062707	EVLncRNAs
LINC02086	Colorectal cancer	qPCR; Microarray	HCT116 cell line	5-Fluorouracil treatment vs Control	down-regulated	25921151	Lnc2Cancer
LINC02446	Colorectal cancer	qPCR; Microarray	HCT116 cell line	5-Fluorouracil treatment vs Control	down-regulated	25921151	Lnc2Cancer
LINC-PINT	Colorectal cancer	qPCR; RIP; Microarray	KrasLA2/+, Trp53LSL/LSL, Rosa26-CreERT2 cell line	Tumor vs Normal	down-regulated	24070194	Lnc2Cancer
LINC-ROR	Colorectal cancer	qPCR; RNAi; Western blot	HT-29, HRT-18 cell line	Tumor vs Normal	up-regulated	26169368	Lnc2Cancer
LOC101927550	Colorectal cancer	qPCR; Microarray	HCT116 cell line	5-Fluorouracil treatment vs Control	down-regulated	25921151	Lnc2Cancer
LSINCT5	Colorectal cancer	qPCR	colorectal cancer tissue; LoVo, Caco-2, DLD1, HCT-8, HCT-116 cell line	Tumor vs Normal	up-regulated	25526476	Lnc2Cancer
MALAT1	Colorectal cancer	qPCR; RIP	colorectal cancer tissue; LoVo cell line	Metastasis vs Primary	up-regulated	24244343	Lnc2Cancer; LncRNADisease
MALAT1	Colorectal cancer	qPCR; RIP	colorectal cancer tissue; LoVo cell line	Tumor vs Normal	up-regulated	24244343	Lnc2Cancer; LncRNADisease
MALAT1	Colorectal cancer	qPCR; RIP	colorectal cancer tissue	Tumor vs Normal	up-regulated	25031737	Lnc2Cancer; LncRNADisease
MALAT1	Colorectal cancer	qPCR; RIP	colorectal cancer tissue; HCT116, SW480, SW620, LoVo, CaCo-2 cell line	Tumor vs Normal	up-regulated	25446987	Lnc2Cancer; LncRNADisease
MEG3	Colorectal cancer	FCA; qPCR; Western blot	colorectal cancer tissue	High stage vs Low stage	down-regulated	25636452	Lnc2Cancer; LncRNADisease
MIR31HG	Colorectal cancer	qPCR; Western blot; RNAi; IHC; Luciferase reporter assay	colorectal cancer tissue; HCT116, DLD1, SW480, RKO, HT-29 cell line	High stage vs Low stage	down-regulated	26362196	Lnc2Cancer
MIR31HG	Colorectal cancer	qPCR; Western blot; RNAi; IHC; Luciferase reporter assay	colorectal cancer tissue; HCT116, DLD1, SW480, RKO, HT-29 cell line	Tumor vs Normal	down-regulated	26362196	Lnc2Cancer
MNX1-AS1	Colorectal cancer	Luciferase reporter assay; qPCR; Microarray	colorectal cancer tissue; HCT116, RKO, HT-29, SW620 cell line	Tumor vs Normal	up-regulated	25663692	Lnc2Cancer
NCRUPAR	Colorectal cancer	IHC; qPCR	colorectal cancer tissue	Tumor vs Normal	down-regulated	25119598	Lnc2Cancer
NEAT1	Colorectal cancer	qPCR	colorectal cancer tissue	Tumor vs Normal	up-regulated	26314847	Lnc2Cancer; LncRNADisease
NPTN-IT1	Colorectal cancer	qPCR; RIP; Western blot	colorectal cancer tissue; QSG-7701, LO2, SMMC-7721 cell line	Tumor vs Normal	down-regulated	23395002	Lnc2Cancer
PCAT1	Colorectal cancer	qPCR	colorectal cancer tissue	Tumor vs Normal	up-regulated	23640607	Lnc2Cancer
PRNCR1	Colorectal cancer	FCM; qPCR	colorectal cancer tissue; SW620, HCT116, SW480, LoVo, HT-29 cell line	Tumor vs Normal	up-regulated	26530130	Lnc2Cancer; LncRNADisease
PVT1	Colorectal cancer	qPCR; Microarray	HT-29, HCT-116 cell line	Tumor vs Normal	up-regulated	26990997	Lnc2Cancer
RPL34-AS1	Colorectal cancer	qPCR; Microarray	colorectal cancer tissue	Metastasis vs Primary	down-regulated	24908062	Lnc2Cancer
RPL34-AS1	Colorectal cancer	qPCR; Microarray	colorectal cancer tissue	Tumor vs Normal	down-regulated	24908062	Lnc2Cancer
SNHG16	Colorectal cancer	qPCR; RNAi	colorectal cancer tissue; LoVo, Caco-2, DLD1, SW620, SW480, HCT8, HCT116 cell line	Tumor vs Normal	down-regulated	24519959	Lnc2Cancer
TUG1	Colorectal cancer	qPCR; Western blot	colorectal cancer tissue; SW480, HCT116, HT-29, SW620, LOVO cell line	Tumor vs Normal	up-regulated	26856330	Lnc2Cancer; LncRNADisease
TUSC7	Colorectal cancer	qPCR	colorectal cancer tissue; CaCO-2, HCT8, LoVo, CCC-HIE-2 cell line	Tumor vs Normal	down-regulated	23680400	Lnc2Cancer
UCA1	Colorectal cancer	Luciferase reporter assay; qPCR; RNAi; Microarray	colorectal cancer tissue; CaCO-2, SW480, HCT116, LoVo cell line	Tumor vs Normal	up-regulated	24977734	Lnc2Cancer; LncRNADisease
UCA1	Colorectal cancer	Luciferase reporter assay; qPCR; RNAi; Microarray	colorectal cancer tissue; HCT116, SW480, RKO, HCT8, LoVo cell line	Tumor vs Normal	up-regulated	26238511	Lnc2Cancer; LncRNADisease
UCA1	Colorectal cancer	Luciferase reporter assay; qPCR; RNAi; Microarray	colorectal cancer tissue; HEK-293T, HCT8, HCT116, HT-29, LoVo cell line	Tumor vs Normal	up-regulated	27046651	Lnc2Cancer; LncRNADisease
ZFAS1	Colorectal cancer	Northern blot; qPCR; RIP; RNA pull-down assay; RNAi; Western blot	colorectal cancer tissue; HCT116+/+, HCT116-/-, HT-29, DLD-1, Colo-206, CaCO-2, SW-837, SW-620 cell line	Tumor vs Normal	up-regulated	26506418	Lnc2Cancer; LncRNADisease
CCAT1	Colon cancer	ISH; qPCR	colon cancer tissue	Tumor vs Normal	up-regulated	23594791	Lnc2Cancer
CCAT2	Colon cancer	qPCR	colon cancer tissue	Tumor vs Normal	up-regulated	25185650	Lnc2Cancer
LINC-ROR	Colon cancer	qPCR	colon cancer tissue; NCM460, RKO, Caco2, HCT8, SW480, SW620 cell line	Tumor vs Normal	up-regulated	27071407	Lnc2Cancer
MEG3	Colon cancer	ISH; qPCR	colon cancer tissue	Tumor vs Normal	down-regulated	14602737	Lnc2Cancer; LncRNADisease
UCA1	Colon cancer	IF; RT-PCR	colon cancer cell line	Tumor vs Normal	down-regulated	16914571	MNDR
BCYRN1	Esophageal tumor	ISH; Northern hybridization	esophageal cancer tissue	Tumor vs Normal	up-regulated	9422992	Lnc2Cancer; LncRNADisease
H19	Esophageal tumor	PCR; Microarray	esophageal cancer cell line	Tumor vs Normal	up-regulated	8564957	MNDR
PEG10	Esophageal tumor	qPCR; Western blot	esophageal cancer tissue; EC9706, KYSE150 cell line	Tumor vs Normal	up-regulated	25591808	Lnc2Cancer
AFAP1-AS1	Esophageal adenocarcinoma	qPCR	esophageal adenocarcinoma tissue; OE-33, SK-GT-4, FLO-1, HEEpiC cell line	Tumor vs Normal	up-regulated	23333711	Lnc2Cancer; LncRNADisease
HNF1A-AS1	Esophageal adenocarcinoma	qPCR; RNAi; Western blot; microarray; RNA-seq	esophageal adenocarcinoma tissue; HEEpiC, SKGT-4, OE33 cell line	Tumor vs Normal	up-regulated	24000294	Lnc2Cancer
BCYRN1	Esophageal squamous cell carcinoma	qPCR	esophageal squamous cell carcinoma tissue	Tumor vs Normal	up-regulated	27143917	Lnc2Cancer
CASC9	Esophageal squamous cell carcinoma	qPCR; Microarray	esophageal squamous cell carcinoma tissue	Tumor vs Normal	up-regulated	24222893	Lnc2Cancer
CASC9	Esophageal squamous cell carcinoma	qRT-PCR	esophageal squamous cell carcinoma tissue	Tumor vs Normal	up-regulated	25297587	EVLncRNAs
CASC9	Esophageal squamous cell carcinoma	qRT-PCR; Knockdown	esophageal squamous cell carcinoma tissue	Tumor vs Normal	up-regulated	25885227	EVLncRNAs
CBR3-AS1	Esophageal squamous cell carcinoma	qPCR; RNAi	esophageal squamous cell carcinoma tissue; KYSE30, KYSE70, KYSE140, KYSE150, KYSE180 cell line	High stage vs Low stage	up-regulated	24337686	Lnc2Cancer
CBR3-AS1	Esophageal squamous cell carcinoma	qPCR; RNAi	esophageal squamous cell carcinoma tissue; KYSE30, KYSE70, KYSE140, KYSE150, KYSE180 cell line	Tumor vs Normal	up-regulated	24337686	Lnc2Cancer
CCAT2	Esophageal squamous cell carcinoma	qPCR	esophageal squamous cell carcinoma tissue; KYSE410 cell line	Tumor vs Normal	up-regulated	25677908	Lnc2Cancer; LncRNADisease
CCAT2	Esophageal squamous cell carcinoma	qPCR	esophageal squamous cell carcinoma tissue	High stage vs Low stage	up-regulated	25919911	Lnc2Cancer; LncRNADisease
CCAT2	Esophageal squamous cell carcinoma	qPCR	esophageal squamous cell carcinoma tissue	Tumor vs Normal	up-regulated	25919911	Lnc2Cancer; LncRNADisease
CDKN2B-AS1	Esophageal squamous cell carcinoma	qPCR; RNAi; Western blot	Triple-negative breast cancer tissue	Tumor vs Normal	up-regulated	24747824	Lnc2Cancer; LncRNADisease
FOXCUT	Esophageal squamous cell carcinoma	qPCR; RNAi	esophageal squamous cell carcinoma tissue; KYSE30, KYSE70, KYSE140, KYSE150, KYSE180 cell line	High grade vs Low grade	up-regulated	25031703	Lnc2Cancer; LncRNADisease
FOXCUT	Esophageal squamous cell carcinoma	qPCR; RNAi	esophageal squamous cell carcinoma tissue; KYSE30, KYSE70, KYSE140, KYSE150, KYSE180 cell line	Tumor vs Normal	up-regulated	25031703	Lnc2Cancer; LncRNADisease
HOTAIR	Esophageal squamous cell carcinoma	Luciferase reporter assay; qPCR; Genotyping	esophageal squamous cell carcinoma tissue; TE1, TE3, TE7, TE8, KYSE30, KYSE180 cell line	Tumor vs Normal	up-regulated	24022190	Lnc2Cancer
HOTAIR	Esophageal squamous cell carcinoma	Luciferase reporter assay; qPCR; Genotyping	esophageal squamous cell carcinoma tissue; KYSE30, KYSE140, KYSE180, KYSE410, KYSE510 cell line	Tumor vs Normal	up-regulated	24118380	Lnc2Cancer; LncRNADisease
HOTAIR	Esophageal squamous cell carcinoma	Luciferase reporter assay; qPCR; Genotyping	esophageal squamous cell carcinoma tissue; KYSE30, KYSE150, KYSE450, KYSE510, KYSE180 cell line	Tumor vs Normal	up-regulated	24151120	Lnc2Cancer; LncRNADisease
HOTAIR	Esophageal squamous cell carcinoma	Luciferase reporter assay; qPCR; Genotyping	esophageal squamous cell carcinoma tissue	Tumor vs Normal	up-regulated	24222893	Lnc2Cancer
HOTAIR	Esophageal squamous cell carcinoma	qRT-PCR	esophageal squamous cell carcinoma tissue	Tumor vs Normal	up-regulated	25297587	EVLncRNAs
LINC01158	Esophageal squamous cell carcinoma	Luciferase reporter assay; qPCR; RIP; Western blot	esophageal squamous cell carcinoma tissue	Tumor vs Normal	up-regulated	24631494	Lnc2Cancer
LINC01426	Esophageal squamous cell carcinoma	Luciferase reporter assay; qPCR; Western blot	esophageal squamous cell carcinoma tissue	Tumor vs Normal	up-regulated	25486427	Lnc2Cancer
LOC100130476	Esophageal squamous cell carcinoma	Luciferase reporter assay; qPCR	esophageal squamous cell carcinoma tissue; TE1, TE13, T.Tn, Eca109 cell line	Tumor vs Normal	down-regulated	27338851	Lnc2Cancer; LncRNADisease
MALAT1	Esophageal squamous cell carcinoma	Luciferase reporter assay; qPCR	esophageal squamous cell carcinoma tissue; EC109, EC9706, KYSE150, KYSE450 cell line	High stage vs Low stage	up-regulated	25613496	Lnc2Cancer; LncRNADisease
MALAT1	Esophageal squamous cell carcinoma	Luciferase reporter assay; qPCR	esophageal squamous cell carcinoma tissue; TE1, KYSE30, KYSE70, KYSE150, KYSE270, KYSE410, EC9706 cell line	Tumor vs Normal	up-regulated	26493997	Lnc2Cancer; LncRNADisease
MALAT1	Esophageal squamous cell carcinoma	qRT-PCR	esophageal squamous cell carcinoma tissues	Tumor vs Normal	down-regulated	27015363	EVLncRNAs
NEAT1	Esophageal squamous cell carcinoma	qPCR; RNAi	esophageal squamous cell carcinoma tissue; SHEE, SHEEC cell line	Tumor vs Normal	up-regulated	26609486	Lnc2Cancer; LncRNADisease
PCAT1	Esophageal squamous cell carcinoma	qPCR	esophageal squamous cell carcinoma tissue	High stage vs Low stage	up-regulated	25731728	Lnc2Cancer
PCAT1	Esophageal squamous cell carcinoma	qPCR	esophageal squamous cell carcinoma tissue	Tumor vs Normal	up-regulated	25731728	Lnc2Cancer
POU3F3	Esophageal squamous cell carcinoma	qPCR; Western blot; Luciferase reporter assay; RIP	esophageal squamous cell carcinoma tissue	Tumor vs Normal	up-regulated	24631494	Lnc2Cancer
POU3F3	Esophageal squamous cell carcinoma	qPCR	blood (plasma and serum)	Tumor vs Normal	up-regulated	25608466	Lnc2Cancer
SOX2-OT	Esophageal squamous cell carcinoma	qPCR	esophageal squamous cell carcinoma tissue; NT2, U-87 MG cell line	Tumor vs Normal	up-regulated	24105929	Lnc2Cancer
SPRY4-IT1	Esophageal squamous cell carcinoma	qPCR; Western blot	esophageal squamous cell carcinoma tissue; KYSE-450, KYSE-510, KYSE-150 cell line	Tumor vs Normal	up-regulated	24810925	Lnc2Cancer
SPRY4-IT1	Esophageal squamous cell carcinoma	qPCR; Western blot	EC109, EC9706, KYSE30, KYSE450 cell line	Tumor vs Normal	up-regulated	26883252	Lnc2Cancer; LncRNADisease
SPRY4-IT1	Esophageal squamous cell carcinoma	qPCR; Western blot	EC109, KYSE150, Eca9706, EC18, EC1 cell line	Tumor vs Normal	up-regulated	27250657	Lnc2Cancer; LncRNADisease
TUG1	Esophageal squamous cell carcinoma	FCA; qPCR; RNAi	esophageal squamous cell carcinoma tissue	Tumor vs Normal	up-regulated	25366138	Lnc2Cancer; LncRNADisease
TUG1	Esophageal squamous cell carcinoma	FCA; qPCR; RNAi	esophageal squamous cell carcinoma tissue	Tumor vs Normal	up-regulated	27329359	Lnc2Cancer; LncRNADisease
TUSC7	Esophageal squamous cell carcinoma	qPCR; RNAi	esophageal squamous cell carcinoma tissue; KYSE30, KYSE 70, KYSE 150, KYSE510, Eca109 cell line	High stage vs Low stage	down-regulated	25169763	Lnc2Cancer
TUSC7	Esophageal squamous cell carcinoma	qPCR; RNAi	esophageal squamous cell carcinoma tissue; KYSE30, KYSE 70, KYSE 150, KYSE510, Eca109 cell line	Tumor vs Normal	down-regulated	25169763	Lnc2Cancer
UCA1	Esophageal squamous cell carcinoma	qPCR; Microarray	esophageal squamous cell carcinoma tissue; EC109, EC9706, KYSE150, KYSE510 cell line	High stage vs Low stage	up-regulated	25550835	Lnc2Cancer; LncRNADisease
UCA1	Esophageal squamous cell carcinoma	qPCR; Microarray	esophageal squamous cell carcinoma tissue; EC109, EC9706, KYSE150, KYSE510 cell line	Tumor vs Normal	up-regulated	25550835	Lnc2Cancer; LncRNADisease
UCA1	Esophageal squamous cell carcinoma	qPCR; Microarray	EC109 cell line	Tumor vs Normal	down-regulated	27267823	Lnc2Cancer; LncRNADisease
ZEB1-AS1	Esophageal squamous cell carcinoma	qPCR	esophageal squamous cell carcinoma tissue	Tumor vs Normal	up-regulated	26617942	Lnc2Cancer
ABHD11-AS1	Gastric cancer	qPCR	gastric cancer tissue	Tumor vs Normal	up-regulated	24984296	Lnc2Cancer; LncRNADisease
ABHD11-AS1	Gastric cancer	qPCR	gastric cancer tissue	Tumor vs Normal	up-regulated	26280398	Lnc2Cancer; LncRNADisease
AC104699.1	Gastric cancer	qPCR; Microarray	gastric cancer tissue	Tumor vs Normal	up-regulated	26045391	Lnc2Cancer
BANCR	Gastric cancer	qPCR	gastric cancer tissue	Tumor vs Normal	up-regulated	26054683	Lnc2Cancer; LncRNADisease
BLACAT1	Gastric cancer	qPCR; RNAi	gastric cancer tissue; BGC-823, SGC-7901, AGS, MKN-45, HGC-27 cell line	Tumor vs Normal	up-regulated	25755750	Lnc2Cancer
CCAT1	Gastric cancer	qPCR; Western blot	gastric cancer tissue; AGS, MKN45 cell line	Tumor vs Normal	up-regulated	23143645	Lnc2Cancer; LncRNADisease
CCAT1	Gastric cancer	qPCR; Western blot	gastric cancer tissue	Tumor vs Normal	up-regulated	25561974	Lnc2Cancer; LncRNADisease
CCAT1	Gastric cancer	qPCR; Western blot	gastric cancer tissue	Tumor vs Normal	up-regulated	25674211	Lnc2Cancer; LncRNADisease
CCAT2	Gastric cancer	qPCR; RNAi	gastric cancer tissue; BGC-823, SGC-7901, AGS, MKN-45, HGC-27 cell line	Tumor vs Normal	up-regulated	25755774	Lnc2Cancer; LncRNADisease
CDKN2B-AS1	Gastric cancer	qPCR; RIP; RNAi; Western blot	gastric cancer tissue; SGC7901, BGC823, MGC803 cell line	High stage vs Low stage	up-regulated	24810364	Lnc2Cancer; LncRNADisease
CTD-3080P12.3	Gastric cancer	qPCR; Western blot; Luciferase reporter assay	gastric cancer tissue; KATO-III, SGC-7901, MKN28, AGS, MKN45 cell line	Tumor vs Normal	up-regulated	26549025	Lnc2Cancer
CYTOR	Gastric cancer	ISH; qPCR; RIP; RNA pull-down assay; Western blot	gastric cancer tissue; AGS, BGC-823, MGC-803, SGC-7901 cell line	Tumor vs Normal	up-regulated	24523021	Lnc2Cancer
CYTOR	Gastric cancer	ISH; qPCR; RIP; RNA pull-down assay; Western blot	blood	Tumor vs Normal	up-regulated	25391424	Lnc2Cancer
CYTOR	Gastric cancer	ISH; qPCR; RIP; RNA pull-down assay; Western blot	gastric cancer tissue; HCG-27, SGC-7901 cell line	Tumor vs Normal	up-regulated	26237576	Lnc2Cancer
CYTOR	Gastric cancer	ISH; qPCR; RIP; RNA pull-down assay; Western blot	gastric cancer tissue; MGC803, HGC-27 cell line	Tumor vs Normal	up-regulated	26538117	Lnc2Cancer
CYTOR	Gastric cancer	ISH; qPCR; RIP; RNA pull-down assay; Western blot	gastric cancer tissue	Tumor vs Normal	up-regulated	27143813	MNDR
DKFZP434K028	Gastric cancer	qPCR; Microarray	gastric cancer tissue; HCG-27, SGC-7901 cell line	Tumor vs Normal	down-regulated	26237576	Lnc2Cancer
EGFLAM-AS1	Gastric cancer	qPCR; RNAi; Western blot	gastric cancer tissue; SGC-7901, AGS, BGC-823, HG-27, GES-1 cell line	Tumor vs Normal	down-regulated	26537802	Lnc2Cancer
ERCC1	Gastric cancer	qPCR	gastric cancer tissue; AGS, SGC-7901, BGC-823, HG27 cell line	Tumor vs Normal	down-regulated	25260808	Lnc2Cancer
FENDRR	Gastric cancer	qPCR; Western blot	gastric cancer tissue; MGC803, BGC823, MKN28, MKN45, SGC7901 cell line	High stage vs Low stage	down-regulated	25167886	Lnc2Cancer; LncRNADisease
FENDRR	Gastric cancer	qPCR; Western blot	gastric cancer tissue; MGC803, BGC823, MKN28, MKN45, SGC7901 cell line	Tumor vs Normal	down-regulated	25167886	Lnc2Cancer; LncRNADisease
FRGCA	Gastric cancer	qPCR; RNAi	gastric cancer tissue; AGS, MGC803, BGC823, SGC7901 cell line	Tumor vs Normal	up-regulated	26261500	Lnc2Cancer; LncRNADisease
GACAT1	Gastric cancer	qPCR	gastric cancer tissue	Tumor vs Normal	down-regulated	23645148	Lnc2Cancer
GACAT2	Gastric cancer	qPCR; RIP	gastric cancer tissue; AGS, BGC-823, HGC-27, MGC-803, SGC-7901 cell line	Tumor vs Normal	down-regulated	24961350	Lnc2Cancer; LncRNADisease
GACAT3	Gastric cancer	qPCR	gastric cancer tissue; AGS, BGC-823, MGC-803, SGC-7901 cell line	Tumor vs Normal	up-regulated	24969565	Lnc2Cancer; LncRNADisease
GAPLINC	Gastric cancer	ISH; Microarray	gastric cancer tissue	Tumor vs Normal	up-regulated	25277524	Lnc2Cancer
GAS5	Gastric cancer	FCM; qPCR; RIP; RNAi; Western blot	gastric cancer tissue; SGC7901, BGC823, MGC803, MKN45, MKN28 cell line	Tumor vs Normal	down-regulated	24884417	Lnc2Cancer; LncRNADisease
GAS5	Gastric cancer	FCM; qPCR; RIP; RNAi; Western blot	gastric cancer tissue; AGS, BGC-823, MGC-803 cell line	High stage vs Low stage	down-regulated	26278580	Lnc2Cancer; LncRNADisease
GAS5	Gastric cancer	FCM; qPCR; RIP; RNAi; Western blot	gastric cancer tissue; AGS, BGC-823, MGC-803 cell line	Tumor vs Normal	down-regulated	26278580	Lnc2Cancer; LncRNADisease
GATA6-AS1	Gastric cancer	qPCR; RNA-seq	gastric cancer tissue; B16F1 cell line	Tumor vs Normal	down-regulated	23846333	Lnc2Cancer
GHET1	Gastric cancer	Luciferase reporter assay; qPCR; RIP; RNAi; Western blot	gastric cancer tissue; MKN45, AGS cell line	Tumor vs Normal	up-regulated	24397586	Lnc2Cancer
GHET1	Gastric cancer	Luciferase reporter assay; qPCR; RIP; RNAi; Western blot	gastric cancer tissue; AGS, MKN45, 7901 cell line	Tumor vs Normal	up-regulated	26096073	Lnc2Cancer
H19	Gastric cancer	Genotyping	gastric cancer tissue; AGS, MKN45, MGC803, SGC7901, GES-1 cell line	Tumor vs Normal	up-regulated	22776265	Lnc2Cancer; LncRNADisease
H19	Gastric cancer	Genotyping	gastric cancer tissue; HGC27 cell line	Tumor vs Normal	up-regulated	23898077	Lnc2Cancer
H19	Gastric cancer	Genotyping	gastric cancer tissue; GES-1, AGS, MGC-803, SGC-7901 cell line	Tumor vs Normal	up-regulated	24063685	Lnc2Cancer
H19	Gastric cancer	Genotyping	gastric cancer tissue; AGS, MKN45, 7901 cell line	Tumor vs Normal	up-regulated	26096073	Lnc2Cancer; LncRNADisease
H19	Gastric cancer	Genotyping	gastric cancer tissue	Tumor vs Normal	up-regulated	26160158	Lnc2Cancer; LncRNADisease
H19	Gastric cancer	Genotyping	gastric cancer tissue; HCG-27, SGC-7901 cell line	Tumor vs Normal	up-regulated	26237576	Lnc2Cancer
H19	Gastric cancer	qRT-PCR	SGC7901 cell line	Tumor vs Normal	up-regulated	27143813	MNDR
H19	Gastric cancer	Genotyping	gastric cancer tissue	Tumor vs Normal	up-regulated	27184562	Lnc2Cancer; LncRNADisease
HIF1A-AS2	Gastric cancer	qPCR	gastric cancer tissue; blood(serum)	Tumor vs Normal	up-regulated	25686741	Lnc2Cancer; LncRNADisease
HNF1A-AS1	Gastric cancer	qPCR; Microarray	gastric cancer tissue; AGS, BGC-823, MKN-45 cell line	Tumor vs Normal	down-regulated	26472090	Lnc2Cancer; LncRNADisease
HOTAIR	Gastric cancer	ELISA; Luciferase reporter assay; qPCR; RNAi	gastric cancer tissue; GES-1, AGS, SGC-7901, MKN-45, HGC-27 cell line	High stage vs Low stage	up-regulated	23847441	Lnc2Cancer; LncRNADisease
HOTAIR	Gastric cancer	ELISA; Luciferase reporter assay; qPCR; RNAi	gastric cancer tissue; GES-1, AGS, SGC-7901, MKN-45, HGC-27 cell line	Tumor vs Normal	up-regulated	23847441	Lnc2Cancer; LncRNADisease
HOTAIR	Gastric cancer	ELISA; Luciferase reporter assay; qPCR; RNAi	gastric cancer tissue; MKN74, KATO III cell line	Tumor vs Normal	up-regulated	24130837	Lnc2Cancer; LncRNADisease
HOTAIR	Gastric cancer	ELISA; Luciferase reporter assay; qPCR; RNAi	gastric cancer tissue; MGC-803, SGC-7901, BGC-823, AGS cell line	Tumor vs Normal	up-regulated	24775712	Lnc2Cancer
HOTAIR	Gastric cancer	ELISA; Luciferase reporter assay; qPCR; RNAi	gastric cancer tissue; MGC-803, SGC-7901, BGC-823, AGS cell line	High stage vs Low stage	up-regulated	24775712	Lnc2Cancer
HOTAIR	Gastric cancer	ELISA; Luciferase reporter assay; qPCR; RNAi	gastric cancer tissue	Tumor vs Normal	up-regulated	24949306	Lnc2Cancer; LncRNADisease
HOTAIR	Gastric cancer	ELISA; Luciferase reporter assay; qPCR; RNAi	gastric cancer tissue; gastric cell line	Tumor vs Normal	up-regulated	25063030	Lnc2Cancer
HOTAIR	Gastric cancer	ELISA; Luciferase reporter assay; qPCR; RNAi	gastric cancer tissue; MKN7, MKN45, MKN74, NUGC4, AZ521, AGS, KATOIII cell line	Tumor vs Normal	up-regulated	25280565	Lnc2Cancer; LncRNADisease
HOTAIR	Gastric cancer	ELISA; Luciferase reporter assay; qPCR; RNAi	gastric cancer tissue	Tumor vs Normal	up-regulated	25612617	Lnc2Cancer; MNDR
HOTAIR	Gastric cancer	ELISA; Luciferase reporter assay; qPCR; RNAi	gastric cancer tissue; AGS, MKN45, 7901 cell line	Tumor vs Normal	up-regulated	26096073	Lnc2Cancer
HOTAIR	Gastric cancer	ELISA; Luciferase reporter assay; qPCR; RNAi	gastric cancer tissue; SGC7901, MGC-803 cell line	Tumor vs Normal	up-regulated	26187665	Lnc2Cancer; LncRNADisease
HOTAIR	Gastric cancer	ELISA; Luciferase reporter assay; qPCR; RNAi	gastric cancer tissue; HCG-27, SGC-7901 cell line	Tumor vs Normal	up-regulated	26237576	Lnc2Cancer
HOTTIP	Gastric cancer	qPCR; RNAi	gastric cancer tissue; AGS, SGC-7901, BGC-823, MKN-28 cell line	High stage vs Low stage	up-regulated	27103834	Lnc2Cancer; LncRNADisease
HOTTIP	Gastric cancer	qPCR; RNAi	gastric cancer tissue; AGS, SGC-7901, BGC-823, MKN-28 cell line	Tumor vs Normal	up-regulated	27103834	Lnc2Cancer; LncRNADisease
HOTTIP	Gastric cancer	qPCR; RNAi	gastric cancer cell line	High stage vs Low stage	up-regulated	27108607	MNDR; LncRNADisease
HOTTIP	Gastric cancer	qPCR; RNAi	gastric cancer cell line	High grade vs Low grade	up-regulated	27108607	MNDR; LncRNADisease
HOTTIP	Gastric cancer	qPCR; RNAi	gastric cancer cell line	Tumor vs Normal	up-regulated	27108607	MNDR; LncRNADisease
HOXA13	Gastric cancer	qRT-PCR; Western blot	gastric cancer cell line	High stage vs Low stage	up-regulated	27108607	MNDR
HOXA13	Gastric cancer	qRT-PCR; Western blot	gastric cancer cell line	High grade vs Low grade	up-regulated	27108607	MNDR
HOXA13	Gastric cancer	qRT-PCR; Western blot	gastric cancer cell line	Tumor vs Normal	up-regulated	27108607	MNDR
HOXA-AS2	Gastric cancer	Luciferase reporter assay; qPCR; Western blot; Microarray	gastric cancer tissue; BGC823, SGC7901, AGS cell line	High stage vs Low stage	up-regulated	26384350	Lnc2Cancer; LncRNADisease
HOXA-AS2	Gastric cancer	Luciferase reporter assay; qPCR; Western blot; Microarray	gastric cancer tissue; BGC823, SGC7901, AGS cell line	Tumor vs Normal	up-regulated	26384350	Lnc2Cancer; LncRNADisease
HULC	Gastric cancer	qPCR	gastric cancer tissue; GES-1, SGC7901, MKN28, MKN45, AGS, BGC823 cell line	Tumor vs Normal	up-regulated	24247585	Lnc2Cancer; LncRNADisease
HULC	Gastric cancer	qPCR	gastric cancer tissue; AGS, MKN45, 7901 cell line	Tumor vs Normal	up-regulated	26096073	Lnc2Cancer
HULC	Gastric cancer	qPCR	blood; AGS, SGC-7901, MGC-803, MKN-45 cell line	Tumor vs Normal	up-regulated	27322075	Lnc2Cancer; LncRNADisease
INTS7	Gastric cancer	qPCR; Microarray	gastric cancer tissue	Tumor vs Normal	up-regulated	26045391	Lnc2Cancer
LINC00261	Gastric cancer	qPCR; Microarray	gastric cancer tissue; HCG-27, SGC-7901 cell line	Tumor vs Normal	down-regulated	26237576	Lnc2Cancer
LINC00668	Gastric cancer	Luciferase reporter assay; qPCR; RIP; Western blot	gastric cancer tissue; SGC-7901, BGC-823, MGC-803 cell line	Tumor vs Normal	up-regulated	27036039	Lnc2Cancer; LncRNADisease
LINC00901	Gastric cancer	qPCR; RNAi; Microarray	gastric cancer tissue	Tumor vs Normal	down-regulated	25765901	Lnc2Cancer
LINC00982	Gastric cancer	FCA; qPCR; RNAi; Western blot; Microarray	gastric cancer tissue; SGC7901, BGC823, MGC803, AGS, MKN45 cell line	Tumor vs Normal	down-regulated	26334618	Lnc2Cancer; LncRNADisease
LINC01612	Gastric cancer	qPCR; Microarray	gastric cancer tissue	Tumor vs Normal	down-regulated	26045391	Lnc2Cancer; LncRNADisease
LINC-ROR	Gastric cancer	qPCR; RNAi; Western blot	AGS cell line	Tumor vs Normal	up-regulated	26169368	Lnc2Cancer
LSINCT5	Gastric cancer	qPCR	gastric cancer tissue; AGS, MKN-45, MGC-803, BGC-823, HGC-27 cell line	Tumor vs Normal	up-regulated	25526476	Lnc2Cancer
MALAT1	Gastric cancer	ChIP; qPCR; RNAi; Western blot	gastric cancer tissue; MKN7, MKN45, MKN74, NUGC4, AZ521, AGS, KATOIII cell line	Tumor vs Normal	up-regulated	25280565	Lnc2Cancer
MALAT1	Gastric cancer	ChIP; qPCR; RNAi; Western blot	gastric cancer tissue; AGS, MKN45, 7901 cell line	Tumor vs Normal	up-regulated	26096073	Lnc2Cancer
MALAT1	Gastric cancer	ChIP; qPCR; RNAi; Western blot	gastric cancer tissue; MKN28, SGC7901, BGC823 cell line	Tumor vs Normal	up-regulated	27259812	Lnc2Cancer; LncRNADisease
MEG3	Gastric cancer	Immunoblot; Luciferase reporter assay; RT-PCR	gastric cancer tissue; SGC7901, AGS, MGC803, MKN45, BGC823 cell line	Tumor vs Normal	down-regulated	24006224	Lnc2Cancer
MEG3	Gastric cancer	Immunoblot; Luciferase reporter assay; RT-PCR	gastric cancer tissue; SGC-7901, BGC-823, GES-1 cell line	Tumor vs Normal	down-regulated	24515776	Lnc2Cancer; LncRNADisease
MEG3	Gastric cancer	Immunoblot; Luciferase reporter assay; RT-PCR	gastric cancer tissue; GES-1 cell line	Tumor vs Normal	down-regulated	26233544	Lnc2Cancer; LncRNADisease
MEG3	Gastric cancer	Immunoblot; Luciferase reporter assay; RT-PCR	gastric cancer cell line	High stage vs Low stage	down-regulated	26253106	MNDR; LncRNADisease
MEG3	Gastric cancer	Immunoblot; Luciferase reporter assay; RT-PCR	gastric cancer cell line	Tumor vs Normal	down-regulated	26253106	MNDR; LncRNADisease
MYLK-AS1	Gastric cancer	qPCR; Microarray	gastric cancer tissue	Tumor vs Normal	down-regulated	26045391	Lnc2Cancer
NCRUPAR	Gastric cancer	qPCR	gastric cancer tissue	Tumor vs Normal	down-regulated	24817013	Lnc2Cancer
NPTN-IT1	Gastric cancer	qPCR	gastric cancer tissue	Tumor vs Normal	down-regulated	25674261	Lnc2Cancer
PRSS21	Gastric cancer	qPCR; Microarray	gastric cancer tissue	Tumor vs Normal	up-regulated	26045391	Lnc2Cancer
PVT1	Gastric cancer	qPCR; Microarray	gastric cancer tissue; SGC7901 cell line	Tumor vs Normal	up-regulated	25258543	Lnc2Cancer; LncRNADisease
PVT1	Gastric cancer	qPCR; Microarray	gastric cancer tissue; AGS, MKN45, 7901 cell line	Tumor vs Normal	up-regulated	26096073	Lnc2Cancer
PVT1	Gastric cancer	qPCR; Microarray	SgC7901, BgC823, MgC803, AgS, MKN45, gES1 cell line	Tumor vs Normal	up-regulated	26925791	Lnc2Cancer; LncRNADisease
RPL34-AS1	Gastric cancer	qPCR; Microarray	gastric cancer tissue; HCG-27, SGC-7901 cell line	Tumor vs Normal	down-regulated	26237576	Lnc2Cancer
SGK1	Gastric cancer	Dual Luciferase reporter assay; IHC; qPCR	gastric cancer tissue	Tumor vs Normal	up-regulated	26942879	Lnc2Cancer
SNHG15	Gastric cancer	qPCR; RNAi; Western blot	SGC7901, BGC823, MGC803, AGS, MKN45, GES-1 cell line	Tumor vs Normal	up-regulated	26662309	Lnc2Cancer; LncRNADisease
SNHG15	Gastric cancer	qPCR; RNAi; Western blot	SGC7901, BGC823, MGC803, AGS, MKN45, GES-1 cell line	High stage vs Low stage	up-regulated	26662309	Lnc2Cancer; LncRNADisease
SPRY4-IT1	Gastric cancer	qPCR; RNAi; Western blot	gastric cancer tissue; cell lineAGS, BGC-823, HGC-27, SGC-7901, MGC80-3, MKN-45 cell line	Tumor vs Normal	down-regulated	25835973	Lnc2Cancer
SPRY4-IT1	Gastric cancer	qPCR; RNAi; Western blot	gastric cancer tissue; SGC7901, BGC823, MGC803, AGS, MKN45 cell line	Tumor vs Normal	down-regulated	26238992	Lnc2Cancer; LncRNADisease
TINCR	Gastric cancer	qPCR; RNAi; Western blot; RNA-seq	gastric cancer tissue; MGC803, BGC823, MKN45, SGC7901 cell line	Tumor vs Normal	up-regulated	25728677	Lnc2Cancer
TSNAX-DISC1	Gastric cancer	qPCR; Microarray	gastric cancer tissue	Tumor vs Normal	up-regulated	26045391	Lnc2Cancer
TUG1	Gastric cancer	qPCR; RNAi; Western blot	gastric cancer tissue; SGC-7901 cell line	High stage vs Low stage	up-regulated	27261864	Lnc2Cancer; LncRNADisease
TUG1	Gastric cancer	qPCR; RNAi; Western blot	gastric cancer tissue; SGC-7901 cell line	Tumor vs Normal	up-regulated	27261864	Lnc2Cancer; LncRNADisease
TUSC7	Gastric cancer	qPCR; RNAi; Microarray	gastric cancer tissue	Tumor vs Normal	down-regulated	25765901	Lnc2Cancer
UCA1	Gastric cancer	IF; RT-PCR	gastric cancer cell line	Tumor vs Normal	down-regulated	16914571	MNDR
UCA1	Gastric cancer	IF; RT-PCR	gastric cancer tissue; SGC-7901, BGC-823, MKN-28 cell line	Tumor vs Normal	up-regulated	25903045	Lnc2Cancer
UCA1	Gastric cancer	IF; RT-PCR	gastric cancer tissue; BGC-823, SGC7901 cell line	High grade vs Low grade	up-regulated	27056384	Lnc2Cancer; LncRNADisease
UCA1	Gastric cancer	IF; RT-PCR	gastric cancer tissue; BGC-823, SGC7901 cell line	Tumor vs Normal	up-regulated	27056384	Lnc2Cancer; LncRNADisease
WT1-AS	Gastric cancer	qPCR	gastric cancer tissue; SGC7901, BGC823, MKN45, MKN28, NCI-N87, AGS, HS-746T, GES-1 cell line	Tumor vs Normal	down-regulated	26449525	Lnc2Cancer; LncRNADisease
ZFAS1	Gastric cancer	qPCR; RNAi; RNA pull-down assay; Microarray	gastric cancer tissue; BGC823, SGC7901, MGC803, AGS, HGC27 cell line	Tumor vs Normal	up-regulated	27246976	Lnc2Cancer; LncRNADisease
ZMAT1	Gastric cancer	qPCR	gastric cancer tissue	Tumor vs Normal	down-regulated	26191264	Lnc2Cancer; LncRNADisease
BANCR	Gastric adenocarcinoma	MTT assay; qPCR; RNAi; Western blot	gastric adenocarcinoma tissue; BGC823, SGC7901 cell line	Tumor vs Normal	up-regulated	26248136	Lnc2Cancer
HOTAIR	Gastric adenocarcinoma	qPCR	gastric adenocarcinoma tissue	High stage vs Low stage	up-regulated	23888369	Lnc2Cancer
HOTAIR	Gastric adenocarcinoma	qPCR	gastric adenocarcinoma tissue	Tumor vs Normal	up-regulated	23888369	Lnc2Cancer
HOTAIR	Gastric adenocarcinoma	qPCR	gastric adenocarcinoma tissue	Tumor vs Normal	up-regulated	26328013	Lnc2Cancer; LncRNADisease
LINC01207	Gastric adenocarcinoma	qPCR; Microarray	primary gastric adenocarcinoma tissue	Tumor vs Normal	up-regulated	24819045	Lnc2Cancer
SLCO5A1	Gastric adenocarcinoma	qPCR	primary gastric adenocarcinoma tissue	Tumor vs Normal	up-regulated	24819045	Lnc2Cancer
LINC-ROR	Liver tumor	RT-PCR; Knockdown	HepG2; non-malignant hepatocytes	Tumor vs Normal	up-regulated	24463816	EVLncRNAs
UCA1	Liver tumor	ChIP; ISH; qPCR; RIP; Western blot	liver cancer cell line	Tumor vs Normal	down-regulated	16914571	MNDR
TFDP1	Hepatocellular carcinoma	Luciferase reporter assay; Microarray	hepatocellular cancer tissue	Tumor vs Normal	down-regulated	26812074	Lnc2Cancer; LncRNADisease
CCAT1	Hepatocellular carcinoma	qPCR	hepatocellular carcinoma tissue; L-02, HepG2, SNU423, SMMC-7721, Hep3B cell line	Tumor vs Normal	up-regulated	26191246	Lnc2Cancer; LncRNADisease
CDKN2B-AS1	Hepatocellular carcinoma	qPCR; RIP; RNAi; Western blot	hepatocellular carcinoma tissue; HepG2, Hep3B, MHCC-97H cell line	Tumor vs Normal	up-regulated	25966845	Lnc2Cancer
CDKN2B-AS1	Hepatocellular carcinoma	qPCR; RIP; RNAi; Western blot	hepatocellular carcinoma tissue; (HepG2 cell line	Tumor vs Normal	up-regulated	26045820	Lnc2Cancer
CPS1-IT1	Hepatocellular carcinoma	qPCR; RNAi; RNA pull-down assay; Western blot; Microarray	hepatocellular carcinoma tissue; J7, HepG2, SK-Hep1 cell line	Tumor vs Normal	down-regulated	27248828	Lnc2Cancer; LncRNADisease
CYTOR	Hepatocellular carcinoma	Dual Luciferase reporter assay; qPCR; RNAi; Western blot	blood(plasma); hepatocellular carcinoma tissue	Tumor vs Normal	up-regulated	26356260	Lnc2Cancer
CYTOR	Hepatocellular carcinoma	Dual Luciferase reporter assay; qPCR; RNAi; Western blot	hepatocellular carcinoma tissue; HepG2, Hep3B, SNU-423 cells. Huh7, L02, SMMC-7721, MHCC-97H cell line	Tumor vs Normal	up-regulated	26540343	Lnc2Cancer
EGFR-AS1	Hepatocellular carcinoma	FCA; qPCR; RNAi; Western blot; Microarray	hepatocellular carcinoma tissue; SMMC-7721, LM-9, Huh-7, HepG2 cell line	Tumor vs Normal	up-regulated	26271667	Lnc2Cancer; LncRNADisease
FAM83A-AS1	Hepatocellular carcinoma	qPCR; Microarray	hepatocellular carcinoma tissue	Tumor vs Normal	down-regulated	25025236	Lnc2Cancer
GAS5	Hepatocellular carcinoma	Luciferase reporter assay; qPCR; Western blot; Genotyping	hepatocellular carcinoma tissue	Tumor vs Normal	down-regulated	25120813	Lnc2Cancer; LncRNADisease
GAS5	Hepatocellular carcinoma	Luciferase reporter assay; qPCR; Western blot; Genotyping	HBV-related hepatocellular carcinoma tissue	Tumor vs Normal	up-regulated	26109807	Lnc2Cancer
GAS5	Hepatocellular carcinoma	Luciferase reporter assay; qPCR; Western blot; Genotyping	hepatocellular carcinoma tissue; Bel-7402, SMMC-7721, HCCLM3 cell line	Tumor vs Normal	up-regulated	26404135	Lnc2Cancer; LncRNADisease
H19	Hepatocellular carcinoma	Northern blot; qPCR; RIP; Western blot	T24P, HepG2, Hep3B cell line	Hypoxia vs Normoxia	up-regulated	17786216	Lnc2Cancer; LncRNADisease
H19	Hepatocellular carcinoma	Northern blot; qPCR; RIP; Western blot	SMMC-7721, HepG2 cell line	Tumor vs Normal	up-regulated	24063685	Lnc2Cancer
HEIH	Hepatocellular carcinoma	qPCR; Microarray	hepatocellular carcinoma tissue; Huh7, HepG2 cell line	Tumor vs Normal	up-regulated	21769904	Lnc2Cancer; MNDR
HEIH	Hepatocellular carcinoma	qPCR; Microarray	MHCC97L, HepG2, cHL-7702 cell line	Tumor vs Normal	up-regulated	26550214	Lnc2Cancer; LncRNADisease
HELLS	Hepatocellular carcinoma	qPCR	hepatocellular carcinoma tissue	Tumor vs Normal	up-regulated	26540467	Lnc2Cancer
HNF1A-AS1	Hepatocellular carcinoma	qPCR; Western blot	hepatocellular carcinoma tissue; HepG2, SMMC-7721, PLC/PRF/5, Huh7 cell line	High grade vs Low grade	up-regulated	27084450	Lnc2Cancer; LncRNADisease
HNF1A-AS1	Hepatocellular carcinoma	qPCR; Western blot	hepatocellular carcinoma tissue; HepG2, SMMC-7721, PLC/PRF/5, Huh7 cell line	High stage vs Low stage	up-regulated	27084450	Lnc2Cancer; LncRNADisease
HNF1A-AS1	Hepatocellular carcinoma	qPCR; Western blot	hepatocellular carcinoma tissue; HepG2, SMMC-7721, PLC/PRF/5, Huh7 cell line	Tumor vs Normal	up-regulated	27084450	Lnc2Cancer; LncRNADisease
HOTAIR	Hepatocellular carcinoma	qPCR; RNAi; Western blot	hepatocellular carcinoma tissue; SMMC-7721, HepG2, Hep3B cell line	Tumor vs Normal	up-regulated	21327457	Lnc2Cancer; MNDR; LncRNADisease
HOTAIR	Hepatocellular carcinoma	qPCR; RNAi; Western blot	Bel7402 cell line	Tumor vs Normal	up-regulated	22289527	Lnc2Cancer; MNDR; LncRNADisease
HOTAIR	Hepatocellular carcinoma	qPCR; RNAi; Western blot	HepG2, Bel7404, PLC5, Huh7 cell line	Tumor vs Normal	up-regulated	26024833	Lnc2Cancer; MNDR; LncRNADisease
HOTAIR	Hepatocellular carcinoma	qPCR; RNAi; Western blot	hepatocellular carcinoma tissue; Huh7, HepG2, Hep3B, BEL-7402 cell line	Tumor vs Normal	up-regulated	27301338	Lnc2Cancer; LncRNADisease
HOTTIP	Hepatocellular carcinoma	Luciferase reporter assay; qPCR	hepatocellular carcinoma tissue; SNU182, SNU449, SNU423, SNU387, SNU475 cell line	Tumor vs Normal	up-regulated	24114970	Lnc2Cancer
HOXA13	Hepatocellular carcinoma	qPCR; RNAi; Western blot	hepatocellular carcinoma tissue; SNU182, SNU449, SNU423, SNU387, SNU475 cell line	Tumor vs Normal	up-regulated	24114970	Lnc2Cancer
LINC00173	Hepatocellular carcinoma	qPCR; Microarray	Hep3B, HepG2, SMMC-7721, MHCC-97L, MHCC-97H, HCCLM3 cell line	Tumor vs Normal	down-regulated	25556502	Lnc2Cancer
LINC00383	Hepatocellular carcinoma	qPCR; Microarray	Hep3B, HepG2, SMMC-7721, MHCC-97L, MHCC-97H, HCCLM3 cell line	Tumor vs Normal	up-regulated	25556502	Lnc2Cancer
LINC01018	Hepatocellular carcinoma	qPCR	hepatocellular carcinoma tissue; BEL-7402, SK-Hep1, Huh7, MHCC-97H cell line	Tumor vs Normal	down-regulated	25512078	Lnc2Cancer
LINC01419	Hepatocellular carcinoma	qPCR; Microarray	HBV-related hepatocellular carcinoma tissue	Tumor vs Normal	up-regulated	26109807	Lnc2Cancer
LINC01419	Hepatocellular carcinoma	qPCR; Microarray	hepatocellular carcinoma tissue	Tumor vs Normal	up-regulated	26540467	Lnc2Cancer; LncRNADisease
LINC01451	Hepatocellular carcinoma	qPCR; RIP; RNA pull-down assay	hepatocellular carcinoma tissue	Tumor vs Normal	up-regulated	21769904	Lnc2Cancer
MAP3K20	Hepatocellular carcinoma	qPCR; Western blot; Microarray	hepatocellular cancer tissue; DMEM, Gibco, Gaithersburg, MD, USA cell line	Tumor vs Normal	up-regulated	25013376	Lnc2Cancer; LncRNADisease
NEAT1	Hepatocellular carcinoma	qPCR	hepatocellular carcinoma tissue	Tumor vs Normal	up-regulated	26191242	Lnc2Cancer; LncRNADisease
NPTN-IT1	Hepatocellular carcinoma	qPCR; RIP; RNA pull-down assay	hepatocellular carcinoma tissue	Tumor vs Normal	down-regulated	21769904	Lnc2Cancer
NPTN-IT1	Hepatocellular carcinoma	qPCR; RIP; Western blot	hepatocellular carcinoma tissue; QSG-7701, LO2, SMMC-7721 cell line	Tumor vs Normal	down-regulated	23395002	Lnc2Cancer
PANDAR	Hepatocellular carcinoma	qPCR; RNAi	hepatocellular carcinoma tissue; HCCLM3, Hep3B, HepG2 cell line	Tumor vs Normal	up-regulated	26054684	Lnc2Cancer; LncRNADisease
PRR26	Hepatocellular carcinoma	qPCR; Microarray	hepatocellular carcinoma tissue	Tumor vs Normal	down-regulated	25025236	Lnc2Cancer
PVT1	Hepatocellular carcinoma	qPCR	hepatocellular carcinoma tissue; Huh7, SK-hep1, SMMC-7721, HepG2, Hep3B, PLC/PRF/5, Bel-7402 cell line	Tumor vs Normal	up-regulated	25624916	Lnc2Cancer; LncRNADisease
PVT1	Hepatocellular carcinoma	Dual luciferase assay; ISH; qPCR; Western blot	HepG2, Hep3B, Huh-7, HCCLM9, SK-Hep1, SMMC-7721 cell line	Tumor vs Normal	up-regulated	28656879	MNDR
RAD1	Hepatocellular carcinoma	qPCR; Microarray	hepatocellular carcinoma tissue	Tumor vs Normal	up-regulated	25025236	Lnc2Cancer
SNHG1	Hepatocellular carcinoma	FCM; qPCR; RNAi; Western blot	liver tissue; SMMC-7721, MHCC97H, HCCLM3, HepG2 cell line	High stage vs Low stage	up-regulated	27133041	Lnc2Cancer; LncRNADisease
SNHG1	Hepatocellular carcinoma	FCM; qPCR; RNAi; Western blot	liver tissue; SMMC-7721, MHCC97H, HCCLM3, HepG2 cell line	High grade vs Low grade	up-regulated	27133041	Lnc2Cancer; LncRNADisease
SNHG1	Hepatocellular carcinoma	FCM; qPCR; RNAi; Western blot	liver tissue; SMMC-7721, MHCC97H, HCCLM3, HepG2 cell line	Tumor vs Normal	up-regulated	27133041	Lnc2Cancer; LncRNADisease
SNHG15	Hepatocellular carcinoma	qPCR	hepatocellular carcinoma tissue	High grade vs Low grade	up-regulated	27212162	Lnc2Cancer; LncRNADisease
SNHG15	Hepatocellular carcinoma	qPCR	hepatocellular carcinoma tissue	High stage vs Low stage	up-regulated	27212162	Lnc2Cancer; LncRNADisease
SNHG15	Hepatocellular carcinoma	qPCR	hepatocellular carcinoma tissue	Tumor vs Normal	up-regulated	27212162	Lnc2Cancer; LncRNADisease
SNHG19	Hepatocellular carcinoma	qPCR	hepatocellular carcinoma tissue	Tumor vs Normal	up-regulated	26540467	Lnc2Cancer
SNHG20	Hepatocellular carcinoma	qPCR; RNAi	hepatocellular carcinoma tissue; HL-7702, MHCC-97H, HepG2, SK-Hep-1, SMMC-7721 cell line	Tumor vs Normal	up-regulated	27053960	Lnc2Cancer; LncRNADisease
SNHG3	Hepatocellular carcinoma	ISH; qPCR; RNA-seq	hepatocellular carcinoma tissue	Tumor vs Normal	up-regulated	26373735	Lnc2Cancer; LncRNADisease
SOX2-OT	Hepatocellular carcinoma	qPCR; RNAi	hepatocellular carcinoma tissue; HepG2, SMMC-7721 cell line	Tumor vs Normal	up-regulated	26097588	Lnc2Cancer
SPRY4-IT1	Hepatocellular carcinoma	qPCR	blood, Hep-3B, HepG2, HuH-7 cell line	Tumor vs Normal	up-regulated	27278245	Lnc2Cancer; LncRNADisease
TCF7	Hepatocellular carcinoma	FISH; Northern blot; qPCR; Microarray	Hep3B, Huh7, PLC cell line	Tumor vs Normal	up-regulated	25842979	Lnc2Cancer
TUG1	Hepatocellular carcinoma	FCA; qPCR; RIP; RNAi; Western blot	hepatocellular carcinoma tissue; HepG2, MHCC-97H, Hep3B cell line	Tumor vs Normal	up-regulated	26336870	Lnc2Cancer; LncRNADisease
UCA1	Hepatocellular carcinoma	Luciferase reporter assay; qPCR; RIP; Western blot	hepatocellular carcinoma tissue	Tumor vs Normal	up-regulated	26551349	Lnc2Cancer; LncRNADisease
UCA1	Hepatocellular carcinoma	Luciferase reporter assay; qPCR; RIP; Western blot	hepatocellular carcinoma tissue	Tumor vs Normal	up-regulated	27215316	Lnc2Cancer; LncRNADisease
UFC1	Hepatocellular carcinoma	qPCR; Microarray	hepatocellular carcinoma tissue; BEL-7402, SK-Hep1, Huh7, MHCC-97H cell line	Tumor vs Normal	up-regulated	25449213	Lnc2Cancer; LncRNADisease
WRAP53	Hepatocellular carcinoma	qPCR	hepatocellular carcinoma tissue	Tumor vs Normal	up-regulated	26551349	Lnc2Cancer; LncRNADisease
WSPAR	Hepatocellular carcinoma	qPCR; Northern blot; FISH	Hep3B, Huh7, PLC cell line	Tumor vs Normal	up-regulated	25842979	Lnc2Cancer
WT1-AS	Hepatocellular carcinoma	Luciferase reporter assay; qPCR; Western blot	hepatocellular carcinoma tissue	Tumor vs Normal	down-regulated	26462627	Lnc2Cancer; LncRNADisease
ZEB1-AS1	Hepatocellular carcinoma	qPCR; Microarray	hepatocellular carcinoma tissue	Tumor vs Normal	up-regulated	25025236	Lnc2Cancer
ZEB1-AS1	Hepatocellular carcinoma	qPCR; RNAi; Microarray	hepatocellular carcinoma tissue; Huh7, HepG2 cell line	Tumor vs Normal	up-regulated	26073087	Lnc2Cancer
ZNF350-AS1	Hepatocellular carcinoma	qPCR; RIP; RNA pull-down assay; Microarray	hepatocellular carcinoma tissue	Tumor vs Normal	up-regulated	21769904	Lnc2Cancer
ZNF674-AS1	Hepatocellular carcinoma	qPCR; Microarray	hepatocellular carcinoma tissue	Tumor vs Normal	up-regulated	25025236	Lnc2Cancer
TUG1	Hepatoblastoma	qPCR; RNAi; Western blot	hepatoblastoma tissue; HepG2, HuH-6, SMMC-7221 cell line	Tumor vs Normal	up-regulated	27362796	Lnc2Cancer; LncRNADisease
AFAP1-AS1	Lung cancer	qPCR; Western blot; RNA-seq	A549 cell line	Tumor vs Normal	up-regulated	26245991	Lnc2Cancer; LncRNADisease
BANCR	Lung cancer	qPCR; Western blot	lung cancer tissue; NCI-H1688, NCI-H446 cell line	Tumor vs Normal	down-regulated	25661343	Lnc2Cancer; LncRNADisease
BCYRN1	Lung cancer	ISH; Northern hybridization	lung cancer tissue	Tumor vs Normal	up-regulated	9422992	Lnc2Cancer; LncRNADisease
LUCAT1	Lung cancer	qPCR; RIP; Western blot	A549, CL1-0, CL1-5, H1975, HCC-827, NCI-H292 cell line	Smoking vs No smoking	up-regulated	23672216	Lnc2Cancer
MEG3	Lung cancer	ISH; qPCR	lung cancer tissue	Tumor vs Normal	down-regulated	14602737	Lnc2Cancer; LncRNADisease
AC007403.1	Non-small cell lung cancer	qPCR; Microarray	non-small cell lung cancer tissue	Tumor vs Normal	up-regulated	26393913	Lnc2Cancer; LncRNADisease
ADAM12	Non-small cell lung cancer	qPCR	non-small cell lung cancer tissue	Tumor vs Normal	up-regulated	27322209	Lnc2Cancer; LncRNADisease
ADAMTS9-AS2	Non-small cell lung cancer	qPCR; Microarray	non-small cell lung cancer tissue	Tumor vs Normal	down-regulated	25590602	Lnc2Cancer
AGAP2-AS1	Non-small cell lung cancer	FCM; qPCR; RNAi; Western blot	non-small cell lung cancer tissue; A549, PC9, SPCA1, H1975, H1299, H520, SK-MES-1, H1703 cell line	Tumor vs Normal	up-regulated	27195672	Lnc2Cancer; LncRNADisease
BANCR	Non-small cell lung cancer	qPCR; RNAi; Western blot	non-small cell lung cancer tissue; A549, SPC-A1, NCI-H1975, SK-MES-1 cell line	Tumor vs Normal	down-regulated	24655544	Lnc2Cancer; LncRNADisease
CCAT1	Non-small cell lung cancer	qPCR; RNAi; Western blot	non-small cell lung cancer tissue; A549, SPC-A1, NCI-H1975 cell line	Tumor vs Normal	up-regulated	25129441	Lnc2Cancer; LncRNADisease
CDKN2B-AS1	Non-small cell lung cancer	Luciferase reporter assay; qPCR; RNAi; Western blot	non-small cell lung cancer tissue; PC9, SPC-A1, NCI-H1975, H1299, H358 cell line	Tumor vs Normal	up-regulated	25504755	Lnc2Cancer
CDKN2B-AS1	Non-small cell lung cancer	Luciferase reporter assay; qPCR; RNAi; Western blot	ABC-1, H1299 cell line	Tumor vs Normal	up-regulated	26408699	Lnc2Cancer
CDKN2B-AS1	Non-small cell lung cancer	Luciferase reporter assay; qPCR; RNAi; Western blot	non-small cell lung cancer tissue; SK-MES-1, A549, SPC-A1, NCI-H1975 cell line	High stage vs Low stage	up-regulated	27307748	Lnc2Cancer
DLGAP2	Non-small cell lung cancer	qPCR; Microarray	non-small cell lung cancer tissue	Tumor vs Normal	up-regulated	26393913	Lnc2Cancer; LncRNADisease
ERICH1-AS1	Non-small cell lung cancer	qPCR	non-small cell lung cancer tissue	Tumor vs Normal	up-regulated	26393913	Lnc2Cancer
GACAT2	Non-small cell lung cancer	qPCR	non-small cell lung cancer tissue; A549, H157, HEK-293T cell line	Tumor vs Normal	down-regulated	25674259	Lnc2Cancer; LncRNADisease
GAS5	Non-small cell lung cancer	Luciferase reporter assay; qPCR; Western blot	non-small cell lung cancer tissue; A549, H1650, H1299, H1975, SK-MES cell line	Tumor vs Normal	down-regulated	24357161	Lnc2Cancer; LncRNADisease
GAS5	Non-small cell lung cancer	Luciferase reporter assay; qPCR; Western blot	non-small cell lung cancer tissue; H1650, H1299, H1975, A549 cell line	Tumor vs Normal	down-regulated	27338051	Lnc2Cancer; LncRNADisease
GAS6-AS1	Non-small cell lung cancer	qPCR	non-small cell lung cancer tissue	High stage vs Low stage	down-regulated	23979857	Lnc2Cancer; LncRNADisease
GAS6-AS1	Non-small cell lung cancer	qPCR	non-small cell lung cancer tissue	Tumor vs Normal	down-regulated	23979857	Lnc2Cancer; LncRNADisease
GHSR	Non-small cell lung cancer	qPCR; Northern blot	non-small cell lung cancer tissue; A549, NCI-H1299, Beas-2B cell line	Tumor vs Normal	up-regulated	23722988	Lnc2Cancer
GNAS-AS1	Non-small cell lung cancer	qPCR; Microarray	non-small cell lung cancer tissue	Tumor vs Normal	up-regulated	25394782	Lnc2Cancer
H19	Non-small cell lung cancer	RT-PCR; Luciferase reporter assay; Chromosome immune coprecipitation (ChIP); Flow cytometry	non-small cell lung cancer tissues	Tumor vs Normal	up-regulated	26722426	EVLncRNAs
HIF1A-AS1	Non-small cell lung cancer	qPCR	non-small cell lung cancer tissue	Tumor vs Normal	up-regulated	26339353	Lnc2Cancer; LncRNADisease
HOTAIR	Non-small cell lung cancer	Luciferase reporter assay; qPCR; RNAi; Western blot	non-small cell lung cancer tissue; A549 cell line	High stage vs Low stage	up-regulated	23743197	Lnc2Cancer; LncRNADisease
HOTAIR	Non-small cell lung cancer	Luciferase reporter assay; qPCR; RNAi; Western blot	non-small cell lung cancer tissue; A549 cell line	Tumor vs Normal	up-regulated	23743197	Lnc2Cancer; LncRNADisease
HOTAIR	Non-small cell lung cancer	Luciferase reporter assay; qPCR; RNAi; Western blot	non-small cell lung cancer tissue; A549, SPC-A1, NCI-H1975 cell line	Tumor vs Normal	up-regulated	24103700	Lnc2Cancer; LncRNADisease
HOTTIP	Non-small cell lung cancer	FCM; qPCR; RNAi	non-small cell lung cancer tissue; A549, SPC-A1, NCI-H1975, SK-MES-1 cell line	Tumor vs Normal	up-regulated	27347311	Lnc2Cancer; LncRNADisease
KCNMB2-AS1	Non-small cell lung cancer	qPCR; Microarray	non-small cell lung cancer tissue	Tumor vs Normal	up-regulated	25394782	Lnc2Cancer
LINC00261	Non-small cell lung cancer	qPCR; Microarray	non-small cell lung cancer tissue	Tumor vs Normal	down-regulated	25590602	Lnc2Cancer
LINC00312	Non-small cell lung cancer	qPCR; Microarray	non-small cell lung cancer tissue	Tumor vs Normal	down-regulated	25590602	Lnc2Cancer
LINC00342	Non-small cell lung cancer	qPCR; RNAi; Western blot; Microarray	non-small cell lung cancer tissue; A549 cell line	High stage vs Low stage	up-regulated	27299310	Lnc2Cancer; LncRNADisease
LINC00342	Non-small cell lung cancer	qPCR; RNAi; Western blot; Microarray	non-small cell lung cancer tissue; A549 cell line	Tumor vs Normal	up-regulated	27299310	Lnc2Cancer; LncRNADisease
LINC00673	Non-small cell lung cancer	qPCR; Microarray	non-small cell lung cancer tissue	Tumor vs Normal	up-regulated	25590602	Lnc2Cancer
LINC00673	Non-small cell lung cancer	qPCR; Microarray	non-small cell lung cancer tissue; A549, SPC-A1, PC9, H1299, H1975, H1703 cell line	Tumor vs Normal	up-regulated	27027352	Lnc2Cancer
LINC00880	Non-small cell lung cancer	qPCR	non-small cell lung cancer tissue	Tumor vs Normal	up-regulated	27322209	Lnc2Cancer
LINC01627	Non-small cell lung cancer	qPCR; Microarray	non-small cell lung cancer tissue	Tumor vs Normal	up-regulated	26393913	Lnc2Cancer; LncRNADisease
LINC01628	Non-small cell lung cancer	qPCR	non-small cell lung cancer tissue	Tumor vs Normal	up-regulated	26393913	Lnc2Cancer
LINC01852	Non-small cell lung cancer	FCM; qPCR; Western blot	SK-MES-1, SPC-A1, A549, NCI-H1975, 16HBE cell line	Tumor vs Normal	down-regulated	26883250	Lnc2Cancer
MALA-1?	Non-small cell lung cancer	qPCR; RNAi	A549, H157, H226, H460, HCC827 cell line	Tumor vs Normal	up-regulated	26493997	Lnc2Cancer
MEG3	Non-small cell lung cancer	qPCR; Western blot	non-small cell lung cancer tissue; A549, SPC-A1, NCI-H1650, NCI-H358, NCI-H1299, NCI-H1975 cell line	Tumor vs Normal	down-regulated	24098911	Lnc2Cancer; LncRNADisease
NEAT1	Non-small cell lung cancer	Dual Luciferase reporter assay; qPCR; Western blot	non-small cell lung cancer tissue	Tumor vs Normal	up-regulated	25854373	Lnc2Cancer; LncRNADisease
NEAT1	Non-small cell lung cancer	Dual Luciferase reporter assay; qPCR; Western blot	non-small cell lung cancer tissue; A549, SPC-A1, H1299, 95D, SK-MES-1, NCI-H520 cell line	Tumor vs Normal	up-regulated	27351135	Lnc2Cancer; LncRNADisease
PANDAR	Non-small cell lung cancer	qPCR; RIP; Western blot	non-small cell lung cancer tissue; A549, SPC-A1, NCI-H1299, SK-MES-1 cell line	Tumor vs Normal	down-regulated	25719249	Lnc2Cancer; LncRNADisease; MNDR
PCAT6	Non-small cell lung cancer	qPCR	non-small cell lung cancer tissue	Tumor vs Normal	up-regulated	27322209	Lnc2Cancer
PVT1	Non-small cell lung cancer	qPCR; RNAi	non-small cell lung cancer tissue; A549, H157, HEK-293T cell line	Tumor vs Normal	up-regulated	25400777	Lnc2Cancer; LncRNADisease
RGMB-AS1	Non-small cell lung cancer	qPCR; Western blot; Microarray	non-small cell lung cancer tissue; A549, SPC-A-1 cell line	Tumor vs Normal	up-regulated	26055877	Lnc2Cancer; LncRNADisease
SBF2-AS1	Non-small cell lung cancer	qPCR; RIP; RNAi; Western blot	non-small cell lung cancer tissue; A549, NCI-H1975, NCI-H358, NCI-H1299, SPC-A1 cell line	High stage vs Low stage	up-regulated	27154193	Lnc2Cancer; LncRNADisease
SBF2-AS1	Non-small cell lung cancer	qPCR; RIP; RNAi; Western blot	non-small cell lung cancer tissue; A549, NCI-H1975, NCI-H358, NCI-H1299, SPC-A1 cell line	Tumor vs Normal	up-regulated	27154193	Lnc2Cancer; LncRNADisease
Snhg1	Non-small cell lung cancer	qPCR; RNAi	NL9980, L9981, A549, H1299, H460, SK-MES-1 cell line	Tumor vs Normal	up-regulated	25818744	Lnc2Cancer; LncRNADisease
TP73-AS1	Non-small cell lung cancer	qPCR; Microarray	non-small cell lung cancer tissue	Tumor vs Normal	down-regulated	25590602	Lnc2Cancer
TUBA4B?	Non-small cell lung cancer	qPCR	non-small cell lung cancer tissue	Tumor vs Normal	up-regulated	25394782	Lnc2Cancer
TUG1	Non-small cell lung cancer	Luciferase reporter assay; qPCR; RNAi; Western blot	A549, SK-MES-1, NCI-H1299 cell line	Tumor vs Normal	down-regulated	24853421	Lnc2Cancer
TUSC7	Non-small cell lung cancer	qPCR	non-small cell lung cancer tissue; A549, H1299, H1650, H1975, H23, H358 cell line	High stage vs Low stage	down-regulated	27158360	Lnc2Cancer; LncRNADisease
TUSC7	Non-small cell lung cancer	qPCR	non-small cell lung cancer tissue; A549, H1299, H1650, H1975, H23, H358 cell line	Tumor vs Normal	down-regulated	27158360	Lnc2Cancer; LncRNADisease
UCA1	Non-small cell lung cancer	qPCR	non-small cell lung cancer tissue	Tumor vs Normal	up-regulated	26380024	Lnc2Cancer; LncRNADisease
XIST	Non-small cell lung cancer	qPCR	non-small cell lung cancer tissue	Tumor vs Normal	up-regulated	26339353	Lnc2Cancer; LncRNADisease
AC000061.1	Lung adenocarcinoma	qPCR; Microarray	lung adenocarcinoma tissue	Tumor vs Normal	down-regulated	25758555	Lnc2Cancer
ACTA2-AS1	Lung adenocarcinoma	qPCR; RNAi; Microarray	lung adenocarcinoma tissue; A549 cell line	Tumor vs Normal	up-regulated	24721325	Lnc2Cancer; LncRNADisease
CCAT2	Lung adenocarcinoma	qPCR; RNAi	lung adenocarcinoma tissue; A549, NCI-H1975, NCI-H358, NCI-H1650, NCI-H1299, SK-MES-1 cell line	Tumor vs Normal	up-regulated	24504682	Lnc2Cancer; LncRNADisease
DLX6-AS1	Lung adenocarcinoma	qPCR; Western blot; Microarray	lung adenocarcinoma tissue; A549, H1650 cell line	Tumor vs Normal	up-regulated	26052251	Lnc2Cancer; LncRNADisease
GAS5	Lung adenocarcinoma	qPCR; Western blot	lung adenocarcinoma tissue; A549, H1299, H1975, HCC827 cell line	High grade vs Low grade	down-regulated	25925741	Lnc2Cancer; LncRNADisease
GAS5	Lung adenocarcinoma	qPCR; Western blot	lung adenocarcinoma tissue; A549, H1299, H1975, HCC827 cell line	High stage vs Low stage	down-regulated	25925741	Lnc2Cancer; LncRNADisease
GAS5	Lung adenocarcinoma	qPCR; Western blot	lung adenocarcinoma tissue; A549, H1299, H1975, HCC827 cell line	Tumor vs Normal	down-regulated	25925741	Lnc2Cancer; LncRNADisease
H19	Lung adenocarcinoma	qPCR; Microarray	lung adenocarcinoma tissue	Tumor vs Normal	down-regulated	25758555	Lnc2Cancer
HNF1A-AS1	Lung adenocarcinoma	qPCR; RIP; RNAi; Western blot	lung adenocarcinoma tissue; A549, SPC-A1, H1650 cell line	Tumor vs Normal	up-regulated	25863539	Lnc2Cancer; LncRNADisease
LINC00857	Lung adenocarcinoma	qPCR; RNAi; Microarray	lung cancer tissue; H1299, H838, SK-LU-1 cell line	Tumor vs Normal	down-regulated	26862852	Lnc2Cancer
LINC01207	Lung adenocarcinoma	ChIP; qPCR; RIP; RNAi; Western blot	lung adenocarcinoma tissue; A549 cell line	High stage vs Low stage	up-regulated	26693067	Lnc2Cancer; LncRNADisease
LINC01207	Lung adenocarcinoma	ChIP; qPCR; RIP; RNAi; Western blot	lung adenocarcinoma tissue; A549 cell line	Tumor vs Normal	up-regulated	26693067	Lnc2Cancer; LncRNADisease
LINC01512	Lung adenocarcinoma	qPCR	lung adenocarcinoma tissue	Tumor vs Normal	up-regulated	25089627	Lnc2Cancer
LINC01852	Lung adenocarcinoma	qPCR; Microarray	lung adenocarcinoma tissue	Tumor vs Normal	down-regulated	25758555	Lnc2Cancer
LINC01969	Lung adenocarcinoma	qPCR; Microarray	lung adenocarcinoma tissue	Tumor vs Normal	up-regulated	25089627	Lnc2Cancer
LUADT1	Lung adenocarcinoma	FCA; qPCR; RIP; RNAi; Western blot; Microarray	lung adenocarcinoma tissue; A549, H1975, H358, H1650, H1299 cell line	Tumor vs Normal	up-regulated	26291312	Lnc2Cancer; LncRNADisease
PDLIM3	Lung adenocarcinoma	qPCR; Microarray	lung adenocarcinoma tissue	Tumor vs Normal	down-regulated	25758555	Lnc2Cancer
VNN2	Lung adenocarcinoma	qPCR; Microarray	lung adenocarcinoma tissue	Tumor vs Normal	down-regulated	25758555	Lnc2Cancer
ZNF295-AS1	Lung adenocarcinoma	qPCR; Microarray	lung adenocarcinoma tissue	Tumor vs Normal	down-regulated	25089627	Lnc2Cancer
NPTN-IT1	Squamous cell lung cancer	qPCR; RIP; Western blot	squamous cell lung cancer tissue; QSG-7701, LO2, SMMC-7721 cell line	Tumor vs Normal	down-regulated	23395002	Lnc2Cancer
SOX2-OT	Squamous cell lung cancer	qPCR; RIP; RNAi; Western blot	A549, HCC827, SK-MES-1, NCI-H1299 cell line	Tumor vs Normal	up-regulated	24927902	Lnc2Cancer
CBR3-AS1	Prostate cancer	qPCR	LNCaP, PC-3, C4-2 cell line	Tumor vs Normal	up-regulated	22264502	Lnc2Cancer; MNDR; LncRNADisease
CCAT1	Prostate cancer	ISH; qPCR	primary prostate cancer tissue	Tumor vs Normal	up-regulated	24594601	Lnc2Cancer
CTBP1-AS	Prostate cancer	Northern blot; qPCR; RIP; Western blot	prostate cancer tissue; VCaP, LNCaP, DU145, RWPE cell line	Tumor vs Normal	up-regulated	23644382	Lnc2Cancer; LncRNADisease
DANCR	Prostate cancer	ChIP; qPCR; RNAi; Western blot	prostate cancer tissue; LNCaP, CWR22Rv1, PC3 cell line	Tumor vs Normal	up-regulated	23728290	Lnc2Cancer
DANCR	Prostate cancer	ChIP; qPCR; RNAi; Western blot	prostate cancer tissue; CWR22Rv1, PC-3, C4-2B cell line	Tumor vs Normal	up-regulated	27191265	Lnc2Cancer; LncRNADisease
EGOT	Prostate cancer	Northern blot; qPCR; RNAi; Microarray; RNA-seq	prostate cancer tissue; LNCaP, CWR22Rv1, PC3 cell line	Tumor vs Normal	down-regulated	23728290	Lnc2Cancer
GAS5	Prostate cancer	Northern blot; qPCR; RNAi; Microarray; RNA-seq	prostate cancer tissue; LNCaP, CWR22Rv1, PC3 cell line	Tumor vs Normal	up-regulated	23728290	Lnc2Cancer
H19	Prostate cancer	qPCR	Du-145, PC-3 cell line	Tumor vs Normal	down-regulated	24063685	Lnc2Cancer
H19	Prostate cancer	qPCR	P69, M12 cell line	Metastasis vs Primary	down-regulated	24988946	Lnc2Cancer; LncRNADisease
HOTAIR	Prostate cancer	ChIP; qPCR; RIP; RNA pull-down assay	prostate cancer tissue; LNCaP, PC3, DU145, RWPE-1 cell line	Tumor vs Normal	up-regulated	23936419	Lnc2Cancer; LncRNADisease
HOTTIP	Prostate cancer	Northern blot; qPCR; RNAi; Microarray; RNA-seq	prostate cancer tissue; LNCaP, CWR22Rv1, PC3 cell line	Tumor vs Normal	down-regulated	23728290	Lnc2Cancer
HULC	Prostate cancer	Northern blot; qPCR; RNAi; Microarray; RNA-seq	prostate cancer tissue; LNCaP, CWR22Rv1, PC3 cell line	Tumor vs Normal	up-regulated	23728290	Lnc2Cancer
KCNQ1OT1	Prostate cancer	Northern blot; qPCR; RNAi; Microarray; RNA-seq	prostate cancer tissue; LNCaP, CWR22Rv1, PC3 cell line	Tumor vs Normal	up-regulated	23728290	Lnc2Cancer
LINC01564	Prostate cancer	qPCR; RNAi; Microarray	urine, PC3, LNCaP cell line	Tumor vs Normal	up-regulated	25513185	Lnc2Cancer
MALAT1	Prostate cancer	ChIP; qPCR; RNAi; RIP-Seq	prostate cancer tissue; LNCap-AD, 22Rv1, PC-3, DU145, C4-2 cell line	Tumor vs Normal	up-regulated	23726266	Lnc2Cancer; LncRNADisease
MALAT1	Prostate cancer	ChIP; qPCR; RNAi; RIP-Seq	prostate cancer tissue; 22RV1, LNCAP-AI cell line	High grade vs Low grade	up-regulated	23845456	Lnc2Cancer; LncRNADisease
MALAT1	Prostate cancer	ChIP; qPCR; RNAi; RIP-Seq	prostate cancer tissue; 22RV1, LNCAP-AI cell line	Tumor vs Normal	up-regulated	23845456	Lnc2Cancer; LncRNADisease
MALAT1	Prostate cancer	ChIP; qPCR; RNAi; RIP-Seq	prostate cancer tissue	Tumor vs Normal	up-regulated	27143813	MNDR
MEG3	Prostate cancer	FCM; qPCR; RNAi; Western blot	prostate cancer tissue	Tumor vs Normal	down-regulated	14602737	Lnc2Cancer
MEG3	Prostate cancer	FCM; qPCR; RNAi; Western blot	prostate cancer tissue; LNCaP, CWR22Rv1, PC3 cell line	Tumor vs Normal	down-regulated	23728290	Lnc2Cancer
MEG3	Prostate cancer	FCM; qPCR; RNAi; Western blot	prostate cancer tissue; PC3, Du145 cell line	Tumor vs Normal	down-regulated	26610246	Lnc2Cancer; LncRNADisease
NEAT1	Prostate cancer	ChIP; qPCR; RNA-seq	prostate cancer tissue; LNCaP, CWR22Rv1, PC3 cell line	Tumor vs Normal	up-regulated	23728290	Lnc2Cancer
NEAT1	Prostate cancer	ChIP; qPCR; RNA-seq	prostate cancer tissue; LnCaP, PC3 cell line	Tumor vs Normal	up-regulated	25415230	Lnc2Cancer; LncRNADisease
PCAT1	Prostate cancer	Luciferase reporter assay; qPCR; RNAi; Western blot; Microarray	prostate cancer cell line	High stage vs Low stage	up-regulated	22664915	MNDR
PCAT1	Prostate cancer	Luciferase reporter assay; qPCR; RNAi; Western blot; Microarray	prostate cancer cell line	Metastasis vs Primary	up-regulated	22664915	MNDR
PCAT1	Prostate cancer	Luciferase reporter assay; qPCR; RNAi; Western blot; Microarray	prostate cancer tissue; LNCaP, CWR22Rv1, PC3 cell line	Tumor vs Normal	up-regulated	23728290	Lnc2Cancer
PCAT18	Prostate cancer	qPCR; RNAi; Microarray	LTL313B, LTL313H cell line	Tumor vs Normal	up-regulated	24519926	Lnc2Cancer; LncRNADisease
PCAT6	Prostate cancer	Northern blot; qPCR; RNAi; Microarray; RNA-seq	prostate cancer tissue; LNCaP, CWR22Rv1, PC3 cell line	Tumor vs Normal	up-regulated	23728290	Lnc2Cancer
PCAT7	Prostate cancer	Northern blot; qPCR; RNAi; Microarray; RNA-seq	prostate cancer tissue; LNCaP, CWR22Rv1, PC3 cell line	Tumor vs Normal	up-regulated	23728290	Lnc2Cancer
PCGEM1	Prostate cancer	FISH; ISH; Northern blot; qPCR	prostate cancer tissue; LNCaP, DU145, PC-3 cell line	Tumor vs Normal	up-regulated	11050243	Lnc2Cancer; LncRNADisease
PCGEM1	Prostate cancer	FISH; ISH; Northern blot; qPCR	prostate cancer tissue; LNCaP, CWR22Rv1, PC3 cell line	Tumor vs Normal	up-regulated	23728290	Lnc2Cancer
PCGEM1	Prostate cancer	FISH; ISH; Northern blot; qPCR	prostate cancer tissue; LNCaP, LNCaP-cds1, LNCaP-cds2, CWR22Rv1 cell line	Tumor vs Normal	up-regulated	23945587	Lnc2Cancer
POU5F1P4	Prostate cancer	qPCR	prostate cancer tissue	Tumor vs Normal	up-regulated	20017164	Lnc2Cancer
PRNCR1	Prostate cancer	Northern blot; qPCR	prostate cancer tissue; LNCaP, LNCaP-cds1, LNCaP-cds2, CWR22Rv1 cell line	Tumor vs Normal	up-regulated	23945587	Lnc2Cancer
PVT1	Prostate cancer	ChIP; qPCR	prostate cancer tissue; LNCaP, CWR22Rv1, PC3 cell line	Tumor vs Normal	up-regulated	23728290	Lnc2Cancer
SCHLAP1	Prostate cancer	qPCR; RNA-seq	prostate cancer tissue	Metastasis vs Primary	up-regulated	25456366	Lnc2Cancer
SMKR1	Prostate cancer	qPCR; RNAi; Microarray	urine, PC3, LNCaP cell line	Tumor vs Normal	up-regulated	25513185	Lnc2Cancer
SRA1	Prostate cancer	Luciferase reporter assay; qPCR	prostate cancer cell line	Tumor vs Normal	up-regulated	17710122	MNDR
THBS4	Prostate cancer	qPCR; RNAi; Western blot	prostate cancer tissue; DU145, PC-3 cell line	Tumor vs Normal	up-regulated	27357608	Lnc2Cancer
TRPM2-AS	Prostate cancer	qPCR; Microarray	prostate cancer tissue; PNT1A, PC3 cell line	Tumor vs Normal	up-regulated	24931166	Lnc2Cancer; LncRNADisease
UCA1	Prostate cancer	Northern blot; qPCR; RNAi; Microarray; RNA-seq	prostate cancer tissue; 22RV1, PC3, LNCaP cell line	Tumor vs Normal	up-regulated	26550172	Lnc2Cancer; LncRNADisease
UCA1	Prostate cancer	Northern blot; qPCR; RNAi; Microarray; RNA-seq	LNCaP, PC-3, DU145 cell line	Tumor vs Normal	up-regulated	28337266	MNDR
XIST	Prostate cancer	qRT-PCR	prostate carcinoma tissue	Tumor vs Normal	up-regulated	16261845	MNDR
XLOC_007697	Prostate cancer	qPCR; RNAi; Microarray	urine, PC3, LNCaP cell line	Tumor vs Normal	up-regulated	25513185	Lnc2Cancer
XLOC_008559	Prostate cancer	qPCR; RNAi; Microarray	urine, PC3, LNCaP cell line	Tumor vs Normal	up-regulated	25513185	Lnc2Cancer
XLOC_009911	Prostate cancer	qPCR; RNAi; Microarray	urine, PC3, LNCaP cell line	Tumor vs Normal	up-regulated	25513185	Lnc2Cancer
BCYRN1	Ovarian cancer	ISH; Northern hybridization	ovarian cancer tissue	Tumor vs Normal	up-regulated	9422992	Lnc2Cancer; LncRNADisease
BCYRN1	Ovarian cancer	ISH; Northern hybridization	ovarian carcinoma cell line	Tumor vs Normal	down-regulated	18006640	MNDR
BCYRN1	Ovarian cancer	ISH; Northern hybridization	SKOV3, A2780 cell line	Tumor vs Normal	down-regulated	26893717	Lnc2Cancer
CARS2	Ovarian cancer	qPCR; Western blot; RNA-seq	A2780, A2780-DR cell line	Cisplatin resistant vs Cisplatin sensitive	up-regulated	27193186	Lnc2Cancer
CCAT1	Ovarian cancer	qPCR; Microarray	ovarian cancer tissue; SKOV3, SKOV3.ip1 cell line	Metastasis vs Primary	down-regulated	24379988	Lnc2Cancer
CCAT2	Ovarian cancer	MTT assay; qPCR; RNAi	ovarian cancer tissue; SKOV3, IGROV1, A2780, OVCAR3 cell line	Tumor vs Normal	up-regulated	27283598	Lnc2Cancer; LncRNADisease
CDKN2B-AS1	Ovarian cancer	qPCR; Western blot	SKOV3, OVCAR3, A2780, Hey, OVCA429, OVCA433 cell line	High grade vs Low grade	up-regulated	27095571	Lnc2Cancer
CDKN2B-AS1	Ovarian cancer	qPCR; Western blot	SKOV3, OVCAR3, A2780, Hey, OVCA429, OVCA433 cell line	High stage vs Low stage	up-regulated	27095571	Lnc2Cancer
CDKN2B-AS1	Ovarian cancer	qPCR; Western blot	SKOV3, OVCAR3, A2780, Hey, OVCA429, OVCA433 cell line	Tumor vs Normal	up-regulated	27095571	Lnc2Cancer
ERLNC1	Ovarian cancer	qPCR; Microarray	epithelial ovarian cancer tissue; SKOV3 cell line	Tumor vs Normal	up-regulated	24481591	Lnc2Cancer
GAS5	Ovarian cancer	qPCR; RNAi; Microarray	epithelial ovarian cancer tissue; HO8910, A2780 cell line	Tumor vs Normal	down-regulated	26503132	Lnc2Cancer; LncRNADisease
H19	Ovarian cancer	ISH	epithelial ovarian cancer cell line	Tumor vs Normal	up-regulated	10428315	MNDR
H19	Ovarian cancer	qPCR; Microarray	ovarian cancer tissue; SKOV3, SKOV3.ip1 cell line	Metastasis vs Primary	down-regulated	24379988	Lnc2Cancer
H19	Ovarian cancer	qPCR; Microarray	A2780, A2780-DR cell line	Cisplatin resistant vs Cisplatin sensitive	up-regulated	27193186	Lnc2Cancer
HOTAIR	Ovarian cancer	Luciferase reporter assay; qPCR	ovarian cancer tissue	High grade vs Low grade	up-regulated	23600210	Lnc2Cancer; LncRNADisease
HOTAIR	Ovarian cancer	Luciferase reporter assay; qPCR	ovarian cancer tissue	Tumor vs Normal	up-regulated	23600210	Lnc2Cancer; LncRNADisease
HOTAIR	Ovarian cancer	Luciferase reporter assay; qPCR	epithelial ovarian cancer tissue; SKOV3, SKOV3.ip1 cell line	Tumor vs Normal	up-regulated	24662839	Lnc2Cancer
HOTAIR	Ovarian cancer	qPCR; RNAi	A2780, Hey, SKOV3, OVCA429, OVCA433, OVCAR3 cell line	High stage vs Low stage	up-regulated	25796453	Lnc2Cancer; LncRNADisease
HOTAIR	Ovarian cancer	qPCR; RNAi	A2780, Hey, SKOV3, OVCA429, OVCA433, OVCAR3 cell line	High grade vs Low grade	up-regulated	25796453	Lnc2Cancer; LncRNADisease
HOTAIR	Ovarian cancer	qPCR; RNAi	A2780, Hey, SKOV3, OVCA429, OVCA433, OVCAR3 cell line	Tumor vs Normal	up-regulated	25796453	Lnc2Cancer; LncRNADisease
HOXA11-AS	Ovarian cancer	qPCR; Western blot	ovarian cancer tissue	Tumor vs Normal	down-regulated	26430965	Lnc2Cancer; LncRNADisease
LINC00515	Ovarian cancer	qPCR; Western blot; RNA-seq	A2780, A2780-DR cell line	Cisplatin resistant vs Cisplatin sensitive	down-regulated	27193186	Lnc2Cancer
LINC00942	Ovarian cancer	qPCR	ovarian cancer tissue; SKOV3,SKOV3.ip1 cell line	Metastasis vs Primary	down-regulated	24379988	Lnc2Cancer
LSINCT5	Ovarian cancer	Immunoblot	OVCAR5, NHBE cell line	Tumor vs Normal	up-regulated	21532345	Lnc2Cancer; LncRNADisease
LUCAT1	Ovarian cancer	qPCR; Western blot; RNA-seq	A2780, A2780-DR cell line	Cisplatin resistant vs Cisplatin sensitive	up-regulated	27193186	Lnc2Cancer
MALAT1	Ovarian cancer	FCM; qPCR; Western blot	ovarian carcinoma cell line	Tumor vs Normal	up-regulated	18006640	MNDR
MALAT1	Ovarian cancer	FCM; qPCR; Western blot	ovarian cancer tissue; SKOV3, SKOV3.ip1 cell line	Metastasis vs Primary	down-regulated	24379988	Lnc2Cancer
MALAT1	Ovarian cancer	FCM; qPCR; Western blot	ovarian cancer tissue; OVCAR3, SKOV3 cell line	Tumor vs Normal	up-regulated	27227769	Lnc2Cancer; LncRNADisease
MEG3	Ovarian cancer	Luciferase reporter assay; MSP; qPCR; Western blot	epithelial ovarian cancer tissue; OVCAR3, SKOV3, HP8910, ES-2 cell line	Tumor vs Normal	down-regulated	24859196	Lnc2Cancer; LncRNADisease
MNX1-AS1	Ovarian cancer	qPCR; Microarray	ovarian cancer tissue; SKOV3, SKOV3.ip1 cell line	Metastasis vs Primary	down-regulated	24379988	Lnc2Cancer
NEAT1	Ovarian cancer	Luciferase reporter assay; qPCR; Western blot	ovarian carcinoma cell line	Tumor vs Normal	up-regulated	21532345	MNDR
NEAT1	Ovarian cancer	Luciferase reporter assay; qPCR; Western blot	Ovarian cancer tissue	Tumor vs Normal	up-regulated	27075229	Lnc2Cancer; LncRNADisease
OVAAL	Ovarian cancer	qPCR; RNA-seq	ovarian cancer tissue	Tumor vs Normal	down-regulated	24265805	Lnc2Cancer
RECK	Ovarian cancer	qPCR; Western blot; RNA-seq	A2780, A2780-DR cell line	Cisplatin resistant vs Cisplatin sensitive	up-regulated	27193186	Lnc2Cancer
SPAAR	Ovarian cancer	qPCR; Western blot; RNA-seq	A2780, A2780-DR cell line	Cisplatin resistant vs Cisplatin sensitive	up-regulated	27193186	Lnc2Cancer
TNFRSF19	Ovarian cancer	qPCR; Western blot; RNA-seq	A2780, A2780-DR cell line	Cisplatin resistant vs Cisplatin sensitive	down-regulated	27193186	Lnc2Cancer
UCA1	Ovarian cancer	qPCR; Microarray	ovarian cancer tissue; SKOV3, SKOV3.ip1 cell line	Metastasis vs Primary	down-regulated	24379988	Lnc2Cancer
VPS9D1-AS1	Ovarian cancer	qPCR	ovarian cancer tissue; SKOV3,SKOV3.ip1 etc. cell line	Metastasis vs Primary	down-regulated	24379988	Lnc2Cancer
XIST	Ovarian cancer	qPCR; Microarray	ovarian cancer tissue; NOSE, EOC cell line	Tumor vs Normal	down-regulated	17143508	Lnc2Cancer
XIST	Ovarian cancer	qPCR; Microarray	ovarian carcinoma cell line	Tumor vs Normal	down-regulated	18006640	MNDR
CDKN2B-AS1	Serous ovarian cancer	qPCR; RNAi; Western blot	serous ovarian cancer tissue; SK-OV-3, HO8910 cell line	High stage vs Low stage	up-regulated	25845387	Lnc2Cancer
CDKN2B-AS1	Serous ovarian cancer	qPCR; RNAi; Western blot	serous ovarian cancer tissue; SK-OV-3, HO8910 cell line	High grade vs Low grade	up-regulated	25845387	Lnc2Cancer
CDKN2B-AS1	Serous ovarian cancer	qPCR; RNAi; Western blot	serous ovarian cancer tissue; SK-OV-3, HO8910 cell line	Tumor vs Normal	up-regulated	25845387	Lnc2Cancer
AC012312.1	Endometrioid carcinoma	qPCR; Microarray	endometrioid carcinoma tissue	Tumor vs Normal	down-regulated	26131074	Lnc2Cancer
GAS5	Endometrioid carcinoma	FCM; Luciferase reporter assay; qPCR; RNAi; Western blot	endometrioid carcinoma tissue; HHUA, JEC cell line	Tumor vs Normal	down-regulated	26511107	Lnc2Cancer
HAND2-AS1	Endometrioid carcinoma	qPCR; Microarray	endometrioid carcinoma tissue	Tumor vs Normal	down-regulated	26131074	Lnc2Cancer
HOTAIR	Endometrioid carcinoma	qPCR	endometrioid carcinoma tissue	Tumor vs Normal	up-regulated	24285342	Lnc2Cancer
HOTAIR	Endometrioid carcinoma	qPCR	endometrioid carcinoma tissue; HEC-1A, HEC-1B, Ishikawa, RL-952 cell line	Tumor vs Normal	up-regulated	24758900	Lnc2Cancer
SNHG12	Endometrioid carcinoma	qPCR; Microarray	endometrioid carcinoma tissue	Tumor vs Normal	up-regulated	25695231	Lnc2Cancer
