# Supplementary material for: lnCAR: A Comprehensive Resource for lncRNAs from Cancer Arrays
Source: Oxford University Press journal article supplement (doi:10.1158/0008-5472.can-18-2169), 2019-02-20
Supplement: 00085472can182169-sup-205230_3_supp_5304839_ply323.xlsx [file 00085472can182169-sup-205230_3_supp_5304839_ply323.xlsx]

## Sheet: Table S5
Table S5 Sample and clinical information of all the datasets used for survival analysis
AnalysisID	Platform	Study	Sample	Cancer	Cancer subtype	Survival type	Event	Time(days)
BT_O1	GPL13667	GSE65095	GSM1587035	Breast cancer	Invasive ductal carcinoma	Overall survival	0	1326
BT_O1	GPL13667	GSE65095	GSM1587037	Breast cancer	Invasive ductal carcinoma	Overall survival	1	2450
BT_O1	GPL13667	GSE65095	GSM1587038	Breast cancer	Invasive ductal carcinoma	Overall survival	1	2447
BT_O1	GPL13667	GSE65095	GSM1587039	Breast cancer	Invasive ductal carcinoma	Overall survival	1	2447
BT_O1	GPL13667	GSE65095	GSM1587040	Breast cancer	Invasive ductal carcinoma	Overall survival	1	2432
BT_O1	GPL13667	GSE65095	GSM1587041	Breast cancer	Invasive ductal carcinoma	Overall survival	1	2432
BT_O1	GPL13667	GSE65095	GSM1587042	Breast cancer	Invasive ductal carcinoma	Overall survival	1	2429
BT_O1	GPL13667	GSE65095	GSM1587043	Breast cancer	Invasive ductal carcinoma	Overall survival	1	2428
BT_O1	GPL13667	GSE65095	GSM1587044	Breast cancer	Invasive ductal carcinoma	Overall survival	1	2419
BT_O1	GPL13667	GSE65095	GSM1587045	Breast cancer	Invasive ductal carcinoma	Overall survival	1	2414
BT_O1	GPL13667	GSE65095	GSM1587046	Breast cancer	Invasive ductal carcinoma	Overall survival	0	1259
BT_O1	GPL13667	GSE65095	GSM1587047	Breast cancer	Invasive ductal carcinoma	Overall survival	0	782
BT_O1	GPL13667	GSE65095	GSM1587048	Breast cancer	Invasive ductal carcinoma	Overall survival	1	2391
BT_O1	GPL13667	GSE65095	GSM1587049	Breast cancer	Invasive ductal carcinoma	Overall survival	1	2386
BT_O1	GPL13667	GSE65095	GSM1587051	Breast cancer	Invasive ductal carcinoma	Overall survival	1	2371
BT_O1	GPL13667	GSE65095	GSM1587053	Breast cancer	Invasive ductal carcinoma	Overall survival	1	2362
BT_O1	GPL13667	GSE65095	GSM1587055	Breast cancer	Invasive ductal carcinoma	Overall survival	1	2359
BT_O1	GPL13667	GSE65095	GSM1587056	Breast cancer	Invasive ductal carcinoma	Overall survival	1	2358
BT_O1	GPL13667	GSE65095	GSM1587057	Breast cancer	Invasive ductal carcinoma	Overall survival	1	2356
BT_O1	GPL13667	GSE65095	GSM1587058	Breast cancer	Invasive ductal carcinoma	Overall survival	0	980
BT_O1	GPL13667	GSE65095	GSM1587059	Breast cancer	Invasive ductal carcinoma	Overall survival	1	2350
BT_O1	GPL13667	GSE65095	GSM1587060	Breast cancer	Invasive ductal carcinoma	Overall survival	1	2345
BT_O1	GPL13667	GSE65095	GSM1587061	Breast cancer	Invasive ductal carcinoma	Overall survival	1	2344
BT_O1	GPL13667	GSE65095	GSM1587062	Breast cancer	Invasive ductal carcinoma	Overall survival	1	2345
BT_O1	GPL13667	GSE65095	GSM1587063	Breast cancer	Invasive ductal carcinoma	Overall survival	0	1856
BT_O1	GPL13667	GSE65095	GSM1587064	Breast cancer	Invasive ductal carcinoma	Overall survival	1	2336
BT_O1	GPL13667	GSE65095	GSM1587065	Breast cancer	Invasive ductal carcinoma	Overall survival	1	2328
BT_O1	GPL13667	GSE65095	GSM1587066	Breast cancer	Invasive ductal carcinoma	Overall survival	1	2328
BT_O1	GPL13667	GSE65095	GSM1587067	Breast cancer	Invasive ductal carcinoma	Overall survival	0	1369
BT_O1	GPL13667	GSE65095	GSM1587068	Breast cancer	Invasive ductal carcinoma	Overall survival	0	496
BT_O1	GPL13667	GSE65095	GSM1587069	Breast cancer	Invasive ductal carcinoma	Overall survival	1	2323
BT_O1	GPL13667	GSE65095	GSM1587070	Breast cancer	Invasive ductal carcinoma	Overall survival	0	1519
BT_O1	GPL13667	GSE65095	GSM1587071	Breast cancer	Invasive ductal carcinoma	Overall survival	1	2320
BT_O1	GPL13667	GSE65095	GSM1587072	Breast cancer	Invasive ductal carcinoma	Overall survival	1	2320
BT_O1	GPL13667	GSE65095	GSM1587073	Breast cancer	Invasive ductal carcinoma	Overall survival	1	2316
BT_O1	GPL13667	GSE65095	GSM1587075	Breast cancer	Invasive ductal carcinoma	Overall survival	1	2306
BT_O1	GPL13667	GSE65095	GSM1587076	Breast cancer	Invasive ductal carcinoma	Overall survival	1	2306
BT_O1	GPL13667	GSE65095	GSM1587077	Breast cancer	Invasive ductal carcinoma	Overall survival	0	287
BT_O1	GPL13667	GSE65095	GSM1587078	Breast cancer	Invasive ductal carcinoma	Overall survival	1	2301
BT_O1	GPL13667	GSE65095	GSM1587080	Breast cancer	Invasive ductal carcinoma	Overall survival	1	2289
BT_O1	GPL13667	GSE65095	GSM1587081	Breast cancer	Invasive ductal carcinoma	Overall survival	1	2228
BT_O1	GPL13667	GSE65095	GSM1587082	Breast cancer	Invasive ductal carcinoma	Overall survival	1	2285
BT_O1	GPL13667	GSE65095	GSM1587084	Breast cancer	Invasive ductal carcinoma	Overall survival	0	369
BT_O1	GPL13667	GSE65095	GSM1587085	Breast cancer	Invasive ductal carcinoma	Overall survival	1	2274
BT_O1	GPL13667	GSE65095	GSM1587086	Breast cancer	Invasive ductal carcinoma	Overall survival	1	2273
BT_O1	GPL13667	GSE65095	GSM1587087	Breast cancer	Invasive ductal carcinoma	Overall survival	1	2273
BT_O1	GPL13667	GSE65095	GSM1587088	Breast cancer	Invasive ductal carcinoma	Overall survival	1	2259
BT_O1	GPL13667	GSE65095	GSM1587089	Breast cancer	Invasive ductal carcinoma	Overall survival	1	2258
BT_O1	GPL13667	GSE65095	GSM1587090	Breast cancer	Invasive ductal carcinoma	Overall survival	1	2258
BT_O1	GPL13667	GSE65095	GSM1587091	Breast cancer	Invasive ductal carcinoma	Overall survival	1	2257
BT_O1	GPL13667	GSE65095	GSM1587092	Breast cancer	Invasive ductal carcinoma	Overall survival	1	2210
BT_O1	GPL13667	GSE65095	GSM1587093	Breast cancer	Invasive ductal carcinoma	Overall survival	1	2188
BT_O1	GPL13667	GSE65095	GSM1587094	Breast cancer	Invasive ductal carcinoma	Overall survival	1	2184
BT_O1	GPL13667	GSE65095	GSM1587095	Breast cancer	Invasive ductal carcinoma	Overall survival	1	2182
BT_O1	GPL13667	GSE65095	GSM1587096	Breast cancer	Invasive ductal carcinoma	Overall survival	1	2181
BT_O1	GPL13667	GSE65095	GSM1587097	Breast cancer	Invasive ductal carcinoma	Overall survival	1	2177
BT_O1	GPL13667	GSE65095	GSM1587098	Breast cancer	Invasive ductal carcinoma	Overall survival	1	2177
BT_O1	GPL13667	GSE65095	GSM1587099	Breast cancer	Invasive ductal carcinoma	Overall survival	1	2175
BT_O1	GPL13667	GSE65095	GSM1587100	Breast cancer	Invasive ductal carcinoma	Overall survival	1	2175
BT_O1	GPL13667	GSE65095	GSM1587101	Breast cancer	Invasive ductal carcinoma	Overall survival	1	2170
BT_O1	GPL13667	GSE65095	GSM1587102	Breast cancer	Invasive ductal carcinoma	Overall survival	0	2157
BT_O1	GPL13667	GSE65095	GSM1587103	Breast cancer	Invasive ductal carcinoma	Overall survival	1	2167
BT_O1	GPL13667	GSE65095	GSM1587104	Breast cancer	Invasive ductal carcinoma	Overall survival	1	2163
BT_O1	GPL13667	GSE65095	GSM1587105	Breast cancer	Invasive ductal carcinoma	Overall survival	1	2154
BT_O1	GPL13667	GSE65095	GSM1587106	Breast cancer	Invasive ductal carcinoma	Overall survival	1	2146
BT_O1	GPL13667	GSE65095	GSM1587107	Breast cancer	Invasive ductal carcinoma	Overall survival	0	623
BT_O1	GPL13667	GSE65095	GSM1587108	Breast cancer	Invasive ductal carcinoma	Overall survival	1	2125
BT_O1	GPL13667	GSE65095	GSM1587109	Breast cancer	Invasive ductal carcinoma	Overall survival	1	2120
BT_O1	GPL13667	GSE65095	GSM1587110	Breast cancer	Invasive ductal carcinoma	Overall survival	1	2099
BT_O1	GPL13667	GSE65095	GSM1587111	Breast cancer	Invasive ductal carcinoma	Overall survival	1	2114
BT_O1	GPL13667	GSE65095	GSM1587112	Breast cancer	Invasive ductal carcinoma	Overall survival	1	2105
BT_O1	GPL13667	GSE65095	GSM1587113	Breast cancer	Invasive ductal carcinoma	Overall survival	1	2075
BT_O1	GPL13667	GSE65095	GSM1587114	Breast cancer	Invasive ductal carcinoma	Overall survival	0	1802
BT_O1	GPL13667	GSE65095	GSM1587115	Breast cancer	Invasive ductal carcinoma	Overall survival	1	2083
BT_O1	GPL13667	GSE65095	GSM1587116	Breast cancer	Invasive ductal carcinoma	Overall survival	1	2073
BT_O1	GPL13667	GSE65095	GSM1587117	Breast cancer	Invasive ductal carcinoma	Overall survival	1	2071
BT_O1	GPL13667	GSE65095	GSM1587118	Breast cancer	Invasive ductal carcinoma	Overall survival	1	2010
BT_O1	GPL13667	GSE65095	GSM1587119	Breast cancer	Invasive ductal carcinoma	Overall survival	1	2065
BT_O1	GPL13667	GSE65095	GSM1587120	Breast cancer	Invasive ductal carcinoma	Overall survival	1	2048
BT_O1	GPL13667	GSE65095	GSM1587121	Breast cancer	Invasive ductal carcinoma	Overall survival	1	2042
BT_O1	GPL13667	GSE65095	GSM1587122	Breast cancer	Invasive ductal carcinoma	Overall survival	1	2042
BT_O1	GPL13667	GSE65095	GSM1587123	Breast cancer	Invasive ductal carcinoma	Overall survival	1	2029
BT_O1	GPL13667	GSE65095	GSM1587124	Breast cancer	Invasive ductal carcinoma	Overall survival	1	2020
BT_O1	GPL13667	GSE65095	GSM1587126	Breast cancer	Invasive ductal carcinoma	Overall survival	1	2003
BT_O1	GPL13667	GSE65095	GSM1587127	Breast cancer	Invasive ductal carcinoma	Overall survival	0	1436
BT_O1	GPL13667	GSE65095	GSM1587128	Breast cancer	Invasive ductal carcinoma	Overall survival	1	2000
BT_O1	GPL13667	GSE65095	GSM1587129	Breast cancer	Invasive ductal carcinoma	Overall survival	0	1048
BT_O1	GPL13667	GSE65095	GSM1587130	Breast cancer	Invasive ductal carcinoma	Overall survival	1	1994
BT_O1	GPL13667	GSE65095	GSM1587131	Breast cancer	Invasive ductal carcinoma	Overall survival	1	1989
BT_O1	GPL13667	GSE65095	GSM1587132	Breast cancer	Invasive ductal carcinoma	Overall survival	1	1987
BT_O1	GPL13667	GSE65095	GSM1587133	Breast cancer	Invasive ductal carcinoma	Overall survival	1	1982
BT_O1	GPL13667	GSE65095	GSM1587134	Breast cancer	Invasive ductal carcinoma	Overall survival	1	1943
BT_O1	GPL13667	GSE65095	GSM1587135	Breast cancer	Invasive ductal carcinoma	Overall survival	0	1849
BT_O1	GPL13667	GSE65095	GSM1587136	Breast cancer	Invasive ductal carcinoma	Overall survival	1	1968
BT_O1	GPL13667	GSE65095	GSM1587137	Breast cancer	Invasive ductal carcinoma	Overall survival	1	1965
BT_O1	GPL13667	GSE65095	GSM1587138	Breast cancer	Invasive ductal carcinoma	Overall survival	1	1960
BT_O1	GPL13667	GSE65095	GSM1587139	Breast cancer	Invasive ductal carcinoma	Overall survival	1	1953
BT_O1	GPL13667	GSE65095	GSM1587141	Breast cancer	Invasive ductal carcinoma	Overall survival	1	1904
BT_O1	GPL13667	GSE65095	GSM1587142	Breast cancer	Invasive ductal carcinoma	Overall survival	1	1943
BT_O1	GPL13667	GSE65095	GSM1587143	Breast cancer	Invasive ductal carcinoma	Overall survival	1	1936
BT_O1	GPL13667	GSE65095	GSM1587144	Breast cancer	Invasive ductal carcinoma	Overall survival	1	1939
BT_O1	GPL13667	GSE65095	GSM1587146	Breast cancer	Invasive ductal carcinoma	Overall survival	1	1926
BT_O1	GPL13667	GSE65095	GSM1587148	Breast cancer	Invasive ductal carcinoma	Overall survival	1	1919
BT_O1	GPL13667	GSE65095	GSM1587149	Breast cancer	Invasive ductal carcinoma	Overall survival	1	1911
BT_O1	GPL13667	GSE65095	GSM1587150	Breast cancer	Invasive ductal carcinoma	Overall survival	1	1901
BT_O1	GPL13667	GSE65095	GSM1587151	Breast cancer	Invasive ductal carcinoma	Overall survival	1	1894
BT_O1	GPL13667	GSE65095	GSM1587152	Breast cancer	Invasive ductal carcinoma	Overall survival	1	1894
BT_O1	GPL13667	GSE65095	GSM1587153	Breast cancer	Invasive ductal carcinoma	Overall survival	1	1894
BT_O1	GPL13667	GSE65095	GSM1587154	Breast cancer	Invasive ductal carcinoma	Overall survival	0	486
BT_O1	GPL13667	GSE65095	GSM1587155	Breast cancer	Invasive ductal carcinoma	Overall survival	1	1873
BT_O1	GPL13667	GSE65095	GSM1587156	Breast cancer	Invasive ductal carcinoma	Overall survival	1	1869
BT_O1	GPL13667	GSE65095	GSM1587157	Breast cancer	Invasive ductal carcinoma	Overall survival	1	1869
BT_O1	GPL13667	GSE65095	GSM1587158	Breast cancer	Invasive ductal carcinoma	Overall survival	1	1868
BT_O1	GPL13667	GSE65095	GSM1587159	Breast cancer	Invasive ductal carcinoma	Overall survival	1	1867
BT_O1	GPL13667	GSE65095	GSM1587160	Breast cancer	Invasive ductal carcinoma	Overall survival	1	1861
BT_O1	GPL13667	GSE65095	GSM1587161	Breast cancer	Invasive ductal carcinoma	Overall survival	1	1855
BT_O1	GPL13667	GSE65095	GSM1587163	Breast cancer	Invasive ductal carcinoma	Overall survival	1	1847
BT_O1	GPL13667	GSE65095	GSM1587164	Breast cancer	Invasive ductal carcinoma	Overall survival	1	1841
BT_O1	GPL13667	GSE65095	GSM1587165	Breast cancer	Invasive ductal carcinoma	Overall survival	1	1832
BT_O1	GPL13667	GSE65095	GSM1587166	Breast cancer	Invasive ductal carcinoma	Overall survival	1	1828
BT_O1	GPL13667	GSE65095	GSM1587167	Breast cancer	Invasive ductal carcinoma	Overall survival	1	1794
BT_O1	GPL13667	GSE65095	GSM1587168	Breast cancer	Invasive ductal carcinoma	Overall survival	1	1798
BT_O1	GPL13667	GSE65095	GSM1587170	Breast cancer	Invasive ductal carcinoma	Overall survival	1	1798
BT_O1	GPL13667	GSE65095	GSM1587171	Breast cancer	Invasive ductal carcinoma	Overall survival	1	1791
BT_O1	GPL13667	GSE65095	GSM1587172	Breast cancer	Invasive ductal carcinoma	Overall survival	1	1776
BT_O1	GPL13667	GSE65095	GSM1587173	Breast cancer	Invasive ductal carcinoma	Overall survival	1	1776
BT_O1	GPL13667	GSE65095	GSM1587174	Breast cancer	Invasive ductal carcinoma	Overall survival	1	1771
BT_O1	GPL13667	GSE65095	GSM1587175	Breast cancer	Invasive ductal carcinoma	Overall survival	1	1765
BT_O1	GPL13667	GSE65095	GSM1587177	Breast cancer	Invasive ductal carcinoma	Overall survival	1	1747
BT_O1	GPL13667	GSE65095	GSM1587178	Breast cancer	Invasive ductal carcinoma	Overall survival	1	1744
BT_O1	GPL13667	GSE65095	GSM1587179	Breast cancer	Invasive ductal carcinoma	Overall survival	1	1744
BT_O1	GPL13667	GSE65095	GSM1587180	Breast cancer	Invasive ductal carcinoma	Overall survival	1	1743
BT_O1	GPL13667	GSE65095	GSM1587181	Breast cancer	Invasive ductal carcinoma	Overall survival	1	1742
BT_O1	GPL13667	GSE65095	GSM1587182	Breast cancer	Invasive ductal carcinoma	Overall survival	1	1708
BT_O1	GPL13667	GSE65095	GSM1587183	Breast cancer	Invasive ductal carcinoma	Overall survival	1	1728
BT_O1	GPL13667	GSE65095	GSM1587184	Breast cancer	Invasive ductal carcinoma	Overall survival	0	47
BT_O1	GPL13667	GSE65095	GSM1587185	Breast cancer	Invasive ductal carcinoma	Overall survival	1	1720
BT_O1	GPL13667	GSE65095	GSM1587186	Breast cancer	Invasive ductal carcinoma	Overall survival	0	1403
BT_O1	GPL13667	GSE65095	GSM1587187	Breast cancer	Invasive ductal carcinoma	Overall survival	1	1714
BT_O1	GPL13667	GSE65095	GSM1587188	Breast cancer	Invasive ductal carcinoma	Overall survival	1	1705
BT_O1	GPL13667	GSE65095	GSM1587189	Breast cancer	Invasive ductal carcinoma	Overall survival	1	1705
BT_O1	GPL13667	GSE65095	GSM1587190	Breast cancer	Invasive ductal carcinoma	Overall survival	1	1701
BT_O1	GPL13667	GSE65095	GSM1587191	Breast cancer	Invasive ductal carcinoma	Overall survival	1	1701
BT_O1	GPL13667	GSE65095	GSM1587192	Breast cancer	Invasive ductal carcinoma	Overall survival	1	1701
BT_O1	GPL13667	GSE65095	GSM1587193	Breast cancer	Invasive ductal carcinoma	Overall survival	1	1672
BT_O1	GPL13667	GSE65095	GSM1587194	Breast cancer	Invasive ductal carcinoma	Overall survival	0	1067
BT_O1	GPL13667	GSE65095	GSM1587195	Breast cancer	Invasive ductal carcinoma	Overall survival	1	1652
BT_O1	GPL13667	GSE65095	GSM1587196	Breast cancer	Invasive ductal carcinoma	Overall survival	1	1646
BT_O1	GPL13667	GSE65095	GSM1587197	Breast cancer	Invasive ductal carcinoma	Overall survival	1	1645
BT_O1	GPL13667	GSE65095	GSM1587198	Breast cancer	Invasive ductal carcinoma	Overall survival	1	1621
BT_O1	GPL13667	GSE65095	GSM1587199	Breast cancer	Invasive ductal carcinoma	Overall survival	1	1642
BT_O1	GPL13667	GSE65095	GSM1587200	Breast cancer	Invasive ductal carcinoma	Overall survival	1	1639
BT_O1	GPL13667	GSE65095	GSM1587201	Breast cancer	Invasive ductal carcinoma	Overall survival	1	1638
BT_O1	GPL13667	GSE65095	GSM1587202	Breast cancer	Invasive ductal carcinoma	Overall survival	1	1636
BT_O1	GPL13667	GSE65095	GSM1587203	Breast cancer	Invasive ductal carcinoma	Overall survival	1	1632
BT_O1	GPL13667	GSE65095	GSM1587205	Breast cancer	Invasive ductal carcinoma	Overall survival	1	1618
BT_O1	GPL13667	GSE65095	GSM1587206	Breast cancer	Invasive ductal carcinoma	Overall survival	1	1625
BT_O1	GPL13667	GSE65095	GSM1587207	Breast cancer	Invasive ductal carcinoma	Overall survival	1	1613
BT_O1	GPL13667	GSE65095	GSM1587208	Breast cancer	Invasive ductal carcinoma	Overall survival	1	1616
BT_O1	GPL13667	GSE65095	GSM1587211	Breast cancer	Invasive ductal carcinoma	Overall survival	1	1596
BT_O1	GPL13667	GSE65095	GSM1587212	Breast cancer	Invasive ductal carcinoma	Overall survival	1	1575
BT_O1	GPL13667	GSE65095	GSM1587213	Breast cancer	Invasive ductal carcinoma	Overall survival	0	838
BT_O1	GPL13667	GSE65095	GSM1587214	Breast cancer	Invasive ductal carcinoma	Overall survival	1	1559
BT_O1	GPL13667	GSE65095	GSM1587215	Breast cancer	Invasive ductal carcinoma	Overall survival	1	1545
BT_O1	GPL13667	GSE65095	GSM1587216	Breast cancer	Invasive ductal carcinoma	Overall survival	1	1540
BT_O1	GPL13667	GSE65095	GSM1587217	Breast cancer	Invasive ductal carcinoma	Overall survival	0	1102
BT_O1	GPL13667	GSE65095	GSM1587221	Breast cancer	Invasive ductal carcinoma	Overall survival	1	1519
BT_O1	GPL13667	GSE65095	GSM1587222	Breast cancer	Invasive ductal carcinoma	Overall survival	1	1509
BT_O1	GPL13667	GSE65095	GSM1587223	Breast cancer	Invasive ductal carcinoma	Overall survival	1	1491
BT_O1	GPL13667	GSE65095	GSM1587224	Breast cancer	Invasive ductal carcinoma	Overall survival	1	1468
BT_O1	GPL13667	GSE65095	GSM1587225	Breast cancer	Invasive ductal carcinoma	Overall survival	1	1483
BT_O1	GPL13667	GSE65095	GSM1587227	Breast cancer	Invasive ductal carcinoma	Overall survival	1	1462
BT_O1	GPL13667	GSE65095	GSM1587228	Breast cancer	Invasive ductal carcinoma	Overall survival	1	1442
BT_O1	GPL13667	GSE65095	GSM1587229	Breast cancer	Invasive ductal carcinoma	Overall survival	1	2251
BT_O1	GPL13667	GSE65095	GSM1587230	Breast cancer	Invasive ductal carcinoma	Overall survival	1	2219
BT_O1	GPL13667	GSE65095	GSM1587231	Breast cancer	Invasive ductal carcinoma	Overall survival	0	968
BT_O1	GPL13667	GSE65095	GSM1587232	Breast cancer	Invasive ductal carcinoma	Overall survival	1	2237
BT_O1	GPL13667	GSE65095	GSM1587233	Breast cancer	Invasive ductal carcinoma	Overall survival	1	2230
BT_O1	GPL13667	GSE65095	GSM1587234	Breast cancer	Invasive ductal carcinoma	Overall survival	1	2219
BT_O1	GPL13667	GSE65095	GSM1587235	Breast cancer	Invasive ductal carcinoma	Overall survival	1	2217
BT_O1	GPL13667	GSE65095	GSM1587236	Breast cancer	Invasive ductal carcinoma	Overall survival	1	2215
BT_O1	GPL13667	GSE65095	GSM1587237	Breast cancer	Invasive ductal carcinoma	Overall survival	1	2210
BT_O2	GPL13667	GSE65095	GSM1587036	Breast cancer	Invasive lobular carcinoma	Overall survival	0	1479
BT_O2	GPL13667	GSE65095	GSM1587050	Breast cancer	Invasive lobular carcinoma	Overall survival	1	2373
BT_O2	GPL13667	GSE65095	GSM1587054	Breast cancer	Invasive lobular carcinoma	Overall survival	0	916
BT_O2	GPL13667	GSE65095	GSM1587074	Breast cancer	Invasive lobular carcinoma	Overall survival	1	2266
BT_O2	GPL13667	GSE65095	GSM1587079	Breast cancer	Invasive lobular carcinoma	Overall survival	0	884
BT_O2	GPL13667	GSE65095	GSM1587083	Breast cancer	Invasive lobular carcinoma	Overall survival	1	2280
BT_O2	GPL13667	GSE65095	GSM1587125	Breast cancer	Invasive lobular carcinoma	Overall survival	1	2017
BT_O2	GPL13667	GSE65095	GSM1587140	Breast cancer	Invasive lobular carcinoma	Overall survival	1	1953
BT_O2	GPL13667	GSE65095	GSM1587145	Breast cancer	Invasive lobular carcinoma	Overall survival	1	1930
BT_O2	GPL13667	GSE65095	GSM1587147	Breast cancer	Invasive lobular carcinoma	Overall survival	1	1792
BT_O2	GPL13667	GSE65095	GSM1587162	Breast cancer	Invasive lobular carcinoma	Overall survival	1	1854
BT_O2	GPL13667	GSE65095	GSM1587176	Breast cancer	Invasive lobular carcinoma	Overall survival	1	1765
BT_O2	GPL13667	GSE65095	GSM1587204	Breast cancer	Invasive lobular carcinoma	Overall survival	1	1631
BT_O2	GPL13667	GSE65095	GSM1587209	Breast cancer	Invasive lobular carcinoma	Overall survival	0	1514
BT_O2	GPL13667	GSE65095	GSM1587210	Breast cancer	Invasive lobular carcinoma	Overall survival	1	1601
BT_O2	GPL13667	GSE65095	GSM1587218	Breast cancer	Invasive lobular carcinoma	Overall survival	0	1152
BT_O2	GPL13667	GSE65095	GSM1587219	Breast cancer	Invasive lobular carcinoma	Overall survival	0	556
BT_O2	GPL13667	GSE65095	GSM1587220	Breast cancer	Invasive lobular carcinoma	Overall survival	1	1523
BT_O2	GPL13667	GSE65095	GSM1587226	Breast cancer	Invasive lobular carcinoma	Overall survival	1	1464
BT_O3	GPL13667	GSE65095	GSM1587035	Breast cancer	Invasive ductal carcinoma	Relapse-free survival	0	477
BT_O3	GPL13667	GSE65095	GSM1587037	Breast cancer	Invasive ductal carcinoma	Relapse-free survival	1	2450
BT_O3	GPL13667	GSE65095	GSM1587038	Breast cancer	Invasive ductal carcinoma	Relapse-free survival	1	2447
BT_O3	GPL13667	GSE65095	GSM1587039	Breast cancer	Invasive ductal carcinoma	Relapse-free survival	1	2447
BT_O3	GPL13667	GSE65095	GSM1587040	Breast cancer	Invasive ductal carcinoma	Relapse-free survival	1	2432
BT_O3	GPL13667	GSE65095	GSM1587041	Breast cancer	Invasive ductal carcinoma	Relapse-free survival	1	2432
BT_O3	GPL13667	GSE65095	GSM1587042	Breast cancer	Invasive ductal carcinoma	Relapse-free survival	1	2429
BT_O3	GPL13667	GSE65095	GSM1587043	Breast cancer	Invasive ductal carcinoma	Relapse-free survival	0	2170
BT_O3	GPL13667	GSE65095	GSM1587044	Breast cancer	Invasive ductal carcinoma	Relapse-free survival	1	2419
BT_O3	GPL13667	GSE65095	GSM1587045	Breast cancer	Invasive ductal carcinoma	Relapse-free survival	1	2414
BT_O3	GPL13667	GSE65095	GSM1587046	Breast cancer	Invasive ductal carcinoma	Relapse-free survival	0	419
BT_O3	GPL13667	GSE65095	GSM1587047	Breast cancer	Invasive ductal carcinoma	Relapse-free survival	0	765
BT_O3	GPL13667	GSE65095	GSM1587048	Breast cancer	Invasive ductal carcinoma	Relapse-free survival	1	2391
BT_O3	GPL13667	GSE65095	GSM1587049	Breast cancer	Invasive ductal carcinoma	Relapse-free survival	1	2386
BT_O3	GPL13667	GSE65095	GSM1587051	Breast cancer	Invasive ductal carcinoma	Relapse-free survival	1	2371
BT_O3	GPL13667	GSE65095	GSM1587053	Breast cancer	Invasive ductal carcinoma	Relapse-free survival	1	2362
BT_O3	GPL13667	GSE65095	GSM1587055	Breast cancer	Invasive ductal carcinoma	Relapse-free survival	1	2359
BT_O3	GPL13667	GSE65095	GSM1587056	Breast cancer	Invasive ductal carcinoma	Relapse-free survival	1	2358
BT_O3	GPL13667	GSE65095	GSM1587057	Breast cancer	Invasive ductal carcinoma	Relapse-free survival	1	2356
BT_O3	GPL13667	GSE65095	GSM1587058	Breast cancer	Invasive ductal carcinoma	Relapse-free survival	0	367
BT_O3	GPL13667	GSE65095	GSM1587059	Breast cancer	Invasive ductal carcinoma	Relapse-free survival	0	782
BT_O3	GPL13667	GSE65095	GSM1587060	Breast cancer	Invasive ductal carcinoma	Relapse-free survival	1	2345
BT_O3	GPL13667	GSE65095	GSM1587061	Breast cancer	Invasive ductal carcinoma	Relapse-free survival	1	2344
BT_O3	GPL13667	GSE65095	GSM1587062	Breast cancer	Invasive ductal carcinoma	Relapse-free survival	1	2345
BT_O3	GPL13667	GSE65095	GSM1587063	Breast cancer	Invasive ductal carcinoma	Relapse-free survival	0	648
BT_O3	GPL13667	GSE65095	GSM1587064	Breast cancer	Invasive ductal carcinoma	Relapse-free survival	1	2336
BT_O3	GPL13667	GSE65095	GSM1587065	Breast cancer	Invasive ductal carcinoma	Relapse-free survival	1	2328
BT_O3	GPL13667	GSE65095	GSM1587066	Breast cancer	Invasive ductal carcinoma	Relapse-free survival	1	2328
BT_O3	GPL13667	GSE65095	GSM1587067	Breast cancer	Invasive ductal carcinoma	Relapse-free survival	0	874
BT_O3	GPL13667	GSE65095	GSM1587068	Breast cancer	Invasive ductal carcinoma	Relapse-free survival	0	59
BT_O3	GPL13667	GSE65095	GSM1587069	Breast cancer	Invasive ductal carcinoma	Relapse-free survival	0	528
BT_O3	GPL13667	GSE65095	GSM1587070	Breast cancer	Invasive ductal carcinoma	Relapse-free survival	0	350
BT_O3	GPL13667	GSE65095	GSM1587071	Breast cancer	Invasive ductal carcinoma	Relapse-free survival	1	2320
BT_O3	GPL13667	GSE65095	GSM1587072	Breast cancer	Invasive ductal carcinoma	Relapse-free survival	1	2320
BT_O3	GPL13667	GSE65095	GSM1587073	Breast cancer	Invasive ductal carcinoma	Relapse-free survival	1	2316
BT_O3	GPL13667	GSE65095	GSM1587075	Breast cancer	Invasive ductal carcinoma	Relapse-free survival	1	2306
BT_O3	GPL13667	GSE65095	GSM1587076	Breast cancer	Invasive ductal carcinoma	Relapse-free survival	1	2306
BT_O3	GPL13667	GSE65095	GSM1587077	Breast cancer	Invasive ductal carcinoma	Relapse-free survival	0	204
BT_O3	GPL13667	GSE65095	GSM1587078	Breast cancer	Invasive ductal carcinoma	Relapse-free survival	1	2301
BT_O3	GPL13667	GSE65095	GSM1587080	Breast cancer	Invasive ductal carcinoma	Relapse-free survival	1	2289
BT_O3	GPL13667	GSE65095	GSM1587081	Breast cancer	Invasive ductal carcinoma	Relapse-free survival	1	2228
BT_O3	GPL13667	GSE65095	GSM1587082	Breast cancer	Invasive ductal carcinoma	Relapse-free survival	1	2285
BT_O3	GPL13667	GSE65095	GSM1587084	Breast cancer	Invasive ductal carcinoma	Relapse-free survival	0	324
BT_O3	GPL13667	GSE65095	GSM1587085	Breast cancer	Invasive ductal carcinoma	Relapse-free survival	1	2274
BT_O3	GPL13667	GSE65095	GSM1587086	Breast cancer	Invasive ductal carcinoma	Relapse-free survival	1	2273
BT_O3	GPL13667	GSE65095	GSM1587087	Breast cancer	Invasive ductal carcinoma	Relapse-free survival	1	2273
BT_O3	GPL13667	GSE65095	GSM1587088	Breast cancer	Invasive ductal carcinoma	Relapse-free survival	0	338
BT_O3	GPL13667	GSE65095	GSM1587089	Breast cancer	Invasive ductal carcinoma	Relapse-free survival	1	2258
BT_O3	GPL13667	GSE65095	GSM1587090	Breast cancer	Invasive ductal carcinoma	Relapse-free survival	1	2258
BT_O3	GPL13667	GSE65095	GSM1587091	Breast cancer	Invasive ductal carcinoma	Relapse-free survival	1	2257
BT_O3	GPL13667	GSE65095	GSM1587092	Breast cancer	Invasive ductal carcinoma	Relapse-free survival	1	2210
BT_O3	GPL13667	GSE65095	GSM1587093	Breast cancer	Invasive ductal carcinoma	Relapse-free survival	1	2188
BT_O3	GPL13667	GSE65095	GSM1587094	Breast cancer	Invasive ductal carcinoma	Relapse-free survival	1	2184
BT_O3	GPL13667	GSE65095	GSM1587095	Breast cancer	Invasive ductal carcinoma	Relapse-free survival	0	1525
BT_O3	GPL13667	GSE65095	GSM1587096	Breast cancer	Invasive ductal carcinoma	Relapse-free survival	1	2181
BT_O3	GPL13667	GSE65095	GSM1587097	Breast cancer	Invasive ductal carcinoma	Relapse-free survival	1	2177
BT_O3	GPL13667	GSE65095	GSM1587098	Breast cancer	Invasive ductal carcinoma	Relapse-free survival	1	2177
BT_O3	GPL13667	GSE65095	GSM1587099	Breast cancer	Invasive ductal carcinoma	Relapse-free survival	1	2175
BT_O3	GPL13667	GSE65095	GSM1587100	Breast cancer	Invasive ductal carcinoma	Relapse-free survival	1	2175
BT_O3	GPL13667	GSE65095	GSM1587101	Breast cancer	Invasive ductal carcinoma	Relapse-free survival	1	2170
BT_O3	GPL13667	GSE65095	GSM1587102	Breast cancer	Invasive ductal carcinoma	Relapse-free survival	0	2157
BT_O3	GPL13667	GSE65095	GSM1587103	Breast cancer	Invasive ductal carcinoma	Relapse-free survival	1	2167
BT_O3	GPL13667	GSE65095	GSM1587104	Breast cancer	Invasive ductal carcinoma	Relapse-free survival	1	2163
BT_O3	GPL13667	GSE65095	GSM1587105	Breast cancer	Invasive ductal carcinoma	Relapse-free survival	1	2154
BT_O3	GPL13667	GSE65095	GSM1587106	Breast cancer	Invasive ductal carcinoma	Relapse-free survival	1	2146
BT_O3	GPL13667	GSE65095	GSM1587107	Breast cancer	Invasive ductal carcinoma	Relapse-free survival	0	427
BT_O3	GPL13667	GSE65095	GSM1587108	Breast cancer	Invasive ductal carcinoma	Relapse-free survival	1	2125
BT_O3	GPL13667	GSE65095	GSM1587109	Breast cancer	Invasive ductal carcinoma	Relapse-free survival	1	2120
BT_O3	GPL13667	GSE65095	GSM1587110	Breast cancer	Invasive ductal carcinoma	Relapse-free survival	1	2099
BT_O3	GPL13667	GSE65095	GSM1587111	Breast cancer	Invasive ductal carcinoma	Relapse-free survival	1	2114
BT_O3	GPL13667	GSE65095	GSM1587112	Breast cancer	Invasive ductal carcinoma	Relapse-free survival	1	2105
BT_O3	GPL13667	GSE65095	GSM1587113	Breast cancer	Invasive ductal carcinoma	Relapse-free survival	0	1809
BT_O3	GPL13667	GSE65095	GSM1587114	Breast cancer	Invasive ductal carcinoma	Relapse-free survival	0	268
BT_O3	GPL13667	GSE65095	GSM1587115	Breast cancer	Invasive ductal carcinoma	Relapse-free survival	1	2083
BT_O3	GPL13667	GSE65095	GSM1587116	Breast cancer	Invasive ductal carcinoma	Relapse-free survival	1	2073
BT_O3	GPL13667	GSE65095	GSM1587117	Breast cancer	Invasive ductal carcinoma	Relapse-free survival	1	2071
BT_O3	GPL13667	GSE65095	GSM1587118	Breast cancer	Invasive ductal carcinoma	Relapse-free survival	0	1505
BT_O3	GPL13667	GSE65095	GSM1587119	Breast cancer	Invasive ductal carcinoma	Relapse-free survival	1	2065
BT_O3	GPL13667	GSE65095	GSM1587120	Breast cancer	Invasive ductal carcinoma	Relapse-free survival	1	2048
BT_O3	GPL13667	GSE65095	GSM1587121	Breast cancer	Invasive ductal carcinoma	Relapse-free survival	1	2042
BT_O3	GPL13667	GSE65095	GSM1587122	Breast cancer	Invasive ductal carcinoma	Relapse-free survival	1	2042
BT_O3	GPL13667	GSE65095	GSM1587123	Breast cancer	Invasive ductal carcinoma	Relapse-free survival	0	1099
BT_O3	GPL13667	GSE65095	GSM1587124	Breast cancer	Invasive ductal carcinoma	Relapse-free survival	1	2020
BT_O3	GPL13667	GSE65095	GSM1587126	Breast cancer	Invasive ductal carcinoma	Relapse-free survival	1	2003
BT_O3	GPL13667	GSE65095	GSM1587127	Breast cancer	Invasive ductal carcinoma	Relapse-free survival	0	1423
BT_O3	GPL13667	GSE65095	GSM1587128	Breast cancer	Invasive ductal carcinoma	Relapse-free survival	1	2000
BT_O3	GPL13667	GSE65095	GSM1587129	Breast cancer	Invasive ductal carcinoma	Relapse-free survival	0	523
BT_O3	GPL13667	GSE65095	GSM1587130	Breast cancer	Invasive ductal carcinoma	Relapse-free survival	1	1994
BT_O3	GPL13667	GSE65095	GSM1587131	Breast cancer	Invasive ductal carcinoma	Relapse-free survival	1	1989
BT_O3	GPL13667	GSE65095	GSM1587132	Breast cancer	Invasive ductal carcinoma	Relapse-free survival	1	1987
BT_O3	GPL13667	GSE65095	GSM1587133	Breast cancer	Invasive ductal carcinoma	Relapse-free survival	1	1982
BT_O3	GPL13667	GSE65095	GSM1587134	Breast cancer	Invasive ductal carcinoma	Relapse-free survival	1	1943
BT_O3	GPL13667	GSE65095	GSM1587135	Breast cancer	Invasive ductal carcinoma	Relapse-free survival	0	849
BT_O3	GPL13667	GSE65095	GSM1587136	Breast cancer	Invasive ductal carcinoma	Relapse-free survival	1	1968
BT_O3	GPL13667	GSE65095	GSM1587137	Breast cancer	Invasive ductal carcinoma	Relapse-free survival	1	1965
BT_O3	GPL13667	GSE65095	GSM1587138	Breast cancer	Invasive ductal carcinoma	Relapse-free survival	1	1960
BT_O3	GPL13667	GSE65095	GSM1587139	Breast cancer	Invasive ductal carcinoma	Relapse-free survival	1	1953
BT_O3	GPL13667	GSE65095	GSM1587141	Breast cancer	Invasive ductal carcinoma	Relapse-free survival	1	1904
BT_O3	GPL13667	GSE65095	GSM1587142	Breast cancer	Invasive ductal carcinoma	Relapse-free survival	1	1943
BT_O3	GPL13667	GSE65095	GSM1587143	Breast cancer	Invasive ductal carcinoma	Relapse-free survival	0	1556
BT_O3	GPL13667	GSE65095	GSM1587144	Breast cancer	Invasive ductal carcinoma	Relapse-free survival	1	1939
BT_O3	GPL13667	GSE65095	GSM1587146	Breast cancer	Invasive ductal carcinoma	Relapse-free survival	1	1926
BT_O3	GPL13667	GSE65095	GSM1587148	Breast cancer	Invasive ductal carcinoma	Relapse-free survival	1	1919
BT_O3	GPL13667	GSE65095	GSM1587149	Breast cancer	Invasive ductal carcinoma	Relapse-free survival	1	1911
BT_O3	GPL13667	GSE65095	GSM1587150	Breast cancer	Invasive ductal carcinoma	Relapse-free survival	1	1901
BT_O3	GPL13667	GSE65095	GSM1587151	Breast cancer	Invasive ductal carcinoma	Relapse-free survival	1	1894
BT_O3	GPL13667	GSE65095	GSM1587152	Breast cancer	Invasive ductal carcinoma	Relapse-free survival	0	650
BT_O3	GPL13667	GSE65095	GSM1587153	Breast cancer	Invasive ductal carcinoma	Relapse-free survival	0	1698
BT_O3	GPL13667	GSE65095	GSM1587154	Breast cancer	Invasive ductal carcinoma	Relapse-free survival	0	405
BT_O3	GPL13667	GSE65095	GSM1587155	Breast cancer	Invasive ductal carcinoma	Relapse-free survival	1	1873
BT_O3	GPL13667	GSE65095	GSM1587156	Breast cancer	Invasive ductal carcinoma	Relapse-free survival	1	1869
BT_O3	GPL13667	GSE65095	GSM1587157	Breast cancer	Invasive ductal carcinoma	Relapse-free survival	1	1869
BT_O3	GPL13667	GSE65095	GSM1587158	Breast cancer	Invasive ductal carcinoma	Relapse-free survival	1	1868
BT_O3	GPL13667	GSE65095	GSM1587159	Breast cancer	Invasive ductal carcinoma	Relapse-free survival	1	1867
BT_O3	GPL13667	GSE65095	GSM1587160	Breast cancer	Invasive ductal carcinoma	Relapse-free survival	0	1495
BT_O3	GPL13667	GSE65095	GSM1587161	Breast cancer	Invasive ductal carcinoma	Relapse-free survival	1	1855
BT_O3	GPL13667	GSE65095	GSM1587163	Breast cancer	Invasive ductal carcinoma	Relapse-free survival	1	1847
BT_O3	GPL13667	GSE65095	GSM1587164	Breast cancer	Invasive ductal carcinoma	Relapse-free survival	1	1841
BT_O3	GPL13667	GSE65095	GSM1587165	Breast cancer	Invasive ductal carcinoma	Relapse-free survival	1	1832
BT_O3	GPL13667	GSE65095	GSM1587166	Breast cancer	Invasive ductal carcinoma	Relapse-free survival	1	1828
BT_O3	GPL13667	GSE65095	GSM1587167	Breast cancer	Invasive ductal carcinoma	Relapse-free survival	1	1794
BT_O3	GPL13667	GSE65095	GSM1587168	Breast cancer	Invasive ductal carcinoma	Relapse-free survival	1	1798
BT_O3	GPL13667	GSE65095	GSM1587170	Breast cancer	Invasive ductal carcinoma	Relapse-free survival	1	1798
BT_O3	GPL13667	GSE65095	GSM1587171	Breast cancer	Invasive ductal carcinoma	Relapse-free survival	1	1791
BT_O3	GPL13667	GSE65095	GSM1587172	Breast cancer	Invasive ductal carcinoma	Relapse-free survival	1	1776
BT_O3	GPL13667	GSE65095	GSM1587173	Breast cancer	Invasive ductal carcinoma	Relapse-free survival	0	691
BT_O3	GPL13667	GSE65095	GSM1587174	Breast cancer	Invasive ductal carcinoma	Relapse-free survival	1	1771
BT_O3	GPL13667	GSE65095	GSM1587175	Breast cancer	Invasive ductal carcinoma	Relapse-free survival	0	1011
BT_O3	GPL13667	GSE65095	GSM1587177	Breast cancer	Invasive ductal carcinoma	Relapse-free survival	1	1747
BT_O3	GPL13667	GSE65095	GSM1587178	Breast cancer	Invasive ductal carcinoma	Relapse-free survival	1	1744
BT_O3	GPL13667	GSE65095	GSM1587179	Breast cancer	Invasive ductal carcinoma	Relapse-free survival	1	1744
BT_O3	GPL13667	GSE65095	GSM1587180	Breast cancer	Invasive ductal carcinoma	Relapse-free survival	1	1743
BT_O3	GPL13667	GSE65095	GSM1587181	Breast cancer	Invasive ductal carcinoma	Relapse-free survival	1	1742
BT_O3	GPL13667	GSE65095	GSM1587182	Breast cancer	Invasive ductal carcinoma	Relapse-free survival	0	1211
BT_O3	GPL13667	GSE65095	GSM1587183	Breast cancer	Invasive ductal carcinoma	Relapse-free survival	1	1728
BT_O3	GPL13667	GSE65095	GSM1587184	Breast cancer	Invasive ductal carcinoma	Relapse-free survival	0	47
BT_O3	GPL13667	GSE65095	GSM1587185	Breast cancer	Invasive ductal carcinoma	Relapse-free survival	1	1720
BT_O3	GPL13667	GSE65095	GSM1587186	Breast cancer	Invasive ductal carcinoma	Relapse-free survival	0	1231
BT_O3	GPL13667	GSE65095	GSM1587187	Breast cancer	Invasive ductal carcinoma	Relapse-free survival	1	1714
BT_O3	GPL13667	GSE65095	GSM1587188	Breast cancer	Invasive ductal carcinoma	Relapse-free survival	1	1705
BT_O3	GPL13667	GSE65095	GSM1587189	Breast cancer	Invasive ductal carcinoma	Relapse-free survival	1	1705
BT_O3	GPL13667	GSE65095	GSM1587190	Breast cancer	Invasive ductal carcinoma	Relapse-free survival	1	1701
BT_O3	GPL13667	GSE65095	GSM1587191	Breast cancer	Invasive ductal carcinoma	Relapse-free survival	1	1701
BT_O3	GPL13667	GSE65095	GSM1587192	Breast cancer	Invasive ductal carcinoma	Relapse-free survival	0	367
BT_O3	GPL13667	GSE65095	GSM1587193	Breast cancer	Invasive ductal carcinoma	Relapse-free survival	1	1672
BT_O3	GPL13667	GSE65095	GSM1587194	Breast cancer	Invasive ductal carcinoma	Relapse-free survival	0	1031
BT_O3	GPL13667	GSE65095	GSM1587195	Breast cancer	Invasive ductal carcinoma	Relapse-free survival	1	1652
BT_O3	GPL13667	GSE65095	GSM1587196	Breast cancer	Invasive ductal carcinoma	Relapse-free survival	1	1646
BT_O3	GPL13667	GSE65095	GSM1587197	Breast cancer	Invasive ductal carcinoma	Relapse-free survival	1	1645
BT_O3	GPL13667	GSE65095	GSM1587198	Breast cancer	Invasive ductal carcinoma	Relapse-free survival	1	1621
BT_O3	GPL13667	GSE65095	GSM1587199	Breast cancer	Invasive ductal carcinoma	Relapse-free survival	1	1642
BT_O3	GPL13667	GSE65095	GSM1587200	Breast cancer	Invasive ductal carcinoma	Relapse-free survival	1	1639
BT_O3	GPL13667	GSE65095	GSM1587201	Breast cancer	Invasive ductal carcinoma	Relapse-free survival	0	1165
BT_O3	GPL13667	GSE65095	GSM1587202	Breast cancer	Invasive ductal carcinoma	Relapse-free survival	1	1636
BT_O3	GPL13667	GSE65095	GSM1587203	Breast cancer	Invasive ductal carcinoma	Relapse-free survival	1	1632
BT_O3	GPL13667	GSE65095	GSM1587205	Breast cancer	Invasive ductal carcinoma	Relapse-free survival	0	769
BT_O3	GPL13667	GSE65095	GSM1587206	Breast cancer	Invasive ductal carcinoma	Relapse-free survival	1	1625
BT_O3	GPL13667	GSE65095	GSM1587207	Breast cancer	Invasive ductal carcinoma	Relapse-free survival	0	1535
BT_O3	GPL13667	GSE65095	GSM1587208	Breast cancer	Invasive ductal carcinoma	Relapse-free survival	1	1616
BT_O3	GPL13667	GSE65095	GSM1587211	Breast cancer	Invasive ductal carcinoma	Relapse-free survival	1	1596
BT_O3	GPL13667	GSE65095	GSM1587212	Breast cancer	Invasive ductal carcinoma	Relapse-free survival	1	1575
BT_O3	GPL13667	GSE65095	GSM1587213	Breast cancer	Invasive ductal carcinoma	Relapse-free survival	0	484
BT_O3	GPL13667	GSE65095	GSM1587214	Breast cancer	Invasive ductal carcinoma	Relapse-free survival	1	1559
BT_O3	GPL13667	GSE65095	GSM1587215	Breast cancer	Invasive ductal carcinoma	Relapse-free survival	1	1545
BT_O3	GPL13667	GSE65095	GSM1587216	Breast cancer	Invasive ductal carcinoma	Relapse-free survival	1	1540
BT_O3	GPL13667	GSE65095	GSM1587217	Breast cancer	Invasive ductal carcinoma	Relapse-free survival	0	400
BT_O3	GPL13667	GSE65095	GSM1587221	Breast cancer	Invasive ductal carcinoma	Relapse-free survival	0	1128
BT_O3	GPL13667	GSE65095	GSM1587222	Breast cancer	Invasive ductal carcinoma	Relapse-free survival	1	1509
BT_O3	GPL13667	GSE65095	GSM1587223	Breast cancer	Invasive ductal carcinoma	Relapse-free survival	1	1491
BT_O3	GPL13667	GSE65095	GSM1587224	Breast cancer	Invasive ductal carcinoma	Relapse-free survival	1	1468
BT_O3	GPL13667	GSE65095	GSM1587225	Breast cancer	Invasive ductal carcinoma	Relapse-free survival	1	1483
BT_O3	GPL13667	GSE65095	GSM1587227	Breast cancer	Invasive ductal carcinoma	Relapse-free survival	1	1462
BT_O3	GPL13667	GSE65095	GSM1587228	Breast cancer	Invasive ductal carcinoma	Relapse-free survival	1	1442
BT_O3	GPL13667	GSE65095	GSM1587229	Breast cancer	Invasive ductal carcinoma	Relapse-free survival	1	2251
BT_O3	GPL13667	GSE65095	GSM1587230	Breast cancer	Invasive ductal carcinoma	Relapse-free survival	1	2219
BT_O3	GPL13667	GSE65095	GSM1587231	Breast cancer	Invasive ductal carcinoma	Relapse-free survival	0	747
BT_O3	GPL13667	GSE65095	GSM1587232	Breast cancer	Invasive ductal carcinoma	Relapse-free survival	1	2237
BT_O3	GPL13667	GSE65095	GSM1587233	Breast cancer	Invasive ductal carcinoma	Relapse-free survival	0	836
BT_O3	GPL13667	GSE65095	GSM1587234	Breast cancer	Invasive ductal carcinoma	Relapse-free survival	1	2219
BT_O3	GPL13667	GSE65095	GSM1587235	Breast cancer	Invasive ductal carcinoma	Relapse-free survival	1	2217
BT_O3	GPL13667	GSE65095	GSM1587236	Breast cancer	Invasive ductal carcinoma	Relapse-free survival	1	2215
BT_O3	GPL13667	GSE65095	GSM1587237	Breast cancer	Invasive ductal carcinoma	Relapse-free survival	1	2210
BT_O4	GPL13667	GSE65095	GSM1587036	Breast cancer	Invasive lobular carcinoma	Relapse-free survival	0	858
BT_O4	GPL13667	GSE65095	GSM1587050	Breast cancer	Invasive lobular carcinoma	Relapse-free survival	1	2373
BT_O4	GPL13667	GSE65095	GSM1587054	Breast cancer	Invasive lobular carcinoma	Relapse-free survival	0	585
BT_O4	GPL13667	GSE65095	GSM1587074	Breast cancer	Invasive lobular carcinoma	Relapse-free survival	0	321
BT_O4	GPL13667	GSE65095	GSM1587079	Breast cancer	Invasive lobular carcinoma	Relapse-free survival	0	385
BT_O4	GPL13667	GSE65095	GSM1587083	Breast cancer	Invasive lobular carcinoma	Relapse-free survival	1	2280
BT_O4	GPL13667	GSE65095	GSM1587125	Breast cancer	Invasive lobular carcinoma	Relapse-free survival	1	2017
BT_O4	GPL13667	GSE65095	GSM1587140	Breast cancer	Invasive lobular carcinoma	Relapse-free survival	0	703
BT_O4	GPL13667	GSE65095	GSM1587145	Breast cancer	Invasive lobular carcinoma	Relapse-free survival	1	1930
BT_O4	GPL13667	GSE65095	GSM1587147	Breast cancer	Invasive lobular carcinoma	Relapse-free survival	1	1792
BT_O4	GPL13667	GSE65095	GSM1587162	Breast cancer	Invasive lobular carcinoma	Relapse-free survival	1	1854
BT_O4	GPL13667	GSE65095	GSM1587176	Breast cancer	Invasive lobular carcinoma	Relapse-free survival	1	1765
BT_O4	GPL13667	GSE65095	GSM1587204	Breast cancer	Invasive lobular carcinoma	Relapse-free survival	1	1631
BT_O4	GPL13667	GSE65095	GSM1587209	Breast cancer	Invasive lobular carcinoma	Relapse-free survival	0	969
BT_O4	GPL13667	GSE65095	GSM1587210	Breast cancer	Invasive lobular carcinoma	Relapse-free survival	1	1601
BT_O4	GPL13667	GSE65095	GSM1587218	Breast cancer	Invasive lobular carcinoma	Relapse-free survival	0	1069
BT_O4	GPL13667	GSE65095	GSM1587219	Breast cancer	Invasive lobular carcinoma	Relapse-free survival	0	334
BT_O4	GPL13667	GSE65095	GSM1587220	Breast cancer	Invasive lobular carcinoma	Relapse-free survival	1	1523
BT_O4	GPL13667	GSE65095	GSM1587226	Breast cancer	Invasive lobular carcinoma	Relapse-free survival	1	1464
BT_O7	GPL571	GSE69031	GSM1690440	Breast cancer	Breast cancer	Overall survival	1	2234
BT_O7	GPL571	GSE69031	GSM1690441	Breast cancer	Breast cancer	Overall survival	0	1069
BT_O7	GPL571	GSE69031	GSM1690442	Breast cancer	Breast cancer	Overall survival	1	496
BT_O7	GPL571	GSE69031	GSM1690443	Breast cancer	Breast cancer	Overall survival	1	3040
BT_O7	GPL571	GSE69031	GSM1690444	Breast cancer	Breast cancer	Overall survival	1	3504
BT_O7	GPL571	GSE69031	GSM1690445	Breast cancer	Breast cancer	Overall survival	1	1814
BT_O7	GPL571	GSE69031	GSM1690446	Breast cancer	Breast cancer	Overall survival	0	314
BT_O7	GPL571	GSE69031	GSM1690447	Breast cancer	Breast cancer	Overall survival	0	551
BT_O7	GPL571	GSE69031	GSM1690448	Breast cancer	Breast cancer	Overall survival	0	1288
BT_O7	GPL571	GSE69031	GSM1690449	Breast cancer	Breast cancer	Overall survival	1	2456
BT_O7	GPL571	GSE69031	GSM1690450	Breast cancer	Breast cancer	Overall survival	1	3781
BT_O7	GPL571	GSE69031	GSM1690451	Breast cancer	Breast cancer	Overall survival	1	3683
BT_O7	GPL571	GSE69031	GSM1690452	Breast cancer	Breast cancer	Overall survival	1	4300
BT_O7	GPL571	GSE69031	GSM1690453	Breast cancer	Breast cancer	Overall survival	0	818
BT_O7	GPL571	GSE69031	GSM1690454	Breast cancer	Breast cancer	Overall survival	1	4665
BT_O7	GPL571	GSE69031	GSM1690455	Breast cancer	Breast cancer	Overall survival	1	4052
BT_O7	GPL571	GSE69031	GSM1690456	Breast cancer	Breast cancer	Overall survival	1	2727
BT_O7	GPL571	GSE69031	GSM1690457	Breast cancer	Breast cancer	Overall survival	1	1059
BT_O7	GPL571	GSE69031	GSM1690458	Breast cancer	Breast cancer	Overall survival	0	905
BT_O7	GPL571	GSE69031	GSM1690459	Breast cancer	Breast cancer	Overall survival	1	3457
BT_O7	GPL571	GSE69031	GSM1690460	Breast cancer	Breast cancer	Overall survival	0	1708
BT_O7	GPL571	GSE69031	GSM1690461	Breast cancer	Breast cancer	Overall survival	1	4132
BT_O7	GPL571	GSE69031	GSM1690462	Breast cancer	Breast cancer	Overall survival	0	4219
BT_O7	GPL571	GSE69031	GSM1690463	Breast cancer	Breast cancer	Overall survival	0	245
BT_O7	GPL571	GSE69031	GSM1690464	Breast cancer	Breast cancer	Overall survival	0	818
BT_O7	GPL571	GSE69031	GSM1690465	Breast cancer	Breast cancer	Overall survival	0	1223
BT_O7	GPL571	GSE69031	GSM1690466	Breast cancer	Breast cancer	Overall survival	1	3336
BT_O7	GPL571	GSE69031	GSM1690467	Breast cancer	Breast cancer	Overall survival	0	2040
BT_O7	GPL571	GSE69031	GSM1690468	Breast cancer	Breast cancer	Overall survival	1	902
BT_O7	GPL571	GSE69031	GSM1690469	Breast cancer	Breast cancer	Overall survival	1	5183
BT_O7	GPL571	GSE69031	GSM1690470	Breast cancer	Breast cancer	Overall survival	0	672
BT_O7	GPL571	GSE69031	GSM1690471	Breast cancer	Breast cancer	Overall survival	0	1091
BT_O7	GPL571	GSE69031	GSM1690472	Breast cancer	Breast cancer	Overall survival	1	3814
BT_O7	GPL571	GSE69031	GSM1690473	Breast cancer	Breast cancer	Overall survival	0	1507
BT_O7	GPL571	GSE69031	GSM1690474	Breast cancer	Breast cancer	Overall survival	1	2986
BT_O7	GPL571	GSE69031	GSM1690475	Breast cancer	Breast cancer	Overall survival	1	2949
BT_O7	GPL571	GSE69031	GSM1690476	Breast cancer	Breast cancer	Overall survival	0	2113
BT_O7	GPL571	GSE69031	GSM1690477	Breast cancer	Breast cancer	Overall survival	1	3745
BT_O7	GPL571	GSE69031	GSM1690478	Breast cancer	Breast cancer	Overall survival	1	3760
BT_O7	GPL571	GSE69031	GSM1690479	Breast cancer	Breast cancer	Overall survival	1	3723
BT_O7	GPL571	GSE69031	GSM1690480	Breast cancer	Breast cancer	Overall survival	1	767
BT_O7	GPL571	GSE69031	GSM1690481	Breast cancer	Breast cancer	Overall survival	0	584
BT_O7	GPL571	GSE69031	GSM1690482	Breast cancer	Breast cancer	Overall survival	0	219
BT_O7	GPL571	GSE69031	GSM1690483	Breast cancer	Breast cancer	Overall survival	0	376
BT_O7	GPL571	GSE69031	GSM1690484	Breast cancer	Breast cancer	Overall survival	1	4365
BT_O7	GPL571	GSE69031	GSM1690485	Breast cancer	Breast cancer	Overall survival	1	2055
BT_O7	GPL571	GSE69031	GSM1690486	Breast cancer	Breast cancer	Overall survival	1	2467
BT_O7	GPL571	GSE69031	GSM1690487	Breast cancer	Breast cancer	Overall survival	1	3643
BT_O7	GPL571	GSE69031	GSM1690488	Breast cancer	Breast cancer	Overall survival	1	5165
BT_O7	GPL571	GSE69031	GSM1690489	Breast cancer	Breast cancer	Overall survival	1	898
BT_O7	GPL571	GSE69031	GSM1690490	Breast cancer	Breast cancer	Overall survival	1	2197
BT_O7	GPL571	GSE69031	GSM1690491	Breast cancer	Breast cancer	Overall survival	1	3219
BT_O7	GPL571	GSE69031	GSM1690492	Breast cancer	Breast cancer	Overall survival	1	1000
BT_O7	GPL571	GSE69031	GSM1690493	Breast cancer	Breast cancer	Overall survival	1	1580
BT_O7	GPL571	GSE69031	GSM1690494	Breast cancer	Breast cancer	Overall survival	1	1518
BT_O7	GPL571	GSE69031	GSM1690495	Breast cancer	Breast cancer	Overall survival	1	2048
BT_O7	GPL571	GSE69031	GSM1690496	Breast cancer	Breast cancer	Overall survival	0	2033
BT_O7	GPL571	GSE69031	GSM1690497	Breast cancer	Breast cancer	Overall survival	1	3362
BT_O7	GPL571	GSE69031	GSM1690498	Breast cancer	Breast cancer	Overall survival	0	1248
BT_O7	GPL571	GSE69031	GSM1690499	Breast cancer	Breast cancer	Overall survival	1	2924
BT_O7	GPL571	GSE69031	GSM1690500	Breast cancer	Breast cancer	Overall survival	1	1602
BT_O7	GPL571	GSE69031	GSM1690501	Breast cancer	Breast cancer	Overall survival	1	3763
BT_O7	GPL571	GSE69031	GSM1690502	Breast cancer	Breast cancer	Overall survival	0	383
BT_O7	GPL571	GSE69031	GSM1690503	Breast cancer	Breast cancer	Overall survival	1	4698
BT_O7	GPL571	GSE69031	GSM1690504	Breast cancer	Breast cancer	Overall survival	0	1475
BT_O7	GPL571	GSE69031	GSM1690505	Breast cancer	Breast cancer	Overall survival	0	2646
BT_O7	GPL571	GSE69031	GSM1690506	Breast cancer	Breast cancer	Overall survival	1	3106
BT_O7	GPL571	GSE69031	GSM1690507	Breast cancer	Breast cancer	Overall survival	0	887
BT_O7	GPL571	GSE69031	GSM1690508	Breast cancer	Breast cancer	Overall survival	1	3628
BT_O7	GPL571	GSE69031	GSM1690509	Breast cancer	Breast cancer	Overall survival	1	3376
BT_O7	GPL571	GSE69031	GSM1690510	Breast cancer	Breast cancer	Overall survival	0	1460
BT_O7	GPL571	GSE69031	GSM1690511	Breast cancer	Breast cancer	Overall survival	0	2588
BT_O7	GPL571	GSE69031	GSM1690512	Breast cancer	Breast cancer	Overall survival	1	3913
BT_O7	GPL571	GSE69031	GSM1690513	Breast cancer	Breast cancer	Overall survival	0	1194
BT_O7	GPL571	GSE69031	GSM1690514	Breast cancer	Breast cancer	Overall survival	1	157
BT_O7	GPL571	GSE69031	GSM1690515	Breast cancer	Breast cancer	Overall survival	1	2759
BT_O7	GPL571	GSE69031	GSM1690516	Breast cancer	Breast cancer	Overall survival	0	1380
BT_O7	GPL571	GSE69031	GSM1690517	Breast cancer	Breast cancer	Overall survival	1	1719
BT_O7	GPL571	GSE69031	GSM1690518	Breast cancer	Breast cancer	Overall survival	0	2070
BT_O7	GPL571	GSE69031	GSM1690519	Breast cancer	Breast cancer	Overall survival	1	489
BT_O7	GPL571	GSE69031	GSM1690520	Breast cancer	Breast cancer	Overall survival	1	3252
BT_O7	GPL571	GSE69031	GSM1690521	Breast cancer	Breast cancer	Overall survival	0	2796
BT_O7	GPL571	GSE69031	GSM1690522	Breast cancer	Breast cancer	Overall survival	1	2310
BT_O7	GPL571	GSE69031	GSM1690523	Breast cancer	Breast cancer	Overall survival	0	2387
BT_O7	GPL571	GSE69031	GSM1690524	Breast cancer	Breast cancer	Overall survival	0	4117
BT_O7	GPL571	GSE69031	GSM1690525	Breast cancer	Breast cancer	Overall survival	1	3774
BT_O7	GPL571	GSE69031	GSM1690526	Breast cancer	Breast cancer	Overall survival	1	3322
BT_O7	GPL571	GSE69031	GSM1690527	Breast cancer	Breast cancer	Overall survival	1	2059
BT_O7	GPL571	GSE69031	GSM1690528	Breast cancer	Breast cancer	Overall survival	1	3059
BT_O7	GPL571	GSE69031	GSM1690529	Breast cancer	Breast cancer	Overall survival	1	3504
BT_O7	GPL571	GSE69031	GSM1690530	Breast cancer	Breast cancer	Overall survival	0	383
BT_O7	GPL571	GSE69031	GSM1690531	Breast cancer	Breast cancer	Overall survival	1	1117
BT_O7	GPL571	GSE69031	GSM1690532	Breast cancer	Breast cancer	Overall survival	0	1621
BT_O7	GPL571	GSE69031	GSM1690533	Breast cancer	Breast cancer	Overall survival	0	1088
BT_O7	GPL571	GSE69031	GSM1690534	Breast cancer	Breast cancer	Overall survival	0	920
BT_O7	GPL571	GSE69031	GSM1690535	Breast cancer	Breast cancer	Overall survival	1	4008
BT_O7	GPL571	GSE69031	GSM1690536	Breast cancer	Breast cancer	Overall survival	1	1632
BT_O7	GPL571	GSE69031	GSM1690537	Breast cancer	Breast cancer	Overall survival	1	4008
BT_O7	GPL571	GSE69031	GSM1690538	Breast cancer	Breast cancer	Overall survival	1	2081
BT_O7	GPL571	GSE69031	GSM1690539	Breast cancer	Breast cancer	Overall survival	1	1927
BT_O7	GPL571	GSE69031	GSM1690540	Breast cancer	Breast cancer	Overall survival	1	4143
BT_O7	GPL571	GSE69031	GSM1690541	Breast cancer	Breast cancer	Overall survival	1	3289
BT_O7	GPL571	GSE69031	GSM1690542	Breast cancer	Breast cancer	Overall survival	1	2869
BT_O7	GPL571	GSE69031	GSM1690543	Breast cancer	Breast cancer	Overall survival	1	150
BT_O7	GPL571	GSE69031	GSM1690544	Breast cancer	Breast cancer	Overall survival	0	861
BT_O7	GPL571	GSE69031	GSM1690545	Breast cancer	Breast cancer	Overall survival	1	3584
BT_O7	GPL571	GSE69031	GSM1690546	Breast cancer	Breast cancer	Overall survival	0	719
BT_O7	GPL571	GSE69031	GSM1690547	Breast cancer	Breast cancer	Overall survival	0	748
BT_O7	GPL571	GSE69031	GSM1690548	Breast cancer	Breast cancer	Overall survival	1	412
BT_O7	GPL571	GSE69031	GSM1690549	Breast cancer	Breast cancer	Overall survival	0	2084
BT_O7	GPL571	GSE69031	GSM1690550	Breast cancer	Breast cancer	Overall survival	0	1405
BT_O7	GPL571	GSE69031	GSM1690551	Breast cancer	Breast cancer	Overall survival	1	2533
BT_O7	GPL571	GSE69031	GSM1690552	Breast cancer	Breast cancer	Overall survival	1	3544
BT_O7	GPL571	GSE69031	GSM1690553	Breast cancer	Breast cancer	Overall survival	1	3113
BT_O7	GPL571	GSE69031	GSM1690554	Breast cancer	Breast cancer	Overall survival	1	3577
BT_O7	GPL571	GSE69031	GSM1690555	Breast cancer	Breast cancer	Overall survival	1	1602
BT_O7	GPL571	GSE69031	GSM1690556	Breast cancer	Breast cancer	Overall survival	1	4143
BT_O7	GPL571	GSE69031	GSM1690557	Breast cancer	Breast cancer	Overall survival	1	2497
BT_O7	GPL571	GSE69031	GSM1690558	Breast cancer	Breast cancer	Overall survival	0	2102
BT_O7	GPL571	GSE69031	GSM1690559	Breast cancer	Breast cancer	Overall survival	1	4143
BT_O7	GPL571	GSE69031	GSM1690560	Breast cancer	Breast cancer	Overall survival	1	245
BT_O7	GPL571	GSE69031	GSM1690561	Breast cancer	Breast cancer	Overall survival	1	47
BT_O7	GPL571	GSE69031	GSM1690562	Breast cancer	Breast cancer	Overall survival	1	5019
BT_O7	GPL571	GSE69031	GSM1690563	Breast cancer	Breast cancer	Overall survival	1	2884
BT_O7	GPL571	GSE69031	GSM1690564	Breast cancer	Breast cancer	Overall survival	0	2183
BT_O7	GPL571	GSE69031	GSM1690565	Breast cancer	Breast cancer	Overall survival	1	3139
BT_O7	GPL571	GSE69031	GSM1690567	Breast cancer	Breast cancer	Overall survival	1	3270
BT_O7	GPL571	GSE69031	GSM1690568	Breast cancer	Breast cancer	Overall survival	1	4103
BT_O7	GPL571	GSE69031	GSM1690569	Breast cancer	Breast cancer	Overall survival	0	1099
BT_O8	GPL571	GSE69031	GSM1690440	Breast cancer	Breast cancer	Relapse-free survival	0	2234
BT_O8	GPL571	GSE69031	GSM1690441	Breast cancer	Breast cancer	Relapse-free survival	1	124
BT_O8	GPL571	GSE69031	GSM1690442	Breast cancer	Breast cancer	Relapse-free survival	0	496
BT_O8	GPL571	GSE69031	GSM1690443	Breast cancer	Breast cancer	Relapse-free survival	1	1121
BT_O8	GPL571	GSE69031	GSM1690444	Breast cancer	Breast cancer	Relapse-free survival	0	3504
BT_O8	GPL571	GSE69031	GSM1690445	Breast cancer	Breast cancer	Relapse-free survival	0	1814
BT_O8	GPL571	GSE69031	GSM1690446	Breast cancer	Breast cancer	Relapse-free survival	1	314
BT_O8	GPL571	GSE69031	GSM1690447	Breast cancer	Breast cancer	Relapse-free survival	0	551
BT_O8	GPL571	GSE69031	GSM1690448	Breast cancer	Breast cancer	Relapse-free survival	1	573
BT_O8	GPL571	GSE69031	GSM1690449	Breast cancer	Breast cancer	Relapse-free survival	0	2456
BT_O8	GPL571	GSE69031	GSM1690450	Breast cancer	Breast cancer	Relapse-free survival	0	3781
BT_O8	GPL571	GSE69031	GSM1690451	Breast cancer	Breast cancer	Relapse-free survival	0	3683
BT_O8	GPL571	GSE69031	GSM1690452	Breast cancer	Breast cancer	Relapse-free survival	0	4300
BT_O8	GPL571	GSE69031	GSM1690453	Breast cancer	Breast cancer	Relapse-free survival	1	482
BT_O8	GPL571	GSE69031	GSM1690454	Breast cancer	Breast cancer	Relapse-free survival	0	4665
BT_O8	GPL571	GSE69031	GSM1690455	Breast cancer	Breast cancer	Relapse-free survival	0	4052
BT_O8	GPL571	GSE69031	GSM1690456	Breast cancer	Breast cancer	Relapse-free survival	0	2727
BT_O8	GPL571	GSE69031	GSM1690457	Breast cancer	Breast cancer	Relapse-free survival	0	1059
BT_O8	GPL571	GSE69031	GSM1690458	Breast cancer	Breast cancer	Relapse-free survival	1	905
BT_O8	GPL571	GSE69031	GSM1690459	Breast cancer	Breast cancer	Relapse-free survival	0	3457
BT_O8	GPL571	GSE69031	GSM1690461	Breast cancer	Breast cancer	Relapse-free survival	0	4132
BT_O8	GPL571	GSE69031	GSM1690462	Breast cancer	Breast cancer	Relapse-free survival	0	3165
BT_O8	GPL571	GSE69031	GSM1690463	Breast cancer	Breast cancer	Relapse-free survival	1	245
BT_O8	GPL571	GSE69031	GSM1690464	Breast cancer	Breast cancer	Relapse-free survival	1	420
BT_O8	GPL571	GSE69031	GSM1690465	Breast cancer	Breast cancer	Relapse-free survival	1	1051
BT_O8	GPL571	GSE69031	GSM1690466	Breast cancer	Breast cancer	Relapse-free survival	0	3336
BT_O8	GPL571	GSE69031	GSM1690468	Breast cancer	Breast cancer	Relapse-free survival	1	777
BT_O8	GPL571	GSE69031	GSM1690469	Breast cancer	Breast cancer	Relapse-free survival	0	5183
BT_O8	GPL571	GSE69031	GSM1690470	Breast cancer	Breast cancer	Relapse-free survival	0	672
BT_O8	GPL571	GSE69031	GSM1690471	Breast cancer	Breast cancer	Relapse-free survival	1	770
BT_O8	GPL571	GSE69031	GSM1690472	Breast cancer	Breast cancer	Relapse-free survival	0	3814
BT_O8	GPL571	GSE69031	GSM1690473	Breast cancer	Breast cancer	Relapse-free survival	1	128
BT_O8	GPL571	GSE69031	GSM1690474	Breast cancer	Breast cancer	Relapse-free survival	0	2986
BT_O8	GPL571	GSE69031	GSM1690475	Breast cancer	Breast cancer	Relapse-free survival	0	2949
BT_O8	GPL571	GSE69031	GSM1690476	Breast cancer	Breast cancer	Relapse-free survival	0	2113
BT_O8	GPL571	GSE69031	GSM1690477	Breast cancer	Breast cancer	Relapse-free survival	0	3745
BT_O8	GPL571	GSE69031	GSM1690478	Breast cancer	Breast cancer	Relapse-free survival	0	3760
BT_O8	GPL571	GSE69031	GSM1690479	Breast cancer	Breast cancer	Relapse-free survival	0	3723
BT_O8	GPL571	GSE69031	GSM1690480	Breast cancer	Breast cancer	Relapse-free survival	0	767
BT_O8	GPL571	GSE69031	GSM1690481	Breast cancer	Breast cancer	Relapse-free survival	1	245
BT_O8	GPL571	GSE69031	GSM1690483	Breast cancer	Breast cancer	Relapse-free survival	1	91
BT_O8	GPL571	GSE69031	GSM1690484	Breast cancer	Breast cancer	Relapse-free survival	0	4365
BT_O8	GPL571	GSE69031	GSM1690485	Breast cancer	Breast cancer	Relapse-free survival	0	2055
BT_O8	GPL571	GSE69031	GSM1690486	Breast cancer	Breast cancer	Relapse-free survival	0	2467
BT_O8	GPL571	GSE69031	GSM1690487	Breast cancer	Breast cancer	Relapse-free survival	0	3643
BT_O8	GPL571	GSE69031	GSM1690488	Breast cancer	Breast cancer	Relapse-free survival	0	5165
BT_O8	GPL571	GSE69031	GSM1690489	Breast cancer	Breast cancer	Relapse-free survival	0	898
BT_O8	GPL571	GSE69031	GSM1690490	Breast cancer	Breast cancer	Relapse-free survival	0	2197
BT_O8	GPL571	GSE69031	GSM1690491	Breast cancer	Breast cancer	Relapse-free survival	1	902
BT_O8	GPL571	GSE69031	GSM1690492	Breast cancer	Breast cancer	Relapse-free survival	0	1000
BT_O8	GPL571	GSE69031	GSM1690493	Breast cancer	Breast cancer	Relapse-free survival	1	1580
BT_O8	GPL571	GSE69031	GSM1690494	Breast cancer	Breast cancer	Relapse-free survival	0	1518
BT_O8	GPL571	GSE69031	GSM1690495	Breast cancer	Breast cancer	Relapse-free survival	0	2048
BT_O8	GPL571	GSE69031	GSM1690496	Breast cancer	Breast cancer	Relapse-free survival	0	2033
BT_O8	GPL571	GSE69031	GSM1690497	Breast cancer	Breast cancer	Relapse-free survival	1	2478
BT_O8	GPL571	GSE69031	GSM1690498	Breast cancer	Breast cancer	Relapse-free survival	1	978
BT_O8	GPL571	GSE69031	GSM1690499	Breast cancer	Breast cancer	Relapse-free survival	0	2924
BT_O8	GPL571	GSE69031	GSM1690500	Breast cancer	Breast cancer	Relapse-free survival	0	1602
BT_O8	GPL571	GSE69031	GSM1690501	Breast cancer	Breast cancer	Relapse-free survival	0	3763
BT_O8	GPL571	GSE69031	GSM1690502	Breast cancer	Breast cancer	Relapse-free survival	0	383
BT_O8	GPL571	GSE69031	GSM1690503	Breast cancer	Breast cancer	Relapse-free survival	0	4698
BT_O8	GPL571	GSE69031	GSM1690504	Breast cancer	Breast cancer	Relapse-free survival	0	1475
BT_O8	GPL571	GSE69031	GSM1690505	Breast cancer	Breast cancer	Relapse-free survival	0	2197
BT_O8	GPL571	GSE69031	GSM1690506	Breast cancer	Breast cancer	Relapse-free survival	0	3106
BT_O8	GPL571	GSE69031	GSM1690508	Breast cancer	Breast cancer	Relapse-free survival	0	3628
BT_O8	GPL571	GSE69031	GSM1690509	Breast cancer	Breast cancer	Relapse-free survival	0	3376
BT_O8	GPL571	GSE69031	GSM1690510	Breast cancer	Breast cancer	Relapse-free survival	1	113
BT_O8	GPL571	GSE69031	GSM1690511	Breast cancer	Breast cancer	Relapse-free survival	1	299
BT_O8	GPL571	GSE69031	GSM1690512	Breast cancer	Breast cancer	Relapse-free survival	0	3913
BT_O8	GPL571	GSE69031	GSM1690514	Breast cancer	Breast cancer	Relapse-free survival	0	157
BT_O8	GPL571	GSE69031	GSM1690515	Breast cancer	Breast cancer	Relapse-free survival	0	2759
BT_O8	GPL571	GSE69031	GSM1690516	Breast cancer	Breast cancer	Relapse-free survival	1	989
BT_O8	GPL571	GSE69031	GSM1690517	Breast cancer	Breast cancer	Relapse-free survival	0	1719
BT_O8	GPL571	GSE69031	GSM1690518	Breast cancer	Breast cancer	Relapse-free survival	1	1321
BT_O8	GPL571	GSE69031	GSM1690519	Breast cancer	Breast cancer	Relapse-free survival	0	562
BT_O8	GPL571	GSE69031	GSM1690520	Breast cancer	Breast cancer	Relapse-free survival	0	3252
BT_O8	GPL571	GSE69031	GSM1690521	Breast cancer	Breast cancer	Relapse-free survival	0	2796
BT_O8	GPL571	GSE69031	GSM1690522	Breast cancer	Breast cancer	Relapse-free survival	0	1767
BT_O8	GPL571	GSE69031	GSM1690523	Breast cancer	Breast cancer	Relapse-free survival	1	2321
BT_O8	GPL571	GSE69031	GSM1690524	Breast cancer	Breast cancer	Relapse-free survival	0	4117
BT_O8	GPL571	GSE69031	GSM1690525	Breast cancer	Breast cancer	Relapse-free survival	0	3774
BT_O8	GPL571	GSE69031	GSM1690526	Breast cancer	Breast cancer	Relapse-free survival	0	3322
BT_O8	GPL571	GSE69031	GSM1690527	Breast cancer	Breast cancer	Relapse-free survival	0	2059
BT_O8	GPL571	GSE69031	GSM1690528	Breast cancer	Breast cancer	Relapse-free survival	0	3059
BT_O8	GPL571	GSE69031	GSM1690529	Breast cancer	Breast cancer	Relapse-free survival	0	3504
BT_O8	GPL571	GSE69031	GSM1690530	Breast cancer	Breast cancer	Relapse-free survival	0	383
BT_O8	GPL571	GSE69031	GSM1690531	Breast cancer	Breast cancer	Relapse-free survival	0	1117
BT_O8	GPL571	GSE69031	GSM1690532	Breast cancer	Breast cancer	Relapse-free survival	1	1281
BT_O8	GPL571	GSE69031	GSM1690533	Breast cancer	Breast cancer	Relapse-free survival	1	679
BT_O8	GPL571	GSE69031	GSM1690534	Breast cancer	Breast cancer	Relapse-free survival	1	785
BT_O8	GPL571	GSE69031	GSM1690535	Breast cancer	Breast cancer	Relapse-free survival	0	4008
BT_O8	GPL571	GSE69031	GSM1690536	Breast cancer	Breast cancer	Relapse-free survival	0	1632
BT_O8	GPL571	GSE69031	GSM1690537	Breast cancer	Breast cancer	Relapse-free survival	0	4008
BT_O8	GPL571	GSE69031	GSM1690538	Breast cancer	Breast cancer	Relapse-free survival	0	2081
BT_O8	GPL571	GSE69031	GSM1690539	Breast cancer	Breast cancer	Relapse-free survival	0	1927
BT_O8	GPL571	GSE69031	GSM1690540	Breast cancer	Breast cancer	Relapse-free survival	1	1212
BT_O8	GPL571	GSE69031	GSM1690541	Breast cancer	Breast cancer	Relapse-free survival	0	3289
BT_O8	GPL571	GSE69031	GSM1690542	Breast cancer	Breast cancer	Relapse-free survival	0	2869
BT_O8	GPL571	GSE69031	GSM1690543	Breast cancer	Breast cancer	Relapse-free survival	0	150
BT_O8	GPL571	GSE69031	GSM1690544	Breast cancer	Breast cancer	Relapse-free survival	1	153
BT_O8	GPL571	GSE69031	GSM1690545	Breast cancer	Breast cancer	Relapse-free survival	1	2380
BT_O8	GPL571	GSE69031	GSM1690546	Breast cancer	Breast cancer	Relapse-free survival	1	518
BT_O8	GPL571	GSE69031	GSM1690547	Breast cancer	Breast cancer	Relapse-free survival	0	748
BT_O8	GPL571	GSE69031	GSM1690548	Breast cancer	Breast cancer	Relapse-free survival	0	412
BT_O8	GPL571	GSE69031	GSM1690549	Breast cancer	Breast cancer	Relapse-free survival	1	558
BT_O8	GPL571	GSE69031	GSM1690550	Breast cancer	Breast cancer	Relapse-free survival	1	829
BT_O8	GPL571	GSE69031	GSM1690551	Breast cancer	Breast cancer	Relapse-free survival	0	2533
BT_O8	GPL571	GSE69031	GSM1690552	Breast cancer	Breast cancer	Relapse-free survival	0	3544
BT_O8	GPL571	GSE69031	GSM1690553	Breast cancer	Breast cancer	Relapse-free survival	0	3113
BT_O8	GPL571	GSE69031	GSM1690554	Breast cancer	Breast cancer	Relapse-free survival	0	3577
BT_O8	GPL571	GSE69031	GSM1690555	Breast cancer	Breast cancer	Relapse-free survival	0	1602
BT_O8	GPL571	GSE69031	GSM1690556	Breast cancer	Breast cancer	Relapse-free survival	0	4143
BT_O8	GPL571	GSE69031	GSM1690557	Breast cancer	Breast cancer	Relapse-free survival	0	2497
BT_O8	GPL571	GSE69031	GSM1690558	Breast cancer	Breast cancer	Relapse-free survival	1	1475
BT_O8	GPL571	GSE69031	GSM1690559	Breast cancer	Breast cancer	Relapse-free survival	0	4143
BT_O8	GPL571	GSE69031	GSM1690560	Breast cancer	Breast cancer	Relapse-free survival	0	245
BT_O8	GPL571	GSE69031	GSM1690561	Breast cancer	Breast cancer	Relapse-free survival	0	47
BT_O8	GPL571	GSE69031	GSM1690562	Breast cancer	Breast cancer	Relapse-free survival	0	5019
BT_O8	GPL571	GSE69031	GSM1690563	Breast cancer	Breast cancer	Relapse-free survival	0	2884
BT_O8	GPL571	GSE69031	GSM1690564	Breast cancer	Breast cancer	Relapse-free survival	0	2183
BT_O8	GPL571	GSE69031	GSM1690565	Breast cancer	Breast cancer	Relapse-free survival	0	3139
BT_O8	GPL571	GSE69031	GSM1690567	Breast cancer	Breast cancer	Relapse-free survival	0	3270
BT_O8	GPL571	GSE69031	GSM1690568	Breast cancer	Breast cancer	Relapse-free survival	0	4103
BT_O8	GPL571	GSE69031	GSM1690569	Breast cancer	Breast cancer	Relapse-free survival	1	1099
BT_O9	GPL570	GSE58812	GSM1419942	Breast cancer	Triple-negative breast cancer	Overall survival	1	1520
BT_O9	GPL570	GSE58812	GSM1419943	Breast cancer	Triple-negative breast cancer	Overall survival	1	1281
BT_O9	GPL570	GSE58812	GSM1419944	Breast cancer	Triple-negative breast cancer	Overall survival	1	1066
BT_O9	GPL570	GSE58812	GSM1419945	Breast cancer	Triple-negative breast cancer	Overall survival	1	1050
BT_O9	GPL570	GSE58812	GSM1419946	Breast cancer	Triple-negative breast cancer	Overall survival	1	422
BT_O9	GPL570	GSE58812	GSM1419947	Breast cancer	Triple-negative breast cancer	Overall survival	0	2081
BT_O9	GPL570	GSE58812	GSM1419948	Breast cancer	Triple-negative breast cancer	Overall survival	0	4517
BT_O9	GPL570	GSE58812	GSM1419949	Breast cancer	Triple-negative breast cancer	Overall survival	0	3070
BT_O9	GPL570	GSE58812	GSM1419950	Breast cancer	Triple-negative breast cancer	Overall survival	1	618
BT_O9	GPL570	GSE58812	GSM1419951	Breast cancer	Triple-negative breast cancer	Overall survival	0	5150
BT_O9	GPL570	GSE58812	GSM1419952	Breast cancer	Triple-negative breast cancer	Overall survival	0	4996
BT_O9	GPL570	GSE58812	GSM1419953	Breast cancer	Triple-negative breast cancer	Overall survival	1	480
BT_O9	GPL570	GSE58812	GSM1419954	Breast cancer	Triple-negative breast cancer	Overall survival	0	4815
BT_O9	GPL570	GSE58812	GSM1419955	Breast cancer	Triple-negative breast cancer	Overall survival	0	1879
BT_O9	GPL570	GSE58812	GSM1419956	Breast cancer	Triple-negative breast cancer	Overall survival	1	1081
BT_O9	GPL570	GSE58812	GSM1419957	Breast cancer	Triple-negative breast cancer	Overall survival	0	4939
BT_O9	GPL570	GSE58812	GSM1419958	Breast cancer	Triple-negative breast cancer	Overall survival	0	4783
BT_O9	GPL570	GSE58812	GSM1419968	Breast cancer	Triple-negative breast cancer	Overall survival	0	4824
BT_O9	GPL570	GSE58812	GSM1419969	Breast cancer	Triple-negative breast cancer	Overall survival	1	767
BT_O9	GPL570	GSE58812	GSM1419970	Breast cancer	Triple-negative breast cancer	Overall survival	0	4562
BT_O9	GPL570	GSE58812	GSM1419971	Breast cancer	Triple-negative breast cancer	Overall survival	1	871
BT_O9	GPL570	GSE58812	GSM1419972	Breast cancer	Triple-negative breast cancer	Overall survival	0	4572
BT_O9	GPL570	GSE58812	GSM1419973	Breast cancer	Triple-negative breast cancer	Overall survival	1	1055
BT_O9	GPL570	GSE58812	GSM1419974	Breast cancer	Triple-negative breast cancer	Overall survival	1	1430
BT_O9	GPL570	GSE58812	GSM1419975	Breast cancer	Triple-negative breast cancer	Overall survival	0	4270
BT_O9	GPL570	GSE58812	GSM1419976	Breast cancer	Triple-negative breast cancer	Overall survival	0	3884
BT_O9	GPL570	GSE58812	GSM1419977	Breast cancer	Triple-negative breast cancer	Overall survival	0	2034
BT_O9	GPL570	GSE58812	GSM1419978	Breast cancer	Triple-negative breast cancer	Overall survival	0	2593
BT_O9	GPL570	GSE58812	GSM1419979	Breast cancer	Triple-negative breast cancer	Overall survival	0	3786
BT_O9	GPL570	GSE58812	GSM1419980	Breast cancer	Triple-negative breast cancer	Overall survival	0	4143
BT_O9	GPL570	GSE58812	GSM1419981	Breast cancer	Triple-negative breast cancer	Overall survival	0	4147
BT_O9	GPL570	GSE58812	GSM1419982	Breast cancer	Triple-negative breast cancer	Overall survival	0	3809
BT_O9	GPL570	GSE58812	GSM1419983	Breast cancer	Triple-negative breast cancer	Overall survival	0	1217
BT_O9	GPL570	GSE58812	GSM1419984	Breast cancer	Triple-negative breast cancer	Overall survival	0	3393
BT_O9	GPL570	GSE58812	GSM1419985	Breast cancer	Triple-negative breast cancer	Overall survival	0	616
BT_O9	GPL570	GSE58812	GSM1419986	Breast cancer	Triple-negative breast cancer	Overall survival	0	3492
BT_O9	GPL570	GSE58812	GSM1419987	Breast cancer	Triple-negative breast cancer	Overall survival	0	3628
BT_O9	GPL570	GSE58812	GSM1419988	Breast cancer	Triple-negative breast cancer	Overall survival	0	3473
BT_O9	GPL570	GSE58812	GSM1419989	Breast cancer	Triple-negative breast cancer	Overall survival	0	65
BT_O9	GPL570	GSE58812	GSM1419990	Breast cancer	Triple-negative breast cancer	Overall survival	0	3221
BT_O9	GPL570	GSE58812	GSM1419991	Breast cancer	Triple-negative breast cancer	Overall survival	1	822
BT_O9	GPL570	GSE58812	GSM1419992	Breast cancer	Triple-negative breast cancer	Overall survival	0	3001
BT_O9	GPL570	GSE58812	GSM1419993	Breast cancer	Triple-negative breast cancer	Overall survival	0	2125
BT_O9	GPL570	GSE58812	GSM1419994	Breast cancer	Triple-negative breast cancer	Overall survival	1	163
BT_O9	GPL570	GSE58812	GSM1419995	Breast cancer	Triple-negative breast cancer	Overall survival	1	1047
BT_O9	GPL570	GSE58812	GSM1419996	Breast cancer	Triple-negative breast cancer	Overall survival	0	2887
BT_O9	GPL570	GSE58812	GSM1419997	Breast cancer	Triple-negative breast cancer	Overall survival	0	2658
BT_O9	GPL570	GSE58812	GSM1419998	Breast cancer	Triple-negative breast cancer	Overall survival	0	20
BT_O9	GPL570	GSE58812	GSM1419999	Breast cancer	Triple-negative breast cancer	Overall survival	0	2781
BT_O9	GPL570	GSE58812	GSM1420000	Breast cancer	Triple-negative breast cancer	Overall survival	0	2672
BT_O9	GPL570	GSE58812	GSM1420001	Breast cancer	Triple-negative breast cancer	Overall survival	0	2569
BT_O9	GPL570	GSE58812	GSM1420002	Breast cancer	Triple-negative breast cancer	Overall survival	1	2261
BT_O9	GPL570	GSE58812	GSM1420003	Breast cancer	Triple-negative breast cancer	Overall survival	0	2086
BT_O9	GPL570	GSE58812	GSM1420004	Breast cancer	Triple-negative breast cancer	Overall survival	0	2527
BT_O9	GPL570	GSE58812	GSM1420005	Breast cancer	Triple-negative breast cancer	Overall survival	1	811
BT_O9	GPL570	GSE58812	GSM1420006	Breast cancer	Triple-negative breast cancer	Overall survival	0	2293
BT_O9	GPL570	GSE58812	GSM1420007	Breast cancer	Triple-negative breast cancer	Overall survival	0	2456
BT_O9	GPL570	GSE58812	GSM1420008	Breast cancer	Triple-negative breast cancer	Overall survival	0	2418
BT_O9	GPL570	GSE58812	GSM1420009	Breast cancer	Triple-negative breast cancer	Overall survival	0	1950
BT_O9	GPL570	GSE58812	GSM1420010	Breast cancer	Triple-negative breast cancer	Overall survival	1	1638
BT_O9	GPL570	GSE58812	GSM1420011	Breast cancer	Triple-negative breast cancer	Overall survival	0	1466
BT_O9	GPL570	GSE58812	GSM1420012	Breast cancer	Triple-negative breast cancer	Overall survival	1	1632
BT_O9	GPL570	GSE58812	GSM1420013	Breast cancer	Triple-negative breast cancer	Overall survival	0	2315
BT_O9	GPL570	GSE58812	GSM1420014	Breast cancer	Triple-negative breast cancer	Overall survival	0	2080
BT_O9	GPL570	GSE58812	GSM1420015	Breast cancer	Triple-negative breast cancer	Overall survival	0	2011
BT_O9	GPL570	GSE58812	GSM1420016	Breast cancer	Triple-negative breast cancer	Overall survival	0	2063
BT_O9	GPL570	GSE58812	GSM1420017	Breast cancer	Triple-negative breast cancer	Overall survival	0	2289
BT_O9	GPL570	GSE58812	GSM1420018	Breast cancer	Triple-negative breast cancer	Overall survival	1	839
BT_O9	GPL570	GSE58812	GSM1420019	Breast cancer	Triple-negative breast cancer	Overall survival	1	601
BT_O9	GPL570	GSE58812	GSM1420020	Breast cancer	Triple-negative breast cancer	Overall survival	0	1560
BT_O9	GPL570	GSE58812	GSM1420021	Breast cancer	Triple-negative breast cancer	Overall survival	1	617
BT_O9	GPL570	GSE58812	GSM1420022	Breast cancer	Triple-negative breast cancer	Overall survival	0	3277
BT_O9	GPL570	GSE58812	GSM1420023	Breast cancer	Triple-negative breast cancer	Overall survival	0	2032
BT_O9	GPL570	GSE58812	GSM1420024	Breast cancer	Triple-negative breast cancer	Overall survival	0	3341
BT_O9	GPL570	GSE58812	GSM1420025	Breast cancer	Triple-negative breast cancer	Overall survival	0	3351
BT_O9	GPL570	GSE58812	GSM1420026	Breast cancer	Triple-negative breast cancer	Overall survival	0	2524
BT_O9	GPL570	GSE58812	GSM1420027	Breast cancer	Triple-negative breast cancer	Overall survival	0	3053
BT_O9	GPL570	GSE58812	GSM1420028	Breast cancer	Triple-negative breast cancer	Overall survival	1	1443
BT_O9	GPL570	GSE58812	GSM1420029	Breast cancer	Triple-negative breast cancer	Overall survival	0	3148
BT_O9	GPL570	GSE58812	GSM1420030	Breast cancer	Triple-negative breast cancer	Overall survival	0	2991
BT_O9	GPL570	GSE58812	GSM1420031	Breast cancer	Triple-negative breast cancer	Overall survival	0	1422
BT_O9	GPL570	GSE58812	GSM1420032	Breast cancer	Triple-negative breast cancer	Overall survival	0	818
BT_O9	GPL570	GSE58812	GSM1420033	Breast cancer	Triple-negative breast cancer	Overall survival	0	2570
BT_O9	GPL570	GSE58812	GSM1420034	Breast cancer	Triple-negative breast cancer	Overall survival	0	2619
BT_O9	GPL570	GSE58812	GSM1420035	Breast cancer	Triple-negative breast cancer	Overall survival	1	986
BT_O9	GPL570	GSE58812	GSM1420036	Breast cancer	Triple-negative breast cancer	Overall survival	0	2648
BT_O9	GPL570	GSE58812	GSM1420037	Breast cancer	Triple-negative breast cancer	Overall survival	0	2717
BT_O9	GPL570	GSE58812	GSM1420038	Breast cancer	Triple-negative breast cancer	Overall survival	1	1185
BT_O9	GPL570	GSE58812	GSM1420039	Breast cancer	Triple-negative breast cancer	Overall survival	1	619
BT_O9	GPL570	GSE58812	GSM1420040	Breast cancer	Triple-negative breast cancer	Overall survival	0	1632
BT_O9	GPL570	GSE58812	GSM1420041	Breast cancer	Triple-negative breast cancer	Overall survival	1	1734
BT_O9	GPL570	GSE58812	GSM1420042	Breast cancer	Triple-negative breast cancer	Overall survival	0	2219
BT_O9	GPL570	GSE58812	GSM1420043	Breast cancer	Triple-negative breast cancer	Overall survival	1	892
BT_O9	GPL570	GSE58812	GSM1420044	Breast cancer	Triple-negative breast cancer	Overall survival	0	1892
BT_O9	GPL570	GSE58812	GSM1420045	Breast cancer	Triple-negative breast cancer	Overall survival	0	2009
BT_O9	GPL570	GSE58812	GSM1420046	Breast cancer	Triple-negative breast cancer	Overall survival	0	2025
BT_O9	GPL570	GSE58812	GSM1420047	Breast cancer	Triple-negative breast cancer	Overall survival	0	1664
BT_O9	GPL570	GSE58812	GSM1420048	Breast cancer	Triple-negative breast cancer	Overall survival	0	1633
BT_O9	GPL570	GSE58812	GSM1420049	Breast cancer	Triple-negative breast cancer	Overall survival	0	1780
BT_O9	GPL570	GSE58812	GSM1420050	Breast cancer	Triple-negative breast cancer	Overall survival	0	1639
BT_O9	GPL570	GSE58812	GSM1420051	Breast cancer	Triple-negative breast cancer	Overall survival	1	904
BT_O9	GPL570	GSE58812	GSM1420052	Breast cancer	Triple-negative breast cancer	Overall survival	0	1647
BT_O9	GPL570	GSE58812	GSM1420053	Breast cancer	Triple-negative breast cancer	Overall survival	0	1547
BT_O9	GPL570	GSE58812	GSM1420054	Breast cancer	Triple-negative breast cancer	Overall survival	0	1262
BT_O9	GPL570	GSE58812	GSM1420055	Breast cancer	Triple-negative breast cancer	Overall survival	0	1430
BT_O9	GPL570	GSE58812	GSM1420056	Breast cancer	Triple-negative breast cancer	Overall survival	0	1381
BT_O9	GPL570	GSE58812	GSM1420057	Breast cancer	Triple-negative breast cancer	Overall survival	0	1390
BT_O10	GPL570	GSE58812	GSM1419942	Breast cancer	Triple-negative breast cancer	Metastasis-free survival	1	1184
BT_O10	GPL570	GSE58812	GSM1419943	Breast cancer	Triple-negative breast cancer	Metastasis-free survival	1	984
BT_O10	GPL570	GSE58812	GSM1419944	Breast cancer	Triple-negative breast cancer	Metastasis-free survival	1	877
BT_O10	GPL570	GSE58812	GSM1419945	Breast cancer	Triple-negative breast cancer	Metastasis-free survival	1	905
BT_O10	GPL570	GSE58812	GSM1419946	Breast cancer	Triple-negative breast cancer	Metastasis-free survival	1	340
BT_O10	GPL570	GSE58812	GSM1419947	Breast cancer	Triple-negative breast cancer	Metastasis-free survival	0	2081
BT_O10	GPL570	GSE58812	GSM1419948	Breast cancer	Triple-negative breast cancer	Metastasis-free survival	0	4517
BT_O10	GPL570	GSE58812	GSM1419949	Breast cancer	Triple-negative breast cancer	Metastasis-free survival	0	3070
BT_O10	GPL570	GSE58812	GSM1419950	Breast cancer	Triple-negative breast cancer	Metastasis-free survival	1	395
BT_O10	GPL570	GSE58812	GSM1419951	Breast cancer	Triple-negative breast cancer	Metastasis-free survival	0	5150
BT_O10	GPL570	GSE58812	GSM1419952	Breast cancer	Triple-negative breast cancer	Metastasis-free survival	0	4996
BT_O10	GPL570	GSE58812	GSM1419953	Breast cancer	Triple-negative breast cancer	Metastasis-free survival	1	419
BT_O10	GPL570	GSE58812	GSM1419954	Breast cancer	Triple-negative breast cancer	Metastasis-free survival	0	4815
BT_O10	GPL570	GSE58812	GSM1419955	Breast cancer	Triple-negative breast cancer	Metastasis-free survival	0	1879
BT_O10	GPL570	GSE58812	GSM1419956	Breast cancer	Triple-negative breast cancer	Metastasis-free survival	0	1081
BT_O10	GPL570	GSE58812	GSM1419957	Breast cancer	Triple-negative breast cancer	Metastasis-free survival	0	4939
BT_O10	GPL570	GSE58812	GSM1419958	Breast cancer	Triple-negative breast cancer	Metastasis-free survival	0	4783
BT_O10	GPL570	GSE58812	GSM1419968	Breast cancer	Triple-negative breast cancer	Metastasis-free survival	0	4824
BT_O10	GPL570	GSE58812	GSM1419969	Breast cancer	Triple-negative breast cancer	Metastasis-free survival	1	495
BT_O10	GPL570	GSE58812	GSM1419970	Breast cancer	Triple-negative breast cancer	Metastasis-free survival	0	4562
BT_O10	GPL570	GSE58812	GSM1419971	Breast cancer	Triple-negative breast cancer	Metastasis-free survival	1	517
BT_O10	GPL570	GSE58812	GSM1419972	Breast cancer	Triple-negative breast cancer	Metastasis-free survival	0	4572
BT_O10	GPL570	GSE58812	GSM1419973	Breast cancer	Triple-negative breast cancer	Metastasis-free survival	1	1017
BT_O10	GPL570	GSE58812	GSM1419974	Breast cancer	Triple-negative breast cancer	Metastasis-free survival	1	799
BT_O10	GPL570	GSE58812	GSM1419975	Breast cancer	Triple-negative breast cancer	Metastasis-free survival	0	4270
BT_O10	GPL570	GSE58812	GSM1419976	Breast cancer	Triple-negative breast cancer	Metastasis-free survival	0	3884
BT_O10	GPL570	GSE58812	GSM1419977	Breast cancer	Triple-negative breast cancer	Metastasis-free survival	0	2034
BT_O10	GPL570	GSE58812	GSM1419978	Breast cancer	Triple-negative breast cancer	Metastasis-free survival	0	2593
BT_O10	GPL570	GSE58812	GSM1419979	Breast cancer	Triple-negative breast cancer	Metastasis-free survival	0	3786
BT_O10	GPL570	GSE58812	GSM1419980	Breast cancer	Triple-negative breast cancer	Metastasis-free survival	0	4143
BT_O10	GPL570	GSE58812	GSM1419981	Breast cancer	Triple-negative breast cancer	Metastasis-free survival	0	4147
BT_O10	GPL570	GSE58812	GSM1419982	Breast cancer	Triple-negative breast cancer	Metastasis-free survival	0	3809
BT_O10	GPL570	GSE58812	GSM1419983	Breast cancer	Triple-negative breast cancer	Metastasis-free survival	0	1217
BT_O10	GPL570	GSE58812	GSM1419984	Breast cancer	Triple-negative breast cancer	Metastasis-free survival	0	3393
BT_O10	GPL570	GSE58812	GSM1419985	Breast cancer	Triple-negative breast cancer	Metastasis-free survival	0	616
BT_O10	GPL570	GSE58812	GSM1419986	Breast cancer	Triple-negative breast cancer	Metastasis-free survival	0	3492
BT_O10	GPL570	GSE58812	GSM1419987	Breast cancer	Triple-negative breast cancer	Metastasis-free survival	0	3628
BT_O10	GPL570	GSE58812	GSM1419988	Breast cancer	Triple-negative breast cancer	Metastasis-free survival	0	3473
BT_O10	GPL570	GSE58812	GSM1419989	Breast cancer	Triple-negative breast cancer	Metastasis-free survival	0	65
BT_O10	GPL570	GSE58812	GSM1419990	Breast cancer	Triple-negative breast cancer	Metastasis-free survival	0	3221
BT_O10	GPL570	GSE58812	GSM1419991	Breast cancer	Triple-negative breast cancer	Metastasis-free survival	1	490
BT_O10	GPL570	GSE58812	GSM1419992	Breast cancer	Triple-negative breast cancer	Metastasis-free survival	0	3001
BT_O10	GPL570	GSE58812	GSM1419993	Breast cancer	Triple-negative breast cancer	Metastasis-free survival	0	2125
BT_O10	GPL570	GSE58812	GSM1419994	Breast cancer	Triple-negative breast cancer	Metastasis-free survival	0	163
BT_O10	GPL570	GSE58812	GSM1419995	Breast cancer	Triple-negative breast cancer	Metastasis-free survival	1	434
BT_O10	GPL570	GSE58812	GSM1419996	Breast cancer	Triple-negative breast cancer	Metastasis-free survival	0	2887
BT_O10	GPL570	GSE58812	GSM1419997	Breast cancer	Triple-negative breast cancer	Metastasis-free survival	0	2658
BT_O10	GPL570	GSE58812	GSM1419998	Breast cancer	Triple-negative breast cancer	Metastasis-free survival	0	20
BT_O10	GPL570	GSE58812	GSM1419999	Breast cancer	Triple-negative breast cancer	Metastasis-free survival	1	2624
BT_O10	GPL570	GSE58812	GSM1420000	Breast cancer	Triple-negative breast cancer	Metastasis-free survival	0	2672
BT_O10	GPL570	GSE58812	GSM1420001	Breast cancer	Triple-negative breast cancer	Metastasis-free survival	0	2569
BT_O10	GPL570	GSE58812	GSM1420002	Breast cancer	Triple-negative breast cancer	Metastasis-free survival	1	1443
BT_O10	GPL570	GSE58812	GSM1420003	Breast cancer	Triple-negative breast cancer	Metastasis-free survival	0	2086
BT_O10	GPL570	GSE58812	GSM1420004	Breast cancer	Triple-negative breast cancer	Metastasis-free survival	0	2527
BT_O10	GPL570	GSE58812	GSM1420005	Breast cancer	Triple-negative breast cancer	Metastasis-free survival	0	811
BT_O10	GPL570	GSE58812	GSM1420006	Breast cancer	Triple-negative breast cancer	Metastasis-free survival	0	2293
BT_O10	GPL570	GSE58812	GSM1420007	Breast cancer	Triple-negative breast cancer	Metastasis-free survival	0	2456
BT_O10	GPL570	GSE58812	GSM1420008	Breast cancer	Triple-negative breast cancer	Metastasis-free survival	0	2418
BT_O10	GPL570	GSE58812	GSM1420009	Breast cancer	Triple-negative breast cancer	Metastasis-free survival	0	1950
BT_O10	GPL570	GSE58812	GSM1420010	Breast cancer	Triple-negative breast cancer	Metastasis-free survival	1	1087
BT_O10	GPL570	GSE58812	GSM1420011	Breast cancer	Triple-negative breast cancer	Metastasis-free survival	0	1466
BT_O10	GPL570	GSE58812	GSM1420012	Breast cancer	Triple-negative breast cancer	Metastasis-free survival	1	1083
BT_O10	GPL570	GSE58812	GSM1420013	Breast cancer	Triple-negative breast cancer	Metastasis-free survival	0	2315
BT_O10	GPL570	GSE58812	GSM1420014	Breast cancer	Triple-negative breast cancer	Metastasis-free survival	0	2080
BT_O10	GPL570	GSE58812	GSM1420015	Breast cancer	Triple-negative breast cancer	Metastasis-free survival	1	2009
BT_O10	GPL570	GSE58812	GSM1420016	Breast cancer	Triple-negative breast cancer	Metastasis-free survival	0	2063
BT_O10	GPL570	GSE58812	GSM1420017	Breast cancer	Triple-negative breast cancer	Metastasis-free survival	0	2289
BT_O10	GPL570	GSE58812	GSM1420018	Breast cancer	Triple-negative breast cancer	Metastasis-free survival	1	555
BT_O10	GPL570	GSE58812	GSM1420019	Breast cancer	Triple-negative breast cancer	Metastasis-free survival	1	500
BT_O10	GPL570	GSE58812	GSM1420020	Breast cancer	Triple-negative breast cancer	Metastasis-free survival	0	1560
BT_O10	GPL570	GSE58812	GSM1420021	Breast cancer	Triple-negative breast cancer	Metastasis-free survival	1	599
BT_O10	GPL570	GSE58812	GSM1420022	Breast cancer	Triple-negative breast cancer	Metastasis-free survival	0	3277
BT_O10	GPL570	GSE58812	GSM1420023	Breast cancer	Triple-negative breast cancer	Metastasis-free survival	0	2032
BT_O10	GPL570	GSE58812	GSM1420024	Breast cancer	Triple-negative breast cancer	Metastasis-free survival	0	3341
BT_O10	GPL570	GSE58812	GSM1420025	Breast cancer	Triple-negative breast cancer	Metastasis-free survival	0	3351
BT_O10	GPL570	GSE58812	GSM1420026	Breast cancer	Triple-negative breast cancer	Metastasis-free survival	0	2524
BT_O10	GPL570	GSE58812	GSM1420027	Breast cancer	Triple-negative breast cancer	Metastasis-free survival	0	3053
BT_O10	GPL570	GSE58812	GSM1420028	Breast cancer	Triple-negative breast cancer	Metastasis-free survival	1	1158
BT_O10	GPL570	GSE58812	GSM1420029	Breast cancer	Triple-negative breast cancer	Metastasis-free survival	0	3148
BT_O10	GPL570	GSE58812	GSM1420030	Breast cancer	Triple-negative breast cancer	Metastasis-free survival	0	2991
BT_O10	GPL570	GSE58812	GSM1420031	Breast cancer	Triple-negative breast cancer	Metastasis-free survival	0	1422
BT_O10	GPL570	GSE58812	GSM1420032	Breast cancer	Triple-negative breast cancer	Metastasis-free survival	1	783
BT_O10	GPL570	GSE58812	GSM1420033	Breast cancer	Triple-negative breast cancer	Metastasis-free survival	0	2570
BT_O10	GPL570	GSE58812	GSM1420034	Breast cancer	Triple-negative breast cancer	Metastasis-free survival	0	2619
BT_O10	GPL570	GSE58812	GSM1420035	Breast cancer	Triple-negative breast cancer	Metastasis-free survival	1	705
BT_O10	GPL570	GSE58812	GSM1420036	Breast cancer	Triple-negative breast cancer	Metastasis-free survival	0	2648
BT_O10	GPL570	GSE58812	GSM1420037	Breast cancer	Triple-negative breast cancer	Metastasis-free survival	0	2717
BT_O10	GPL570	GSE58812	GSM1420038	Breast cancer	Triple-negative breast cancer	Metastasis-free survival	1	940
BT_O10	GPL570	GSE58812	GSM1420039	Breast cancer	Triple-negative breast cancer	Metastasis-free survival	1	527
BT_O10	GPL570	GSE58812	GSM1420040	Breast cancer	Triple-negative breast cancer	Metastasis-free survival	0	1632
BT_O10	GPL570	GSE58812	GSM1420041	Breast cancer	Triple-negative breast cancer	Metastasis-free survival	1	925
BT_O10	GPL570	GSE58812	GSM1420042	Breast cancer	Triple-negative breast cancer	Metastasis-free survival	0	2219
BT_O10	GPL570	GSE58812	GSM1420043	Breast cancer	Triple-negative breast cancer	Metastasis-free survival	1	875
BT_O10	GPL570	GSE58812	GSM1420044	Breast cancer	Triple-negative breast cancer	Metastasis-free survival	0	1892
BT_O10	GPL570	GSE58812	GSM1420045	Breast cancer	Triple-negative breast cancer	Metastasis-free survival	0	2009
BT_O10	GPL570	GSE58812	GSM1420046	Breast cancer	Triple-negative breast cancer	Metastasis-free survival	0	2025
BT_O10	GPL570	GSE58812	GSM1420047	Breast cancer	Triple-negative breast cancer	Metastasis-free survival	0	1664
BT_O10	GPL570	GSE58812	GSM1420048	Breast cancer	Triple-negative breast cancer	Metastasis-free survival	0	1633
BT_O10	GPL570	GSE58812	GSM1420049	Breast cancer	Triple-negative breast cancer	Metastasis-free survival	0	1780
BT_O10	GPL570	GSE58812	GSM1420050	Breast cancer	Triple-negative breast cancer	Metastasis-free survival	0	1639
BT_O10	GPL570	GSE58812	GSM1420051	Breast cancer	Triple-negative breast cancer	Metastasis-free survival	1	783
BT_O10	GPL570	GSE58812	GSM1420052	Breast cancer	Triple-negative breast cancer	Metastasis-free survival	0	1647
BT_O10	GPL570	GSE58812	GSM1420053	Breast cancer	Triple-negative breast cancer	Metastasis-free survival	0	1547
BT_O10	GPL570	GSE58812	GSM1420054	Breast cancer	Triple-negative breast cancer	Metastasis-free survival	0	1262
BT_O10	GPL570	GSE58812	GSM1420055	Breast cancer	Triple-negative breast cancer	Metastasis-free survival	0	1430
BT_O10	GPL570	GSE58812	GSM1420056	Breast cancer	Triple-negative breast cancer	Metastasis-free survival	1	415
BT_O10	GPL570	GSE58812	GSM1420057	Breast cancer	Triple-negative breast cancer	Metastasis-free survival	1	1027
BT_O11	GPL570	GSE48390	GSM1176873	Breast cancer	Breast cancer	Overall survival	0	2008
BT_O11	GPL570	GSE48390	GSM1176874	Breast cancer	Breast cancer	Overall survival	0	1522
BT_O11	GPL570	GSE48390	GSM1176875	Breast cancer	Breast cancer	Overall survival	0	1489
BT_O11	GPL570	GSE48390	GSM1176876	Breast cancer	Breast cancer	Overall survival	0	2070
BT_O11	GPL570	GSE48390	GSM1176877	Breast cancer	Breast cancer	Overall survival	1	29
BT_O11	GPL570	GSE48390	GSM1176878	Breast cancer	Breast cancer	Overall survival	0	1340
BT_O11	GPL570	GSE48390	GSM1176879	Breast cancer	Breast cancer	Overall survival	0	1340
BT_O11	GPL570	GSE48390	GSM1176880	Breast cancer	Breast cancer	Overall survival	0	759
BT_O11	GPL570	GSE48390	GSM1176881	Breast cancer	Breast cancer	Overall survival	0	1307
BT_O11	GPL570	GSE48390	GSM1176882	Breast cancer	Breast cancer	Overall survival	0	1124
BT_O11	GPL570	GSE48390	GSM1176883	Breast cancer	Breast cancer	Overall survival	0	759
BT_O11	GPL570	GSE48390	GSM1176884	Breast cancer	Breast cancer	Overall survival	0	1157
BT_O11	GPL570	GSE48390	GSM1176885	Breast cancer	Breast cancer	Overall survival	0	2037
BT_O11	GPL570	GSE48390	GSM1176886	Breast cancer	Breast cancer	Overall survival	0	792
BT_O11	GPL570	GSE48390	GSM1176887	Breast cancer	Breast cancer	Overall survival	0	456
BT_O11	GPL570	GSE48390	GSM1176888	Breast cancer	Breast cancer	Overall survival	0	2008
BT_O11	GPL570	GSE48390	GSM1176889	Breast cancer	Breast cancer	Overall survival	1	610
BT_O11	GPL570	GSE48390	GSM1176890	Breast cancer	Breast cancer	Overall survival	0	639
BT_O11	GPL570	GSE48390	GSM1176891	Breast cancer	Breast cancer	Overall survival	0	975
BT_O11	GPL570	GSE48390	GSM1176892	Breast cancer	Breast cancer	Overall survival	0	2037
BT_O11	GPL570	GSE48390	GSM1176893	Breast cancer	Breast cancer	Overall survival	0	2070
BT_O11	GPL570	GSE48390	GSM1176894	Breast cancer	Breast cancer	Overall survival	0	2070
BT_O11	GPL570	GSE48390	GSM1176895	Breast cancer	Breast cancer	Overall survival	0	1825
BT_O11	GPL570	GSE48390	GSM1176896	Breast cancer	Breast cancer	Overall survival	0	1460
BT_O11	GPL570	GSE48390	GSM1176897	Breast cancer	Breast cancer	Overall survival	0	1734
BT_O11	GPL570	GSE48390	GSM1176898	Breast cancer	Breast cancer	Overall survival	1	1248
BT_O11	GPL570	GSE48390	GSM1176899	Breast cancer	Breast cancer	Overall survival	1	485
BT_O11	GPL570	GSE48390	GSM1176900	Breast cancer	Breast cancer	Overall survival	1	639
BT_O11	GPL570	GSE48390	GSM1176901	Breast cancer	Breast cancer	Overall survival	0	1825
BT_O11	GPL570	GSE48390	GSM1176902	Breast cancer	Breast cancer	Overall survival	0	1796
BT_O11	GPL570	GSE48390	GSM1176903	Breast cancer	Breast cancer	Overall survival	0	1796
BT_O11	GPL570	GSE48390	GSM1176904	Breast cancer	Breast cancer	Overall survival	0	2037
BT_O11	GPL570	GSE48390	GSM1176905	Breast cancer	Breast cancer	Overall survival	0	1796
BT_O11	GPL570	GSE48390	GSM1176906	Breast cancer	Breast cancer	Overall survival	0	1825
BT_O11	GPL570	GSE48390	GSM1176907	Breast cancer	Breast cancer	Overall survival	0	1705
BT_O11	GPL570	GSE48390	GSM1176908	Breast cancer	Breast cancer	Overall survival	0	1734
BT_O11	GPL570	GSE48390	GSM1176909	Breast cancer	Breast cancer	Overall survival	0	1763
BT_O11	GPL570	GSE48390	GSM1176910	Breast cancer	Breast cancer	Overall survival	1	577
BT_O11	GPL570	GSE48390	GSM1176911	Breast cancer	Breast cancer	Overall survival	0	2099
BT_O11	GPL570	GSE48390	GSM1176912	Breast cancer	Breast cancer	Overall survival	0	1643
BT_O11	GPL570	GSE48390	GSM1176913	Breast cancer	Breast cancer	Overall survival	0	1522
BT_O11	GPL570	GSE48390	GSM1176914	Breast cancer	Breast cancer	Overall survival	0	1489
BT_O11	GPL570	GSE48390	GSM1176915	Breast cancer	Breast cancer	Overall survival	0	1398
BT_O11	GPL570	GSE48390	GSM1176916	Breast cancer	Breast cancer	Overall survival	1	394
BT_O11	GPL570	GSE48390	GSM1176917	Breast cancer	Breast cancer	Overall survival	0	1672
BT_O11	GPL570	GSE48390	GSM1176918	Breast cancer	Breast cancer	Overall survival	0	1672
BT_O11	GPL570	GSE48390	GSM1176919	Breast cancer	Breast cancer	Overall survival	0	1672
BT_O11	GPL570	GSE48390	GSM1176920	Breast cancer	Breast cancer	Overall survival	1	427
BT_O11	GPL570	GSE48390	GSM1176921	Breast cancer	Breast cancer	Overall survival	0	1551
BT_O11	GPL570	GSE48390	GSM1176922	Breast cancer	Breast cancer	Overall survival	0	1551
BT_O11	GPL570	GSE48390	GSM1176923	Breast cancer	Breast cancer	Overall survival	0	942
BT_O11	GPL570	GSE48390	GSM1176924	Breast cancer	Breast cancer	Overall survival	0	1643
BT_O11	GPL570	GSE48390	GSM1176925	Breast cancer	Breast cancer	Overall survival	0	1643
BT_O11	GPL570	GSE48390	GSM1176926	Breast cancer	Breast cancer	Overall survival	1	1248
BT_O11	GPL570	GSE48390	GSM1176927	Breast cancer	Breast cancer	Overall survival	0	1398
BT_O11	GPL570	GSE48390	GSM1176928	Breast cancer	Breast cancer	Overall survival	0	1033
BT_O11	GPL570	GSE48390	GSM1176929	Breast cancer	Breast cancer	Overall survival	0	1672
BT_O11	GPL570	GSE48390	GSM1176930	Breast cancer	Breast cancer	Overall survival	0	1522
BT_O11	GPL570	GSE48390	GSM1176931	Breast cancer	Breast cancer	Overall survival	1	792
BT_O11	GPL570	GSE48390	GSM1176932	Breast cancer	Breast cancer	Overall survival	0	1066
BT_O11	GPL570	GSE48390	GSM1176933	Breast cancer	Breast cancer	Overall survival	0	1705
BT_O11	GPL570	GSE48390	GSM1176934	Breast cancer	Breast cancer	Overall survival	0	183
BT_O11	GPL570	GSE48390	GSM1176935	Breast cancer	Breast cancer	Overall survival	0	1522
BT_O11	GPL570	GSE48390	GSM1176936	Breast cancer	Breast cancer	Overall survival	0	1643
BT_O11	GPL570	GSE48390	GSM1176937	Breast cancer	Breast cancer	Overall survival	0	1643
BT_O11	GPL570	GSE48390	GSM1176938	Breast cancer	Breast cancer	Overall survival	0	1613
BT_O11	GPL570	GSE48390	GSM1176939	Breast cancer	Breast cancer	Overall survival	0	1580
BT_O11	GPL570	GSE48390	GSM1176940	Breast cancer	Breast cancer	Overall survival	0	1551
BT_O11	GPL570	GSE48390	GSM1176941	Breast cancer	Breast cancer	Overall survival	0	1095
BT_O11	GPL570	GSE48390	GSM1176942	Breast cancer	Breast cancer	Overall survival	0	1066
BT_O11	GPL570	GSE48390	GSM1176943	Breast cancer	Breast cancer	Overall survival	0	1705
BT_O11	GPL570	GSE48390	GSM1176944	Breast cancer	Breast cancer	Overall survival	0	913
BT_O11	GPL570	GSE48390	GSM1176945	Breast cancer	Breast cancer	Overall survival	0	1489
BT_O11	GPL570	GSE48390	GSM1176946	Breast cancer	Breast cancer	Overall survival	0	1551
BT_O11	GPL570	GSE48390	GSM1176947	Breast cancer	Breast cancer	Overall survival	0	29
BT_O11	GPL570	GSE48390	GSM1176948	Breast cancer	Breast cancer	Overall survival	0	1186
BT_O11	GPL570	GSE48390	GSM1176949	Breast cancer	Breast cancer	Overall survival	0	1580
BT_O11	GPL570	GSE48390	GSM1176950	Breast cancer	Breast cancer	Overall survival	1	883
BT_O11	GPL570	GSE48390	GSM1176951	Breast cancer	Breast cancer	Overall survival	0	1580
BT_O11	GPL570	GSE48390	GSM1176952	Breast cancer	Breast cancer	Overall survival	0	1551
BT_O11	GPL570	GSE48390	GSM1176953	Breast cancer	Breast cancer	Overall survival	0	1460
BT_O12	GPL6244	GSE37751	GSM927010	Breast cancer	Breast cancer	Overall survival	1	2910
BT_O12	GPL6244	GSE37751	GSM927011	Breast cancer	Breast cancer	Overall survival	0	4440
BT_O12	GPL6244	GSE37751	GSM927012	Breast cancer	Breast cancer	Overall survival	1	300
BT_O12	GPL6244	GSE37751	GSM927013	Breast cancer	Breast cancer	Overall survival	0	4050
BT_O12	GPL6244	GSE37751	GSM927014	Breast cancer	Breast cancer	Overall survival	1	30
BT_O12	GPL6244	GSE37751	GSM927015	Breast cancer	Breast cancer	Overall survival	1	300
BT_O12	GPL6244	GSE37751	GSM927016	Breast cancer	Breast cancer	Overall survival	1	1680
BT_O12	GPL6244	GSE37751	GSM927017	Breast cancer	Breast cancer	Overall survival	0	3960
BT_O12	GPL6244	GSE37751	GSM927018	Breast cancer	Breast cancer	Overall survival	1	690
BT_O12	GPL6244	GSE37751	GSM927019	Breast cancer	Breast cancer	Overall survival	1	390
BT_O12	GPL6244	GSE37751	GSM927020	Breast cancer	Breast cancer	Overall survival	0	3630
BT_O12	GPL6244	GSE37751	GSM927021	Breast cancer	Breast cancer	Overall survival	1	870
BT_O12	GPL6244	GSE37751	GSM927022	Breast cancer	Breast cancer	Overall survival	0	3600
BT_O12	GPL6244	GSE37751	GSM927023	Breast cancer	Breast cancer	Overall survival	1	1170
BT_O12	GPL6244	GSE37751	GSM927024	Breast cancer	Breast cancer	Overall survival	1	2880
BT_O12	GPL6244	GSE37751	GSM927025	Breast cancer	Breast cancer	Overall survival	1	360
BT_O12	GPL6244	GSE37751	GSM927026	Breast cancer	Breast cancer	Overall survival	0	3330
BT_O12	GPL6244	GSE37751	GSM927027	Breast cancer	Breast cancer	Overall survival	1	1440
BT_O12	GPL6244	GSE37751	GSM927028	Breast cancer	Breast cancer	Overall survival	0	3270
BT_O12	GPL6244	GSE37751	GSM927029	Breast cancer	Breast cancer	Overall survival	0	2970
BT_O12	GPL6244	GSE37751	GSM927030	Breast cancer	Breast cancer	Overall survival	0	2940
BT_O12	GPL6244	GSE37751	GSM927031	Breast cancer	Breast cancer	Overall survival	1	450
BT_O12	GPL6244	GSE37751	GSM927032	Breast cancer	Breast cancer	Overall survival	1	2100
BT_O12	GPL6244	GSE37751	GSM927033	Breast cancer	Breast cancer	Overall survival	0	2820
BT_O12	GPL6244	GSE37751	GSM927035	Breast cancer	Breast cancer	Overall survival	0	2700
BT_O12	GPL6244	GSE37751	GSM927036	Breast cancer	Breast cancer	Overall survival	0	2730
BT_O12	GPL6244	GSE37751	GSM927037	Breast cancer	Breast cancer	Overall survival	1	330
BT_O12	GPL6244	GSE37751	GSM927038	Breast cancer	Breast cancer	Overall survival	0	2550
BT_O12	GPL6244	GSE37751	GSM927039	Breast cancer	Breast cancer	Overall survival	1	1440
BT_O12	GPL6244	GSE37751	GSM927040	Breast cancer	Breast cancer	Overall survival	1	870
BT_O12	GPL6244	GSE37751	GSM927041	Breast cancer	Breast cancer	Overall survival	1	510
BT_O12	GPL6244	GSE37751	GSM927042	Breast cancer	Breast cancer	Overall survival	0	2580
BT_O12	GPL6244	GSE37751	GSM927043	Breast cancer	Breast cancer	Overall survival	0	2490
BT_O12	GPL6244	GSE37751	GSM927044	Breast cancer	Breast cancer	Overall survival	1	390
BT_O12	GPL6244	GSE37751	GSM927045	Breast cancer	Breast cancer	Overall survival	0	2760
BT_O12	GPL6244	GSE37751	GSM927046	Breast cancer	Breast cancer	Overall survival	1	720
BT_O12	GPL6244	GSE37751	GSM927047	Breast cancer	Breast cancer	Overall survival	0	2400
BT_O12	GPL6244	GSE37751	GSM927048	Breast cancer	Breast cancer	Overall survival	0	2280
BT_O12	GPL6244	GSE37751	GSM927049	Breast cancer	Breast cancer	Overall survival	1	480
BT_O12	GPL6244	GSE37751	GSM927050	Breast cancer	Breast cancer	Overall survival	0	2130
BT_O12	GPL6244	GSE37751	GSM927051	Breast cancer	Breast cancer	Overall survival	1	1140
BT_O12	GPL6244	GSE37751	GSM927052	Breast cancer	Breast cancer	Overall survival	0	1890
BT_O12	GPL6244	GSE37751	GSM927053	Breast cancer	Breast cancer	Overall survival	0	1740
BT_O12	GPL6244	GSE37751	GSM927054	Breast cancer	Breast cancer	Overall survival	0	1710
BT_O12	GPL6244	GSE37751	GSM927055	Breast cancer	Breast cancer	Overall survival	0	1650
BT_O12	GPL6244	GSE37751	GSM927056	Breast cancer	Breast cancer	Overall survival	0	1650
BT_O12	GPL6244	GSE37751	GSM927057	Breast cancer	Breast cancer	Overall survival	0	1620
BT_O12	GPL6244	GSE37751	GSM927058	Breast cancer	Breast cancer	Overall survival	0	1530
BT_O12	GPL6244	GSE37751	GSM927059	Breast cancer	Breast cancer	Overall survival	1	1080
BT_O12	GPL6244	GSE37751	GSM927060	Breast cancer	Breast cancer	Overall survival	1	300
BT_O12	GPL6244	GSE37751	GSM927061	Breast cancer	Breast cancer	Overall survival	0	1500
BT_O12	GPL6244	GSE37751	GSM927062	Breast cancer	Breast cancer	Overall survival	0	1500
BT_O12	GPL6244	GSE37751	GSM927063	Breast cancer	Breast cancer	Overall survival	0	1500
BT_O12	GPL6244	GSE37751	GSM927064	Breast cancer	Breast cancer	Overall survival	0	1440
BT_O12	GPL6244	GSE37751	GSM927065	Breast cancer	Breast cancer	Overall survival	0	1440
BT_O12	GPL6244	GSE37751	GSM927066	Breast cancer	Breast cancer	Overall survival	0	1410
BT_O12	GPL6244	GSE37751	GSM927067	Breast cancer	Breast cancer	Overall survival	0	1290
BT_O12	GPL6244	GSE37751	GSM927068	Breast cancer	Breast cancer	Overall survival	0	1230
BT_O12	GPL6244	GSE37751	GSM927069	Breast cancer	Breast cancer	Overall survival	0	1140
BT_O12	GPL6244	GSE37751	GSM927070	Breast cancer	Breast cancer	Overall survival	1	810
BT_O13	GPL570	GSE42568	GSM1045208	Breast cancer	Breast cancer	Overall survival	0	3026
BT_O13	GPL570	GSE42568	GSM1045209	Breast cancer	Breast cancer	Overall survival	1	755
BT_O13	GPL570	GSE42568	GSM1045210	Breast cancer	Breast cancer	Overall survival	0	3014
BT_O13	GPL570	GSE42568	GSM1045211	Breast cancer	Breast cancer	Overall survival	1	1726
BT_O13	GPL570	GSE42568	GSM1045212	Breast cancer	Breast cancer	Overall survival	0	2225
BT_O13	GPL570	GSE42568	GSM1045213	Breast cancer	Breast cancer	Overall survival	1	285
BT_O13	GPL570	GSE42568	GSM1045214	Breast cancer	Breast cancer	Overall survival	0	2138
BT_O13	GPL570	GSE42568	GSM1045215	Breast cancer	Breast cancer	Overall survival	0	2449
BT_O13	GPL570	GSE42568	GSM1045216	Breast cancer	Breast cancer	Overall survival	1	2456
BT_O13	GPL570	GSE42568	GSM1045217	Breast cancer	Breast cancer	Overall survival	1	420
BT_O13	GPL570	GSE42568	GSM1045218	Breast cancer	Breast cancer	Overall survival	1	1110
BT_O13	GPL570	GSE42568	GSM1045219	Breast cancer	Breast cancer	Overall survival	1	488
BT_O13	GPL570	GSE42568	GSM1045220	Breast cancer	Breast cancer	Overall survival	0	2718
BT_O13	GPL570	GSE42568	GSM1045221	Breast cancer	Breast cancer	Overall survival	1	767
BT_O13	GPL570	GSE42568	GSM1045222	Breast cancer	Breast cancer	Overall survival	1	1216
BT_O13	GPL570	GSE42568	GSM1045223	Breast cancer	Breast cancer	Overall survival	0	2462
BT_O13	GPL570	GSE42568	GSM1045224	Breast cancer	Breast cancer	Overall survival	1	1862
BT_O13	GPL570	GSE42568	GSM1045225	Breast cancer	Breast cancer	Overall survival	1	1223
BT_O13	GPL570	GSE42568	GSM1045226	Breast cancer	Breast cancer	Overall survival	0	3019
BT_O13	GPL570	GSE42568	GSM1045227	Breast cancer	Breast cancer	Overall survival	1	155
BT_O13	GPL570	GSE42568	GSM1045228	Breast cancer	Breast cancer	Overall survival	0	947
BT_O13	GPL570	GSE42568	GSM1045229	Breast cancer	Breast cancer	Overall survival	1	552
BT_O13	GPL570	GSE42568	GSM1045230	Breast cancer	Breast cancer	Overall survival	0	2903
BT_O13	GPL570	GSE42568	GSM1045231	Breast cancer	Breast cancer	Overall survival	0	2438
BT_O13	GPL570	GSE42568	GSM1045232	Breast cancer	Breast cancer	Overall survival	0	1627
BT_O13	GPL570	GSE42568	GSM1045233	Breast cancer	Breast cancer	Overall survival	1	1708
BT_O13	GPL570	GSE42568	GSM1045234	Breast cancer	Breast cancer	Overall survival	0	2237
BT_O13	GPL570	GSE42568	GSM1045235	Breast cancer	Breast cancer	Overall survival	1	845
BT_O13	GPL570	GSE42568	GSM1045236	Breast cancer	Breast cancer	Overall survival	0	2957
BT_O13	GPL570	GSE42568	GSM1045237	Breast cancer	Breast cancer	Overall survival	1	913
BT_O13	GPL570	GSE42568	GSM1045238	Breast cancer	Breast cancer	Overall survival	1	138
BT_O13	GPL570	GSE42568	GSM1045239	Breast cancer	Breast cancer	Overall survival	1	1058
BT_O13	GPL570	GSE42568	GSM1045240	Breast cancer	Breast cancer	Overall survival	0	2759
BT_O13	GPL570	GSE42568	GSM1045241	Breast cancer	Breast cancer	Overall survival	0	2764
BT_O13	GPL570	GSE42568	GSM1045242	Breast cancer	Breast cancer	Overall survival	1	1157
BT_O13	GPL570	GSE42568	GSM1045243	Breast cancer	Breast cancer	Overall survival	0	546
BT_O13	GPL570	GSE42568	GSM1045244	Breast cancer	Breast cancer	Overall survival	0	2582
BT_O13	GPL570	GSE42568	GSM1045245	Breast cancer	Breast cancer	Overall survival	0	2460
BT_O13	GPL570	GSE42568	GSM1045246	Breast cancer	Breast cancer	Overall survival	1	1338
BT_O13	GPL570	GSE42568	GSM1045247	Breast cancer	Breast cancer	Overall survival	0	2626
BT_O13	GPL570	GSE42568	GSM1045248	Breast cancer	Breast cancer	Overall survival	0	2948
BT_O13	GPL570	GSE42568	GSM1045249	Breast cancer	Breast cancer	Overall survival	0	2416
BT_O13	GPL570	GSE42568	GSM1045250	Breast cancer	Breast cancer	Overall survival	1	194
BT_O13	GPL570	GSE42568	GSM1045251	Breast cancer	Breast cancer	Overall survival	0	2897
BT_O13	GPL570	GSE42568	GSM1045252	Breast cancer	Breast cancer	Overall survival	0	2899
BT_O13	GPL570	GSE42568	GSM1045253	Breast cancer	Breast cancer	Overall survival	0	2829
BT_O13	GPL570	GSE42568	GSM1045254	Breast cancer	Breast cancer	Overall survival	0	2785
BT_O13	GPL570	GSE42568	GSM1045255	Breast cancer	Breast cancer	Overall survival	0	2740
BT_O13	GPL570	GSE42568	GSM1045256	Breast cancer	Breast cancer	Overall survival	0	1235
BT_O13	GPL570	GSE42568	GSM1045257	Breast cancer	Breast cancer	Overall survival	1	2092
BT_O13	GPL570	GSE42568	GSM1045258	Breast cancer	Breast cancer	Overall survival	0	2535
BT_O13	GPL570	GSE42568	GSM1045259	Breast cancer	Breast cancer	Overall survival	0	2211
BT_O13	GPL570	GSE42568	GSM1045260	Breast cancer	Breast cancer	Overall survival	1	2275
BT_O13	GPL570	GSE42568	GSM1045261	Breast cancer	Breast cancer	Overall survival	1	390
BT_O13	GPL570	GSE42568	GSM1045262	Breast cancer	Breast cancer	Overall survival	0	2184
BT_O13	GPL570	GSE42568	GSM1045263	Breast cancer	Breast cancer	Overall survival	1	919
BT_O13	GPL570	GSE42568	GSM1045264	Breast cancer	Breast cancer	Overall survival	0	917
BT_O13	GPL570	GSE42568	GSM1045265	Breast cancer	Breast cancer	Overall survival	0	2758
BT_O13	GPL570	GSE42568	GSM1045266	Breast cancer	Breast cancer	Overall survival	0	977
BT_O13	GPL570	GSE42568	GSM1045267	Breast cancer	Breast cancer	Overall survival	0	1997
BT_O13	GPL570	GSE42568	GSM1045268	Breast cancer	Breast cancer	Overall survival	0	1854
BT_O13	GPL570	GSE42568	GSM1045269	Breast cancer	Breast cancer	Overall survival	0	1793
BT_O13	GPL570	GSE42568	GSM1045270	Breast cancer	Breast cancer	Overall survival	1	545
BT_O13	GPL570	GSE42568	GSM1045271	Breast cancer	Breast cancer	Overall survival	1	1409
BT_O13	GPL570	GSE42568	GSM1045272	Breast cancer	Breast cancer	Overall survival	0	2943
BT_O13	GPL570	GSE42568	GSM1045273	Breast cancer	Breast cancer	Overall survival	1	1044
BT_O13	GPL570	GSE42568	GSM1045274	Breast cancer	Breast cancer	Overall survival	0	2489
BT_O13	GPL570	GSE42568	GSM1045275	Breast cancer	Breast cancer	Overall survival	1	1332
BT_O13	GPL570	GSE42568	GSM1045276	Breast cancer	Breast cancer	Overall survival	1	1915
BT_O13	GPL570	GSE42568	GSM1045277	Breast cancer	Breast cancer	Overall survival	0	1950
BT_O13	GPL570	GSE42568	GSM1045278	Breast cancer	Breast cancer	Overall survival	1	1080
BT_O13	GPL570	GSE42568	GSM1045279	Breast cancer	Breast cancer	Overall survival	0	2266
BT_O13	GPL570	GSE42568	GSM1045280	Breast cancer	Breast cancer	Overall survival	0	1692
BT_O13	GPL570	GSE42568	GSM1045281	Breast cancer	Breast cancer	Overall survival	0	2302
BT_O13	GPL570	GSE42568	GSM1045282	Breast cancer	Breast cancer	Overall survival	1	365
BT_O13	GPL570	GSE42568	GSM1045283	Breast cancer	Breast cancer	Overall survival	0	2211
BT_O13	GPL570	GSE42568	GSM1045284	Breast cancer	Breast cancer	Overall survival	0	2344
BT_O13	GPL570	GSE42568	GSM1045285	Breast cancer	Breast cancer	Overall survival	0	1864
BT_O13	GPL570	GSE42568	GSM1045286	Breast cancer	Breast cancer	Overall survival	0	2484
BT_O13	GPL570	GSE42568	GSM1045287	Breast cancer	Breast cancer	Overall survival	1	526
BT_O13	GPL570	GSE42568	GSM1045288	Breast cancer	Breast cancer	Overall survival	0	2955
BT_O13	GPL570	GSE42568	GSM1045289	Breast cancer	Breast cancer	Overall survival	0	2650
BT_O13	GPL570	GSE42568	GSM1045290	Breast cancer	Breast cancer	Overall survival	0	2384
BT_O13	GPL570	GSE42568	GSM1045291	Breast cancer	Breast cancer	Overall survival	0	2689
BT_O13	GPL570	GSE42568	GSM1045292	Breast cancer	Breast cancer	Overall survival	0	2641
BT_O13	GPL570	GSE42568	GSM1045293	Breast cancer	Breast cancer	Overall survival	0	423
BT_O13	GPL570	GSE42568	GSM1045294	Breast cancer	Breast cancer	Overall survival	0	1682
BT_O13	GPL570	GSE42568	GSM1045295	Breast cancer	Breast cancer	Overall survival	0	2052
BT_O13	GPL570	GSE42568	GSM1045296	Breast cancer	Breast cancer	Overall survival	0	475
BT_O13	GPL570	GSE42568	GSM1045297	Breast cancer	Breast cancer	Overall survival	0	2243
BT_O13	GPL570	GSE42568	GSM1045298	Breast cancer	Breast cancer	Overall survival	0	2197
BT_O13	GPL570	GSE42568	GSM1045299	Breast cancer	Breast cancer	Overall survival	0	2576
BT_O13	GPL570	GSE42568	GSM1045300	Breast cancer	Breast cancer	Overall survival	0	2556
BT_O13	GPL570	GSE42568	GSM1045301	Breast cancer	Breast cancer	Overall survival	0	2225
BT_O13	GPL570	GSE42568	GSM1045302	Breast cancer	Breast cancer	Overall survival	1	2022
BT_O13	GPL570	GSE42568	GSM1045303	Breast cancer	Breast cancer	Overall survival	0	2713
BT_O13	GPL570	GSE42568	GSM1045304	Breast cancer	Breast cancer	Overall survival	0	2790
BT_O13	GPL570	GSE42568	GSM1045305	Breast cancer	Breast cancer	Overall survival	0	2622
BT_O13	GPL570	GSE42568	GSM1045306	Breast cancer	Breast cancer	Overall survival	0	2909
BT_O13	GPL570	GSE42568	GSM1045307	Breast cancer	Breast cancer	Overall survival	0	2952
BT_O13	GPL570	GSE42568	GSM1045308	Breast cancer	Breast cancer	Overall survival	0	2989
BT_O13	GPL570	GSE42568	GSM1045309	Breast cancer	Breast cancer	Overall survival	0	2105
BT_O13	GPL570	GSE42568	GSM1045310	Breast cancer	Breast cancer	Overall survival	1	927
BT_O13	GPL570	GSE42568	GSM1045311	Breast cancer	Breast cancer	Overall survival	0	2962
BT_O14	GPL570	GSE42568	GSM1045208	Breast cancer	Breast cancer	Relapse-free survival	0	3026
BT_O14	GPL570	GSE42568	GSM1045209	Breast cancer	Breast cancer	Relapse-free survival	1	755
BT_O14	GPL570	GSE42568	GSM1045210	Breast cancer	Breast cancer	Relapse-free survival	0	3014
BT_O14	GPL570	GSE42568	GSM1045211	Breast cancer	Breast cancer	Relapse-free survival	1	406
BT_O14	GPL570	GSE42568	GSM1045212	Breast cancer	Breast cancer	Relapse-free survival	0	2225
BT_O14	GPL570	GSE42568	GSM1045213	Breast cancer	Breast cancer	Relapse-free survival	1	252
BT_O14	GPL570	GSE42568	GSM1045214	Breast cancer	Breast cancer	Relapse-free survival	0	2138
BT_O14	GPL570	GSE42568	GSM1045215	Breast cancer	Breast cancer	Relapse-free survival	0	2449
BT_O14	GPL570	GSE42568	GSM1045216	Breast cancer	Breast cancer	Relapse-free survival	1	2080
BT_O14	GPL570	GSE42568	GSM1045217	Breast cancer	Breast cancer	Relapse-free survival	1	346
BT_O14	GPL570	GSE42568	GSM1045218	Breast cancer	Breast cancer	Relapse-free survival	1	1110
BT_O14	GPL570	GSE42568	GSM1045219	Breast cancer	Breast cancer	Relapse-free survival	1	332
BT_O14	GPL570	GSE42568	GSM1045220	Breast cancer	Breast cancer	Relapse-free survival	1	368
BT_O14	GPL570	GSE42568	GSM1045221	Breast cancer	Breast cancer	Relapse-free survival	1	362
BT_O14	GPL570	GSE42568	GSM1045222	Breast cancer	Breast cancer	Relapse-free survival	1	1216
BT_O14	GPL570	GSE42568	GSM1045223	Breast cancer	Breast cancer	Relapse-free survival	0	2462
BT_O14	GPL570	GSE42568	GSM1045224	Breast cancer	Breast cancer	Relapse-free survival	1	888
BT_O14	GPL570	GSE42568	GSM1045225	Breast cancer	Breast cancer	Relapse-free survival	1	212
BT_O14	GPL570	GSE42568	GSM1045226	Breast cancer	Breast cancer	Relapse-free survival	0	3019
BT_O14	GPL570	GSE42568	GSM1045227	Breast cancer	Breast cancer	Relapse-free survival	1	155
BT_O14	GPL570	GSE42568	GSM1045228	Breast cancer	Breast cancer	Relapse-free survival	0	947
BT_O14	GPL570	GSE42568	GSM1045229	Breast cancer	Breast cancer	Relapse-free survival	1	552
BT_O14	GPL570	GSE42568	GSM1045230	Breast cancer	Breast cancer	Relapse-free survival	1	1641
BT_O14	GPL570	GSE42568	GSM1045231	Breast cancer	Breast cancer	Relapse-free survival	0	2438
BT_O14	GPL570	GSE42568	GSM1045232	Breast cancer	Breast cancer	Relapse-free survival	0	1627
BT_O14	GPL570	GSE42568	GSM1045233	Breast cancer	Breast cancer	Relapse-free survival	1	1224
BT_O14	GPL570	GSE42568	GSM1045234	Breast cancer	Breast cancer	Relapse-free survival	0	2237
BT_O14	GPL570	GSE42568	GSM1045235	Breast cancer	Breast cancer	Relapse-free survival	1	845
BT_O14	GPL570	GSE42568	GSM1045236	Breast cancer	Breast cancer	Relapse-free survival	1	602
BT_O14	GPL570	GSE42568	GSM1045237	Breast cancer	Breast cancer	Relapse-free survival	1	577
BT_O14	GPL570	GSE42568	GSM1045238	Breast cancer	Breast cancer	Relapse-free survival	1	138
BT_O14	GPL570	GSE42568	GSM1045239	Breast cancer	Breast cancer	Relapse-free survival	1	459
BT_O14	GPL570	GSE42568	GSM1045240	Breast cancer	Breast cancer	Relapse-free survival	0	2759
BT_O14	GPL570	GSE42568	GSM1045241	Breast cancer	Breast cancer	Relapse-free survival	1	2405
BT_O14	GPL570	GSE42568	GSM1045242	Breast cancer	Breast cancer	Relapse-free survival	1	1157
BT_O14	GPL570	GSE42568	GSM1045243	Breast cancer	Breast cancer	Relapse-free survival	0	546
BT_O14	GPL570	GSE42568	GSM1045244	Breast cancer	Breast cancer	Relapse-free survival	0	2582
BT_O14	GPL570	GSE42568	GSM1045245	Breast cancer	Breast cancer	Relapse-free survival	0	2460
BT_O14	GPL570	GSE42568	GSM1045246	Breast cancer	Breast cancer	Relapse-free survival	1	978
BT_O14	GPL570	GSE42568	GSM1045247	Breast cancer	Breast cancer	Relapse-free survival	0	2626
BT_O14	GPL570	GSE42568	GSM1045248	Breast cancer	Breast cancer	Relapse-free survival	0	2948
BT_O14	GPL570	GSE42568	GSM1045249	Breast cancer	Breast cancer	Relapse-free survival	0	2416
BT_O14	GPL570	GSE42568	GSM1045250	Breast cancer	Breast cancer	Relapse-free survival	1	124
BT_O14	GPL570	GSE42568	GSM1045251	Breast cancer	Breast cancer	Relapse-free survival	0	2897
BT_O14	GPL570	GSE42568	GSM1045252	Breast cancer	Breast cancer	Relapse-free survival	0	2899
BT_O14	GPL570	GSE42568	GSM1045253	Breast cancer	Breast cancer	Relapse-free survival	0	2829
BT_O14	GPL570	GSE42568	GSM1045254	Breast cancer	Breast cancer	Relapse-free survival	1	2561
BT_O14	GPL570	GSE42568	GSM1045255	Breast cancer	Breast cancer	Relapse-free survival	0	2740
BT_O14	GPL570	GSE42568	GSM1045256	Breast cancer	Breast cancer	Relapse-free survival	0	1235
BT_O14	GPL570	GSE42568	GSM1045257	Breast cancer	Breast cancer	Relapse-free survival	1	2092
BT_O14	GPL570	GSE42568	GSM1045258	Breast cancer	Breast cancer	Relapse-free survival	0	2535
BT_O14	GPL570	GSE42568	GSM1045259	Breast cancer	Breast cancer	Relapse-free survival	0	2211
BT_O14	GPL570	GSE42568	GSM1045260	Breast cancer	Breast cancer	Relapse-free survival	1	2275
BT_O14	GPL570	GSE42568	GSM1045261	Breast cancer	Breast cancer	Relapse-free survival	1	390
BT_O14	GPL570	GSE42568	GSM1045262	Breast cancer	Breast cancer	Relapse-free survival	0	2184
BT_O14	GPL570	GSE42568	GSM1045263	Breast cancer	Breast cancer	Relapse-free survival	1	436
BT_O14	GPL570	GSE42568	GSM1045264	Breast cancer	Breast cancer	Relapse-free survival	1	634
BT_O14	GPL570	GSE42568	GSM1045265	Breast cancer	Breast cancer	Relapse-free survival	0	2758
BT_O14	GPL570	GSE42568	GSM1045266	Breast cancer	Breast cancer	Relapse-free survival	0	977
BT_O14	GPL570	GSE42568	GSM1045267	Breast cancer	Breast cancer	Relapse-free survival	1	365
BT_O14	GPL570	GSE42568	GSM1045268	Breast cancer	Breast cancer	Relapse-free survival	0	1854
BT_O14	GPL570	GSE42568	GSM1045269	Breast cancer	Breast cancer	Relapse-free survival	0	1793
BT_O14	GPL570	GSE42568	GSM1045270	Breast cancer	Breast cancer	Relapse-free survival	1	545
BT_O14	GPL570	GSE42568	GSM1045271	Breast cancer	Breast cancer	Relapse-free survival	1	725
BT_O14	GPL570	GSE42568	GSM1045272	Breast cancer	Breast cancer	Relapse-free survival	0	2943
BT_O14	GPL570	GSE42568	GSM1045273	Breast cancer	Breast cancer	Relapse-free survival	1	421
BT_O14	GPL570	GSE42568	GSM1045274	Breast cancer	Breast cancer	Relapse-free survival	0	2489
BT_O14	GPL570	GSE42568	GSM1045275	Breast cancer	Breast cancer	Relapse-free survival	1	1332
BT_O14	GPL570	GSE42568	GSM1045276	Breast cancer	Breast cancer	Relapse-free survival	1	755
BT_O14	GPL570	GSE42568	GSM1045277	Breast cancer	Breast cancer	Relapse-free survival	0	1950
BT_O14	GPL570	GSE42568	GSM1045278	Breast cancer	Breast cancer	Relapse-free survival	1	276
BT_O14	GPL570	GSE42568	GSM1045279	Breast cancer	Breast cancer	Relapse-free survival	0	2266
BT_O14	GPL570	GSE42568	GSM1045280	Breast cancer	Breast cancer	Relapse-free survival	0	1692
BT_O14	GPL570	GSE42568	GSM1045281	Breast cancer	Breast cancer	Relapse-free survival	0	2302
BT_O14	GPL570	GSE42568	GSM1045282	Breast cancer	Breast cancer	Relapse-free survival	1	365
BT_O14	GPL570	GSE42568	GSM1045283	Breast cancer	Breast cancer	Relapse-free survival	0	2211
BT_O14	GPL570	GSE42568	GSM1045284	Breast cancer	Breast cancer	Relapse-free survival	1	1980
BT_O14	GPL570	GSE42568	GSM1045285	Breast cancer	Breast cancer	Relapse-free survival	1	1864
BT_O14	GPL570	GSE42568	GSM1045286	Breast cancer	Breast cancer	Relapse-free survival	0	2484
BT_O14	GPL570	GSE42568	GSM1045287	Breast cancer	Breast cancer	Relapse-free survival	1	424
BT_O14	GPL570	GSE42568	GSM1045288	Breast cancer	Breast cancer	Relapse-free survival	0	2955
BT_O14	GPL570	GSE42568	GSM1045289	Breast cancer	Breast cancer	Relapse-free survival	1	84
BT_O14	GPL570	GSE42568	GSM1045290	Breast cancer	Breast cancer	Relapse-free survival	0	2384
BT_O14	GPL570	GSE42568	GSM1045291	Breast cancer	Breast cancer	Relapse-free survival	0	2689
BT_O14	GPL570	GSE42568	GSM1045292	Breast cancer	Breast cancer	Relapse-free survival	0	2641
BT_O14	GPL570	GSE42568	GSM1045293	Breast cancer	Breast cancer	Relapse-free survival	0	423
BT_O14	GPL570	GSE42568	GSM1045294	Breast cancer	Breast cancer	Relapse-free survival	0	1682
BT_O14	GPL570	GSE42568	GSM1045295	Breast cancer	Breast cancer	Relapse-free survival	0	2052
BT_O14	GPL570	GSE42568	GSM1045296	Breast cancer	Breast cancer	Relapse-free survival	1	288
BT_O14	GPL570	GSE42568	GSM1045297	Breast cancer	Breast cancer	Relapse-free survival	0	2243
BT_O14	GPL570	GSE42568	GSM1045298	Breast cancer	Breast cancer	Relapse-free survival	0	2197
BT_O14	GPL570	GSE42568	GSM1045299	Breast cancer	Breast cancer	Relapse-free survival	0	2576
BT_O14	GPL570	GSE42568	GSM1045300	Breast cancer	Breast cancer	Relapse-free survival	0	2556
BT_O14	GPL570	GSE42568	GSM1045301	Breast cancer	Breast cancer	Relapse-free survival	0	2225
BT_O14	GPL570	GSE42568	GSM1045302	Breast cancer	Breast cancer	Relapse-free survival	1	441
BT_O14	GPL570	GSE42568	GSM1045303	Breast cancer	Breast cancer	Relapse-free survival	0	2713
BT_O14	GPL570	GSE42568	GSM1045304	Breast cancer	Breast cancer	Relapse-free survival	0	2790
BT_O14	GPL570	GSE42568	GSM1045305	Breast cancer	Breast cancer	Relapse-free survival	0	2622
BT_O14	GPL570	GSE42568	GSM1045306	Breast cancer	Breast cancer	Relapse-free survival	1	634
BT_O14	GPL570	GSE42568	GSM1045307	Breast cancer	Breast cancer	Relapse-free survival	0	2952
BT_O14	GPL570	GSE42568	GSM1045308	Breast cancer	Breast cancer	Relapse-free survival	1	1209
BT_O14	GPL570	GSE42568	GSM1045309	Breast cancer	Breast cancer	Relapse-free survival	0	2105
BT_O14	GPL570	GSE42568	GSM1045310	Breast cancer	Breast cancer	Relapse-free survival	1	639
BT_O14	GPL570	GSE42568	GSM1045311	Breast cancer	Breast cancer	Relapse-free survival	0	2962
BT_O15	GPL570	GSE20711	GSM519722	Breast cancer	Breast cancer	Overall survival	0	3022
BT_O15	GPL570	GSE20711	GSM519723	Breast cancer	Breast cancer	Overall survival	1	1237
BT_O15	GPL570	GSE20711	GSM519724	Breast cancer	Breast cancer	Overall survival	0	3154
BT_O15	GPL570	GSE20711	GSM519725	Breast cancer	Breast cancer	Overall survival	0	3066
BT_O15	GPL570	GSE20711	GSM519726	Breast cancer	Breast cancer	Overall survival	0	2632
BT_O15	GPL570	GSE20711	GSM519727	Breast cancer	Breast cancer	Overall survival	0	2989
BT_O15	GPL570	GSE20711	GSM519728	Breast cancer	Breast cancer	Overall survival	1	920
BT_O15	GPL570	GSE20711	GSM519729	Breast cancer	Breast cancer	Overall survival	0	3037
BT_O15	GPL570	GSE20711	GSM519730	Breast cancer	Breast cancer	Overall survival	0	3219
BT_O15	GPL570	GSE20711	GSM519731	Breast cancer	Breast cancer	Overall survival	0	3296
BT_O15	GPL570	GSE20711	GSM519732	Breast cancer	Breast cancer	Overall survival	0	3278
BT_O15	GPL570	GSE20711	GSM519733	Breast cancer	Breast cancer	Overall survival	0	2778
BT_O15	GPL570	GSE20711	GSM519734	Breast cancer	Breast cancer	Overall survival	0	3449
BT_O15	GPL570	GSE20711	GSM519735	Breast cancer	Breast cancer	Overall survival	0	3402
BT_O15	GPL570	GSE20711	GSM519736	Breast cancer	Breast cancer	Overall survival	0	2216
BT_O15	GPL570	GSE20711	GSM519737	Breast cancer	Breast cancer	Overall survival	1	1486
BT_O15	GPL570	GSE20711	GSM519738	Breast cancer	Breast cancer	Overall survival	0	3227
BT_O15	GPL570	GSE20711	GSM519739	Breast cancer	Breast cancer	Overall survival	0	2931
BT_O15	GPL570	GSE20711	GSM519740	Breast cancer	Breast cancer	Overall survival	0	675
BT_O15	GPL570	GSE20711	GSM519741	Breast cancer	Breast cancer	Overall survival	1	1821
BT_O15	GPL570	GSE20711	GSM519742	Breast cancer	Breast cancer	Overall survival	0	2088
BT_O15	GPL570	GSE20711	GSM519743	Breast cancer	Breast cancer	Overall survival	0	2716
BT_O15	GPL570	GSE20711	GSM519744	Breast cancer	Breast cancer	Overall survival	0	1635
BT_O15	GPL570	GSE20711	GSM519745	Breast cancer	Breast cancer	Overall survival	0	2690
BT_O15	GPL570	GSE20711	GSM519746	Breast cancer	Breast cancer	Overall survival	0	2851
BT_O15	GPL570	GSE20711	GSM519747	Breast cancer	Breast cancer	Overall survival	0	2862
BT_O15	GPL570	GSE20711	GSM519748	Breast cancer	Breast cancer	Overall survival	1	1376
BT_O15	GPL570	GSE20711	GSM519749	Breast cancer	Breast cancer	Overall survival	1	1927
BT_O15	GPL570	GSE20711	GSM519750	Breast cancer	Breast cancer	Overall survival	0	3062
BT_O15	GPL570	GSE20711	GSM519751	Breast cancer	Breast cancer	Overall survival	0	2785
BT_O15	GPL570	GSE20711	GSM519752	Breast cancer	Breast cancer	Overall survival	1	555
BT_O15	GPL570	GSE20711	GSM519753	Breast cancer	Breast cancer	Overall survival	0	2613
BT_O15	GPL570	GSE20711	GSM519754	Breast cancer	Breast cancer	Overall survival	0	2639
BT_O15	GPL570	GSE20711	GSM519755	Breast cancer	Breast cancer	Overall survival	0	2449
BT_O15	GPL570	GSE20711	GSM519756	Breast cancer	Breast cancer	Overall survival	0	2321
BT_O15	GPL570	GSE20711	GSM519757	Breast cancer	Breast cancer	Overall survival	0	2391
BT_O15	GPL570	GSE20711	GSM519758	Breast cancer	Breast cancer	Overall survival	1	1818
BT_O15	GPL570	GSE20711	GSM519759	Breast cancer	Breast cancer	Overall survival	0	2263
BT_O15	GPL570	GSE20711	GSM519760	Breast cancer	Breast cancer	Overall survival	0	2267
BT_O15	GPL570	GSE20711	GSM519761	Breast cancer	Breast cancer	Overall survival	1	2029
BT_O15	GPL570	GSE20711	GSM519762	Breast cancer	Breast cancer	Overall survival	0	2493
BT_O15	GPL570	GSE20711	GSM519763	Breast cancer	Breast cancer	Overall survival	0	2584
BT_O15	GPL570	GSE20711	GSM519764	Breast cancer	Breast cancer	Overall survival	1	2354
BT_O15	GPL570	GSE20711	GSM519765	Breast cancer	Breast cancer	Overall survival	0	2270
BT_O15	GPL570	GSE20711	GSM519767	Breast cancer	Breast cancer	Overall survival	1	719
BT_O15	GPL570	GSE20711	GSM519768	Breast cancer	Breast cancer	Overall survival	0	5139
BT_O15	GPL570	GSE20711	GSM519769	Breast cancer	Breast cancer	Overall survival	0	2252
BT_O15	GPL570	GSE20711	GSM519770	Breast cancer	Breast cancer	Overall survival	1	1084
BT_O15	GPL570	GSE20711	GSM519771	Breast cancer	Breast cancer	Overall survival	0	4672
BT_O15	GPL570	GSE20711	GSM519772	Breast cancer	Breast cancer	Overall survival	0	2172
BT_O15	GPL570	GSE20711	GSM519773	Breast cancer	Breast cancer	Overall survival	1	1672
BT_O15	GPL570	GSE20711	GSM519774	Breast cancer	Breast cancer	Overall survival	0	2095
BT_O15	GPL570	GSE20711	GSM519775	Breast cancer	Breast cancer	Overall survival	0	1650
BT_O15	GPL570	GSE20711	GSM519776	Breast cancer	Breast cancer	Overall survival	0	2234
BT_O15	GPL570	GSE20711	GSM519777	Breast cancer	Breast cancer	Overall survival	1	577
BT_O15	GPL570	GSE20711	GSM519778	Breast cancer	Breast cancer	Overall survival	0	1982
BT_O15	GPL570	GSE20711	GSM519779	Breast cancer	Breast cancer	Overall survival	1	1945
BT_O15	GPL570	GSE20711	GSM519780	Breast cancer	Breast cancer	Overall survival	0	2584
BT_O15	GPL570	GSE20711	GSM519781	Breast cancer	Breast cancer	Overall survival	0	5095
BT_O15	GPL570	GSE20711	GSM519782	Breast cancer	Breast cancer	Overall survival	0	4887
BT_O15	GPL570	GSE20711	GSM519783	Breast cancer	Breast cancer	Overall survival	0	2894
BT_O15	GPL570	GSE20711	GSM519784	Breast cancer	Breast cancer	Overall survival	1	2708
BT_O15	GPL570	GSE20711	GSM519785	Breast cancer	Breast cancer	Overall survival	1	2150
BT_O15	GPL570	GSE20711	GSM519786	Breast cancer	Breast cancer	Overall survival	1	4132
BT_O15	GPL570	GSE20711	GSM519787	Breast cancer	Breast cancer	Overall survival	1	701
BT_O15	GPL570	GSE20711	GSM519788	Breast cancer	Breast cancer	Overall survival	0	2329
BT_O15	GPL570	GSE20711	GSM519789	Breast cancer	Breast cancer	Overall survival	0	2175
BT_O15	GPL570	GSE20711	GSM519790	Breast cancer	Breast cancer	Overall survival	0	4909
BT_O15	GPL570	GSE20711	GSM519791	Breast cancer	Breast cancer	Overall survival	0	2884
BT_O15	GPL570	GSE20711	GSM519792	Breast cancer	Breast cancer	Overall survival	0	4898
BT_O15	GPL570	GSE20711	GSM519793	Breast cancer	Breast cancer	Overall survival	0	4844
BT_O15	GPL570	GSE20711	GSM519794	Breast cancer	Breast cancer	Overall survival	0	3190
BT_O15	GPL570	GSE20711	GSM519795	Breast cancer	Breast cancer	Overall survival	0	1956
BT_O15	GPL570	GSE20711	GSM519796	Breast cancer	Breast cancer	Overall survival	0	4530
BT_O15	GPL570	GSE20711	GSM519797	Breast cancer	Breast cancer	Overall survival	1	318
BT_O15	GPL570	GSE20711	GSM519798	Breast cancer	Breast cancer	Overall survival	1	2891
BT_O15	GPL570	GSE20711	GSM519799	Breast cancer	Breast cancer	Overall survival	0	3949
BT_O15	GPL570	GSE20711	GSM519800	Breast cancer	Breast cancer	Overall survival	0	442
BT_O15	GPL570	GSE20711	GSM519801	Breast cancer	Breast cancer	Overall survival	1	1785
BT_O15	GPL570	GSE20711	GSM519802	Breast cancer	Breast cancer	Overall survival	0	3570
BT_O15	GPL570	GSE20711	GSM519803	Breast cancer	Breast cancer	Overall survival	1	1712
BT_O15	GPL570	GSE20711	GSM519804	Breast cancer	Breast cancer	Overall survival	0	3646
BT_O15	GPL570	GSE20711	GSM519805	Breast cancer	Breast cancer	Overall survival	0	2037
BT_O15	GPL570	GSE20711	GSM519806	Breast cancer	Breast cancer	Overall survival	1	1296
BT_O15	GPL570	GSE20711	GSM519807	Breast cancer	Breast cancer	Overall survival	1	1891
BT_O15	GPL570	GSE20711	GSM519808	Breast cancer	Breast cancer	Overall survival	0	2259
BT_O15	GPL570	GSE20711	GSM519809	Breast cancer	Breast cancer	Overall survival	0	2230
BT_O15	GPL570	GSE20711	GSM519810	Breast cancer	Breast cancer	Overall survival	0	2227
BT_O16	GPL570	GSE20711	GSM519722	Breast cancer	Breast cancer	Relapse-free survival	1	339
BT_O16	GPL570	GSE20711	GSM519723	Breast cancer	Breast cancer	Relapse-free survival	1	445
BT_O16	GPL570	GSE20711	GSM519724	Breast cancer	Breast cancer	Relapse-free survival	0	3154
BT_O16	GPL570	GSE20711	GSM519725	Breast cancer	Breast cancer	Relapse-free survival	0	3066
BT_O16	GPL570	GSE20711	GSM519726	Breast cancer	Breast cancer	Relapse-free survival	0	2632
BT_O16	GPL570	GSE20711	GSM519727	Breast cancer	Breast cancer	Relapse-free survival	1	2559
BT_O16	GPL570	GSE20711	GSM519728	Breast cancer	Breast cancer	Relapse-free survival	0	774
BT_O16	GPL570	GSE20711	GSM519729	Breast cancer	Breast cancer	Relapse-free survival	0	3037
BT_O16	GPL570	GSE20711	GSM519730	Breast cancer	Breast cancer	Relapse-free survival	0	3219
BT_O16	GPL570	GSE20711	GSM519731	Breast cancer	Breast cancer	Relapse-free survival	0	3296
BT_O16	GPL570	GSE20711	GSM519732	Breast cancer	Breast cancer	Relapse-free survival	0	3278
BT_O16	GPL570	GSE20711	GSM519733	Breast cancer	Breast cancer	Relapse-free survival	0	2778
BT_O16	GPL570	GSE20711	GSM519734	Breast cancer	Breast cancer	Relapse-free survival	0	3449
BT_O16	GPL570	GSE20711	GSM519735	Breast cancer	Breast cancer	Relapse-free survival	1	1562
BT_O16	GPL570	GSE20711	GSM519736	Breast cancer	Breast cancer	Relapse-free survival	0	2216
BT_O16	GPL570	GSE20711	GSM519737	Breast cancer	Breast cancer	Relapse-free survival	1	934
BT_O16	GPL570	GSE20711	GSM519738	Breast cancer	Breast cancer	Relapse-free survival	0	3227
BT_O16	GPL570	GSE20711	GSM519739	Breast cancer	Breast cancer	Relapse-free survival	0	2931
BT_O16	GPL570	GSE20711	GSM519740	Breast cancer	Breast cancer	Relapse-free survival	0	675
BT_O16	GPL570	GSE20711	GSM519741	Breast cancer	Breast cancer	Relapse-free survival	1	186
BT_O16	GPL570	GSE20711	GSM519742	Breast cancer	Breast cancer	Relapse-free survival	0	2088
BT_O16	GPL570	GSE20711	GSM519743	Breast cancer	Breast cancer	Relapse-free survival	0	2716
BT_O16	GPL570	GSE20711	GSM519744	Breast cancer	Breast cancer	Relapse-free survival	0	1635
BT_O16	GPL570	GSE20711	GSM519745	Breast cancer	Breast cancer	Relapse-free survival	1	1219
BT_O16	GPL570	GSE20711	GSM519747	Breast cancer	Breast cancer	Relapse-free survival	0	2862
BT_O16	GPL570	GSE20711	GSM519748	Breast cancer	Breast cancer	Relapse-free survival	1	748
BT_O16	GPL570	GSE20711	GSM519749	Breast cancer	Breast cancer	Relapse-free survival	1	1234
BT_O16	GPL570	GSE20711	GSM519750	Breast cancer	Breast cancer	Relapse-free survival	0	3062
BT_O16	GPL570	GSE20711	GSM519752	Breast cancer	Breast cancer	Relapse-free survival	0	511
BT_O16	GPL570	GSE20711	GSM519753	Breast cancer	Breast cancer	Relapse-free survival	0	2613
BT_O16	GPL570	GSE20711	GSM519754	Breast cancer	Breast cancer	Relapse-free survival	1	1424
BT_O16	GPL570	GSE20711	GSM519755	Breast cancer	Breast cancer	Relapse-free survival	0	2449
BT_O16	GPL570	GSE20711	GSM519756	Breast cancer	Breast cancer	Relapse-free survival	0	2321
BT_O16	GPL570	GSE20711	GSM519757	Breast cancer	Breast cancer	Relapse-free survival	1	1829
BT_O16	GPL570	GSE20711	GSM519758	Breast cancer	Breast cancer	Relapse-free survival	1	1230
BT_O16	GPL570	GSE20711	GSM519759	Breast cancer	Breast cancer	Relapse-free survival	0	2263
BT_O16	GPL570	GSE20711	GSM519760	Breast cancer	Breast cancer	Relapse-free survival	0	2267
BT_O16	GPL570	GSE20711	GSM519761	Breast cancer	Breast cancer	Relapse-free survival	1	537
BT_O16	GPL570	GSE20711	GSM519762	Breast cancer	Breast cancer	Relapse-free survival	0	2493
BT_O16	GPL570	GSE20711	GSM519763	Breast cancer	Breast cancer	Relapse-free survival	1	1672
BT_O16	GPL570	GSE20711	GSM519764	Breast cancer	Breast cancer	Relapse-free survival	1	960
BT_O16	GPL570	GSE20711	GSM519765	Breast cancer	Breast cancer	Relapse-free survival	0	2270
BT_O16	GPL570	GSE20711	GSM519767	Breast cancer	Breast cancer	Relapse-free survival	0	204
BT_O16	GPL570	GSE20711	GSM519768	Breast cancer	Breast cancer	Relapse-free survival	0	5139
BT_O16	GPL570	GSE20711	GSM519769	Breast cancer	Breast cancer	Relapse-free survival	0	2252
BT_O16	GPL570	GSE20711	GSM519770	Breast cancer	Breast cancer	Relapse-free survival	1	29
BT_O16	GPL570	GSE20711	GSM519771	Breast cancer	Breast cancer	Relapse-free survival	1	2723
BT_O16	GPL570	GSE20711	GSM519772	Breast cancer	Breast cancer	Relapse-free survival	0	2172
BT_O16	GPL570	GSE20711	GSM519773	Breast cancer	Breast cancer	Relapse-free survival	1	617
BT_O16	GPL570	GSE20711	GSM519774	Breast cancer	Breast cancer	Relapse-free survival	0	2095
BT_O16	GPL570	GSE20711	GSM519775	Breast cancer	Breast cancer	Relapse-free survival	1	1617
BT_O16	GPL570	GSE20711	GSM519776	Breast cancer	Breast cancer	Relapse-free survival	0	2234
BT_O16	GPL570	GSE20711	GSM519777	Breast cancer	Breast cancer	Relapse-free survival	1	394
BT_O16	GPL570	GSE20711	GSM519778	Breast cancer	Breast cancer	Relapse-free survival	0	1982
BT_O16	GPL570	GSE20711	GSM519779	Breast cancer	Breast cancer	Relapse-free survival	1	748
BT_O16	GPL570	GSE20711	GSM519780	Breast cancer	Breast cancer	Relapse-free survival	1	883
BT_O16	GPL570	GSE20711	GSM519781	Breast cancer	Breast cancer	Relapse-free survival	0	5095
BT_O16	GPL570	GSE20711	GSM519782	Breast cancer	Breast cancer	Relapse-free survival	0	4887
BT_O16	GPL570	GSE20711	GSM519783	Breast cancer	Breast cancer	Relapse-free survival	1	2161
BT_O16	GPL570	GSE20711	GSM519784	Breast cancer	Breast cancer	Relapse-free survival	0	1394
BT_O16	GPL570	GSE20711	GSM519785	Breast cancer	Breast cancer	Relapse-free survival	1	763
BT_O16	GPL570	GSE20711	GSM519786	Breast cancer	Breast cancer	Relapse-free survival	1	3165
BT_O16	GPL570	GSE20711	GSM519787	Breast cancer	Breast cancer	Relapse-free survival	1	540
BT_O16	GPL570	GSE20711	GSM519788	Breast cancer	Breast cancer	Relapse-free survival	0	2329
BT_O16	GPL570	GSE20711	GSM519789	Breast cancer	Breast cancer	Relapse-free survival	0	2175
BT_O16	GPL570	GSE20711	GSM519790	Breast cancer	Breast cancer	Relapse-free survival	0	4909
BT_O16	GPL570	GSE20711	GSM519791	Breast cancer	Breast cancer	Relapse-free survival	0	2884
BT_O16	GPL570	GSE20711	GSM519792	Breast cancer	Breast cancer	Relapse-free survival	0	4898
BT_O16	GPL570	GSE20711	GSM519793	Breast cancer	Breast cancer	Relapse-free survival	0	4844
BT_O16	GPL570	GSE20711	GSM519794	Breast cancer	Breast cancer	Relapse-free survival	0	3190
BT_O16	GPL570	GSE20711	GSM519795	Breast cancer	Breast cancer	Relapse-free survival	0	1956
BT_O16	GPL570	GSE20711	GSM519796	Breast cancer	Breast cancer	Relapse-free survival	1	3354
BT_O16	GPL570	GSE20711	GSM519797	Breast cancer	Breast cancer	Relapse-free survival	1	270
BT_O16	GPL570	GSE20711	GSM519798	Breast cancer	Breast cancer	Relapse-free survival	1	2365
BT_O16	GPL570	GSE20711	GSM519799	Breast cancer	Breast cancer	Relapse-free survival	1	3730
BT_O16	GPL570	GSE20711	GSM519800	Breast cancer	Breast cancer	Relapse-free survival	1	1438
BT_O16	GPL570	GSE20711	GSM519801	Breast cancer	Breast cancer	Relapse-free survival	1	934
BT_O16	GPL570	GSE20711	GSM519802	Breast cancer	Breast cancer	Relapse-free survival	0	3570
BT_O16	GPL570	GSE20711	GSM519803	Breast cancer	Breast cancer	Relapse-free survival	1	1551
BT_O16	GPL570	GSE20711	GSM519804	Breast cancer	Breast cancer	Relapse-free survival	0	3646
BT_O16	GPL570	GSE20711	GSM519805	Breast cancer	Breast cancer	Relapse-free survival	1	967
BT_O16	GPL570	GSE20711	GSM519806	Breast cancer	Breast cancer	Relapse-free survival	1	234
BT_O16	GPL570	GSE20711	GSM519807	Breast cancer	Breast cancer	Relapse-free survival	1	1369
BT_O16	GPL570	GSE20711	GSM519808	Breast cancer	Breast cancer	Relapse-free survival	0	2259
BT_O16	GPL570	GSE20711	GSM519809	Breast cancer	Breast cancer	Relapse-free survival	0	2230
BT_O16	GPL570	GSE20711	GSM519810	Breast cancer	Breast cancer	Relapse-free survival	1	4
BT_O17	GPL6947	GSE24450	GSM602338	Breast cancer	Breast cancer	Overall survival	0	1514
BT_O17	GPL6947	GSE24450	GSM602339	Breast cancer	Breast cancer	Overall survival	0	2564
BT_O17	GPL6947	GSE24450	GSM602340	Breast cancer	Breast cancer	Overall survival	1	1006
BT_O17	GPL6947	GSE24450	GSM602341	Breast cancer	Breast cancer	Overall survival	1	673
BT_O17	GPL6947	GSE24450	GSM602342	Breast cancer	Breast cancer	Overall survival	0	3600
BT_O17	GPL6947	GSE24450	GSM602343	Breast cancer	Breast cancer	Overall survival	0	3600
BT_O17	GPL6947	GSE24450	GSM602344	Breast cancer	Breast cancer	Overall survival	1	1064
BT_O17	GPL6947	GSE24450	GSM602345	Breast cancer	Breast cancer	Overall survival	0	3600
BT_O17	GPL6947	GSE24450	GSM602346	Breast cancer	Breast cancer	Overall survival	0	3314
BT_O17	GPL6947	GSE24450	GSM602347	Breast cancer	Breast cancer	Overall survival	0	1696
BT_O17	GPL6947	GSE24450	GSM602348	Breast cancer	Breast cancer	Overall survival	0	2471
BT_O17	GPL6947	GSE24450	GSM602349	Breast cancer	Breast cancer	Overall survival	0	2264
BT_O17	GPL6947	GSE24450	GSM602350	Breast cancer	Breast cancer	Overall survival	0	2534
BT_O17	GPL6947	GSE24450	GSM602351	Breast cancer	Breast cancer	Overall survival	0	2503
BT_O17	GPL6947	GSE24450	GSM602352	Breast cancer	Breast cancer	Overall survival	0	2714
BT_O17	GPL6947	GSE24450	GSM602353	Breast cancer	Breast cancer	Overall survival	0	3600
BT_O17	GPL6947	GSE24450	GSM602354	Breast cancer	Breast cancer	Overall survival	1	914
BT_O17	GPL6947	GSE24450	GSM602355	Breast cancer	Breast cancer	Overall survival	1	1214
BT_O17	GPL6947	GSE24450	GSM602356	Breast cancer	Breast cancer	Overall survival	0	3600
BT_O17	GPL6947	GSE24450	GSM602357	Breast cancer	Breast cancer	Overall survival	0	3600
BT_O17	GPL6947	GSE24450	GSM602358	Breast cancer	Breast cancer	Overall survival	0	3600
BT_O17	GPL6947	GSE24450	GSM602359	Breast cancer	Breast cancer	Overall survival	1	1184
BT_O17	GPL6947	GSE24450	GSM602360	Breast cancer	Breast cancer	Overall survival	1	1516
BT_O17	GPL6947	GSE24450	GSM602361	Breast cancer	Breast cancer	Overall survival	0	3600
BT_O17	GPL6947	GSE24450	GSM602362	Breast cancer	Breast cancer	Overall survival	0	3600
BT_O17	GPL6947	GSE24450	GSM602363	Breast cancer	Breast cancer	Overall survival	1	2114
BT_O17	GPL6947	GSE24450	GSM602364	Breast cancer	Breast cancer	Overall survival	1	2744
BT_O17	GPL6947	GSE24450	GSM602365	Breast cancer	Breast cancer	Overall survival	0	3554
BT_O17	GPL6947	GSE24450	GSM602366	Breast cancer	Breast cancer	Overall survival	1	675
BT_O17	GPL6947	GSE24450	GSM602367	Breast cancer	Breast cancer	Overall survival	0	3496
BT_O17	GPL6947	GSE24450	GSM602368	Breast cancer	Breast cancer	Overall survival	1	1575
BT_O17	GPL6947	GSE24450	GSM602369	Breast cancer	Breast cancer	Overall survival	0	3585
BT_O17	GPL6947	GSE24450	GSM602370	Breast cancer	Breast cancer	Overall survival	1	1306
BT_O17	GPL6947	GSE24450	GSM602371	Breast cancer	Breast cancer	Overall survival	0	3600
BT_O17	GPL6947	GSE24450	GSM602372	Breast cancer	Breast cancer	Overall survival	1	2926
BT_O17	GPL6947	GSE24450	GSM602373	Breast cancer	Breast cancer	Overall survival	1	1216
BT_O17	GPL6947	GSE24450	GSM602374	Breast cancer	Breast cancer	Overall survival	0	3584
BT_O17	GPL6947	GSE24450	GSM602375	Breast cancer	Breast cancer	Overall survival	0	3600
BT_O17	GPL6947	GSE24450	GSM602376	Breast cancer	Breast cancer	Overall survival	1	2355
BT_O17	GPL6947	GSE24450	GSM602377	Breast cancer	Breast cancer	Overall survival	0	3553
BT_O17	GPL6947	GSE24450	GSM602378	Breast cancer	Breast cancer	Overall survival	0	3600
BT_O17	GPL6947	GSE24450	GSM602379	Breast cancer	Breast cancer	Overall survival	1	2981
BT_O17	GPL6947	GSE24450	GSM602380	Breast cancer	Breast cancer	Overall survival	1	1725
BT_O17	GPL6947	GSE24450	GSM602381	Breast cancer	Breast cancer	Overall survival	1	2564
BT_O17	GPL6947	GSE24450	GSM602382	Breast cancer	Breast cancer	Overall survival	0	3600
BT_O17	GPL6947	GSE24450	GSM602383	Breast cancer	Breast cancer	Overall survival	0	3584
BT_O17	GPL6947	GSE24450	GSM602384	Breast cancer	Breast cancer	Overall survival	1	1755
BT_O17	GPL6947	GSE24450	GSM602385	Breast cancer	Breast cancer	Overall survival	0	2295
BT_O17	GPL6947	GSE24450	GSM602386	Breast cancer	Breast cancer	Overall survival	0	3600
BT_O17	GPL6947	GSE24450	GSM602387	Breast cancer	Breast cancer	Overall survival	0	3600
BT_O17	GPL6947	GSE24450	GSM602388	Breast cancer	Breast cancer	Overall survival	0	2956
BT_O17	GPL6947	GSE24450	GSM602389	Breast cancer	Breast cancer	Overall survival	0	2866
BT_O17	GPL6947	GSE24450	GSM602390	Breast cancer	Breast cancer	Overall survival	0	2864
BT_O17	GPL6947	GSE24450	GSM602391	Breast cancer	Breast cancer	Overall survival	0	2834
BT_O17	GPL6947	GSE24450	GSM602392	Breast cancer	Breast cancer	Overall survival	1	1666
BT_O17	GPL6947	GSE24450	GSM602393	Breast cancer	Breast cancer	Overall survival	1	1096
BT_O17	GPL6947	GSE24450	GSM602394	Breast cancer	Breast cancer	Overall survival	0	3600
BT_O17	GPL6947	GSE24450	GSM602395	Breast cancer	Breast cancer	Overall survival	0	2835
BT_O17	GPL6947	GSE24450	GSM602396	Breast cancer	Breast cancer	Overall survival	1	704
BT_O17	GPL6947	GSE24450	GSM602397	Breast cancer	Breast cancer	Overall survival	1	614
BT_O17	GPL6947	GSE24450	GSM602398	Breast cancer	Breast cancer	Overall survival	0	3194
BT_O17	GPL6947	GSE24450	GSM602399	Breast cancer	Breast cancer	Overall survival	0	2924
BT_O17	GPL6947	GSE24450	GSM602400	Breast cancer	Breast cancer	Overall survival	0	2925
BT_O17	GPL6947	GSE24450	GSM602401	Breast cancer	Breast cancer	Overall survival	1	434
BT_O17	GPL6947	GSE24450	GSM602402	Breast cancer	Breast cancer	Overall survival	1	2686
BT_O17	GPL6947	GSE24450	GSM602403	Breast cancer	Breast cancer	Overall survival	0	2894
BT_O17	GPL6947	GSE24450	GSM602404	Breast cancer	Breast cancer	Overall survival	0	2746
BT_O17	GPL6947	GSE24450	GSM602405	Breast cancer	Breast cancer	Overall survival	0	2774
BT_O17	GPL6947	GSE24450	GSM602406	Breast cancer	Breast cancer	Overall survival	0	2806
BT_O17	GPL6947	GSE24450	GSM602407	Breast cancer	Breast cancer	Overall survival	0	3600
BT_O17	GPL6947	GSE24450	GSM602408	Breast cancer	Breast cancer	Overall survival	0	3600
BT_O17	GPL6947	GSE24450	GSM602409	Breast cancer	Breast cancer	Overall survival	0	3600
BT_O17	GPL6947	GSE24450	GSM602410	Breast cancer	Breast cancer	Overall survival	0	3136
BT_O17	GPL6947	GSE24450	GSM602411	Breast cancer	Breast cancer	Overall survival	0	3194
BT_O17	GPL6947	GSE24450	GSM602412	Breast cancer	Breast cancer	Overall survival	1	766
BT_O17	GPL6947	GSE24450	GSM602413	Breast cancer	Breast cancer	Overall survival	0	2263
BT_O17	GPL6947	GSE24450	GSM602414	Breast cancer	Breast cancer	Overall survival	0	2504
BT_O17	GPL6947	GSE24450	GSM602415	Breast cancer	Breast cancer	Overall survival	0	2234
BT_O17	GPL6947	GSE24450	GSM602416	Breast cancer	Breast cancer	Overall survival	0	2235
BT_O17	GPL6947	GSE24450	GSM602417	Breast cancer	Breast cancer	Overall survival	0	2234
BT_O17	GPL6947	GSE24450	GSM602418	Breast cancer	Breast cancer	Overall survival	0	2236
BT_O17	GPL6947	GSE24450	GSM602419	Breast cancer	Breast cancer	Overall survival	0	2234
BT_O17	GPL6947	GSE24450	GSM602420	Breast cancer	Breast cancer	Overall survival	1	1544
BT_O17	GPL6947	GSE24450	GSM602421	Breast cancer	Breast cancer	Overall survival	0	2206
BT_O17	GPL6947	GSE24450	GSM602422	Breast cancer	Breast cancer	Overall survival	0	2204
BT_O17	GPL6947	GSE24450	GSM602423	Breast cancer	Breast cancer	Overall survival	0	2234
BT_O17	GPL6947	GSE24450	GSM602424	Breast cancer	Breast cancer	Overall survival	0	2236
BT_O17	GPL6947	GSE24450	GSM602425	Breast cancer	Breast cancer	Overall survival	0	2204
BT_O17	GPL6947	GSE24450	GSM602426	Breast cancer	Breast cancer	Overall survival	0	2174
BT_O17	GPL6947	GSE24450	GSM602427	Breast cancer	Breast cancer	Overall survival	0	2204
BT_O17	GPL6947	GSE24450	GSM602428	Breast cancer	Breast cancer	Overall survival	0	2176
BT_O17	GPL6947	GSE24450	GSM602429	Breast cancer	Breast cancer	Overall survival	0	2175
BT_O17	GPL6947	GSE24450	GSM602430	Breast cancer	Breast cancer	Overall survival	0	2206
BT_O17	GPL6947	GSE24450	GSM602431	Breast cancer	Breast cancer	Overall survival	0	2175
BT_O17	GPL6947	GSE24450	GSM602432	Breast cancer	Breast cancer	Overall survival	1	991
BT_O17	GPL6947	GSE24450	GSM602433	Breast cancer	Breast cancer	Overall survival	0	2145
BT_O17	GPL6947	GSE24450	GSM602434	Breast cancer	Breast cancer	Overall survival	0	2143
BT_O17	GPL6947	GSE24450	GSM602435	Breast cancer	Breast cancer	Overall survival	0	2144
BT_O17	GPL6947	GSE24450	GSM602436	Breast cancer	Breast cancer	Overall survival	0	2145
BT_O17	GPL6947	GSE24450	GSM602437	Breast cancer	Breast cancer	Overall survival	0	2145
BT_O17	GPL6947	GSE24450	GSM602438	Breast cancer	Breast cancer	Overall survival	0	2557
BT_O17	GPL6947	GSE24450	GSM602439	Breast cancer	Breast cancer	Overall survival	0	3570
BT_O17	GPL6947	GSE24450	GSM602440	Breast cancer	Breast cancer	Overall survival	0	3017
BT_O17	GPL6947	GSE24450	GSM602441	Breast cancer	Breast cancer	Overall survival	0	2144
BT_O17	GPL6947	GSE24450	GSM602442	Breast cancer	Breast cancer	Overall survival	0	2144
BT_O17	GPL6947	GSE24450	GSM602443	Breast cancer	Breast cancer	Overall survival	1	644
BT_O17	GPL6947	GSE24450	GSM602444	Breast cancer	Breast cancer	Overall survival	0	2114
BT_O17	GPL6947	GSE24450	GSM602445	Breast cancer	Breast cancer	Overall survival	0	2235
BT_O17	GPL6947	GSE24450	GSM602446	Breast cancer	Breast cancer	Overall survival	0	2144
BT_O17	GPL6947	GSE24450	GSM602447	Breast cancer	Breast cancer	Overall survival	0	2145
BT_O17	GPL6947	GSE24450	GSM602448	Breast cancer	Breast cancer	Overall survival	0	2143
BT_O17	GPL6947	GSE24450	GSM602449	Breast cancer	Breast cancer	Overall survival	0	2144
BT_O17	GPL6947	GSE24450	GSM602450	Breast cancer	Breast cancer	Overall survival	0	2208
BT_O17	GPL6947	GSE24450	GSM602451	Breast cancer	Breast cancer	Overall survival	0	2113
BT_O17	GPL6947	GSE24450	GSM602452	Breast cancer	Breast cancer	Overall survival	1	764
BT_O17	GPL6947	GSE24450	GSM602453	Breast cancer	Breast cancer	Overall survival	1	1785
BT_O17	GPL6947	GSE24450	GSM602454	Breast cancer	Breast cancer	Overall survival	0	3600
BT_O17	GPL6947	GSE24450	GSM602455	Breast cancer	Breast cancer	Overall survival	0	2145
BT_O17	GPL6947	GSE24450	GSM602456	Breast cancer	Breast cancer	Overall survival	0	2447
BT_O17	GPL6947	GSE24450	GSM602457	Breast cancer	Breast cancer	Overall survival	1	1064
BT_O17	GPL6947	GSE24450	GSM602458	Breast cancer	Breast cancer	Overall survival	0	1875
BT_O17	GPL6947	GSE24450	GSM602459	Breast cancer	Breast cancer	Overall survival	0	1845
BT_O17	GPL6947	GSE24450	GSM602460	Breast cancer	Breast cancer	Overall survival	0	1995
BT_O17	GPL6947	GSE24450	GSM602461	Breast cancer	Breast cancer	Overall survival	0	1785
BT_O17	GPL6947	GSE24450	GSM602462	Breast cancer	Breast cancer	Overall survival	0	1850
BT_O17	GPL6947	GSE24450	GSM602463	Breast cancer	Breast cancer	Overall survival	0	1999
BT_O17	GPL6947	GSE24450	GSM602464	Breast cancer	Breast cancer	Overall survival	0	1911
BT_O17	GPL6947	GSE24450	GSM602465	Breast cancer	Breast cancer	Overall survival	0	1697
BT_O17	GPL6947	GSE24450	GSM602466	Breast cancer	Breast cancer	Overall survival	0	2042
BT_O17	GPL6947	GSE24450	GSM602467	Breast cancer	Breast cancer	Overall survival	0	1665
BT_O17	GPL6947	GSE24450	GSM602468	Breast cancer	Breast cancer	Overall survival	0	1772
BT_O17	GPL6947	GSE24450	GSM602469	Breast cancer	Breast cancer	Overall survival	0	1666
BT_O17	GPL6947	GSE24450	GSM602470	Breast cancer	Breast cancer	Overall survival	0	1665
BT_O17	GPL6947	GSE24450	GSM602471	Breast cancer	Breast cancer	Overall survival	0	1667
BT_O17	GPL6947	GSE24450	GSM602472	Breast cancer	Breast cancer	Overall survival	0	1635
BT_O17	GPL6947	GSE24450	GSM602473	Breast cancer	Breast cancer	Overall survival	0	1666
BT_O17	GPL6947	GSE24450	GSM602474	Breast cancer	Breast cancer	Overall survival	0	2612
BT_O17	GPL6947	GSE24450	GSM602475	Breast cancer	Breast cancer	Overall survival	0	1605
BT_O17	GPL6947	GSE24450	GSM602476	Breast cancer	Breast cancer	Overall survival	0	1636
BT_O17	GPL6947	GSE24450	GSM602477	Breast cancer	Breast cancer	Overall survival	1	1667
BT_O17	GPL6947	GSE24450	GSM602478	Breast cancer	Breast cancer	Overall survival	0	1916
BT_O17	GPL6947	GSE24450	GSM602479	Breast cancer	Breast cancer	Overall survival	0	1635
BT_O17	GPL6947	GSE24450	GSM602480	Breast cancer	Breast cancer	Overall survival	0	1636
BT_O17	GPL6947	GSE24450	GSM602481	Breast cancer	Breast cancer	Overall survival	0	1658
BT_O17	GPL6947	GSE24450	GSM602482	Breast cancer	Breast cancer	Overall survival	0	1606
BT_O17	GPL6947	GSE24450	GSM602483	Breast cancer	Breast cancer	Overall survival	0	1605
BT_O17	GPL6947	GSE24450	GSM602484	Breast cancer	Breast cancer	Overall survival	0	1575
BT_O17	GPL6947	GSE24450	GSM602485	Breast cancer	Breast cancer	Overall survival	0	1606
BT_O17	GPL6947	GSE24450	GSM602486	Breast cancer	Breast cancer	Overall survival	0	1574
BT_O17	GPL6947	GSE24450	GSM602487	Breast cancer	Breast cancer	Overall survival	0	1737
BT_O17	GPL6947	GSE24450	GSM602488	Breast cancer	Breast cancer	Overall survival	0	1576
BT_O17	GPL6947	GSE24450	GSM602489	Breast cancer	Breast cancer	Overall survival	1	1037
BT_O17	GPL6947	GSE24450	GSM602490	Breast cancer	Breast cancer	Overall survival	0	1575
BT_O17	GPL6947	GSE24450	GSM602491	Breast cancer	Breast cancer	Overall survival	0	1576
BT_O17	GPL6947	GSE24450	GSM602492	Breast cancer	Breast cancer	Overall survival	0	1558
BT_O17	GPL6947	GSE24450	GSM602493	Breast cancer	Breast cancer	Overall survival	0	1560
BT_O17	GPL6947	GSE24450	GSM602494	Breast cancer	Breast cancer	Overall survival	0	1575
BT_O17	GPL6947	GSE24450	GSM602495	Breast cancer	Breast cancer	Overall survival	0	1575
BT_O17	GPL6947	GSE24450	GSM602496	Breast cancer	Breast cancer	Overall survival	0	1545
BT_O17	GPL6947	GSE24450	GSM602497	Breast cancer	Breast cancer	Overall survival	0	1546
BT_O17	GPL6947	GSE24450	GSM602498	Breast cancer	Breast cancer	Overall survival	0	1605
BT_O17	GPL6947	GSE24450	GSM602499	Breast cancer	Breast cancer	Overall survival	1	1244
BT_O17	GPL6947	GSE24450	GSM602500	Breast cancer	Breast cancer	Overall survival	0	1576
BT_O17	GPL6947	GSE24450	GSM602501	Breast cancer	Breast cancer	Overall survival	0	1514
BT_O17	GPL6947	GSE24450	GSM602502	Breast cancer	Breast cancer	Overall survival	0	1545
BT_O17	GPL6947	GSE24450	GSM602503	Breast cancer	Breast cancer	Overall survival	0	1545
BT_O17	GPL6947	GSE24450	GSM602504	Breast cancer	Breast cancer	Overall survival	0	1545
BT_O17	GPL6947	GSE24450	GSM602505	Breast cancer	Breast cancer	Overall survival	0	1938
BT_O17	GPL6947	GSE24450	GSM602506	Breast cancer	Breast cancer	Overall survival	0	1545
BT_O17	GPL6947	GSE24450	GSM602507	Breast cancer	Breast cancer	Overall survival	0	1514
BT_O17	GPL6947	GSE24450	GSM602508	Breast cancer	Breast cancer	Overall survival	0	1515
BT_O17	GPL6947	GSE24450	GSM602509	Breast cancer	Breast cancer	Overall survival	0	1546
BT_O17	GPL6947	GSE24450	GSM602510	Breast cancer	Breast cancer	Overall survival	0	1514
BT_O17	GPL6947	GSE24450	GSM602511	Breast cancer	Breast cancer	Overall survival	0	1516
BT_O17	GPL6947	GSE24450	GSM602512	Breast cancer	Breast cancer	Overall survival	0	1514
BT_O17	GPL6947	GSE24450	GSM602513	Breast cancer	Breast cancer	Overall survival	0	1515
BT_O17	GPL6947	GSE24450	GSM602514	Breast cancer	Breast cancer	Overall survival	0	1545
BT_O17	GPL6947	GSE24450	GSM602515	Breast cancer	Breast cancer	Overall survival	1	1275
BT_O17	GPL6947	GSE24450	GSM602516	Breast cancer	Breast cancer	Overall survival	0	1455
BT_O17	GPL6947	GSE24450	GSM602517	Breast cancer	Breast cancer	Overall survival	0	1456
BT_O17	GPL6947	GSE24450	GSM602518	Breast cancer	Breast cancer	Overall survival	1	915
BT_O17	GPL6947	GSE24450	GSM602519	Breast cancer	Breast cancer	Overall survival	0	1457
BT_O17	GPL6947	GSE24450	GSM602520	Breast cancer	Breast cancer	Overall survival	0	1424
BT_O18	GPL570	GSE20685	GSM519117	Breast cancer	Breast cancer	Overall survival	0	2555
BT_O18	GPL570	GSE20685	GSM519118	Breast cancer	Breast cancer	Overall survival	0	2701
BT_O18	GPL570	GSE20685	GSM519119	Breast cancer	Breast cancer	Overall survival	0	2628
BT_O18	GPL570	GSE20685	GSM519120	Breast cancer	Breast cancer	Overall survival	0	2300
BT_O18	GPL570	GSE20685	GSM519121	Breast cancer	Breast cancer	Overall survival	0	2555
BT_O18	GPL570	GSE20685	GSM519122	Breast cancer	Breast cancer	Overall survival	0	2665
BT_O18	GPL570	GSE20685	GSM519123	Breast cancer	Breast cancer	Overall survival	0	2482
BT_O18	GPL570	GSE20685	GSM519124	Breast cancer	Breast cancer	Overall survival	0	2592
BT_O18	GPL570	GSE20685	GSM519125	Breast cancer	Breast cancer	Overall survival	0	2373
BT_O18	GPL570	GSE20685	GSM519126	Breast cancer	Breast cancer	Overall survival	1	1971
BT_O18	GPL570	GSE20685	GSM519127	Breast cancer	Breast cancer	Overall survival	0	2592
BT_O18	GPL570	GSE20685	GSM519128	Breast cancer	Breast cancer	Overall survival	0	2519
BT_O18	GPL570	GSE20685	GSM519129	Breast cancer	Breast cancer	Overall survival	0	2555
BT_O18	GPL570	GSE20685	GSM519130	Breast cancer	Breast cancer	Overall survival	0	2336
BT_O18	GPL570	GSE20685	GSM519131	Breast cancer	Breast cancer	Overall survival	0	2555
BT_O18	GPL570	GSE20685	GSM519132	Breast cancer	Breast cancer	Overall survival	0	2920
BT_O18	GPL570	GSE20685	GSM519133	Breast cancer	Breast cancer	Overall survival	1	657
BT_O18	GPL570	GSE20685	GSM519134	Breast cancer	Breast cancer	Overall survival	0	2227
BT_O18	GPL570	GSE20685	GSM519135	Breast cancer	Breast cancer	Overall survival	1	1278
BT_O18	GPL570	GSE20685	GSM519136	Breast cancer	Breast cancer	Overall survival	0	2555
BT_O18	GPL570	GSE20685	GSM519137	Breast cancer	Breast cancer	Overall survival	0	2628
BT_O18	GPL570	GSE20685	GSM519138	Breast cancer	Breast cancer	Overall survival	1	1898
BT_O18	GPL570	GSE20685	GSM519139	Breast cancer	Breast cancer	Overall survival	0	2592
BT_O18	GPL570	GSE20685	GSM519140	Breast cancer	Breast cancer	Overall survival	0	2482
BT_O18	GPL570	GSE20685	GSM519141	Breast cancer	Breast cancer	Overall survival	1	694
BT_O18	GPL570	GSE20685	GSM519142	Breast cancer	Breast cancer	Overall survival	0	2519
BT_O18	GPL570	GSE20685	GSM519143	Breast cancer	Breast cancer	Overall survival	0	1971
BT_O18	GPL570	GSE20685	GSM519144	Breast cancer	Breast cancer	Overall survival	1	438
BT_O18	GPL570	GSE20685	GSM519145	Breast cancer	Breast cancer	Overall survival	1	2117
BT_O18	GPL570	GSE20685	GSM519146	Breast cancer	Breast cancer	Overall survival	0	2519
BT_O18	GPL570	GSE20685	GSM519147	Breast cancer	Breast cancer	Overall survival	0	2373
BT_O18	GPL570	GSE20685	GSM519148	Breast cancer	Breast cancer	Overall survival	0	2519
BT_O18	GPL570	GSE20685	GSM519149	Breast cancer	Breast cancer	Overall survival	1	1460
BT_O18	GPL570	GSE20685	GSM519150	Breast cancer	Breast cancer	Overall survival	0	2446
BT_O18	GPL570	GSE20685	GSM519151	Breast cancer	Breast cancer	Overall survival	0	2190
BT_O18	GPL570	GSE20685	GSM519152	Breast cancer	Breast cancer	Overall survival	0	2190
BT_O18	GPL570	GSE20685	GSM519153	Breast cancer	Breast cancer	Overall survival	1	1351
BT_O18	GPL570	GSE20685	GSM519154	Breast cancer	Breast cancer	Overall survival	1	292
BT_O18	GPL570	GSE20685	GSM519155	Breast cancer	Breast cancer	Overall survival	0	2446
BT_O18	GPL570	GSE20685	GSM519156	Breast cancer	Breast cancer	Overall survival	0	2117
BT_O18	GPL570	GSE20685	GSM519157	Breast cancer	Breast cancer	Overall survival	0	2190
BT_O18	GPL570	GSE20685	GSM519158	Breast cancer	Breast cancer	Overall survival	0	2300
BT_O18	GPL570	GSE20685	GSM519159	Breast cancer	Breast cancer	Overall survival	0	2336
BT_O18	GPL570	GSE20685	GSM519160	Breast cancer	Breast cancer	Overall survival	0	1862
BT_O18	GPL570	GSE20685	GSM519161	Breast cancer	Breast cancer	Overall survival	0	2336
BT_O18	GPL570	GSE20685	GSM519162	Breast cancer	Breast cancer	Overall survival	0	2154
BT_O18	GPL570	GSE20685	GSM519163	Breast cancer	Breast cancer	Overall survival	0	1971
BT_O18	GPL570	GSE20685	GSM519164	Breast cancer	Breast cancer	Overall survival	0	2154
BT_O18	GPL570	GSE20685	GSM519165	Breast cancer	Breast cancer	Overall survival	0	2336
BT_O18	GPL570	GSE20685	GSM519166	Breast cancer	Breast cancer	Overall survival	1	840
BT_O18	GPL570	GSE20685	GSM519167	Breast cancer	Breast cancer	Overall survival	0	2555
BT_O18	GPL570	GSE20685	GSM519168	Breast cancer	Breast cancer	Overall survival	0	2373
BT_O18	GPL570	GSE20685	GSM519169	Breast cancer	Breast cancer	Overall survival	0	2190
BT_O18	GPL570	GSE20685	GSM519170	Breast cancer	Breast cancer	Overall survival	0	2373
BT_O18	GPL570	GSE20685	GSM519171	Breast cancer	Breast cancer	Overall survival	0	2519
BT_O18	GPL570	GSE20685	GSM519172	Breast cancer	Breast cancer	Overall survival	1	657
BT_O18	GPL570	GSE20685	GSM519173	Breast cancer	Breast cancer	Overall survival	0	2482
BT_O18	GPL570	GSE20685	GSM519174	Breast cancer	Breast cancer	Overall survival	0	2482
BT_O18	GPL570	GSE20685	GSM519175	Breast cancer	Breast cancer	Overall survival	0	1935
BT_O18	GPL570	GSE20685	GSM519176	Breast cancer	Breast cancer	Overall survival	0	2081
BT_O18	GPL570	GSE20685	GSM519177	Breast cancer	Breast cancer	Overall survival	0	2409
BT_O18	GPL570	GSE20685	GSM519178	Breast cancer	Breast cancer	Overall survival	0	1898
BT_O18	GPL570	GSE20685	GSM519179	Breast cancer	Breast cancer	Overall survival	0	1789
BT_O18	GPL570	GSE20685	GSM519180	Breast cancer	Breast cancer	Overall survival	0	1862
BT_O18	GPL570	GSE20685	GSM519181	Breast cancer	Breast cancer	Overall survival	0	2227
BT_O18	GPL570	GSE20685	GSM519182	Breast cancer	Breast cancer	Overall survival	0	3358
BT_O18	GPL570	GSE20685	GSM519183	Breast cancer	Breast cancer	Overall survival	0	2373
BT_O18	GPL570	GSE20685	GSM519184	Breast cancer	Breast cancer	Overall survival	0	1825
BT_O18	GPL570	GSE20685	GSM519185	Breast cancer	Breast cancer	Overall survival	0	2227
BT_O18	GPL570	GSE20685	GSM519186	Breast cancer	Breast cancer	Overall survival	0	2409
BT_O18	GPL570	GSE20685	GSM519187	Breast cancer	Breast cancer	Overall survival	0	2373
BT_O18	GPL570	GSE20685	GSM519188	Breast cancer	Breast cancer	Overall survival	0	2482
BT_O18	GPL570	GSE20685	GSM519189	Breast cancer	Breast cancer	Overall survival	0	2336
BT_O18	GPL570	GSE20685	GSM519190	Breast cancer	Breast cancer	Overall survival	1	329
BT_O18	GPL570	GSE20685	GSM519191	Breast cancer	Breast cancer	Overall survival	0	2336
BT_O18	GPL570	GSE20685	GSM519192	Breast cancer	Breast cancer	Overall survival	0	2373
BT_O18	GPL570	GSE20685	GSM519193	Breast cancer	Breast cancer	Overall survival	1	1460
BT_O18	GPL570	GSE20685	GSM519194	Breast cancer	Breast cancer	Overall survival	0	3869
BT_O18	GPL570	GSE20685	GSM519195	Breast cancer	Breast cancer	Overall survival	1	5147
BT_O18	GPL570	GSE20685	GSM519196	Breast cancer	Breast cancer	Overall survival	1	840
BT_O18	GPL570	GSE20685	GSM519197	Breast cancer	Breast cancer	Overall survival	0	5037
BT_O18	GPL570	GSE20685	GSM519198	Breast cancer	Breast cancer	Overall survival	0	5037
BT_O18	GPL570	GSE20685	GSM519199	Breast cancer	Breast cancer	Overall survival	0	5147
BT_O18	GPL570	GSE20685	GSM519200	Breast cancer	Breast cancer	Overall survival	1	1570
BT_O18	GPL570	GSE20685	GSM519201	Breast cancer	Breast cancer	Overall survival	0	4818
BT_O18	GPL570	GSE20685	GSM519202	Breast cancer	Breast cancer	Overall survival	1	1716
BT_O18	GPL570	GSE20685	GSM519203	Breast cancer	Breast cancer	Overall survival	1	3285
BT_O18	GPL570	GSE20685	GSM519204	Breast cancer	Breast cancer	Overall survival	1	1059
BT_O18	GPL570	GSE20685	GSM519205	Breast cancer	Breast cancer	Overall survival	0	4234
BT_O18	GPL570	GSE20685	GSM519206	Breast cancer	Breast cancer	Overall survival	0	4198
BT_O18	GPL570	GSE20685	GSM519207	Breast cancer	Breast cancer	Overall survival	0	4745
BT_O18	GPL570	GSE20685	GSM519208	Breast cancer	Breast cancer	Overall survival	0	4782
BT_O18	GPL570	GSE20685	GSM519209	Breast cancer	Breast cancer	Overall survival	0	4526
BT_O18	GPL570	GSE20685	GSM519210	Breast cancer	Breast cancer	Overall survival	1	292
BT_O18	GPL570	GSE20685	GSM519211	Breast cancer	Breast cancer	Overall survival	0	4234
BT_O18	GPL570	GSE20685	GSM519212	Breast cancer	Breast cancer	Overall survival	1	2300
BT_O18	GPL570	GSE20685	GSM519213	Breast cancer	Breast cancer	Overall survival	1	1789
BT_O18	GPL570	GSE20685	GSM519214	Breast cancer	Breast cancer	Overall survival	1	3030
BT_O18	GPL570	GSE20685	GSM519215	Breast cancer	Breast cancer	Overall survival	0	4855
BT_O18	GPL570	GSE20685	GSM519216	Breast cancer	Breast cancer	Overall survival	0	4453
BT_O18	GPL570	GSE20685	GSM519217	Breast cancer	Breast cancer	Overall survival	1	475
BT_O18	GPL570	GSE20685	GSM519218	Breast cancer	Breast cancer	Overall survival	0	4453
BT_O18	GPL570	GSE20685	GSM519219	Breast cancer	Breast cancer	Overall survival	0	2957
BT_O18	GPL570	GSE20685	GSM519220	Breast cancer	Breast cancer	Overall survival	0	4015
BT_O18	GPL570	GSE20685	GSM519221	Breast cancer	Breast cancer	Overall survival	0	4453
BT_O18	GPL570	GSE20685	GSM519222	Breast cancer	Breast cancer	Overall survival	1	1825
BT_O18	GPL570	GSE20685	GSM519223	Breast cancer	Breast cancer	Overall survival	1	511
BT_O18	GPL570	GSE20685	GSM519224	Breast cancer	Breast cancer	Overall survival	1	2373
BT_O18	GPL570	GSE20685	GSM519225	Breast cancer	Breast cancer	Overall survival	1	2081
BT_O18	GPL570	GSE20685	GSM519226	Breast cancer	Breast cancer	Overall survival	0	3577
BT_O18	GPL570	GSE20685	GSM519227	Breast cancer	Breast cancer	Overall survival	0	4234
BT_O18	GPL570	GSE20685	GSM519228	Breast cancer	Breast cancer	Overall survival	0	4417
BT_O18	GPL570	GSE20685	GSM519229	Breast cancer	Breast cancer	Overall survival	1	3358
BT_O18	GPL570	GSE20685	GSM519230	Breast cancer	Breast cancer	Overall survival	0	4709
BT_O18	GPL570	GSE20685	GSM519231	Breast cancer	Breast cancer	Overall survival	0	4636
BT_O18	GPL570	GSE20685	GSM519232	Breast cancer	Breast cancer	Overall survival	0	4417
BT_O18	GPL570	GSE20685	GSM519233	Breast cancer	Breast cancer	Overall survival	0	4672
BT_O18	GPL570	GSE20685	GSM519234	Breast cancer	Breast cancer	Overall survival	0	3979
BT_O18	GPL570	GSE20685	GSM519235	Breast cancer	Breast cancer	Overall survival	1	913
BT_O18	GPL570	GSE20685	GSM519236	Breast cancer	Breast cancer	Overall survival	1	730
BT_O18	GPL570	GSE20685	GSM519237	Breast cancer	Breast cancer	Overall survival	1	438
BT_O18	GPL570	GSE20685	GSM519238	Breast cancer	Breast cancer	Overall survival	1	4161
BT_O18	GPL570	GSE20685	GSM519239	Breast cancer	Breast cancer	Overall survival	1	1679
BT_O18	GPL570	GSE20685	GSM519240	Breast cancer	Breast cancer	Overall survival	0	4490
BT_O18	GPL570	GSE20685	GSM519241	Breast cancer	Breast cancer	Overall survival	0	4015
BT_O18	GPL570	GSE20685	GSM519242	Breast cancer	Breast cancer	Overall survival	0	4052
BT_O18	GPL570	GSE20685	GSM519243	Breast cancer	Breast cancer	Overall survival	0	3942
BT_O18	GPL570	GSE20685	GSM519244	Breast cancer	Breast cancer	Overall survival	0	4015
BT_O18	GPL570	GSE20685	GSM519245	Breast cancer	Breast cancer	Overall survival	1	2555
BT_O18	GPL570	GSE20685	GSM519246	Breast cancer	Breast cancer	Overall survival	1	3249
BT_O18	GPL570	GSE20685	GSM519247	Breast cancer	Breast cancer	Overall survival	0	4599
BT_O18	GPL570	GSE20685	GSM519248	Breast cancer	Breast cancer	Overall survival	1	2154
BT_O18	GPL570	GSE20685	GSM519249	Breast cancer	Breast cancer	Overall survival	0	4088
BT_O18	GPL570	GSE20685	GSM519250	Breast cancer	Breast cancer	Overall survival	0	4015
BT_O18	GPL570	GSE20685	GSM519251	Breast cancer	Breast cancer	Overall survival	0	4125
BT_O18	GPL570	GSE20685	GSM519252	Breast cancer	Breast cancer	Overall survival	0	4234
BT_O18	GPL570	GSE20685	GSM519253	Breast cancer	Breast cancer	Overall survival	1	876
BT_O18	GPL570	GSE20685	GSM519254	Breast cancer	Breast cancer	Overall survival	0	4344
BT_O18	GPL570	GSE20685	GSM519255	Breast cancer	Breast cancer	Overall survival	0	4636
BT_O18	GPL570	GSE20685	GSM519256	Breast cancer	Breast cancer	Overall survival	0	4672
BT_O18	GPL570	GSE20685	GSM519257	Breast cancer	Breast cancer	Overall survival	1	1679
BT_O18	GPL570	GSE20685	GSM519258	Breast cancer	Breast cancer	Overall survival	0	3979
BT_O18	GPL570	GSE20685	GSM519259	Breast cancer	Breast cancer	Overall survival	1	4161
BT_O18	GPL570	GSE20685	GSM519260	Breast cancer	Breast cancer	Overall survival	0	4563
BT_O18	GPL570	GSE20685	GSM519261	Breast cancer	Breast cancer	Overall survival	0	4563
BT_O18	GPL570	GSE20685	GSM519262	Breast cancer	Breast cancer	Overall survival	0	3614
BT_O18	GPL570	GSE20685	GSM519263	Breast cancer	Breast cancer	Overall survival	1	1059
BT_O18	GPL570	GSE20685	GSM519264	Breast cancer	Breast cancer	Overall survival	0	4052
BT_O18	GPL570	GSE20685	GSM519265	Breast cancer	Breast cancer	Overall survival	1	2081
BT_O18	GPL570	GSE20685	GSM519266	Breast cancer	Breast cancer	Overall survival	1	365
BT_O18	GPL570	GSE20685	GSM519267	Breast cancer	Breast cancer	Overall survival	0	4782
BT_O18	GPL570	GSE20685	GSM519268	Breast cancer	Breast cancer	Overall survival	0	4052
BT_O18	GPL570	GSE20685	GSM519269	Breast cancer	Breast cancer	Overall survival	1	2008
BT_O18	GPL570	GSE20685	GSM519270	Breast cancer	Breast cancer	Overall survival	0	4417
BT_O18	GPL570	GSE20685	GSM519271	Breast cancer	Breast cancer	Overall survival	0	3431
BT_O18	GPL570	GSE20685	GSM519272	Breast cancer	Breast cancer	Overall survival	0	4052
BT_O18	GPL570	GSE20685	GSM519273	Breast cancer	Breast cancer	Overall survival	0	4417
BT_O18	GPL570	GSE20685	GSM519274	Breast cancer	Breast cancer	Overall survival	0	3942
BT_O18	GPL570	GSE20685	GSM519275	Breast cancer	Breast cancer	Overall survival	0	3723
BT_O18	GPL570	GSE20685	GSM519276	Breast cancer	Breast cancer	Overall survival	0	4526
BT_O18	GPL570	GSE20685	GSM519277	Breast cancer	Breast cancer	Overall survival	0	2701
BT_O18	GPL570	GSE20685	GSM519278	Breast cancer	Breast cancer	Overall survival	0	4234
BT_O18	GPL570	GSE20685	GSM519279	Breast cancer	Breast cancer	Overall survival	1	2738
BT_O18	GPL570	GSE20685	GSM519280	Breast cancer	Breast cancer	Overall survival	1	803
BT_O18	GPL570	GSE20685	GSM519281	Breast cancer	Breast cancer	Overall survival	0	2592
BT_O18	GPL570	GSE20685	GSM519282	Breast cancer	Breast cancer	Overall survival	0	3723
BT_O18	GPL570	GSE20685	GSM519283	Breast cancer	Breast cancer	Overall survival	0	3760
BT_O18	GPL570	GSE20685	GSM519284	Breast cancer	Breast cancer	Overall survival	0	4307
BT_O18	GPL570	GSE20685	GSM519285	Breast cancer	Breast cancer	Overall survival	1	4198
BT_O18	GPL570	GSE20685	GSM519286	Breast cancer	Breast cancer	Overall survival	0	3833
BT_O18	GPL570	GSE20685	GSM519287	Breast cancer	Breast cancer	Overall survival	0	4271
BT_O18	GPL570	GSE20685	GSM519288	Breast cancer	Breast cancer	Overall survival	0	4271
BT_O18	GPL570	GSE20685	GSM519289	Breast cancer	Breast cancer	Overall survival	1	584
BT_O18	GPL570	GSE20685	GSM519290	Breast cancer	Breast cancer	Overall survival	0	3650
BT_O18	GPL570	GSE20685	GSM519291	Breast cancer	Breast cancer	Overall survival	0	4271
BT_O18	GPL570	GSE20685	GSM519292	Breast cancer	Breast cancer	Overall survival	0	4563
BT_O18	GPL570	GSE20685	GSM519293	Breast cancer	Breast cancer	Overall survival	1	475
BT_O18	GPL570	GSE20685	GSM519294	Breast cancer	Breast cancer	Overall survival	0	3723
BT_O18	GPL570	GSE20685	GSM519295	Breast cancer	Breast cancer	Overall survival	0	3796
BT_O18	GPL570	GSE20685	GSM519296	Breast cancer	Breast cancer	Overall survival	0	4088
BT_O18	GPL570	GSE20685	GSM519297	Breast cancer	Breast cancer	Overall survival	0	3577
BT_O18	GPL570	GSE20685	GSM519298	Breast cancer	Breast cancer	Overall survival	1	438
BT_O18	GPL570	GSE20685	GSM519299	Breast cancer	Breast cancer	Overall survival	0	3431
BT_O18	GPL570	GSE20685	GSM519300	Breast cancer	Breast cancer	Overall survival	0	4125
BT_O18	GPL570	GSE20685	GSM519301	Breast cancer	Breast cancer	Overall survival	0	3650
BT_O18	GPL570	GSE20685	GSM519302	Breast cancer	Breast cancer	Overall survival	0	4198
BT_O18	GPL570	GSE20685	GSM519303	Breast cancer	Breast cancer	Overall survival	1	2592
BT_O18	GPL570	GSE20685	GSM519304	Breast cancer	Breast cancer	Overall survival	1	767
BT_O18	GPL570	GSE20685	GSM519305	Breast cancer	Breast cancer	Overall survival	1	657
BT_O18	GPL570	GSE20685	GSM519306	Breast cancer	Breast cancer	Overall survival	1	2117
BT_O18	GPL570	GSE20685	GSM519307	Breast cancer	Breast cancer	Overall survival	0	4125
BT_O18	GPL570	GSE20685	GSM519308	Breast cancer	Breast cancer	Overall survival	0	4052
BT_O18	GPL570	GSE20685	GSM519309	Breast cancer	Breast cancer	Overall survival	1	584
BT_O18	GPL570	GSE20685	GSM519310	Breast cancer	Breast cancer	Overall survival	1	1132
BT_O18	GPL570	GSE20685	GSM519311	Breast cancer	Breast cancer	Overall survival	0	3468
BT_O18	GPL570	GSE20685	GSM519312	Breast cancer	Breast cancer	Overall survival	0	4052
BT_O18	GPL570	GSE20685	GSM519313	Breast cancer	Breast cancer	Overall survival	0	4161
BT_O18	GPL570	GSE20685	GSM519314	Breast cancer	Breast cancer	Overall survival	0	3431
BT_O18	GPL570	GSE20685	GSM519315	Breast cancer	Breast cancer	Overall survival	0	3796
BT_O18	GPL570	GSE20685	GSM519316	Breast cancer	Breast cancer	Overall survival	0	4015
BT_O18	GPL570	GSE20685	GSM519317	Breast cancer	Breast cancer	Overall survival	0	4052
BT_O18	GPL570	GSE20685	GSM519318	Breast cancer	Breast cancer	Overall survival	0	2190
BT_O18	GPL570	GSE20685	GSM519319	Breast cancer	Breast cancer	Overall survival	0	3541
BT_O18	GPL570	GSE20685	GSM519320	Breast cancer	Breast cancer	Overall survival	0	4015
BT_O18	GPL570	GSE20685	GSM519321	Breast cancer	Breast cancer	Overall survival	0	4088
BT_O18	GPL570	GSE20685	GSM519322	Breast cancer	Breast cancer	Overall survival	1	1241
BT_O18	GPL570	GSE20685	GSM519323	Breast cancer	Breast cancer	Overall survival	1	3760
BT_O18	GPL570	GSE20685	GSM519324	Breast cancer	Breast cancer	Overall survival	1	1716
BT_O18	GPL570	GSE20685	GSM519325	Breast cancer	Breast cancer	Overall survival	0	4015
BT_O18	GPL570	GSE20685	GSM519326	Breast cancer	Breast cancer	Overall survival	0	4088
BT_O18	GPL570	GSE20685	GSM519327	Breast cancer	Breast cancer	Overall survival	1	2263
BT_O18	GPL570	GSE20685	GSM519328	Breast cancer	Breast cancer	Overall survival	0	2555
BT_O18	GPL570	GSE20685	GSM519329	Breast cancer	Breast cancer	Overall survival	0	3322
BT_O18	GPL570	GSE20685	GSM519330	Breast cancer	Breast cancer	Overall survival	0	3723
BT_O18	GPL570	GSE20685	GSM519331	Breast cancer	Breast cancer	Overall survival	0	4052
BT_O18	GPL570	GSE20685	GSM519332	Breast cancer	Breast cancer	Overall survival	0	4015
BT_O18	GPL570	GSE20685	GSM519333	Breast cancer	Breast cancer	Overall survival	1	2738
BT_O18	GPL570	GSE20685	GSM519334	Breast cancer	Breast cancer	Overall survival	0	3468
BT_O18	GPL570	GSE20685	GSM519335	Breast cancer	Breast cancer	Overall survival	0	4015
BT_O18	GPL570	GSE20685	GSM519336	Breast cancer	Breast cancer	Overall survival	0	4015
BT_O18	GPL570	GSE20685	GSM519337	Breast cancer	Breast cancer	Overall survival	1	986
BT_O18	GPL570	GSE20685	GSM519338	Breast cancer	Breast cancer	Overall survival	0	3650
BT_O18	GPL570	GSE20685	GSM519339	Breast cancer	Breast cancer	Overall survival	0	4015
BT_O18	GPL570	GSE20685	GSM519340	Breast cancer	Breast cancer	Overall survival	0	4015
BT_O18	GPL570	GSE20685	GSM519341	Breast cancer	Breast cancer	Overall survival	0	3942
BT_O18	GPL570	GSE20685	GSM519342	Breast cancer	Breast cancer	Overall survival	1	2008
BT_O18	GPL570	GSE20685	GSM519343	Breast cancer	Breast cancer	Overall survival	0	3650
BT_O18	GPL570	GSE20685	GSM519344	Breast cancer	Breast cancer	Overall survival	0	3614
BT_O18	GPL570	GSE20685	GSM519345	Breast cancer	Breast cancer	Overall survival	0	3358
BT_O18	GPL570	GSE20685	GSM519346	Breast cancer	Breast cancer	Overall survival	0	3869
BT_O18	GPL570	GSE20685	GSM519347	Breast cancer	Breast cancer	Overall survival	1	3687
BT_O18	GPL570	GSE20685	GSM519348	Breast cancer	Breast cancer	Overall survival	0	3833
BT_O18	GPL570	GSE20685	GSM519349	Breast cancer	Breast cancer	Overall survival	1	694
BT_O18	GPL570	GSE20685	GSM519350	Breast cancer	Breast cancer	Overall survival	0	3358
BT_O18	GPL570	GSE20685	GSM519351	Breast cancer	Breast cancer	Overall survival	0	2884
BT_O18	GPL570	GSE20685	GSM519352	Breast cancer	Breast cancer	Overall survival	1	2957
BT_O18	GPL570	GSE20685	GSM519353	Breast cancer	Breast cancer	Overall survival	0	2738
BT_O18	GPL570	GSE20685	GSM519354	Breast cancer	Breast cancer	Overall survival	0	3431
BT_O18	GPL570	GSE20685	GSM519355	Breast cancer	Breast cancer	Overall survival	0	3869
BT_O18	GPL570	GSE20685	GSM519356	Breast cancer	Breast cancer	Overall survival	0	3723
BT_O18	GPL570	GSE20685	GSM519357	Breast cancer	Breast cancer	Overall survival	1	1935
BT_O18	GPL570	GSE20685	GSM519358	Breast cancer	Breast cancer	Overall survival	0	3249
BT_O18	GPL570	GSE20685	GSM519359	Breast cancer	Breast cancer	Overall survival	1	475
BT_O18	GPL570	GSE20685	GSM519360	Breast cancer	Breast cancer	Overall survival	0	3285
BT_O18	GPL570	GSE20685	GSM519361	Breast cancer	Breast cancer	Overall survival	0	3066
BT_O18	GPL570	GSE20685	GSM519362	Breast cancer	Breast cancer	Overall survival	0	3322
BT_O18	GPL570	GSE20685	GSM519363	Breast cancer	Breast cancer	Overall survival	0	3176
BT_O18	GPL570	GSE20685	GSM519364	Breast cancer	Breast cancer	Overall survival	0	3760
BT_O18	GPL570	GSE20685	GSM519365	Breast cancer	Breast cancer	Overall survival	0	3504
BT_O18	GPL570	GSE20685	GSM519366	Breast cancer	Breast cancer	Overall survival	0	3687
BT_O18	GPL570	GSE20685	GSM519367	Breast cancer	Breast cancer	Overall survival	1	1351
BT_O18	GPL570	GSE20685	GSM519368	Breast cancer	Breast cancer	Overall survival	1	1241
BT_O18	GPL570	GSE20685	GSM519369	Breast cancer	Breast cancer	Overall survival	0	3796
BT_O18	GPL570	GSE20685	GSM519370	Breast cancer	Breast cancer	Overall survival	1	1825
BT_O18	GPL570	GSE20685	GSM519371	Breast cancer	Breast cancer	Overall survival	1	2738
BT_O18	GPL570	GSE20685	GSM519372	Breast cancer	Breast cancer	Overall survival	0	3687
BT_O18	GPL570	GSE20685	GSM519373	Breast cancer	Breast cancer	Overall survival	0	2628
BT_O18	GPL570	GSE20685	GSM519374	Breast cancer	Breast cancer	Overall survival	0	3687
BT_O18	GPL570	GSE20685	GSM519375	Breast cancer	Breast cancer	Overall survival	0	3249
BT_O18	GPL570	GSE20685	GSM519376	Breast cancer	Breast cancer	Overall survival	0	3431
BT_O18	GPL570	GSE20685	GSM519377	Breast cancer	Breast cancer	Overall survival	0	3723
BT_O18	GPL570	GSE20685	GSM519378	Breast cancer	Breast cancer	Overall survival	0	3431
BT_O18	GPL570	GSE20685	GSM519379	Breast cancer	Breast cancer	Overall survival	0	3358
BT_O18	GPL570	GSE20685	GSM519380	Breast cancer	Breast cancer	Overall survival	0	3358
BT_O18	GPL570	GSE20685	GSM519381	Breast cancer	Breast cancer	Overall survival	0	3614
BT_O18	GPL570	GSE20685	GSM519382	Breast cancer	Breast cancer	Overall survival	1	1132
BT_O18	GPL570	GSE20685	GSM519383	Breast cancer	Breast cancer	Overall survival	0	3577
BT_O18	GPL570	GSE20685	GSM519384	Breast cancer	Breast cancer	Overall survival	0	3030
BT_O18	GPL570	GSE20685	GSM519385	Breast cancer	Breast cancer	Overall survival	0	3577
BT_O18	GPL570	GSE20685	GSM519386	Breast cancer	Breast cancer	Overall survival	0	3796
BT_O18	GPL570	GSE20685	GSM519387	Breast cancer	Breast cancer	Overall survival	0	3249
BT_O18	GPL570	GSE20685	GSM519388	Breast cancer	Breast cancer	Overall survival	0	3468
BT_O18	GPL570	GSE20685	GSM519389	Breast cancer	Breast cancer	Overall survival	0	3468
BT_O18	GPL570	GSE20685	GSM519390	Breast cancer	Breast cancer	Overall survival	0	3504
BT_O18	GPL570	GSE20685	GSM519391	Breast cancer	Breast cancer	Overall survival	0	3504
BT_O18	GPL570	GSE20685	GSM519392	Breast cancer	Breast cancer	Overall survival	0	3030
BT_O18	GPL570	GSE20685	GSM519393	Breast cancer	Breast cancer	Overall survival	0	3431
BT_O18	GPL570	GSE20685	GSM519394	Breast cancer	Breast cancer	Overall survival	0	3431
BT_O18	GPL570	GSE20685	GSM519395	Breast cancer	Breast cancer	Overall survival	0	3139
BT_O18	GPL570	GSE20685	GSM519396	Breast cancer	Breast cancer	Overall survival	1	2409
BT_O18	GPL570	GSE20685	GSM519397	Breast cancer	Breast cancer	Overall survival	0	3395
BT_O18	GPL570	GSE20685	GSM519398	Breast cancer	Breast cancer	Overall survival	1	2555
BT_O18	GPL570	GSE20685	GSM519399	Breast cancer	Breast cancer	Overall survival	0	3322
BT_O18	GPL570	GSE20685	GSM519400	Breast cancer	Breast cancer	Overall survival	1	1205
BT_O18	GPL570	GSE20685	GSM519401	Breast cancer	Breast cancer	Overall survival	0	3285
BT_O18	GPL570	GSE20685	GSM519402	Breast cancer	Breast cancer	Overall survival	0	2957
BT_O18	GPL570	GSE20685	GSM519403	Breast cancer	Breast cancer	Overall survival	1	146
BT_O18	GPL570	GSE20685	GSM519404	Breast cancer	Breast cancer	Overall survival	0	3322
BT_O18	GPL570	GSE20685	GSM519405	Breast cancer	Breast cancer	Overall survival	0	3249
BT_O18	GPL570	GSE20685	GSM519406	Breast cancer	Breast cancer	Overall survival	0	3249
BT_O18	GPL570	GSE20685	GSM519407	Breast cancer	Breast cancer	Overall survival	0	2993
BT_O18	GPL570	GSE20685	GSM519408	Breast cancer	Breast cancer	Overall survival	0	2811
BT_O18	GPL570	GSE20685	GSM519409	Breast cancer	Breast cancer	Overall survival	0	3176
BT_O18	GPL570	GSE20685	GSM519410	Breast cancer	Breast cancer	Overall survival	0	2957
BT_O18	GPL570	GSE20685	GSM519411	Breast cancer	Breast cancer	Overall survival	0	3139
BT_O18	GPL570	GSE20685	GSM519412	Breast cancer	Breast cancer	Overall survival	0	3285
BT_O18	GPL570	GSE20685	GSM519413	Breast cancer	Breast cancer	Overall survival	0	2847
BT_O18	GPL570	GSE20685	GSM519414	Breast cancer	Breast cancer	Overall survival	0	3176
BT_O18	GPL570	GSE20685	GSM519415	Breast cancer	Breast cancer	Overall survival	0	3066
BT_O18	GPL570	GSE20685	GSM519416	Breast cancer	Breast cancer	Overall survival	0	3030
BT_O18	GPL570	GSE20685	GSM519417	Breast cancer	Breast cancer	Overall survival	1	876
BT_O18	GPL570	GSE20685	GSM519418	Breast cancer	Breast cancer	Overall survival	0	3103
BT_O18	GPL570	GSE20685	GSM519419	Breast cancer	Breast cancer	Overall survival	1	1059
BT_O18	GPL570	GSE20685	GSM519420	Breast cancer	Breast cancer	Overall survival	0	2957
BT_O18	GPL570	GSE20685	GSM519421	Breast cancer	Breast cancer	Overall survival	0	2957
BT_O18	GPL570	GSE20685	GSM519422	Breast cancer	Breast cancer	Overall survival	0	2920
BT_O18	GPL570	GSE20685	GSM519423	Breast cancer	Breast cancer	Overall survival	0	2920
BT_O18	GPL570	GSE20685	GSM519424	Breast cancer	Breast cancer	Overall survival	0	3066
BT_O18	GPL570	GSE20685	GSM519425	Breast cancer	Breast cancer	Overall survival	1	1278
BT_O18	GPL570	GSE20685	GSM519426	Breast cancer	Breast cancer	Overall survival	0	2957
BT_O18	GPL570	GSE20685	GSM519427	Breast cancer	Breast cancer	Overall survival	0	3103
BT_O18	GPL570	GSE20685	GSM519428	Breast cancer	Breast cancer	Overall survival	0	2957
BT_O18	GPL570	GSE20685	GSM519429	Breast cancer	Breast cancer	Overall survival	0	2336
BT_O18	GPL570	GSE20685	GSM519430	Breast cancer	Breast cancer	Overall survival	0	548
BT_O18	GPL570	GSE20685	GSM519431	Breast cancer	Breast cancer	Overall survival	1	2482
BT_O18	GPL570	GSE20685	GSM519432	Breast cancer	Breast cancer	Overall survival	0	2446
BT_O18	GPL570	GSE20685	GSM519433	Breast cancer	Breast cancer	Overall survival	0	2373
BT_O18	GPL570	GSE20685	GSM519434	Breast cancer	Breast cancer	Overall survival	1	1460
BT_O18	GPL570	GSE20685	GSM519435	Breast cancer	Breast cancer	Overall survival	0	2117
BT_O18	GPL570	GSE20685	GSM519436	Breast cancer	Breast cancer	Overall survival	0	1825
BT_O18	GPL570	GSE20685	GSM519437	Breast cancer	Breast cancer	Overall survival	0	1935
BT_O18	GPL570	GSE20685	GSM519438	Breast cancer	Breast cancer	Overall survival	0	1789
BT_O18	GPL570	GSE20685	GSM519439	Breast cancer	Breast cancer	Overall survival	0	1716
BT_O18	GPL570	GSE20685	GSM519440	Breast cancer	Breast cancer	Overall survival	0	1497
BT_O18	GPL570	GSE20685	GSM519441	Breast cancer	Breast cancer	Overall survival	0	1387
BT_O18	GPL570	GSE20685	GSM519442	Breast cancer	Breast cancer	Overall survival	0	1387
BT_O18	GPL570	GSE20685	GSM519443	Breast cancer	Breast cancer	Overall survival	0	2957
BT_O19	GPL570	GSE20685	GSM519133	Breast cancer	Breast cancer	Metastasis-free survival	1	584
BT_O19	GPL570	GSE20685	GSM519135	Breast cancer	Breast cancer	Metastasis-free survival	1	621
BT_O19	GPL570	GSE20685	GSM519136	Breast cancer	Breast cancer	Metastasis-free survival	1	1862
BT_O19	GPL570	GSE20685	GSM519141	Breast cancer	Breast cancer	Metastasis-free survival	1	511
BT_O19	GPL570	GSE20685	GSM519144	Breast cancer	Breast cancer	Metastasis-free survival	1	292
BT_O19	GPL570	GSE20685	GSM519145	Breast cancer	Breast cancer	Metastasis-free survival	1	2081
BT_O19	GPL570	GSE20685	GSM519146	Breast cancer	Breast cancer	Metastasis-free survival	1	1497
BT_O19	GPL570	GSE20685	GSM519149	Breast cancer	Breast cancer	Metastasis-free survival	1	949
BT_O19	GPL570	GSE20685	GSM519153	Breast cancer	Breast cancer	Metastasis-free survival	1	1095
BT_O19	GPL570	GSE20685	GSM519154	Breast cancer	Breast cancer	Metastasis-free survival	1	256
BT_O19	GPL570	GSE20685	GSM519166	Breast cancer	Breast cancer	Metastasis-free survival	1	438
BT_O19	GPL570	GSE20685	GSM519172	Breast cancer	Breast cancer	Metastasis-free survival	1	584
BT_O19	GPL570	GSE20685	GSM519193	Breast cancer	Breast cancer	Metastasis-free survival	1	767
BT_O19	GPL570	GSE20685	GSM519197	Breast cancer	Breast cancer	Metastasis-free survival	1	2993
BT_O19	GPL570	GSE20685	GSM519200	Breast cancer	Breast cancer	Metastasis-free survival	1	1059
BT_O19	GPL570	GSE20685	GSM519202	Breast cancer	Breast cancer	Metastasis-free survival	1	876
BT_O19	GPL570	GSE20685	GSM519203	Breast cancer	Breast cancer	Metastasis-free survival	1	1278
BT_O19	GPL570	GSE20685	GSM519204	Breast cancer	Breast cancer	Metastasis-free survival	1	584
BT_O19	GPL570	GSE20685	GSM519212	Breast cancer	Breast cancer	Metastasis-free survival	1	1752
BT_O19	GPL570	GSE20685	GSM519213	Breast cancer	Breast cancer	Metastasis-free survival	1	1387
BT_O19	GPL570	GSE20685	GSM519217	Breast cancer	Breast cancer	Metastasis-free survival	1	329
BT_O19	GPL570	GSE20685	GSM519222	Breast cancer	Breast cancer	Metastasis-free survival	1	1314
BT_O19	GPL570	GSE20685	GSM519223	Breast cancer	Breast cancer	Metastasis-free survival	1	183
BT_O19	GPL570	GSE20685	GSM519224	Breast cancer	Breast cancer	Metastasis-free survival	1	2154
BT_O19	GPL570	GSE20685	GSM519225	Breast cancer	Breast cancer	Metastasis-free survival	1	1460
BT_O19	GPL570	GSE20685	GSM519229	Breast cancer	Breast cancer	Metastasis-free survival	1	986
BT_O19	GPL570	GSE20685	GSM519235	Breast cancer	Breast cancer	Metastasis-free survival	1	767
BT_O19	GPL570	GSE20685	GSM519236	Breast cancer	Breast cancer	Metastasis-free survival	1	621
BT_O19	GPL570	GSE20685	GSM519239	Breast cancer	Breast cancer	Metastasis-free survival	1	1168
BT_O19	GPL570	GSE20685	GSM519245	Breast cancer	Breast cancer	Metastasis-free survival	1	1424
BT_O19	GPL570	GSE20685	GSM519246	Breast cancer	Breast cancer	Metastasis-free survival	1	2482
BT_O19	GPL570	GSE20685	GSM519248	Breast cancer	Breast cancer	Metastasis-free survival	1	1935
BT_O19	GPL570	GSE20685	GSM519256	Breast cancer	Breast cancer	Metastasis-free survival	1	3869
BT_O19	GPL570	GSE20685	GSM519257	Breast cancer	Breast cancer	Metastasis-free survival	1	621
BT_O19	GPL570	GSE20685	GSM519263	Breast cancer	Breast cancer	Metastasis-free survival	1	730
BT_O19	GPL570	GSE20685	GSM519265	Breast cancer	Breast cancer	Metastasis-free survival	1	1862
BT_O19	GPL570	GSE20685	GSM519266	Breast cancer	Breast cancer	Metastasis-free survival	1	329
BT_O19	GPL570	GSE20685	GSM519267	Breast cancer	Breast cancer	Metastasis-free survival	1	3212
BT_O19	GPL570	GSE20685	GSM519269	Breast cancer	Breast cancer	Metastasis-free survival	1	1059
BT_O19	GPL570	GSE20685	GSM519279	Breast cancer	Breast cancer	Metastasis-free survival	1	1752
BT_O19	GPL570	GSE20685	GSM519280	Breast cancer	Breast cancer	Metastasis-free survival	1	475
BT_O19	GPL570	GSE20685	GSM519291	Breast cancer	Breast cancer	Metastasis-free survival	1	2665
BT_O19	GPL570	GSE20685	GSM519292	Breast cancer	Breast cancer	Metastasis-free survival	1	876
BT_O19	GPL570	GSE20685	GSM519298	Breast cancer	Breast cancer	Metastasis-free survival	1	438
BT_O19	GPL570	GSE20685	GSM519303	Breast cancer	Breast cancer	Metastasis-free survival	1	2227
BT_O19	GPL570	GSE20685	GSM519304	Breast cancer	Breast cancer	Metastasis-free survival	1	548
BT_O19	GPL570	GSE20685	GSM519305	Breast cancer	Breast cancer	Metastasis-free survival	1	402
BT_O19	GPL570	GSE20685	GSM519306	Breast cancer	Breast cancer	Metastasis-free survival	1	876
BT_O19	GPL570	GSE20685	GSM519309	Breast cancer	Breast cancer	Metastasis-free survival	1	402
BT_O19	GPL570	GSE20685	GSM519322	Breast cancer	Breast cancer	Metastasis-free survival	1	365
BT_O19	GPL570	GSE20685	GSM519324	Breast cancer	Breast cancer	Metastasis-free survival	1	584
BT_O19	GPL570	GSE20685	GSM519327	Breast cancer	Breast cancer	Metastasis-free survival	1	1132
BT_O19	GPL570	GSE20685	GSM519330	Breast cancer	Breast cancer	Metastasis-free survival	1	2081
BT_O19	GPL570	GSE20685	GSM519333	Breast cancer	Breast cancer	Metastasis-free survival	1	1168
BT_O19	GPL570	GSE20685	GSM519337	Breast cancer	Breast cancer	Metastasis-free survival	1	949
BT_O19	GPL570	GSE20685	GSM519342	Breast cancer	Breast cancer	Metastasis-free survival	1	876
BT_O19	GPL570	GSE20685	GSM519347	Breast cancer	Breast cancer	Metastasis-free survival	1	73
BT_O19	GPL570	GSE20685	GSM519349	Breast cancer	Breast cancer	Metastasis-free survival	1	657
BT_O19	GPL570	GSE20685	GSM519352	Breast cancer	Breast cancer	Metastasis-free survival	1	1716
BT_O19	GPL570	GSE20685	GSM519357	Breast cancer	Breast cancer	Metastasis-free survival	1	1424
BT_O19	GPL570	GSE20685	GSM519359	Breast cancer	Breast cancer	Metastasis-free survival	1	475
BT_O19	GPL570	GSE20685	GSM519367	Breast cancer	Breast cancer	Metastasis-free survival	1	986
BT_O19	GPL570	GSE20685	GSM519368	Breast cancer	Breast cancer	Metastasis-free survival	1	621
BT_O19	GPL570	GSE20685	GSM519370	Breast cancer	Breast cancer	Metastasis-free survival	1	1241
BT_O19	GPL570	GSE20685	GSM519371	Breast cancer	Breast cancer	Metastasis-free survival	1	1533
BT_O19	GPL570	GSE20685	GSM519382	Breast cancer	Breast cancer	Metastasis-free survival	1	1059
BT_O19	GPL570	GSE20685	GSM519396	Breast cancer	Breast cancer	Metastasis-free survival	1	1862
BT_O19	GPL570	GSE20685	GSM519398	Breast cancer	Breast cancer	Metastasis-free survival	1	2081
BT_O19	GPL570	GSE20685	GSM519400	Breast cancer	Breast cancer	Metastasis-free survival	1	329
BT_O19	GPL570	GSE20685	GSM519417	Breast cancer	Breast cancer	Metastasis-free survival	1	548
BT_O19	GPL570	GSE20685	GSM519419	Breast cancer	Breast cancer	Metastasis-free survival	1	767
BT_O19	GPL570	GSE20685	GSM519427	Breast cancer	Breast cancer	Metastasis-free survival	1	1351
BT_O19	GPL570	GSE20685	GSM519429	Breast cancer	Breast cancer	Metastasis-free survival	1	2117
BT_O19	GPL570	GSE20685	GSM519431	Breast cancer	Breast cancer	Metastasis-free survival	1	2446
BT_O19	GPL570	GSE20685	GSM519434	Breast cancer	Breast cancer	Metastasis-free survival	1	767
BT_O20	GPL570	GSE20685	GSM519126	Breast cancer	Breast cancer	Relapse-free survival	1	1278
BT_O20	GPL570	GSE20685	GSM519133	Breast cancer	Breast cancer	Relapse-free survival	1	402
BT_O20	GPL570	GSE20685	GSM519149	Breast cancer	Breast cancer	Relapse-free survival	1	840
BT_O20	GPL570	GSE20685	GSM519154	Breast cancer	Breast cancer	Relapse-free survival	1	219
BT_O20	GPL570	GSE20685	GSM519166	Breast cancer	Breast cancer	Relapse-free survival	1	438
BT_O20	GPL570	GSE20685	GSM519197	Breast cancer	Breast cancer	Relapse-free survival	1	2628
BT_O20	GPL570	GSE20685	GSM519209	Breast cancer	Breast cancer	Relapse-free survival	1	4088
BT_O20	GPL570	GSE20685	GSM519224	Breast cancer	Breast cancer	Relapse-free survival	1	1570
BT_O20	GPL570	GSE20685	GSM519237	Breast cancer	Breast cancer	Relapse-free survival	1	256
BT_O20	GPL570	GSE20685	GSM519239	Breast cancer	Breast cancer	Relapse-free survival	1	475
BT_O20	GPL570	GSE20685	GSM519259	Breast cancer	Breast cancer	Relapse-free survival	1	2373
BT_O20	GPL570	GSE20685	GSM519260	Breast cancer	Breast cancer	Relapse-free survival	1	1825
BT_O20	GPL570	GSE20685	GSM519267	Breast cancer	Breast cancer	Relapse-free survival	1	3176
BT_O20	GPL570	GSE20685	GSM519269	Breast cancer	Breast cancer	Relapse-free survival	1	949
BT_O20	GPL570	GSE20685	GSM519286	Breast cancer	Breast cancer	Relapse-free survival	1	3468
BT_O20	GPL570	GSE20685	GSM519287	Breast cancer	Breast cancer	Relapse-free survival	1	2957
BT_O20	GPL570	GSE20685	GSM519323	Breast cancer	Breast cancer	Relapse-free survival	1	1679
BT_O20	GPL570	GSE20685	GSM519336	Breast cancer	Breast cancer	Relapse-free survival	1	2738
BT_O20	GPL570	GSE20685	GSM519347	Breast cancer	Breast cancer	Relapse-free survival	1	73
BT_O20	GPL570	GSE20685	GSM519352	Breast cancer	Breast cancer	Relapse-free survival	1	621
BT_O20	GPL570	GSE20685	GSM519370	Breast cancer	Breast cancer	Relapse-free survival	1	475
[truncated: 15,665 more rows]
