# Supplementary material for: lnCAR: A Comprehensive Resource for lncRNAs from Cancer Arrays
Source: Oxford University Press journal article supplement (doi:10.1158/0008-5472.can-18-2169), 2019-02-20
Supplement: 00085472can182169-sup-205230_3_supp_5304840_ply323.xlsx [file 00085472can182169-sup-205230_3_supp_5304840_ply323.xlsx]

## Sheet: Table S4
Table S4 Sample information of all the datasets used for differential expression analysis
AnalysisID	Platform	Study	GSM	Cancer	Subtype	Condition	Design
BC_S1	GPL6244	GSE83586	GSM2212901	Bladder cancer	Bladder cancer	High grade(G3/4)	High grade-Low grade
BC_S1	GPL6244	GSE83586	GSM2212904	Bladder cancer	Bladder cancer	High grade(G3/4)	High grade-Low grade
BC_S1	GPL6244	GSE83586	GSM2212905	Bladder cancer	Bladder cancer	High grade(G3/4)	High grade-Low grade
BC_S1	GPL6244	GSE83586	GSM2212906	Bladder cancer	Bladder cancer	High grade(G3/4)	High grade-Low grade
BC_S1	GPL6244	GSE83586	GSM2212907	Bladder cancer	Bladder cancer	High grade(G3/4)	High grade-Low grade
BC_S1	GPL6244	GSE83586	GSM2212909	Bladder cancer	Bladder cancer	High grade(G3/4)	High grade-Low grade
BC_S1	GPL6244	GSE83586	GSM2212910	Bladder cancer	Bladder cancer	High grade(G3/4)	High grade-Low grade
BC_S1	GPL6244	GSE83586	GSM2212911	Bladder cancer	Bladder cancer	High grade(G3/4)	High grade-Low grade
BC_S1	GPL6244	GSE83586	GSM2212912	Bladder cancer	Bladder cancer	High grade(G3/4)	High grade-Low grade
BC_S1	GPL6244	GSE83586	GSM2212913	Bladder cancer	Bladder cancer	Low grade(G1/2)	High grade-Low grade
BC_S1	GPL6244	GSE83586	GSM2212914	Bladder cancer	Bladder cancer	High grade(G3/4)	High grade-Low grade
BC_S1	GPL6244	GSE83586	GSM2212915	Bladder cancer	Bladder cancer	High grade(G3/4)	High grade-Low grade
BC_S1	GPL6244	GSE83586	GSM2212916	Bladder cancer	Bladder cancer	High grade(G3/4)	High grade-Low grade
BC_S1	GPL6244	GSE83586	GSM2212917	Bladder cancer	Bladder cancer	High grade(G3/4)	High grade-Low grade
BC_S1	GPL6244	GSE83586	GSM2212918	Bladder cancer	Bladder cancer	High grade(G3/4)	High grade-Low grade
BC_S1	GPL6244	GSE83586	GSM2212919	Bladder cancer	Bladder cancer	High grade(G3/4)	High grade-Low grade
BC_S1	GPL6244	GSE83586	GSM2212920	Bladder cancer	Bladder cancer	High grade(G3/4)	High grade-Low grade
BC_S1	GPL6244	GSE83586	GSM2212921	Bladder cancer	Bladder cancer	High grade(G3/4)	High grade-Low grade
BC_S1	GPL6244	GSE83586	GSM2212922	Bladder cancer	Bladder cancer	High grade(G3/4)	High grade-Low grade
BC_S1	GPL6244	GSE83586	GSM2212923	Bladder cancer	Bladder cancer	High grade(G3/4)	High grade-Low grade
BC_S1	GPL6244	GSE83586	GSM2212924	Bladder cancer	Bladder cancer	High grade(G3/4)	High grade-Low grade
BC_S1	GPL6244	GSE83586	GSM2212925	Bladder cancer	Bladder cancer	High grade(G3/4)	High grade-Low grade
BC_S1	GPL6244	GSE83586	GSM2212926	Bladder cancer	Bladder cancer	High grade(G3/4)	High grade-Low grade
BC_S1	GPL6244	GSE83586	GSM2212927	Bladder cancer	Bladder cancer	High grade(G3/4)	High grade-Low grade
BC_S1	GPL6244	GSE83586	GSM2212928	Bladder cancer	Bladder cancer	High grade(G3/4)	High grade-Low grade
BC_S1	GPL6244	GSE83586	GSM2212929	Bladder cancer	Bladder cancer	High grade(G3/4)	High grade-Low grade
BC_S1	GPL6244	GSE83586	GSM2212930	Bladder cancer	Bladder cancer	High grade(G3/4)	High grade-Low grade
BC_S1	GPL6244	GSE83586	GSM2212931	Bladder cancer	Bladder cancer	High grade(G3/4)	High grade-Low grade
BC_S1	GPL6244	GSE83586	GSM2212932	Bladder cancer	Bladder cancer	High grade(G3/4)	High grade-Low grade
BC_S1	GPL6244	GSE83586	GSM2212933	Bladder cancer	Bladder cancer	High grade(G3/4)	High grade-Low grade
BC_S1	GPL6244	GSE83586	GSM2212934	Bladder cancer	Bladder cancer	High grade(G3/4)	High grade-Low grade
BC_S1	GPL6244	GSE83586	GSM2212935	Bladder cancer	Bladder cancer	High grade(G3/4)	High grade-Low grade
BC_S1	GPL6244	GSE83586	GSM2212936	Bladder cancer	Bladder cancer	High grade(G3/4)	High grade-Low grade
BC_S1	GPL6244	GSE83586	GSM2212937	Bladder cancer	Bladder cancer	High grade(G3/4)	High grade-Low grade
BC_S1	GPL6244	GSE83586	GSM2212938	Bladder cancer	Bladder cancer	High grade(G3/4)	High grade-Low grade
BC_S1	GPL6244	GSE83586	GSM2212939	Bladder cancer	Bladder cancer	High grade(G3/4)	High grade-Low grade
BC_S1	GPL6244	GSE83586	GSM2212940	Bladder cancer	Bladder cancer	High grade(G3/4)	High grade-Low grade
BC_S1	GPL6244	GSE83586	GSM2212941	Bladder cancer	Bladder cancer	High grade(G3/4)	High grade-Low grade
BC_S1	GPL6244	GSE83586	GSM2212942	Bladder cancer	Bladder cancer	High grade(G3/4)	High grade-Low grade
BC_S1	GPL6244	GSE83586	GSM2212943	Bladder cancer	Bladder cancer	High grade(G3/4)	High grade-Low grade
BC_S1	GPL6244	GSE83586	GSM2212944	Bladder cancer	Bladder cancer	High grade(G3/4)	High grade-Low grade
BC_S1	GPL6244	GSE83586	GSM2212945	Bladder cancer	Bladder cancer	Low grade(G1/2)	High grade-Low grade
BC_S1	GPL6244	GSE83586	GSM2212946	Bladder cancer	Bladder cancer	Low grade(G1/2)	High grade-Low grade
BC_S1	GPL6244	GSE83586	GSM2212947	Bladder cancer	Bladder cancer	High grade(G3/4)	High grade-Low grade
BC_S1	GPL6244	GSE83586	GSM2212948	Bladder cancer	Bladder cancer	High grade(G3/4)	High grade-Low grade
BC_S1	GPL6244	GSE83586	GSM2212949	Bladder cancer	Bladder cancer	High grade(G3/4)	High grade-Low grade
BC_S1	GPL6244	GSE83586	GSM2212950	Bladder cancer	Bladder cancer	High grade(G3/4)	High grade-Low grade
BC_S1	GPL6244	GSE83586	GSM2212951	Bladder cancer	Bladder cancer	High grade(G3/4)	High grade-Low grade
BC_S1	GPL6244	GSE83586	GSM2212952	Bladder cancer	Bladder cancer	High grade(G3/4)	High grade-Low grade
BC_S1	GPL6244	GSE83586	GSM2212953	Bladder cancer	Bladder cancer	High grade(G3/4)	High grade-Low grade
BC_S1	GPL6244	GSE83586	GSM2212954	Bladder cancer	Bladder cancer	Low grade(G1/2)	High grade-Low grade
BC_S1	GPL6244	GSE83586	GSM2212955	Bladder cancer	Bladder cancer	High grade(G3/4)	High grade-Low grade
BC_S1	GPL6244	GSE83586	GSM2212956	Bladder cancer	Bladder cancer	High grade(G3/4)	High grade-Low grade
BC_S1	GPL6244	GSE83586	GSM2212957	Bladder cancer	Bladder cancer	High grade(G3/4)	High grade-Low grade
BC_S1	GPL6244	GSE83586	GSM2212958	Bladder cancer	Bladder cancer	High grade(G3/4)	High grade-Low grade
BC_S1	GPL6244	GSE83586	GSM2212959	Bladder cancer	Bladder cancer	High grade(G3/4)	High grade-Low grade
BC_S1	GPL6244	GSE83586	GSM2212960	Bladder cancer	Bladder cancer	High grade(G3/4)	High grade-Low grade
BC_S1	GPL6244	GSE83586	GSM2212961	Bladder cancer	Bladder cancer	High grade(G3/4)	High grade-Low grade
BC_S1	GPL6244	GSE83586	GSM2212962	Bladder cancer	Bladder cancer	High grade(G3/4)	High grade-Low grade
BC_S1	GPL6244	GSE83586	GSM2212963	Bladder cancer	Bladder cancer	High grade(G3/4)	High grade-Low grade
BC_S1	GPL6244	GSE83586	GSM2212964	Bladder cancer	Bladder cancer	High grade(G3/4)	High grade-Low grade
BC_S1	GPL6244	GSE83586	GSM2212965	Bladder cancer	Bladder cancer	High grade(G3/4)	High grade-Low grade
BC_S1	GPL6244	GSE83586	GSM2212966	Bladder cancer	Bladder cancer	High grade(G3/4)	High grade-Low grade
BC_S1	GPL6244	GSE83586	GSM2212967	Bladder cancer	Bladder cancer	High grade(G3/4)	High grade-Low grade
BC_S1	GPL6244	GSE83586	GSM2212968	Bladder cancer	Bladder cancer	Low grade(G1/2)	High grade-Low grade
BC_S1	GPL6244	GSE83586	GSM2212969	Bladder cancer	Bladder cancer	High grade(G3/4)	High grade-Low grade
BC_S1	GPL6244	GSE83586	GSM2212970	Bladder cancer	Bladder cancer	High grade(G3/4)	High grade-Low grade
BC_S1	GPL6244	GSE83586	GSM2212971	Bladder cancer	Bladder cancer	Low grade(G1/2)	High grade-Low grade
BC_S1	GPL6244	GSE83586	GSM2212972	Bladder cancer	Bladder cancer	High grade(G3/4)	High grade-Low grade
BC_S1	GPL6244	GSE83586	GSM2212973	Bladder cancer	Bladder cancer	High grade(G3/4)	High grade-Low grade
BC_S1	GPL6244	GSE83586	GSM2212974	Bladder cancer	Bladder cancer	High grade(G3/4)	High grade-Low grade
BC_S1	GPL6244	GSE83586	GSM2212975	Bladder cancer	Bladder cancer	High grade(G3/4)	High grade-Low grade
BC_S1	GPL6244	GSE83586	GSM2212976	Bladder cancer	Bladder cancer	High grade(G3/4)	High grade-Low grade
BC_S1	GPL6244	GSE83586	GSM2212977	Bladder cancer	Bladder cancer	High grade(G3/4)	High grade-Low grade
BC_S1	GPL6244	GSE83586	GSM2212978	Bladder cancer	Bladder cancer	High grade(G3/4)	High grade-Low grade
BC_S1	GPL6244	GSE83586	GSM2212979	Bladder cancer	Bladder cancer	Low grade(G1/2)	High grade-Low grade
BC_S1	GPL6244	GSE83586	GSM2212980	Bladder cancer	Bladder cancer	High grade(G3/4)	High grade-Low grade
BC_S1	GPL6244	GSE83586	GSM2212981	Bladder cancer	Bladder cancer	High grade(G3/4)	High grade-Low grade
BC_S1	GPL6244	GSE83586	GSM2212982	Bladder cancer	Bladder cancer	High grade(G3/4)	High grade-Low grade
BC_S1	GPL6244	GSE83586	GSM2212983	Bladder cancer	Bladder cancer	High grade(G3/4)	High grade-Low grade
BC_S1	GPL6244	GSE83586	GSM2212984	Bladder cancer	Bladder cancer	High grade(G3/4)	High grade-Low grade
BC_S1	GPL6244	GSE83586	GSM2212985	Bladder cancer	Bladder cancer	High grade(G3/4)	High grade-Low grade
BC_S1	GPL6244	GSE83586	GSM2212987	Bladder cancer	Bladder cancer	Low grade(G1/2)	High grade-Low grade
BC_S1	GPL6244	GSE83586	GSM2212988	Bladder cancer	Bladder cancer	High grade(G3/4)	High grade-Low grade
BC_S1	GPL6244	GSE83586	GSM2212989	Bladder cancer	Bladder cancer	High grade(G3/4)	High grade-Low grade
BC_S1	GPL6244	GSE83586	GSM2212990	Bladder cancer	Bladder cancer	High grade(G3/4)	High grade-Low grade
BC_S1	GPL6244	GSE83586	GSM2212991	Bladder cancer	Bladder cancer	High grade(G3/4)	High grade-Low grade
BC_S1	GPL6244	GSE83586	GSM2212992	Bladder cancer	Bladder cancer	High grade(G3/4)	High grade-Low grade
BC_S1	GPL6244	GSE83586	GSM2212993	Bladder cancer	Bladder cancer	High grade(G3/4)	High grade-Low grade
BC_S1	GPL6244	GSE83586	GSM2212994	Bladder cancer	Bladder cancer	High grade(G3/4)	High grade-Low grade
BC_S1	GPL6244	GSE83586	GSM2212995	Bladder cancer	Bladder cancer	High grade(G3/4)	High grade-Low grade
BC_S1	GPL6244	GSE83586	GSM2212996	Bladder cancer	Bladder cancer	High grade(G3/4)	High grade-Low grade
BC_S1	GPL6244	GSE83586	GSM2212997	Bladder cancer	Bladder cancer	High grade(G3/4)	High grade-Low grade
BC_S1	GPL6244	GSE83586	GSM2212998	Bladder cancer	Bladder cancer	High grade(G3/4)	High grade-Low grade
BC_S1	GPL6244	GSE83586	GSM2212999	Bladder cancer	Bladder cancer	High grade(G3/4)	High grade-Low grade
BC_S1	GPL6244	GSE83586	GSM2213000	Bladder cancer	Bladder cancer	High grade(G3/4)	High grade-Low grade
BC_S1	GPL6244	GSE83586	GSM2213001	Bladder cancer	Bladder cancer	Low grade(G1/2)	High grade-Low grade
BC_S1	GPL6244	GSE83586	GSM2213002	Bladder cancer	Bladder cancer	High grade(G3/4)	High grade-Low grade
BC_S1	GPL6244	GSE83586	GSM2213003	Bladder cancer	Bladder cancer	High grade(G3/4)	High grade-Low grade
BC_S1	GPL6244	GSE83586	GSM2213004	Bladder cancer	Bladder cancer	High grade(G3/4)	High grade-Low grade
BC_S1	GPL6244	GSE83586	GSM2213005	Bladder cancer	Bladder cancer	High grade(G3/4)	High grade-Low grade
BC_S1	GPL6244	GSE83586	GSM2213006	Bladder cancer	Bladder cancer	High grade(G3/4)	High grade-Low grade
BC_S1	GPL6244	GSE83586	GSM2213007	Bladder cancer	Bladder cancer	Low grade(G1/2)	High grade-Low grade
BC_S1	GPL6244	GSE83586	GSM2213008	Bladder cancer	Bladder cancer	High grade(G3/4)	High grade-Low grade
BC_S1	GPL6244	GSE83586	GSM2213009	Bladder cancer	Bladder cancer	High grade(G3/4)	High grade-Low grade
BC_S1	GPL6244	GSE83586	GSM2213010	Bladder cancer	Bladder cancer	High grade(G3/4)	High grade-Low grade
BC_S1	GPL6244	GSE83586	GSM2213011	Bladder cancer	Bladder cancer	High grade(G3/4)	High grade-Low grade
BC_S1	GPL6244	GSE83586	GSM2213012	Bladder cancer	Bladder cancer	High grade(G3/4)	High grade-Low grade
BC_S1	GPL6244	GSE83586	GSM2213013	Bladder cancer	Bladder cancer	High grade(G3/4)	High grade-Low grade
BC_S1	GPL6244	GSE83586	GSM2213014	Bladder cancer	Bladder cancer	High grade(G3/4)	High grade-Low grade
BC_S1	GPL6244	GSE83586	GSM2213015	Bladder cancer	Bladder cancer	High grade(G3/4)	High grade-Low grade
BC_S1	GPL6244	GSE83586	GSM2213016	Bladder cancer	Bladder cancer	High grade(G3/4)	High grade-Low grade
BC_S1	GPL6244	GSE83586	GSM2213017	Bladder cancer	Bladder cancer	High grade(G3/4)	High grade-Low grade
BC_S1	GPL6244	GSE83586	GSM2213018	Bladder cancer	Bladder cancer	High grade(G3/4)	High grade-Low grade
BC_S1	GPL6244	GSE83586	GSM2213020	Bladder cancer	Bladder cancer	High grade(G3/4)	High grade-Low grade
BC_S1	GPL6244	GSE83586	GSM2213021	Bladder cancer	Bladder cancer	Low grade(G1/2)	High grade-Low grade
BC_S1	GPL6244	GSE83586	GSM2213022	Bladder cancer	Bladder cancer	High grade(G3/4)	High grade-Low grade
BC_S1	GPL6244	GSE83586	GSM2213023	Bladder cancer	Bladder cancer	High grade(G3/4)	High grade-Low grade
BC_S1	GPL6244	GSE83586	GSM2213024	Bladder cancer	Bladder cancer	High grade(G3/4)	High grade-Low grade
BC_S1	GPL6244	GSE83586	GSM2213025	Bladder cancer	Bladder cancer	High grade(G3/4)	High grade-Low grade
BC_S1	GPL6244	GSE83586	GSM2213026	Bladder cancer	Bladder cancer	High grade(G3/4)	High grade-Low grade
BC_S1	GPL6244	GSE83586	GSM2213027	Bladder cancer	Bladder cancer	High grade(G3/4)	High grade-Low grade
BC_S1	GPL6244	GSE83586	GSM2213028	Bladder cancer	Bladder cancer	High grade(G3/4)	High grade-Low grade
BC_S1	GPL6244	GSE83586	GSM2213029	Bladder cancer	Bladder cancer	High grade(G3/4)	High grade-Low grade
BC_S1	GPL6244	GSE83586	GSM2213031	Bladder cancer	Bladder cancer	High grade(G3/4)	High grade-Low grade
BC_S1	GPL6244	GSE83586	GSM2213032	Bladder cancer	Bladder cancer	High grade(G3/4)	High grade-Low grade
BC_S1	GPL6244	GSE83586	GSM2213033	Bladder cancer	Bladder cancer	High grade(G3/4)	High grade-Low grade
BC_S1	GPL6244	GSE83586	GSM2213034	Bladder cancer	Bladder cancer	High grade(G3/4)	High grade-Low grade
BC_S1	GPL6244	GSE83586	GSM2213035	Bladder cancer	Bladder cancer	High grade(G3/4)	High grade-Low grade
BC_S1	GPL6244	GSE83586	GSM2213036	Bladder cancer	Bladder cancer	High grade(G3/4)	High grade-Low grade
BC_S1	GPL6244	GSE83586	GSM2213037	Bladder cancer	Bladder cancer	Low grade(G1/2)	High grade-Low grade
BC_S1	GPL6244	GSE83586	GSM2213038	Bladder cancer	Bladder cancer	Low grade(G1/2)	High grade-Low grade
BC_S1	GPL6244	GSE83586	GSM2213039	Bladder cancer	Bladder cancer	High grade(G3/4)	High grade-Low grade
BC_S1	GPL6244	GSE83586	GSM2213040	Bladder cancer	Bladder cancer	High grade(G3/4)	High grade-Low grade
BC_S1	GPL6244	GSE83586	GSM2213041	Bladder cancer	Bladder cancer	High grade(G3/4)	High grade-Low grade
BC_S1	GPL6244	GSE83586	GSM2213042	Bladder cancer	Bladder cancer	High grade(G3/4)	High grade-Low grade
BC_S1	GPL6244	GSE83586	GSM2213043	Bladder cancer	Bladder cancer	High grade(G3/4)	High grade-Low grade
BC_S1	GPL6244	GSE83586	GSM2213044	Bladder cancer	Bladder cancer	Low grade(G1/2)	High grade-Low grade
BC_S1	GPL6244	GSE83586	GSM2213045	Bladder cancer	Bladder cancer	High grade(G3/4)	High grade-Low grade
BC_S1	GPL6244	GSE83586	GSM2213046	Bladder cancer	Bladder cancer	High grade(G3/4)	High grade-Low grade
BC_S1	GPL6244	GSE83586	GSM2213047	Bladder cancer	Bladder cancer	High grade(G3/4)	High grade-Low grade
BC_S1	GPL6244	GSE83586	GSM2213048	Bladder cancer	Bladder cancer	High grade(G3/4)	High grade-Low grade
BC_S1	GPL6244	GSE83586	GSM2213049	Bladder cancer	Bladder cancer	High grade(G3/4)	High grade-Low grade
BC_S1	GPL6244	GSE83586	GSM2213050	Bladder cancer	Bladder cancer	Low grade(G1/2)	High grade-Low grade
BC_S1	GPL6244	GSE83586	GSM2213051	Bladder cancer	Bladder cancer	High grade(G3/4)	High grade-Low grade
BC_S1	GPL6244	GSE83586	GSM2213052	Bladder cancer	Bladder cancer	High grade(G3/4)	High grade-Low grade
BC_S1	GPL6244	GSE83586	GSM2213053	Bladder cancer	Bladder cancer	High grade(G3/4)	High grade-Low grade
BC_S1	GPL6244	GSE83586	GSM2213054	Bladder cancer	Bladder cancer	High grade(G3/4)	High grade-Low grade
BC_S1	GPL6244	GSE83586	GSM2213055	Bladder cancer	Bladder cancer	High grade(G3/4)	High grade-Low grade
BC_S1	GPL6244	GSE83586	GSM2213056	Bladder cancer	Bladder cancer	High grade(G3/4)	High grade-Low grade
BC_S1	GPL6244	GSE83586	GSM2213057	Bladder cancer	Bladder cancer	High grade(G3/4)	High grade-Low grade
BC_S1	GPL6244	GSE83586	GSM2213058	Bladder cancer	Bladder cancer	High grade(G3/4)	High grade-Low grade
BC_S1	GPL6244	GSE83586	GSM2213060	Bladder cancer	Bladder cancer	High grade(G3/4)	High grade-Low grade
BC_S1	GPL6244	GSE83586	GSM2213061	Bladder cancer	Bladder cancer	High grade(G3/4)	High grade-Low grade
BC_S1	GPL6244	GSE83586	GSM2213062	Bladder cancer	Bladder cancer	High grade(G3/4)	High grade-Low grade
BC_S1	GPL6244	GSE83586	GSM2213063	Bladder cancer	Bladder cancer	High grade(G3/4)	High grade-Low grade
BC_S1	GPL6244	GSE83586	GSM2213064	Bladder cancer	Bladder cancer	High grade(G3/4)	High grade-Low grade
BC_S1	GPL6244	GSE83586	GSM2213065	Bladder cancer	Bladder cancer	High grade(G3/4)	High grade-Low grade
BC_S1	GPL6244	GSE83586	GSM2213067	Bladder cancer	Bladder cancer	Low grade(G1/2)	High grade-Low grade
BC_S1	GPL6244	GSE83586	GSM2213068	Bladder cancer	Bladder cancer	High grade(G3/4)	High grade-Low grade
BC_S1	GPL6244	GSE83586	GSM2213069	Bladder cancer	Bladder cancer	Low grade(G1/2)	High grade-Low grade
BC_S1	GPL6244	GSE83586	GSM2213070	Bladder cancer	Bladder cancer	High grade(G3/4)	High grade-Low grade
BC_S1	GPL6244	GSE83586	GSM2213071	Bladder cancer	Bladder cancer	High grade(G3/4)	High grade-Low grade
BC_S1	GPL6244	GSE83586	GSM2213072	Bladder cancer	Bladder cancer	High grade(G3/4)	High grade-Low grade
BC_S1	GPL6244	GSE83586	GSM2213073	Bladder cancer	Bladder cancer	High grade(G3/4)	High grade-Low grade
BC_S1	GPL6244	GSE83586	GSM2213074	Bladder cancer	Bladder cancer	High grade(G3/4)	High grade-Low grade
BC_S1	GPL6244	GSE83586	GSM2213075	Bladder cancer	Bladder cancer	High grade(G3/4)	High grade-Low grade
BC_S1	GPL6244	GSE83586	GSM2213076	Bladder cancer	Bladder cancer	High grade(G3/4)	High grade-Low grade
BC_S1	GPL6244	GSE83586	GSM2213078	Bladder cancer	Bladder cancer	Low grade(G1/2)	High grade-Low grade
BC_S1	GPL6244	GSE83586	GSM2213080	Bladder cancer	Bladder cancer	High grade(G3/4)	High grade-Low grade
BC_S1	GPL6244	GSE83586	GSM2213081	Bladder cancer	Bladder cancer	High grade(G3/4)	High grade-Low grade
BC_S1	GPL6244	GSE83586	GSM2213082	Bladder cancer	Bladder cancer	High grade(G3/4)	High grade-Low grade
BC_S1	GPL6244	GSE83586	GSM2213084	Bladder cancer	Bladder cancer	High grade(G3/4)	High grade-Low grade
BC_S1	GPL6244	GSE83586	GSM2213086	Bladder cancer	Bladder cancer	High grade(G3/4)	High grade-Low grade
BC_S1	GPL6244	GSE83586	GSM2213088	Bladder cancer	Bladder cancer	High grade(G3/4)	High grade-Low grade
BC_S1	GPL6244	GSE83586	GSM2213090	Bladder cancer	Bladder cancer	High grade(G3/4)	High grade-Low grade
BC_S1	GPL6244	GSE83586	GSM2213092	Bladder cancer	Bladder cancer	High grade(G3/4)	High grade-Low grade
BC_S1	GPL6244	GSE83586	GSM2213093	Bladder cancer	Bladder cancer	High grade(G3/4)	High grade-Low grade
BC_S1	GPL6244	GSE83586	GSM2213094	Bladder cancer	Bladder cancer	High grade(G3/4)	High grade-Low grade
BC_S1	GPL6244	GSE83586	GSM2213095	Bladder cancer	Bladder cancer	High grade(G3/4)	High grade-Low grade
BC_S1	GPL6244	GSE83586	GSM2213096	Bladder cancer	Bladder cancer	High grade(G3/4)	High grade-Low grade
BC_S1	GPL6244	GSE83586	GSM2213097	Bladder cancer	Bladder cancer	High grade(G3/4)	High grade-Low grade
BC_S1	GPL6244	GSE83586	GSM2213098	Bladder cancer	Bladder cancer	High grade(G3/4)	High grade-Low grade
BC_S1	GPL6244	GSE83586	GSM2213099	Bladder cancer	Bladder cancer	High grade(G3/4)	High grade-Low grade
BC_S1	GPL6244	GSE83586	GSM2213100	Bladder cancer	Bladder cancer	High grade(G3/4)	High grade-Low grade
BC_S1	GPL6244	GSE83586	GSM2213101	Bladder cancer	Bladder cancer	High grade(G3/4)	High grade-Low grade
BC_S1	GPL6244	GSE83586	GSM2213102	Bladder cancer	Bladder cancer	High grade(G3/4)	High grade-Low grade
BC_S1	GPL6244	GSE83586	GSM2213103	Bladder cancer	Bladder cancer	High grade(G3/4)	High grade-Low grade
BC_S1	GPL6244	GSE83586	GSM2213104	Bladder cancer	Bladder cancer	High grade(G3/4)	High grade-Low grade
BC_S1	GPL6244	GSE83586	GSM2213105	Bladder cancer	Bladder cancer	High grade(G3/4)	High grade-Low grade
BC_S1	GPL6244	GSE83586	GSM2213107	Bladder cancer	Bladder cancer	High grade(G3/4)	High grade-Low grade
BC_S1	GPL6244	GSE83586	GSM2213108	Bladder cancer	Bladder cancer	Low grade(G1/2)	High grade-Low grade
BC_S1	GPL6244	GSE83586	GSM2213109	Bladder cancer	Bladder cancer	High grade(G3/4)	High grade-Low grade
BC_S1	GPL6244	GSE83586	GSM2213110	Bladder cancer	Bladder cancer	High grade(G3/4)	High grade-Low grade
BC_S1	GPL6244	GSE83586	GSM2213111	Bladder cancer	Bladder cancer	High grade(G3/4)	High grade-Low grade
BC_S1	GPL6244	GSE83586	GSM2213112	Bladder cancer	Bladder cancer	High grade(G3/4)	High grade-Low grade
BC_S1	GPL6244	GSE83586	GSM2213113	Bladder cancer	Bladder cancer	Low grade(G1/2)	High grade-Low grade
BC_S1	GPL6244	GSE83586	GSM2213114	Bladder cancer	Bladder cancer	High grade(G3/4)	High grade-Low grade
BC_S1	GPL6244	GSE83586	GSM2213115	Bladder cancer	Bladder cancer	High grade(G3/4)	High grade-Low grade
BC_S1	GPL6244	GSE83586	GSM2213116	Bladder cancer	Bladder cancer	High grade(G3/4)	High grade-Low grade
BC_S1	GPL6244	GSE83586	GSM2213117	Bladder cancer	Bladder cancer	High grade(G3/4)	High grade-Low grade
BC_S1	GPL6244	GSE83586	GSM2213118	Bladder cancer	Bladder cancer	High grade(G3/4)	High grade-Low grade
BC_S1	GPL6244	GSE83586	GSM2213119	Bladder cancer	Bladder cancer	High grade(G3/4)	High grade-Low grade
BC_S1	GPL6244	GSE83586	GSM2213120	Bladder cancer	Bladder cancer	High grade(G3/4)	High grade-Low grade
BC_S1	GPL6244	GSE83586	GSM2213121	Bladder cancer	Bladder cancer	High grade(G3/4)	High grade-Low grade
BC_S1	GPL6244	GSE83586	GSM2213122	Bladder cancer	Bladder cancer	High grade(G3/4)	High grade-Low grade
BC_S1	GPL6244	GSE83586	GSM2213123	Bladder cancer	Bladder cancer	High grade(G3/4)	High grade-Low grade
BC_S1	GPL6244	GSE83586	GSM2213124	Bladder cancer	Bladder cancer	High grade(G3/4)	High grade-Low grade
BC_S1	GPL6244	GSE83586	GSM2213125	Bladder cancer	Bladder cancer	High grade(G3/4)	High grade-Low grade
BC_S1	GPL6244	GSE83586	GSM2213126	Bladder cancer	Bladder cancer	High grade(G3/4)	High grade-Low grade
BC_S1	GPL6244	GSE83586	GSM2213127	Bladder cancer	Bladder cancer	High grade(G3/4)	High grade-Low grade
BC_S1	GPL6244	GSE83586	GSM2213128	Bladder cancer	Bladder cancer	High grade(G3/4)	High grade-Low grade
BC_S1	GPL6244	GSE83586	GSM2213129	Bladder cancer	Bladder cancer	High grade(G3/4)	High grade-Low grade
BC_S1	GPL6244	GSE83586	GSM2213130	Bladder cancer	Bladder cancer	High grade(G3/4)	High grade-Low grade
BC_S1	GPL6244	GSE83586	GSM2213131	Bladder cancer	Bladder cancer	High grade(G3/4)	High grade-Low grade
BC_S1	GPL6244	GSE83586	GSM2213132	Bladder cancer	Bladder cancer	High grade(G3/4)	High grade-Low grade
BC_S1	GPL6244	GSE83586	GSM2213133	Bladder cancer	Bladder cancer	High grade(G3/4)	High grade-Low grade
BC_S1	GPL6244	GSE83586	GSM2213135	Bladder cancer	Bladder cancer	High grade(G3/4)	High grade-Low grade
BC_S1	GPL6244	GSE83586	GSM2213136	Bladder cancer	Bladder cancer	High grade(G3/4)	High grade-Low grade
BC_S1	GPL6244	GSE83586	GSM2213137	Bladder cancer	Bladder cancer	High grade(G3/4)	High grade-Low grade
BC_S1	GPL6244	GSE83586	GSM2213138	Bladder cancer	Bladder cancer	Low grade(G1/2)	High grade-Low grade
BC_S1	GPL6244	GSE83586	GSM2213139	Bladder cancer	Bladder cancer	High grade(G3/4)	High grade-Low grade
BC_S1	GPL6244	GSE83586	GSM2213140	Bladder cancer	Bladder cancer	High grade(G3/4)	High grade-Low grade
BC_S1	GPL6244	GSE83586	GSM2213141	Bladder cancer	Bladder cancer	High grade(G3/4)	High grade-Low grade
BC_S1	GPL6244	GSE83586	GSM2213142	Bladder cancer	Bladder cancer	High grade(G3/4)	High grade-Low grade
BC_S1	GPL6244	GSE83586	GSM2213143	Bladder cancer	Bladder cancer	High grade(G3/4)	High grade-Low grade
BC_S1	GPL6244	GSE83586	GSM2213144	Bladder cancer	Bladder cancer	High grade(G3/4)	High grade-Low grade
BC_S1	GPL6244	GSE83586	GSM2213145	Bladder cancer	Bladder cancer	High grade(G3/4)	High grade-Low grade
BC_S1	GPL6244	GSE83586	GSM2213146	Bladder cancer	Bladder cancer	High grade(G3/4)	High grade-Low grade
BC_S1	GPL6244	GSE83586	GSM2213147	Bladder cancer	Bladder cancer	High grade(G3/4)	High grade-Low grade
BC_S1	GPL6244	GSE83586	GSM2213148	Bladder cancer	Bladder cancer	High grade(G3/4)	High grade-Low grade
BC_S1	GPL6244	GSE83586	GSM2213149	Bladder cancer	Bladder cancer	High grade(G3/4)	High grade-Low grade
BC_S1	GPL6244	GSE83586	GSM2213150	Bladder cancer	Bladder cancer	High grade(G3/4)	High grade-Low grade
BC_S1	GPL6244	GSE83586	GSM2213151	Bladder cancer	Bladder cancer	High grade(G3/4)	High grade-Low grade
BC_S1	GPL6244	GSE83586	GSM2213152	Bladder cancer	Bladder cancer	High grade(G3/4)	High grade-Low grade
BC_S1	GPL6244	GSE83586	GSM2213153	Bladder cancer	Bladder cancer	High grade(G3/4)	High grade-Low grade
BC_S1	GPL6244	GSE83586	GSM2213154	Bladder cancer	Bladder cancer	High grade(G3/4)	High grade-Low grade
BC_S1	GPL6244	GSE83586	GSM2213155	Bladder cancer	Bladder cancer	High grade(G3/4)	High grade-Low grade
BC_S1	GPL6244	GSE83586	GSM2213156	Bladder cancer	Bladder cancer	Low grade(G1/2)	High grade-Low grade
BC_S1	GPL6244	GSE83586	GSM2213158	Bladder cancer	Bladder cancer	High grade(G3/4)	High grade-Low grade
BC_S1	GPL6244	GSE83586	GSM2213159	Bladder cancer	Bladder cancer	High grade(G3/4)	High grade-Low grade
BC_S1	GPL6244	GSE83586	GSM2213160	Bladder cancer	Bladder cancer	Low grade(G1/2)	High grade-Low grade
BC_S1	GPL6244	GSE83586	GSM2213161	Bladder cancer	Bladder cancer	High grade(G3/4)	High grade-Low grade
BC_S1	GPL6244	GSE83586	GSM2213162	Bladder cancer	Bladder cancer	High grade(G3/4)	High grade-Low grade
BC_S1	GPL6244	GSE83586	GSM2213163	Bladder cancer	Bladder cancer	Low grade(G1/2)	High grade-Low grade
BC_S1	GPL6244	GSE83586	GSM2213164	Bladder cancer	Bladder cancer	High grade(G3/4)	High grade-Low grade
BC_S1	GPL6244	GSE83586	GSM2213165	Bladder cancer	Bladder cancer	Low grade(G1/2)	High grade-Low grade
BC_S1	GPL6244	GSE83586	GSM2213166	Bladder cancer	Bladder cancer	High grade(G3/4)	High grade-Low grade
BC_S1	GPL6244	GSE83586	GSM2213167	Bladder cancer	Bladder cancer	High grade(G3/4)	High grade-Low grade
BC_S1	GPL6244	GSE83586	GSM2213168	Bladder cancer	Bladder cancer	High grade(G3/4)	High grade-Low grade
BC_S1	GPL6244	GSE83586	GSM2213169	Bladder cancer	Bladder cancer	High grade(G3/4)	High grade-Low grade
BC_S1	GPL6244	GSE83586	GSM2213170	Bladder cancer	Bladder cancer	High grade(G3/4)	High grade-Low grade
BC_S1	GPL6244	GSE83586	GSM2213171	Bladder cancer	Bladder cancer	High grade(G3/4)	High grade-Low grade
BC_S1	GPL6244	GSE83586	GSM2213172	Bladder cancer	Bladder cancer	Low grade(G1/2)	High grade-Low grade
BC_S1	GPL6244	GSE83586	GSM2213173	Bladder cancer	Bladder cancer	High grade(G3/4)	High grade-Low grade
BC_S1	GPL6244	GSE83586	GSM2213174	Bladder cancer	Bladder cancer	High grade(G3/4)	High grade-Low grade
BC_S1	GPL6244	GSE83586	GSM2213175	Bladder cancer	Bladder cancer	High grade(G3/4)	High grade-Low grade
BC_S1	GPL6244	GSE83586	GSM2213176	Bladder cancer	Bladder cancer	High grade(G3/4)	High grade-Low grade
BC_S1	GPL6244	GSE83586	GSM2213177	Bladder cancer	Bladder cancer	High grade(G3/4)	High grade-Low grade
BC_S1	GPL6244	GSE83586	GSM2213178	Bladder cancer	Bladder cancer	High grade(G3/4)	High grade-Low grade
BC_S1	GPL6244	GSE83586	GSM2213179	Bladder cancer	Bladder cancer	Low grade(G1/2)	High grade-Low grade
BC_S1	GPL6244	GSE83586	GSM2213180	Bladder cancer	Bladder cancer	High grade(G3/4)	High grade-Low grade
BC_S1	GPL6244	GSE83586	GSM2213181	Bladder cancer	Bladder cancer	High grade(G3/4)	High grade-Low grade
BC_S1	GPL6244	GSE83586	GSM2213182	Bladder cancer	Bladder cancer	High grade(G3/4)	High grade-Low grade
BC_S1	GPL6244	GSE83586	GSM2213183	Bladder cancer	Bladder cancer	High grade(G3/4)	High grade-Low grade
BC_S1	GPL6244	GSE83586	GSM2213184	Bladder cancer	Bladder cancer	High grade(G3/4)	High grade-Low grade
BC_S1	GPL6244	GSE83586	GSM2213185	Bladder cancer	Bladder cancer	High grade(G3/4)	High grade-Low grade
BC_S1	GPL6244	GSE83586	GSM2213186	Bladder cancer	Bladder cancer	High grade(G3/4)	High grade-Low grade
BC_S1	GPL6244	GSE83586	GSM2213187	Bladder cancer	Bladder cancer	High grade(G3/4)	High grade-Low grade
BC_S1	GPL6244	GSE83586	GSM2213188	Bladder cancer	Bladder cancer	High grade(G3/4)	High grade-Low grade
BC_S1	GPL6244	GSE83586	GSM2213189	Bladder cancer	Bladder cancer	High grade(G3/4)	High grade-Low grade
BC_S1	GPL6244	GSE83586	GSM2213190	Bladder cancer	Bladder cancer	High grade(G3/4)	High grade-Low grade
BC_S1	GPL6244	GSE83586	GSM2213191	Bladder cancer	Bladder cancer	High grade(G3/4)	High grade-Low grade
BC_S1	GPL6244	GSE83586	GSM2213192	Bladder cancer	Bladder cancer	High grade(G3/4)	High grade-Low grade
BC_S1	GPL6244	GSE83586	GSM2213193	Bladder cancer	Bladder cancer	High grade(G3/4)	High grade-Low grade
BC_S1	GPL6244	GSE83586	GSM2213194	Bladder cancer	Bladder cancer	High grade(G3/4)	High grade-Low grade
BC_S1	GPL6244	GSE83586	GSM2213195	Bladder cancer	Bladder cancer	High grade(G3/4)	High grade-Low grade
BC_S1	GPL6244	GSE83586	GSM2213196	Bladder cancer	Bladder cancer	High grade(G3/4)	High grade-Low grade
BC_S1	GPL6244	GSE83586	GSM2213197	Bladder cancer	Bladder cancer	High grade(G3/4)	High grade-Low grade
BC_S1	GPL6244	GSE83586	GSM2213198	Bladder cancer	Bladder cancer	High grade(G3/4)	High grade-Low grade
BC_S1	GPL6244	GSE83586	GSM2213199	Bladder cancer	Bladder cancer	High grade(G3/4)	High grade-Low grade
BC_S1	GPL6244	GSE83586	GSM2213200	Bladder cancer	Bladder cancer	High grade(G3/4)	High grade-Low grade
BC_S1	GPL6244	GSE83586	GSM2213201	Bladder cancer	Bladder cancer	High grade(G3/4)	High grade-Low grade
BC_S1	GPL6244	GSE83586	GSM2213202	Bladder cancer	Bladder cancer	High grade(G3/4)	High grade-Low grade
BC_S1	GPL6244	GSE83586	GSM2213203	Bladder cancer	Bladder cancer	High grade(G3/4)	High grade-Low grade
BC_S1	GPL6244	GSE83586	GSM2213205	Bladder cancer	Bladder cancer	High grade(G3/4)	High grade-Low grade
BC_S1	GPL6244	GSE83586	GSM2213206	Bladder cancer	Bladder cancer	High grade(G3/4)	High grade-Low grade
BC_S1	GPL6244	GSE83586	GSM2213207	Bladder cancer	Bladder cancer	High grade(G3/4)	High grade-Low grade
BC_S1	GPL6244	GSE83586	GSM2213208	Bladder cancer	Bladder cancer	High grade(G3/4)	High grade-Low grade
BC_S1	GPL6244	GSE83586	GSM2213209	Bladder cancer	Bladder cancer	High grade(G3/4)	High grade-Low grade
BC_S1	GPL6244	GSE83586	GSM2213210	Bladder cancer	Bladder cancer	High grade(G3/4)	High grade-Low grade
BC_S1	GPL6244	GSE83586	GSM2213211	Bladder cancer	Bladder cancer	High grade(G3/4)	High grade-Low grade
BC_S1	GPL6244	GSE83586	GSM2213212	Bladder cancer	Bladder cancer	Low grade(G1/2)	High grade-Low grade
BC_S1	GPL6244	GSE83586	GSM2213213	Bladder cancer	Bladder cancer	High grade(G3/4)	High grade-Low grade
BC_S2	GPL17586	GSE76211	GSM1976573	Bladder cancer	Bladder cancer	Tumor	Tumor-Normal
BC_S2	GPL17586	GSE76211	GSM1976574	Bladder cancer	Bladder cancer	Tumor	Tumor-Normal
BC_S2	GPL17586	GSE76211	GSM1976575	Bladder cancer	Bladder cancer	Tumor	Tumor-Normal
BC_S2	GPL17586	GSE76211	GSM1976577	Bladder cancer	Bladder cancer	Normal	Tumor-Normal
BC_S2	GPL17586	GSE76211	GSM1976579	Bladder cancer	Bladder cancer	Normal	Tumor-Normal
BC_S2	GPL17586	GSE76211	GSM1976580	Bladder cancer	Bladder cancer	Normal	Tumor-Normal
BC_S4	GPL16956	GSE89006	GSM2357046	Bladder cancer	Bladder cancer	Tumor	Tumor-Normal
BC_S4	GPL16956	GSE89006	GSM2357047	Bladder cancer	Bladder cancer	Normal	Tumor-Normal
BC_S4	GPL16956	GSE89006	GSM2357048	Bladder cancer	Bladder cancer	Tumor	Tumor-Normal
BC_S4	GPL16956	GSE89006	GSM2357049	Bladder cancer	Bladder cancer	Normal	Tumor-Normal
BC_S4	GPL16956	GSE89006	GSM2357050	Bladder cancer	Bladder cancer	Tumor	Tumor-Normal
BC_S4	GPL16956	GSE89006	GSM2357051	Bladder cancer	Bladder cancer	Normal	Tumor-Normal
BC_S4	GPL16956	GSE89006	GSM2357052	Bladder cancer	Bladder cancer	Tumor	Tumor-Normal
BC_S4	GPL16956	GSE89006	GSM2357053	Bladder cancer	Bladder cancer	Normal	Tumor-Normal
BC_S8	GPL6244	GSE71576	GSM1838823	Bladder cancer	Bladder cancer	Low grade(G1/2)	High grade-Low grade
BC_S8	GPL6244	GSE71576	GSM1838824	Bladder cancer	Bladder cancer	High grade(G3/4)	High grade-Low grade
BC_S8	GPL6244	GSE71576	GSM1838825	Bladder cancer	Bladder cancer	Low grade(G1/2)	High grade-Low grade
BC_S8	GPL6244	GSE71576	GSM1838826	Bladder cancer	Bladder cancer	Low grade(G1/2)	High grade-Low grade
BC_S8	GPL6244	GSE71576	GSM1838827	Bladder cancer	Bladder cancer	Low grade(G1/2)	High grade-Low grade
BC_S8	GPL6244	GSE71576	GSM1838828	Bladder cancer	Bladder cancer	High grade(G3/4)	High grade-Low grade
BC_S8	GPL6244	GSE71576	GSM1838829	Bladder cancer	Bladder cancer	Low grade(G1/2)	High grade-Low grade
BC_S8	GPL6244	GSE71576	GSM1838830	Bladder cancer	Bladder cancer	Low grade(G1/2)	High grade-Low grade
BC_S8	GPL6244	GSE71576	GSM1838831	Bladder cancer	Bladder cancer	High grade(G3/4)	High grade-Low grade
BC_S8	GPL6244	GSE71576	GSM1838832	Bladder cancer	Bladder cancer	Low grade(G1/2)	High grade-Low grade
BC_S8	GPL6244	GSE71576	GSM1838833	Bladder cancer	Bladder cancer	High grade(G3/4)	High grade-Low grade
BC_S8	GPL6244	GSE71576	GSM1838834	Bladder cancer	Bladder cancer	Low grade(G1/2)	High grade-Low grade
BC_S8	GPL6244	GSE71576	GSM1838835	Bladder cancer	Bladder cancer	Low grade(G1/2)	High grade-Low grade
BC_S8	GPL6244	GSE71576	GSM1838837	Bladder cancer	Bladder cancer	High grade(G3/4)	High grade-Low grade
BC_S8	GPL6244	GSE71576	GSM1838838	Bladder cancer	Bladder cancer	High grade(G3/4)	High grade-Low grade
BC_S8	GPL6244	GSE71576	GSM1838839	Bladder cancer	Bladder cancer	High grade(G3/4)	High grade-Low grade
BC_S8	GPL6244	GSE71576	GSM1838841	Bladder cancer	Bladder cancer	Low grade(G1/2)	High grade-Low grade
BC_S8	GPL6244	GSE71576	GSM1838842	Bladder cancer	Bladder cancer	Low grade(G1/2)	High grade-Low grade
BC_S8	GPL6244	GSE71576	GSM1838843	Bladder cancer	Bladder cancer	Low grade(G1/2)	High grade-Low grade
BC_S8	GPL6244	GSE71576	GSM1838844	Bladder cancer	Bladder cancer	Low grade(G1/2)	High grade-Low grade
BC_S8	GPL6244	GSE71576	GSM1838845	Bladder cancer	Bladder cancer	High grade(G3/4)	High grade-Low grade
BC_S8	GPL6244	GSE71576	GSM1838846	Bladder cancer	Bladder cancer	High grade(G3/4)	High grade-Low grade
BC_S8	GPL6244	GSE71576	GSM1838847	Bladder cancer	Bladder cancer	Low grade(G1/2)	High grade-Low grade
BC_S8	GPL6244	GSE71576	GSM1838848	Bladder cancer	Bladder cancer	Low grade(G1/2)	High grade-Low grade
BC_S8	GPL6244	GSE71576	GSM1838849	Bladder cancer	Bladder cancer	High grade(G3/4)	High grade-Low grade
BC_S8	GPL6244	GSE71576	GSM1838850	Bladder cancer	Bladder cancer	Low grade(G1/2)	High grade-Low grade
BC_S8	GPL6244	GSE71576	GSM1838851	Bladder cancer	Bladder cancer	High grade(G3/4)	High grade-Low grade
BC_S8	GPL6244	GSE71576	GSM1838852	Bladder cancer	Bladder cancer	High grade(G3/4)	High grade-Low grade
BC_S8	GPL6244	GSE71576	GSM1838853	Bladder cancer	Bladder cancer	High grade(G3/4)	High grade-Low grade
BC_S8	GPL6244	GSE71576	GSM1838854	Bladder cancer	Bladder cancer	Low grade(G1/2)	High grade-Low grade
BC_S8	GPL6244	GSE71576	GSM1838855	Bladder cancer	Bladder cancer	High grade(G3/4)	High grade-Low grade
BC_S8	GPL6244	GSE71576	GSM1838856	Bladder cancer	Bladder cancer	Low grade(G1/2)	High grade-Low grade
BC_S8	GPL6244	GSE71576	GSM1838857	Bladder cancer	Bladder cancer	Low grade(G1/2)	High grade-Low grade
BC_S8	GPL6244	GSE71576	GSM1838858	Bladder cancer	Bladder cancer	Low grade(G1/2)	High grade-Low grade
BC_S8	GPL6244	GSE71576	GSM1838859	Bladder cancer	Bladder cancer	Low grade(G1/2)	High grade-Low grade
BC_S8	GPL6244	GSE71576	GSM1838860	Bladder cancer	Bladder cancer	Low grade(G1/2)	High grade-Low grade
BC_S8	GPL6244	GSE71576	GSM1838861	Bladder cancer	Bladder cancer	High grade(G3/4)	High grade-Low grade
BC_S8	GPL6244	GSE71576	GSM1838862	Bladder cancer	Bladder cancer	Low grade(G1/2)	High grade-Low grade
BC_S8	GPL6244	GSE71576	GSM1838863	Bladder cancer	Bladder cancer	Low grade(G1/2)	High grade-Low grade
BC_S8	GPL6244	GSE71576	GSM1838864	Bladder cancer	Bladder cancer	Low grade(G1/2)	High grade-Low grade
BC_S8	GPL6244	GSE71576	GSM1838865	Bladder cancer	Bladder cancer	High grade(G3/4)	High grade-Low grade
BC_S8	GPL6244	GSE71576	GSM1838866	Bladder cancer	Bladder cancer	High grade(G3/4)	High grade-Low grade
BC_S9	GPL14951	GSE65635	GSM1602279	Bladder cancer	Bladder cancer	Normal	Tumor-Normal
BC_S9	GPL14951	GSE65635	GSM1602280	Bladder cancer	Bladder cancer	Normal	Tumor-Normal
BC_S9	GPL14951	GSE65635	GSM1602281	Bladder cancer	Bladder cancer	Normal	Tumor-Normal
BC_S9	GPL14951	GSE65635	GSM1602282	Bladder cancer	Bladder cancer	Normal	Tumor-Normal
BC_S9	GPL14951	GSE65635	GSM1602283	Bladder cancer	Bladder cancer	Tumor	Tumor-Normal
BC_S9	GPL14951	GSE65635	GSM1602284	Bladder cancer	Bladder cancer	Tumor	Tumor-Normal
BC_S9	GPL14951	GSE65635	GSM1602285	Bladder cancer	Bladder cancer	Tumor	Tumor-Normal
BC_S9	GPL14951	GSE65635	GSM1602286	Bladder cancer	Bladder cancer	Tumor	Tumor-Normal
BC_S9	GPL14951	GSE65635	GSM1602287	Bladder cancer	Bladder cancer	Tumor	Tumor-Normal
BC_S9	GPL14951	GSE65635	GSM1602288	Bladder cancer	Bladder cancer	Tumor	Tumor-Normal
BC_S9	GPL14951	GSE65635	GSM1602289	Bladder cancer	Bladder cancer	Tumor	Tumor-Normal
BC_S9	GPL14951	GSE65635	GSM1602290	Bladder cancer	Bladder cancer	Tumor	Tumor-Normal
BC_S13	GPL18348	GSE55433	GSM1336538	Bladder cancer	Urothelial carcinoma	Tumor	Tumor-Normal
BC_S13	GPL18348	GSE55433	GSM1336539	Bladder cancer	Urothelial carcinoma	Tumor	Tumor-Normal
BC_S13	GPL18348	GSE55433	GSM1336540	Bladder cancer	Urothelial carcinoma	Tumor	Tumor-Normal
BC_S13	GPL18348	GSE55433	GSM1336541	Bladder cancer	Urothelial carcinoma	Tumor	Tumor-Normal
BC_S13	GPL18348	GSE55433	GSM1336542	Bladder cancer	Urothelial carcinoma	Tumor	Tumor-Normal
BC_S13	GPL18348	GSE55433	GSM1336543	Bladder cancer	Urothelial carcinoma	Tumor	Tumor-Normal
BC_S13	GPL18348	GSE55433	GSM1336544	Bladder cancer	Urothelial carcinoma	Tumor	Tumor-Normal
BC_S13	GPL18348	GSE55433	GSM1336545	Bladder cancer	Urothelial carcinoma	Tumor	Tumor-Normal
BC_S13	GPL18348	GSE55433	GSM1336546	Bladder cancer	Urothelial carcinoma	Tumor	Tumor-Normal
BC_S13	GPL18348	GSE55433	GSM1336547	Bladder cancer	Urothelial carcinoma	Tumor	Tumor-Normal
BC_S13	GPL18348	GSE55433	GSM1336548	Bladder cancer	Urothelial carcinoma	Tumor	Tumor-Normal
BC_S13	GPL18348	GSE55433	GSM1336549	Bladder cancer	Urothelial carcinoma	Tumor	Tumor-Normal
BC_S13	GPL18348	GSE55433	GSM1336550	Bladder cancer	Urothelial carcinoma	Tumor	Tumor-Normal
BC_S13	GPL18348	GSE55433	GSM1336551	Bladder cancer	Urothelial carcinoma	Tumor	Tumor-Normal
BC_S13	GPL18348	GSE55433	GSM1336552	Bladder cancer	Urothelial carcinoma	Tumor	Tumor-Normal
BC_S13	GPL18348	GSE55433	GSM1336553	Bladder cancer	Urothelial carcinoma	Tumor	Tumor-Normal
BC_S13	GPL18348	GSE55433	GSM1336554	Bladder cancer	Urothelial carcinoma	Tumor	Tumor-Normal
BC_S13	GPL18348	GSE55433	GSM1336555	Bladder cancer	Urothelial carcinoma	Tumor	Tumor-Normal
BC_S13	GPL18348	GSE55433	GSM1336556	Bladder cancer	Urothelial carcinoma	Tumor	Tumor-Normal
BC_S13	GPL18348	GSE55433	GSM1336557	Bladder cancer	Urothelial carcinoma	Tumor	Tumor-Normal
BC_S13	GPL18348	GSE55433	GSM1336558	Bladder cancer	Urothelial carcinoma	Tumor	Tumor-Normal
BC_S13	GPL18348	GSE55433	GSM1336559	Bladder cancer	Urothelial carcinoma	Tumor	Tumor-Normal
BC_S13	GPL18348	GSE55433	GSM1336560	Bladder cancer	Urothelial carcinoma	Tumor	Tumor-Normal
BC_S13	GPL18348	GSE55433	GSM1336561	Bladder cancer	Urothelial carcinoma	Tumor	Tumor-Normal
BC_S13	GPL18348	GSE55433	GSM1336562	Bladder cancer	Urothelial carcinoma	Tumor	Tumor-Normal
BC_S13	GPL18348	GSE55433	GSM1336563	Bladder cancer	Urothelial carcinoma	Tumor	Tumor-Normal
BC_S13	GPL18348	GSE55433	GSM1336564	Bladder cancer	Urothelial carcinoma	Tumor	Tumor-Normal
BC_S13	GPL18348	GSE55433	GSM1336565	Bladder cancer	Urothelial carcinoma	Tumor	Tumor-Normal
BC_S13	GPL18348	GSE55433	GSM1336566	Bladder cancer	Urothelial carcinoma	Tumor	Tumor-Normal
BC_S13	GPL18348	GSE55433	GSM1336567	Bladder cancer	Urothelial carcinoma	Tumor	Tumor-Normal
BC_S13	GPL18348	GSE55433	GSM1336568	Bladder cancer	Urothelial carcinoma	Tumor	Tumor-Normal
BC_S13	GPL18348	GSE55433	GSM1336569	Bladder cancer	Urothelial carcinoma	Tumor	Tumor-Normal
BC_S13	GPL18348	GSE55433	GSM1336570	Bladder cancer	Urothelial carcinoma	Tumor	Tumor-Normal
BC_S13	GPL18348	GSE55433	GSM1336571	Bladder cancer	Urothelial carcinoma	Tumor	Tumor-Normal
BC_S13	GPL18348	GSE55433	GSM1336572	Bladder cancer	Urothelial carcinoma	Tumor	Tumor-Normal
BC_S13	GPL18348	GSE55433	GSM1336573	Bladder cancer	Urothelial carcinoma	Tumor	Tumor-Normal
BC_S13	GPL18348	GSE55433	GSM1336574	Bladder cancer	Urothelial carcinoma	Tumor	Tumor-Normal
BC_S13	GPL18348	GSE55433	GSM1336575	Bladder cancer	Urothelial carcinoma	Tumor	Tumor-Normal
BC_S13	GPL18348	GSE55433	GSM1336576	Bladder cancer	Urothelial carcinoma	Tumor	Tumor-Normal
BC_S13	GPL18348	GSE55433	GSM1336577	Bladder cancer	Urothelial carcinoma	Tumor	Tumor-Normal
BC_S13	GPL18348	GSE55433	GSM1336578	Bladder cancer	Urothelial carcinoma	Tumor	Tumor-Normal
BC_S13	GPL18348	GSE55433	GSM1336579	Bladder cancer	Urothelial carcinoma	Tumor	Tumor-Normal
BC_S13	GPL18348	GSE55433	GSM1336580	Bladder cancer	Urothelial carcinoma	Tumor	Tumor-Normal
BC_S13	GPL18348	GSE55433	GSM1336581	Bladder cancer	Urothelial carcinoma	Tumor	Tumor-Normal
BC_S13	GPL18348	GSE55433	GSM1336582	Bladder cancer	Urothelial carcinoma	Tumor	Tumor-Normal
BC_S13	GPL18348	GSE55433	GSM1336583	Bladder cancer	Urothelial carcinoma	Tumor	Tumor-Normal
BC_S13	GPL18348	GSE55433	GSM1336584	Bladder cancer	Urothelial carcinoma	Tumor	Tumor-Normal
BC_S13	GPL18348	GSE55433	GSM1336585	Bladder cancer	Urothelial carcinoma	Tumor	Tumor-Normal
BC_S13	GPL18348	GSE55433	GSM1336586	Bladder cancer	Urothelial carcinoma	Tumor	Tumor-Normal
BC_S13	GPL18348	GSE55433	GSM1336587	Bladder cancer	Urothelial carcinoma	Tumor	Tumor-Normal
BC_S13	GPL18348	GSE55433	GSM1336588	Bladder cancer	Urothelial carcinoma	Tumor	Tumor-Normal
BC_S13	GPL18348	GSE55433	GSM1336589	Bladder cancer	Urothelial carcinoma	Tumor	Tumor-Normal
BC_S13	GPL18348	GSE55433	GSM1336590	Bladder cancer	Urothelial carcinoma	Tumor	Tumor-Normal
BC_S13	GPL18348	GSE55433	GSM1336591	Bladder cancer	Urothelial carcinoma	Tumor	Tumor-Normal
BC_S13	GPL18348	GSE55433	GSM1336592	Bladder cancer	Urothelial carcinoma	Tumor	Tumor-Normal
BC_S13	GPL18348	GSE55433	GSM1336593	Bladder cancer	Urothelial carcinoma	Tumor	Tumor-Normal
BC_S13	GPL18348	GSE55433	GSM1336594	Bladder cancer	Urothelial carcinoma	Tumor	Tumor-Normal
BC_S13	GPL18348	GSE55433	GSM1336595	Bladder cancer	Urothelial carcinoma	Normal	Tumor-Normal
BC_S13	GPL18348	GSE55433	GSM1336596	Bladder cancer	Urothelial carcinoma	Normal	Tumor-Normal
BC_S13	GPL18348	GSE55433	GSM1336597	Bladder cancer	Urothelial carcinoma	Normal	Tumor-Normal
BC_S13	GPL18348	GSE55433	GSM1336598	Bladder cancer	Urothelial carcinoma	Normal	Tumor-Normal
BC_S13	GPL18348	GSE55433	GSM1336599	Bladder cancer	Urothelial carcinoma	Normal	Tumor-Normal
BC_S13	GPL18348	GSE55433	GSM1336600	Bladder cancer	Urothelial carcinoma	Normal	Tumor-Normal
BC_S13	GPL18348	GSE55433	GSM1336601	Bladder cancer	Urothelial carcinoma	Normal	Tumor-Normal
BC_S13	GPL18348	GSE55433	GSM1336602	Bladder cancer	Urothelial carcinoma	Normal	Tumor-Normal
BC_S13	GPL18348	GSE55433	GSM1336603	Bladder cancer	Urothelial carcinoma	Normal	Tumor-Normal
BC_S13	GPL18348	GSE55433	GSM1336604	Bladder cancer	Urothelial carcinoma	Normal	Tumor-Normal
BC_S13	GPL18348	GSE55433	GSM1336605	Bladder cancer	Urothelial carcinoma	Normal	Tumor-Normal
BC_S13	GPL18348	GSE55433	GSM1336606	Bladder cancer	Urothelial carcinoma	Normal	Tumor-Normal
BC_S13	GPL18348	GSE55433	GSM1336607	Bladder cancer	Urothelial carcinoma	Normal	Tumor-Normal
BC_S13	GPL18348	GSE55433	GSM1336609	Bladder cancer	Urothelial carcinoma	Normal	Tumor-Normal
BC_S13	GPL18348	GSE55433	GSM1336610	Bladder cancer	Urothelial carcinoma	Normal	Tumor-Normal
BC_S13	GPL18348	GSE55433	GSM1336611	Bladder cancer	Urothelial carcinoma	Normal	Tumor-Normal
BC_S13	GPL18348	GSE55433	GSM1336612	Bladder cancer	Urothelial carcinoma	Normal	Tumor-Normal
BC_S13	GPL18348	GSE55433	GSM1336614	Bladder cancer	Urothelial carcinoma	Normal	Tumor-Normal
BC_S13	GPL18348	GSE55433	GSM1336615	Bladder cancer	Urothelial carcinoma	Normal	Tumor-Normal
BC_S13	GPL18348	GSE55433	GSM1336616	Bladder cancer	Urothelial carcinoma	Normal	Tumor-Normal
BC_S13	GPL18348	GSE55433	GSM1336617	Bladder cancer	Urothelial carcinoma	Normal	Tumor-Normal
BC_S13	GPL18348	GSE55433	GSM1336618	Bladder cancer	Urothelial carcinoma	Normal	Tumor-Normal
BC_S13	GPL18348	GSE55433	GSM1336619	Bladder cancer	Urothelial carcinoma	Normal	Tumor-Normal
BC_S13	GPL18348	GSE55433	GSM1336620	Bladder cancer	Urothelial carcinoma	Normal	Tumor-Normal
BC_S14	GPL18348	GSE55433	GSM1336538	Bladder cancer	Urothelial carcinoma	Low grade	High grade-Low grade
BC_S14	GPL18348	GSE55433	GSM1336539	Bladder cancer	Urothelial carcinoma	Low grade	High grade-Low grade
BC_S14	GPL18348	GSE55433	GSM1336540	Bladder cancer	Urothelial carcinoma	Low grade	High grade-Low grade
BC_S14	GPL18348	GSE55433	GSM1336541	Bladder cancer	Urothelial carcinoma	Low grade	High grade-Low grade
BC_S14	GPL18348	GSE55433	GSM1336542	Bladder cancer	Urothelial carcinoma	Low grade	High grade-Low grade
BC_S14	GPL18348	GSE55433	GSM1336543	Bladder cancer	Urothelial carcinoma	Low grade	High grade-Low grade
BC_S14	GPL18348	GSE55433	GSM1336544	Bladder cancer	Urothelial carcinoma	Low grade	High grade-Low grade
BC_S14	GPL18348	GSE55433	GSM1336545	Bladder cancer	Urothelial carcinoma	Low grade	High grade-Low grade
BC_S14	GPL18348	GSE55433	GSM1336546	Bladder cancer	Urothelial carcinoma	Low grade	High grade-Low grade
BC_S14	GPL18348	GSE55433	GSM1336547	Bladder cancer	Urothelial carcinoma	Low grade	High grade-Low grade
BC_S14	GPL18348	GSE55433	GSM1336548	Bladder cancer	Urothelial carcinoma	Low grade	High grade-Low grade
BC_S14	GPL18348	GSE55433	GSM1336549	Bladder cancer	Urothelial carcinoma	Low grade	High grade-Low grade
BC_S14	GPL18348	GSE55433	GSM1336550	Bladder cancer	Urothelial carcinoma	Low grade	High grade-Low grade
BC_S14	GPL18348	GSE55433	GSM1336551	Bladder cancer	Urothelial carcinoma	Low grade	High grade-Low grade
BC_S14	GPL18348	GSE55433	GSM1336552	Bladder cancer	Urothelial carcinoma	Low grade	High grade-Low grade
BC_S14	GPL18348	GSE55433	GSM1336553	Bladder cancer	Urothelial carcinoma	Low grade	High grade-Low grade
BC_S14	GPL18348	GSE55433	GSM1336554	Bladder cancer	Urothelial carcinoma	Low grade	High grade-Low grade
BC_S14	GPL18348	GSE55433	GSM1336555	Bladder cancer	Urothelial carcinoma	Low grade	High grade-Low grade
BC_S14	GPL18348	GSE55433	GSM1336556	Bladder cancer	Urothelial carcinoma	Low grade	High grade-Low grade
BC_S14	GPL18348	GSE55433	GSM1336557	Bladder cancer	Urothelial carcinoma	Low grade	High grade-Low grade
BC_S14	GPL18348	GSE55433	GSM1336558	Bladder cancer	Urothelial carcinoma	Low grade	High grade-Low grade
BC_S14	GPL18348	GSE55433	GSM1336559	Bladder cancer	Urothelial carcinoma	Low grade	High grade-Low grade
BC_S14	GPL18348	GSE55433	GSM1336560	Bladder cancer	Urothelial carcinoma	Low grade	High grade-Low grade
BC_S14	GPL18348	GSE55433	GSM1336561	Bladder cancer	Urothelial carcinoma	High grade	High grade-Low grade
BC_S14	GPL18348	GSE55433	GSM1336562	Bladder cancer	Urothelial carcinoma	High grade	High grade-Low grade
BC_S14	GPL18348	GSE55433	GSM1336563	Bladder cancer	Urothelial carcinoma	High grade	High grade-Low grade
BC_S14	GPL18348	GSE55433	GSM1336564	Bladder cancer	Urothelial carcinoma	High grade	High grade-Low grade
BC_S14	GPL18348	GSE55433	GSM1336565	Bladder cancer	Urothelial carcinoma	High grade	High grade-Low grade
BC_S14	GPL18348	GSE55433	GSM1336566	Bladder cancer	Urothelial carcinoma	High grade	High grade-Low grade
BC_S14	GPL18348	GSE55433	GSM1336567	Bladder cancer	Urothelial carcinoma	High grade	High grade-Low grade
BC_S14	GPL18348	GSE55433	GSM1336568	Bladder cancer	Urothelial carcinoma	High grade	High grade-Low grade
BC_S14	GPL18348	GSE55433	GSM1336569	Bladder cancer	Urothelial carcinoma	High grade	High grade-Low grade
BC_S14	GPL18348	GSE55433	GSM1336570	Bladder cancer	Urothelial carcinoma	High grade	High grade-Low grade
BC_S14	GPL18348	GSE55433	GSM1336571	Bladder cancer	Urothelial carcinoma	High grade	High grade-Low grade
BC_S14	GPL18348	GSE55433	GSM1336572	Bladder cancer	Urothelial carcinoma	High grade	High grade-Low grade
BC_S14	GPL18348	GSE55433	GSM1336573	Bladder cancer	Urothelial carcinoma	High grade	High grade-Low grade
BC_S14	GPL18348	GSE55433	GSM1336574	Bladder cancer	Urothelial carcinoma	High grade	High grade-Low grade
BC_S15	GPL10558	GSE51843	GSM1253682	Bladder cancer	Bladder cancer	Normal	Tumor-Normal
BC_S15	GPL10558	GSE51843	GSM1253683	Bladder cancer	Bladder cancer	Normal	Tumor-Normal
BC_S15	GPL10558	GSE51843	GSM1253684	Bladder cancer	Bladder cancer	Normal	Tumor-Normal
BC_S15	GPL10558	GSE51843	GSM1253685	Bladder cancer	Bladder cancer	Normal	Tumor-Normal
BC_S15	GPL10558	GSE51843	GSM1253686	Bladder cancer	Bladder cancer	Normal	Tumor-Normal
BC_S15	GPL10558	GSE51843	GSM1253687	Bladder cancer	Bladder cancer	Normal	Tumor-Normal
BC_S15	GPL10558	GSE51843	GSM1253688	Bladder cancer	Bladder cancer	Tumor	Tumor-Normal
BC_S15	GPL10558	GSE51843	GSM1253689	Bladder cancer	Bladder cancer	Tumor	Tumor-Normal
BC_S15	GPL10558	GSE51843	GSM1253690	Bladder cancer	Bladder cancer	Tumor	Tumor-Normal
BC_S15	GPL10558	GSE51843	GSM1253691	Bladder cancer	Bladder cancer	Tumor	Tumor-Normal
BC_S15	GPL10558	GSE51843	GSM1253692	Bladder cancer	Bladder cancer	Tumor	Tumor-Normal
BC_S16	GPL13825	GSE51493	GSM1246519	Bladder cancer	Urothelial carcinoma	Normal	Tumor-Normal
BC_S16	GPL13825	GSE51493	GSM1246520	Bladder cancer	Urothelial carcinoma	Normal	Tumor-Normal
BC_S16	GPL13825	GSE51493	GSM1246521	Bladder cancer	Urothelial carcinoma	Normal	Tumor-Normal
BC_S16	GPL13825	GSE51493	GSM1246522	Bladder cancer	Urothelial carcinoma	Tumor	Tumor-Normal
BC_S16	GPL13825	GSE51493	GSM1246524	Bladder cancer	Urothelial carcinoma	Tumor	Tumor-Normal
BC_S16	GPL13825	GSE51493	GSM1246525	Bladder cancer	Urothelial carcinoma	Tumor	Tumor-Normal
BC_S16	GPL13825	GSE51493	GSM1246526	Bladder cancer	Urothelial carcinoma	Tumor	Tumor-Normal
BC_S16	GPL13825	GSE51493	GSM1246527	Bladder cancer	Urothelial carcinoma	Tumor	Tumor-Normal
BC_S16	GPL13825	GSE51493	GSM1246528	Bladder cancer	Urothelial carcinoma	Tumor	Tumor-Normal
BC_S16	GPL13825	GSE51493	GSM1246529	Bladder cancer	Urothelial carcinoma	Tumor	Tumor-Normal
BC_S16	GPL13825	GSE51493	GSM1246530	Bladder cancer	Urothelial carcinoma	Tumor	Tumor-Normal
BC_S16	GPL13825	GSE51493	GSM1246531	Bladder cancer	Urothelial carcinoma	Tumor	Tumor-Normal
BC_S16	GPL13825	GSE51493	GSM1246532	Bladder cancer	Urothelial carcinoma	Tumor	Tumor-Normal
BC_S16	GPL13825	GSE51493	GSM1246533	Bladder cancer	Urothelial carcinoma	Tumor	Tumor-Normal
BC_S16	GPL13825	GSE51493	GSM1246534	Bladder cancer	Urothelial carcinoma	Tumor	Tumor-Normal
BC_S17	GPL6884	GSE52519	GSM1268190	Bladder cancer	Bladder cancer	Tumor	Tumor-Normal
BC_S17	GPL6884	GSE52519	GSM1268191	Bladder cancer	Bladder cancer	Tumor	Tumor-Normal
BC_S17	GPL6884	GSE52519	GSM1268192	Bladder cancer	Bladder cancer	Tumor	Tumor-Normal
BC_S17	GPL6884	GSE52519	GSM1268193	Bladder cancer	Bladder cancer	Tumor	Tumor-Normal
BC_S17	GPL6884	GSE52519	GSM1268194	Bladder cancer	Bladder cancer	Tumor	Tumor-Normal
BC_S17	GPL6884	GSE52519	GSM1268195	Bladder cancer	Bladder cancer	Tumor	Tumor-Normal
BC_S17	GPL6884	GSE52519	GSM1268196	Bladder cancer	Bladder cancer	Tumor	Tumor-Normal
BC_S17	GPL6884	GSE52519	GSM1268197	Bladder cancer	Bladder cancer	Tumor	Tumor-Normal
BC_S17	GPL6884	GSE52519	GSM1268198	Bladder cancer	Bladder cancer	Tumor	Tumor-Normal
BC_S17	GPL6884	GSE52519	GSM1268199	Bladder cancer	Bladder cancer	Normal	Tumor-Normal
BC_S17	GPL6884	GSE52519	GSM1268200	Bladder cancer	Bladder cancer	Normal	Tumor-Normal
BC_S17	GPL6884	GSE52519	GSM1268201	Bladder cancer	Bladder cancer	Normal	Tumor-Normal
BC_S19	GPL14550	GSE45184	GSM1098731	Bladder cancer	Bladder cancer	Tumor	Tumor-Normal
BC_S19	GPL14550	GSE45184	GSM1098732	Bladder cancer	Bladder cancer	Normal	Tumor-Normal
BC_S19	GPL14550	GSE45184	GSM1098733	Bladder cancer	Bladder cancer	Tumor	Tumor-Normal
BC_S19	GPL14550	GSE45184	GSM1098734	Bladder cancer	Bladder cancer	Normal	Tumor-Normal
BC_S19	GPL14550	GSE45184	GSM1098735	Bladder cancer	Bladder cancer	Tumor	Tumor-Normal
BC_S19	GPL14550	GSE45184	GSM1098736	Bladder cancer	Bladder cancer	Normal	Tumor-Normal
BC_S20	GPL5175	GSE41614	GSM1020196	Bladder cancer	Bladder cancer	Normal	Tumor-Normal
BC_S20	GPL5175	GSE41614	GSM1020197	Bladder cancer	Bladder cancer	Tumor	Tumor-Normal
BC_S20	GPL5175	GSE41614	GSM1020198	Bladder cancer	Bladder cancer	Normal	Tumor-Normal
BC_S20	GPL5175	GSE41614	GSM1020199	Bladder cancer	Bladder cancer	Tumor	Tumor-Normal
BC_S20	GPL5175	GSE41614	GSM1020200	Bladder cancer	Bladder cancer	Normal	Tumor-Normal
BC_S20	GPL5175	GSE41614	GSM1020201	Bladder cancer	Bladder cancer	Tumor	Tumor-Normal
BC_S20	GPL5175	GSE41614	GSM1020202	Bladder cancer	Bladder cancer	Normal	Tumor-Normal
BC_S20	GPL5175	GSE41614	GSM1020203	Bladder cancer	Bladder cancer	Tumor	Tumor-Normal
BC_S20	GPL5175	GSE41614	GSM1020204	Bladder cancer	Bladder cancer	Normal	Tumor-Normal
BC_S20	GPL5175	GSE41614	GSM1020205	Bladder cancer	Bladder cancer	Tumor	Tumor-Normal
BC_S21	GPL570	GSE31189	GSM773124	Bladder cancer	Urothelial carcinoma	Tumor	Tumor-Normal
BC_S21	GPL570	GSE31189	GSM773125	Bladder cancer	Urothelial carcinoma	Tumor	Tumor-Normal
BC_S21	GPL570	GSE31189	GSM773126	Bladder cancer	Urothelial carcinoma	Tumor	Tumor-Normal
BC_S21	GPL570	GSE31189	GSM773127	Bladder cancer	Urothelial carcinoma	Tumor	Tumor-Normal
BC_S21	GPL570	GSE31189	GSM773128	Bladder cancer	Urothelial carcinoma	Tumor	Tumor-Normal
BC_S21	GPL570	GSE31189	GSM773129	Bladder cancer	Urothelial carcinoma	Tumor	Tumor-Normal
BC_S21	GPL570	GSE31189	GSM773130	Bladder cancer	Urothelial carcinoma	Tumor	Tumor-Normal
BC_S21	GPL570	GSE31189	GSM773131	Bladder cancer	Urothelial carcinoma	Tumor	Tumor-Normal
BC_S21	GPL570	GSE31189	GSM773132	Bladder cancer	Urothelial carcinoma	Tumor	Tumor-Normal
BC_S21	GPL570	GSE31189	GSM773133	Bladder cancer	Urothelial carcinoma	Tumor	Tumor-Normal
BC_S21	GPL570	GSE31189	GSM773134	Bladder cancer	Urothelial carcinoma	Tumor	Tumor-Normal
BC_S21	GPL570	GSE31189	GSM773135	Bladder cancer	Urothelial carcinoma	Tumor	Tumor-Normal
BC_S21	GPL570	GSE31189	GSM773136	Bladder cancer	Urothelial carcinoma	Tumor	Tumor-Normal
BC_S21	GPL570	GSE31189	GSM773137	Bladder cancer	Urothelial carcinoma	Tumor	Tumor-Normal
BC_S21	GPL570	GSE31189	GSM773138	Bladder cancer	Urothelial carcinoma	Tumor	Tumor-Normal
BC_S21	GPL570	GSE31189	GSM773139	Bladder cancer	Urothelial carcinoma	Tumor	Tumor-Normal
BC_S21	GPL570	GSE31189	GSM773140	Bladder cancer	Urothelial carcinoma	Tumor	Tumor-Normal
BC_S21	GPL570	GSE31189	GSM773141	Bladder cancer	Urothelial carcinoma	Tumor	Tumor-Normal
BC_S21	GPL570	GSE31189	GSM773142	Bladder cancer	Urothelial carcinoma	Tumor	Tumor-Normal
BC_S21	GPL570	GSE31189	GSM773143	Bladder cancer	Urothelial carcinoma	Tumor	Tumor-Normal
BC_S21	GPL570	GSE31189	GSM773144	Bladder cancer	Urothelial carcinoma	Tumor	Tumor-Normal
BC_S21	GPL570	GSE31189	GSM773145	Bladder cancer	Urothelial carcinoma	Tumor	Tumor-Normal
BC_S21	GPL570	GSE31189	GSM773146	Bladder cancer	Urothelial carcinoma	Tumor	Tumor-Normal
BC_S21	GPL570	GSE31189	GSM773147	Bladder cancer	Urothelial carcinoma	Tumor	Tumor-Normal
BC_S21	GPL570	GSE31189	GSM773148	Bladder cancer	Urothelial carcinoma	Tumor	Tumor-Normal
BC_S21	GPL570	GSE31189	GSM773149	Bladder cancer	Urothelial carcinoma	Tumor	Tumor-Normal
BC_S21	GPL570	GSE31189	GSM773150	Bladder cancer	Urothelial carcinoma	Tumor	Tumor-Normal
BC_S21	GPL570	GSE31189	GSM773151	Bladder cancer	Urothelial carcinoma	Tumor	Tumor-Normal
BC_S21	GPL570	GSE31189	GSM773152	Bladder cancer	Urothelial carcinoma	Tumor	Tumor-Normal
BC_S21	GPL570	GSE31189	GSM773153	Bladder cancer	Urothelial carcinoma	Tumor	Tumor-Normal
BC_S21	GPL570	GSE31189	GSM773154	Bladder cancer	Urothelial carcinoma	Tumor	Tumor-Normal
BC_S21	GPL570	GSE31189	GSM773155	Bladder cancer	Urothelial carcinoma	Tumor	Tumor-Normal
BC_S21	GPL570	GSE31189	GSM773156	Bladder cancer	Urothelial carcinoma	Tumor	Tumor-Normal
BC_S21	GPL570	GSE31189	GSM773157	Bladder cancer	Urothelial carcinoma	Tumor	Tumor-Normal
BC_S21	GPL570	GSE31189	GSM773158	Bladder cancer	Urothelial carcinoma	Tumor	Tumor-Normal
BC_S21	GPL570	GSE31189	GSM773159	Bladder cancer	Urothelial carcinoma	Tumor	Tumor-Normal
BC_S21	GPL570	GSE31189	GSM773160	Bladder cancer	Urothelial carcinoma	Tumor	Tumor-Normal
BC_S21	GPL570	GSE31189	GSM773161	Bladder cancer	Urothelial carcinoma	Tumor	Tumor-Normal
BC_S21	GPL570	GSE31189	GSM773162	Bladder cancer	Urothelial carcinoma	Tumor	Tumor-Normal
BC_S21	GPL570	GSE31189	GSM773163	Bladder cancer	Urothelial carcinoma	Tumor	Tumor-Normal
BC_S21	GPL570	GSE31189	GSM773164	Bladder cancer	Urothelial carcinoma	Tumor	Tumor-Normal
BC_S21	GPL570	GSE31189	GSM773165	Bladder cancer	Urothelial carcinoma	Tumor	Tumor-Normal
BC_S21	GPL570	GSE31189	GSM773166	Bladder cancer	Urothelial carcinoma	Tumor	Tumor-Normal
BC_S21	GPL570	GSE31189	GSM773167	Bladder cancer	Urothelial carcinoma	Tumor	Tumor-Normal
BC_S21	GPL570	GSE31189	GSM773168	Bladder cancer	Urothelial carcinoma	Tumor	Tumor-Normal
BC_S21	GPL570	GSE31189	GSM773169	Bladder cancer	Urothelial carcinoma	Tumor	Tumor-Normal
BC_S21	GPL570	GSE31189	GSM773170	Bladder cancer	Urothelial carcinoma	Tumor	Tumor-Normal
BC_S21	GPL570	GSE31189	GSM773171	Bladder cancer	Urothelial carcinoma	Tumor	Tumor-Normal
BC_S21	GPL570	GSE31189	GSM773172	Bladder cancer	Urothelial carcinoma	Tumor	Tumor-Normal
BC_S21	GPL570	GSE31189	GSM773173	Bladder cancer	Urothelial carcinoma	Tumor	Tumor-Normal
BC_S21	GPL570	GSE31189	GSM773174	Bladder cancer	Urothelial carcinoma	Tumor	Tumor-Normal
BC_S21	GPL570	GSE31189	GSM773175	Bladder cancer	Urothelial carcinoma	Tumor	Tumor-Normal
BC_S21	GPL570	GSE31189	GSM773176	Bladder cancer	Urothelial carcinoma	Normal	Tumor-Normal
BC_S21	GPL570	GSE31189	GSM773177	Bladder cancer	Urothelial carcinoma	Normal	Tumor-Normal
BC_S21	GPL570	GSE31189	GSM773178	Bladder cancer	Urothelial carcinoma	Normal	Tumor-Normal
BC_S21	GPL570	GSE31189	GSM773179	Bladder cancer	Urothelial carcinoma	Normal	Tumor-Normal
BC_S21	GPL570	GSE31189	GSM773180	Bladder cancer	Urothelial carcinoma	Normal	Tumor-Normal
BC_S21	GPL570	GSE31189	GSM773181	Bladder cancer	Urothelial carcinoma	Normal	Tumor-Normal
BC_S21	GPL570	GSE31189	GSM773182	Bladder cancer	Urothelial carcinoma	Normal	Tumor-Normal
BC_S21	GPL570	GSE31189	GSM773183	Bladder cancer	Urothelial carcinoma	Normal	Tumor-Normal
BC_S21	GPL570	GSE31189	GSM773184	Bladder cancer	Urothelial carcinoma	Normal	Tumor-Normal
BC_S21	GPL570	GSE31189	GSM773185	Bladder cancer	Urothelial carcinoma	Normal	Tumor-Normal
BC_S21	GPL570	GSE31189	GSM773186	Bladder cancer	Urothelial carcinoma	Normal	Tumor-Normal
BC_S21	GPL570	GSE31189	GSM773187	Bladder cancer	Urothelial carcinoma	Normal	Tumor-Normal
BC_S21	GPL570	GSE31189	GSM773188	Bladder cancer	Urothelial carcinoma	Normal	Tumor-Normal
BC_S21	GPL570	GSE31189	GSM773189	Bladder cancer	Urothelial carcinoma	Normal	Tumor-Normal
BC_S21	GPL570	GSE31189	GSM773190	Bladder cancer	Urothelial carcinoma	Normal	Tumor-Normal
BC_S21	GPL570	GSE31189	GSM773191	Bladder cancer	Urothelial carcinoma	Normal	Tumor-Normal
BC_S21	GPL570	GSE31189	GSM773192	Bladder cancer	Urothelial carcinoma	Normal	Tumor-Normal
BC_S21	GPL570	GSE31189	GSM773193	Bladder cancer	Urothelial carcinoma	Normal	Tumor-Normal
BC_S21	GPL570	GSE31189	GSM773194	Bladder cancer	Urothelial carcinoma	Normal	Tumor-Normal
BC_S21	GPL570	GSE31189	GSM773195	Bladder cancer	Urothelial carcinoma	Normal	Tumor-Normal
BC_S21	GPL570	GSE31189	GSM773196	Bladder cancer	Urothelial carcinoma	Normal	Tumor-Normal
BC_S21	GPL570	GSE31189	GSM773197	Bladder cancer	Urothelial carcinoma	Normal	Tumor-Normal
BC_S21	GPL570	GSE31189	GSM773198	Bladder cancer	Urothelial carcinoma	Normal	Tumor-Normal
BC_S21	GPL570	GSE31189	GSM773199	Bladder cancer	Urothelial carcinoma	Normal	Tumor-Normal
BC_S21	GPL570	GSE31189	GSM773200	Bladder cancer	Urothelial carcinoma	Normal	Tumor-Normal
BC_S21	GPL570	GSE31189	GSM773201	Bladder cancer	Urothelial carcinoma	Normal	Tumor-Normal
BC_S21	GPL570	GSE31189	GSM773202	Bladder cancer	Urothelial carcinoma	Normal	Tumor-Normal
BC_S21	GPL570	GSE31189	GSM773203	Bladder cancer	Urothelial carcinoma	Normal	Tumor-Normal
BC_S21	GPL570	GSE31189	GSM773204	Bladder cancer	Urothelial carcinoma	Normal	Tumor-Normal
BC_S21	GPL570	GSE31189	GSM773205	Bladder cancer	Urothelial carcinoma	Normal	Tumor-Normal
BC_S21	GPL570	GSE31189	GSM773206	Bladder cancer	Urothelial carcinoma	Normal	Tumor-Normal
BC_S21	GPL570	GSE31189	GSM773207	Bladder cancer	Urothelial carcinoma	Normal	Tumor-Normal
BC_S21	GPL570	GSE31189	GSM773208	Bladder cancer	Urothelial carcinoma	Normal	Tumor-Normal
BC_S21	GPL570	GSE31189	GSM773209	Bladder cancer	Urothelial carcinoma	Normal	Tumor-Normal
BC_S21	GPL570	GSE31189	GSM773210	Bladder cancer	Urothelial carcinoma	Normal	Tumor-Normal
BC_S21	GPL570	GSE31189	GSM773211	Bladder cancer	Urothelial carcinoma	Normal	Tumor-Normal
BC_S21	GPL570	GSE31189	GSM773212	Bladder cancer	Urothelial carcinoma	Normal	Tumor-Normal
BC_S21	GPL570	GSE31189	GSM773213	Bladder cancer	Urothelial carcinoma	Normal	Tumor-Normal
BC_S21	GPL570	GSE31189	GSM773214	Bladder cancer	Urothelial carcinoma	Normal	Tumor-Normal
BC_S21	GPL570	GSE31189	GSM773215	Bladder cancer	Urothelial carcinoma	Normal	Tumor-Normal
BC_S28	GPL6947	GSE32548	GSM806803	Bladder cancer	Bladder cancer	High grade	High grade-Low grade
BC_S28	GPL6947	GSE32548	GSM806804	Bladder cancer	Bladder cancer	Low grade	High grade-Low grade
BC_S28	GPL6947	GSE32548	GSM806805	Bladder cancer	Bladder cancer	High grade	High grade-Low grade
BC_S28	GPL6947	GSE32548	GSM806806	Bladder cancer	Bladder cancer	Low grade	High grade-Low grade
BC_S28	GPL6947	GSE32548	GSM806807	Bladder cancer	Bladder cancer	Low grade	High grade-Low grade
BC_S28	GPL6947	GSE32548	GSM806808	Bladder cancer	Bladder cancer	Low grade	High grade-Low grade
BC_S28	GPL6947	GSE32548	GSM806809	Bladder cancer	Bladder cancer	Low grade	High grade-Low grade
BC_S28	GPL6947	GSE32548	GSM806810	Bladder cancer	Bladder cancer	High grade	High grade-Low grade
BC_S28	GPL6947	GSE32548	GSM806811	Bladder cancer	Bladder cancer	Low grade	High grade-Low grade
BC_S28	GPL6947	GSE32548	GSM806812	Bladder cancer	Bladder cancer	Low grade	High grade-Low grade
BC_S28	GPL6947	GSE32548	GSM806813	Bladder cancer	Bladder cancer	Low grade	High grade-Low grade
BC_S28	GPL6947	GSE32548	GSM806814	Bladder cancer	Bladder cancer	High grade	High grade-Low grade
BC_S28	GPL6947	GSE32548	GSM806815	Bladder cancer	Bladder cancer	High grade	High grade-Low grade
BC_S28	GPL6947	GSE32548	GSM806816	Bladder cancer	Bladder cancer	Low grade	High grade-Low grade
BC_S28	GPL6947	GSE32548	GSM806817	Bladder cancer	Bladder cancer	Low grade	High grade-Low grade
BC_S28	GPL6947	GSE32548	GSM806818	Bladder cancer	Bladder cancer	Low grade	High grade-Low grade
BC_S28	GPL6947	GSE32548	GSM806819	Bladder cancer	Bladder cancer	Low grade	High grade-Low grade
BC_S28	GPL6947	GSE32548	GSM806820	Bladder cancer	Bladder cancer	High grade	High grade-Low grade
BC_S28	GPL6947	GSE32548	GSM806821	Bladder cancer	Bladder cancer	Low grade	High grade-Low grade
BC_S28	GPL6947	GSE32548	GSM806822	Bladder cancer	Bladder cancer	High grade	High grade-Low grade
BC_S28	GPL6947	GSE32548	GSM806823	Bladder cancer	Bladder cancer	Low grade	High grade-Low grade
BC_S28	GPL6947	GSE32548	GSM806824	Bladder cancer	Bladder cancer	High grade	High grade-Low grade
BC_S28	GPL6947	GSE32548	GSM806825	Bladder cancer	Bladder cancer	Low grade	High grade-Low grade
BC_S28	GPL6947	GSE32548	GSM806826	Bladder cancer	Bladder cancer	High grade	High grade-Low grade
BC_S28	GPL6947	GSE32548	GSM806827	Bladder cancer	Bladder cancer	Low grade	High grade-Low grade
BC_S28	GPL6947	GSE32548	GSM806828	Bladder cancer	Bladder cancer	Low grade	High grade-Low grade
BC_S28	GPL6947	GSE32548	GSM806829	Bladder cancer	Bladder cancer	Low grade	High grade-Low grade
BC_S28	GPL6947	GSE32548	GSM806830	Bladder cancer	Bladder cancer	High grade	High grade-Low grade
BC_S28	GPL6947	GSE32548	GSM806831	Bladder cancer	Bladder cancer	Low grade	High grade-Low grade
BC_S28	GPL6947	GSE32548	GSM806832	Bladder cancer	Bladder cancer	High grade	High grade-Low grade
BC_S28	GPL6947	GSE32548	GSM806833	Bladder cancer	Bladder cancer	Low grade	High grade-Low grade
BC_S28	GPL6947	GSE32548	GSM806834	Bladder cancer	Bladder cancer	High grade	High grade-Low grade
BC_S28	GPL6947	GSE32548	GSM806835	Bladder cancer	Bladder cancer	High grade	High grade-Low grade
BC_S28	GPL6947	GSE32548	GSM806836	Bladder cancer	Bladder cancer	High grade	High grade-Low grade
BC_S28	GPL6947	GSE32548	GSM806837	Bladder cancer	Bladder cancer	Low grade	High grade-Low grade
BC_S28	GPL6947	GSE32548	GSM806838	Bladder cancer	Bladder cancer	Low grade	High grade-Low grade
BC_S28	GPL6947	GSE32548	GSM806839	Bladder cancer	Bladder cancer	Low grade	High grade-Low grade
BC_S28	GPL6947	GSE32548	GSM806840	Bladder cancer	Bladder cancer	Low grade	High grade-Low grade
BC_S28	GPL6947	GSE32548	GSM806841	Bladder cancer	Bladder cancer	Low grade	High grade-Low grade
BC_S28	GPL6947	GSE32548	GSM806842	Bladder cancer	Bladder cancer	Low grade	High grade-Low grade
BC_S28	GPL6947	GSE32548	GSM806843	Bladder cancer	Bladder cancer	High grade	High grade-Low grade
BC_S28	GPL6947	GSE32548	GSM806844	Bladder cancer	Bladder cancer	High grade	High grade-Low grade
BC_S28	GPL6947	GSE32548	GSM806845	Bladder cancer	Bladder cancer	High grade	High grade-Low grade
BC_S28	GPL6947	GSE32548	GSM806846	Bladder cancer	Bladder cancer	Low grade	High grade-Low grade
BC_S28	GPL6947	GSE32548	GSM806847	Bladder cancer	Bladder cancer	Low grade	High grade-Low grade
BC_S28	GPL6947	GSE32548	GSM806848	Bladder cancer	Bladder cancer	Low grade	High grade-Low grade
BC_S28	GPL6947	GSE32548	GSM806849	Bladder cancer	Bladder cancer	High grade	High grade-Low grade
BC_S28	GPL6947	GSE32548	GSM806850	Bladder cancer	Bladder cancer	Low grade	High grade-Low grade
BC_S28	GPL6947	GSE32548	GSM806851	Bladder cancer	Bladder cancer	Low grade	High grade-Low grade
BC_S28	GPL6947	GSE32548	GSM806852	Bladder cancer	Bladder cancer	High grade	High grade-Low grade
BC_S28	GPL6947	GSE32548	GSM806853	Bladder cancer	Bladder cancer	Low grade	High grade-Low grade
BC_S28	GPL6947	GSE32548	GSM806854	Bladder cancer	Bladder cancer	Low grade	High grade-Low grade
BC_S28	GPL6947	GSE32548	GSM806855	Bladder cancer	Bladder cancer	High grade	High grade-Low grade
BC_S28	GPL6947	GSE32548	GSM806856	Bladder cancer	Bladder cancer	High grade	High grade-Low grade
BC_S28	GPL6947	GSE32548	GSM806857	Bladder cancer	Bladder cancer	High grade	High grade-Low grade
BC_S28	GPL6947	GSE32548	GSM806858	Bladder cancer	Bladder cancer	Low grade	High grade-Low grade
BC_S28	GPL6947	GSE32548	GSM806859	Bladder cancer	Bladder cancer	Low grade	High grade-Low grade
BC_S28	GPL6947	GSE32548	GSM806860	Bladder cancer	Bladder cancer	Low grade	High grade-Low grade
BC_S28	GPL6947	GSE32548	GSM806861	Bladder cancer	Bladder cancer	High grade	High grade-Low grade
BC_S28	GPL6947	GSE32548	GSM806862	Bladder cancer	Bladder cancer	Low grade	High grade-Low grade
BC_S28	GPL6947	GSE32548	GSM806863	Bladder cancer	Bladder cancer	High grade	High grade-Low grade
BC_S28	GPL6947	GSE32548	GSM806864	Bladder cancer	Bladder cancer	High grade	High grade-Low grade
BC_S28	GPL6947	GSE32548	GSM806865	Bladder cancer	Bladder cancer	High grade	High grade-Low grade
BC_S28	GPL6947	GSE32548	GSM806866	Bladder cancer	Bladder cancer	Low grade	High grade-Low grade
BC_S28	GPL6947	GSE32548	GSM806867	Bladder cancer	Bladder cancer	High grade	High grade-Low grade
BC_S28	GPL6947	GSE32548	GSM806868	Bladder cancer	Bladder cancer	High grade	High grade-Low grade
BC_S28	GPL6947	GSE32548	GSM806869	Bladder cancer	Bladder cancer	Low grade	High grade-Low grade
BC_S28	GPL6947	GSE32548	GSM806870	Bladder cancer	Bladder cancer	Low grade	High grade-Low grade
BC_S28	GPL6947	GSE32548	GSM806871	Bladder cancer	Bladder cancer	Low grade	High grade-Low grade
BC_S28	GPL6947	GSE32548	GSM806872	Bladder cancer	Bladder cancer	High grade	High grade-Low grade
BC_S28	GPL6947	GSE32548	GSM806873	Bladder cancer	Bladder cancer	High grade	High grade-Low grade
BC_S28	GPL6947	GSE32548	GSM806874	Bladder cancer	Bladder cancer	High grade	High grade-Low grade
BC_S28	GPL6947	GSE32548	GSM806875	Bladder cancer	Bladder cancer	High grade	High grade-Low grade
BC_S28	GPL6947	GSE32548	GSM806876	Bladder cancer	Bladder cancer	High grade	High grade-Low grade
BC_S28	GPL6947	GSE32548	GSM806877	Bladder cancer	Bladder cancer	Low grade	High grade-Low grade
BC_S28	GPL6947	GSE32548	GSM806878	Bladder cancer	Bladder cancer	High grade	High grade-Low grade
BC_S28	GPL6947	GSE32548	GSM806879	Bladder cancer	Bladder cancer	High grade	High grade-Low grade
BC_S28	GPL6947	GSE32548	GSM806880	Bladder cancer	Bladder cancer	High grade	High grade-Low grade
BC_S28	GPL6947	GSE32548	GSM806881	Bladder cancer	Bladder cancer	High grade	High grade-Low grade
BC_S28	GPL6947	GSE32548	GSM806882	Bladder cancer	Bladder cancer	Low grade	High grade-Low grade
BC_S28	GPL6947	GSE32548	GSM806883	Bladder cancer	Bladder cancer	High grade	High grade-Low grade
BC_S28	GPL6947	GSE32548	GSM806884	Bladder cancer	Bladder cancer	Low grade	High grade-Low grade
BC_S28	GPL6947	GSE32548	GSM806885	Bladder cancer	Bladder cancer	Low grade	High grade-Low grade
BC_S28	GPL6947	GSE32548	GSM806886	Bladder cancer	Bladder cancer	High grade	High grade-Low grade
BC_S28	GPL6947	GSE32548	GSM806887	Bladder cancer	Bladder cancer	High grade	High grade-Low grade
BC_S28	GPL6947	GSE32548	GSM806888	Bladder cancer	Bladder cancer	Low grade	High grade-Low grade
BC_S28	GPL6947	GSE32548	GSM806889	Bladder cancer	Bladder cancer	High grade	High grade-Low grade
BC_S28	GPL6947	GSE32548	GSM806890	Bladder cancer	Bladder cancer	Low grade	High grade-Low grade
BC_S28	GPL6947	GSE32548	GSM806891	Bladder cancer	Bladder cancer	High grade	High grade-Low grade
BC_S28	GPL6947	GSE32548	GSM806892	Bladder cancer	Bladder cancer	Low grade	High grade-Low grade
BC_S28	GPL6947	GSE32548	GSM806893	Bladder cancer	Bladder cancer	High grade	High grade-Low grade
BC_S28	GPL6947	GSE32548	GSM806894	Bladder cancer	Bladder cancer	High grade	High grade-Low grade
BC_S28	GPL6947	GSE32548	GSM806895	Bladder cancer	Bladder cancer	High grade	High grade-Low grade
BC_S28	GPL6947	GSE32548	GSM806896	Bladder cancer	Bladder cancer	Low grade	High grade-Low grade
BC_S28	GPL6947	GSE32548	GSM806897	Bladder cancer	Bladder cancer	Low grade	High grade-Low grade
BC_S28	GPL6947	GSE32548	GSM806898	Bladder cancer	Bladder cancer	High grade	High grade-Low grade
BC_S28	GPL6947	GSE32548	GSM806899	Bladder cancer	Bladder cancer	Low grade	High grade-Low grade
BC_S28	GPL6947	GSE32548	GSM806900	Bladder cancer	Bladder cancer	High grade	High grade-Low grade
BC_S28	GPL6947	GSE32548	GSM806901	Bladder cancer	Bladder cancer	High grade	High grade-Low grade
BC_S28	GPL6947	GSE32548	GSM806902	Bladder cancer	Bladder cancer	High grade	High grade-Low grade
BC_S28	GPL6947	GSE32548	GSM806903	Bladder cancer	Bladder cancer	High grade	High grade-Low grade
BC_S28	GPL6947	GSE32548	GSM806904	Bladder cancer	Bladder cancer	High grade	High grade-Low grade
BC_S28	GPL6947	GSE32548	GSM806905	Bladder cancer	Bladder cancer	Low grade	High grade-Low grade
BC_S28	GPL6947	GSE32548	GSM806906	Bladder cancer	Bladder cancer	High grade	High grade-Low grade
BC_S28	GPL6947	GSE32548	GSM806907	Bladder cancer	Bladder cancer	Low grade	High grade-Low grade
BC_S28	GPL6947	GSE32548	GSM806908	Bladder cancer	Bladder cancer	Low grade	High grade-Low grade
BC_S28	GPL6947	GSE32548	GSM806909	Bladder cancer	Bladder cancer	High grade	High grade-Low grade
BC_S28	GPL6947	GSE32548	GSM806910	Bladder cancer	Bladder cancer	High grade	High grade-Low grade
BC_S28	GPL6947	GSE32548	GSM806911	Bladder cancer	Bladder cancer	High grade	High grade-Low grade
BC_S28	GPL6947	GSE32548	GSM806912	Bladder cancer	Bladder cancer	Low grade	High grade-Low grade
BC_S28	GPL6947	GSE32548	GSM806913	Bladder cancer	Bladder cancer	High grade	High grade-Low grade
BC_S28	GPL6947	GSE32548	GSM806914	Bladder cancer	Bladder cancer	High grade	High grade-Low grade
BC_S28	GPL6947	GSE32548	GSM806915	Bladder cancer	Bladder cancer	Low grade	High grade-Low grade
BC_S28	GPL6947	GSE32548	GSM806916	Bladder cancer	Bladder cancer	High grade	High grade-Low grade
BC_S28	GPL6947	GSE32548	GSM806917	Bladder cancer	Bladder cancer	High grade	High grade-Low grade
BC_S28	GPL6947	GSE32548	GSM806918	Bladder cancer	Bladder cancer	High grade	High grade-Low grade
BC_S28	GPL6947	GSE32548	GSM806919	Bladder cancer	Bladder cancer	High grade	High grade-Low grade
BC_S28	GPL6947	GSE32548	GSM806920	Bladder cancer	Bladder cancer	High grade	High grade-Low grade
BC_S28	GPL6947	GSE32548	GSM806921	Bladder cancer	Bladder cancer	High grade	High grade-Low grade
BC_S28	GPL6947	GSE32548	GSM806922	Bladder cancer	Bladder cancer	High grade	High grade-Low grade
BC_S28	GPL6947	GSE32548	GSM806923	Bladder cancer	Bladder cancer	High grade	High grade-Low grade
BC_S28	GPL6947	GSE32548	GSM806924	Bladder cancer	Bladder cancer	High grade	High grade-Low grade
BC_S28	GPL6947	GSE32548	GSM806925	Bladder cancer	Bladder cancer	High grade	High grade-Low grade
BC_S28	GPL6947	GSE32548	GSM806926	Bladder cancer	Bladder cancer	High grade	High grade-Low grade
BC_S28	GPL6947	GSE32548	GSM806927	Bladder cancer	Bladder cancer	High grade	High grade-Low grade
BC_S28	GPL6947	GSE32548	GSM806928	Bladder cancer	Bladder cancer	High grade	High grade-Low grade
BC_S28	GPL6947	GSE32548	GSM806929	Bladder cancer	Bladder cancer	High grade	High grade-Low grade
BC_S28	GPL6947	GSE32548	GSM806930	Bladder cancer	Bladder cancer	High grade	High grade-Low grade
BC_S28	GPL6947	GSE32548	GSM806931	Bladder cancer	Bladder cancer	High grade	High grade-Low grade
BC_S28	GPL6947	GSE32548	GSM806932	Bladder cancer	Bladder cancer	High grade	High grade-Low grade
BC_S28	GPL6947	GSE32548	GSM806933	Bladder cancer	Bladder cancer	High grade	High grade-Low grade
BC_S29	GPL6947	GSE32894	GSM814052	Bladder cancer	Urothelial carcinoma	Low grade	High grade-Low grade
BC_S29	GPL6947	GSE32894	GSM814053	Bladder cancer	Urothelial carcinoma	Low grade	High grade-Low grade
BC_S29	GPL6947	GSE32894	GSM814054	Bladder cancer	Urothelial carcinoma	Low grade	High grade-Low grade
BC_S29	GPL6947	GSE32894	GSM814055	Bladder cancer	Urothelial carcinoma	Low grade	High grade-Low grade
BC_S29	GPL6947	GSE32894	GSM814056	Bladder cancer	Urothelial carcinoma	High grade	High grade-Low grade
BC_S29	GPL6947	GSE32894	GSM814057	Bladder cancer	Urothelial carcinoma	Low grade	High grade-Low grade
BC_S29	GPL6947	GSE32894	GSM814058	Bladder cancer	Urothelial carcinoma	Low grade	High grade-Low grade
BC_S29	GPL6947	GSE32894	GSM814059	Bladder cancer	Urothelial carcinoma	Low grade	High grade-Low grade
BC_S29	GPL6947	GSE32894	GSM814060	Bladder cancer	Urothelial carcinoma	High grade	High grade-Low grade
BC_S29	GPL6947	GSE32894	GSM814061	Bladder cancer	Urothelial carcinoma	Low grade	High grade-Low grade
BC_S29	GPL6947	GSE32894	GSM814062	Bladder cancer	Urothelial carcinoma	Low grade	High grade-Low grade
BC_S29	GPL6947	GSE32894	GSM814063	Bladder cancer	Urothelial carcinoma	High grade	High grade-Low grade
BC_S29	GPL6947	GSE32894	GSM814064	Bladder cancer	Urothelial carcinoma	High grade	High grade-Low grade
BC_S29	GPL6947	GSE32894	GSM814065	Bladder cancer	Urothelial carcinoma	Low grade	High grade-Low grade
BC_S29	GPL6947	GSE32894	GSM814066	Bladder cancer	Urothelial carcinoma	Low grade	High grade-Low grade
BC_S29	GPL6947	GSE32894	GSM814067	Bladder cancer	Urothelial carcinoma	Low grade	High grade-Low grade
BC_S29	GPL6947	GSE32894	GSM814068	Bladder cancer	Urothelial carcinoma	High grade	High grade-Low grade
BC_S29	GPL6947	GSE32894	GSM814069	Bladder cancer	Urothelial carcinoma	Low grade	High grade-Low grade
BC_S29	GPL6947	GSE32894	GSM814070	Bladder cancer	Urothelial carcinoma	High grade	High grade-Low grade
BC_S29	GPL6947	GSE32894	GSM814071	Bladder cancer	Urothelial carcinoma	Low grade	High grade-Low grade
BC_S29	GPL6947	GSE32894	GSM814072	Bladder cancer	Urothelial carcinoma	High grade	High grade-Low grade
BC_S29	GPL6947	GSE32894	GSM814073	Bladder cancer	Urothelial carcinoma	Low grade	High grade-Low grade
BC_S29	GPL6947	GSE32894	GSM814074	Bladder cancer	Urothelial carcinoma	Low grade	High grade-Low grade
BC_S29	GPL6947	GSE32894	GSM814075	Bladder cancer	Urothelial carcinoma	Low grade	High grade-Low grade
BC_S29	GPL6947	GSE32894	GSM814076	Bladder cancer	Urothelial carcinoma	High grade	High grade-Low grade
BC_S29	GPL6947	GSE32894	GSM814077	Bladder cancer	Urothelial carcinoma	High grade	High grade-Low grade
BC_S29	GPL6947	GSE32894	GSM814078	Bladder cancer	Urothelial carcinoma	Low grade	High grade-Low grade
BC_S29	GPL6947	GSE32894	GSM814079	Bladder cancer	Urothelial carcinoma	High grade	High grade-Low grade
BC_S29	GPL6947	GSE32894	GSM814080	Bladder cancer	Urothelial carcinoma	High grade	High grade-Low grade
BC_S29	GPL6947	GSE32894	GSM814081	Bladder cancer	Urothelial carcinoma	High grade	High grade-Low grade
BC_S29	GPL6947	GSE32894	GSM814082	Bladder cancer	Urothelial carcinoma	Low grade	High grade-Low grade
BC_S29	GPL6947	GSE32894	GSM814083	Bladder cancer	Urothelial carcinoma	High grade	High grade-Low grade
BC_S29	GPL6947	GSE32894	GSM814084	Bladder cancer	Urothelial carcinoma	Low grade	High grade-Low grade
BC_S29	GPL6947	GSE32894	GSM814085	Bladder cancer	Urothelial carcinoma	High grade	High grade-Low grade
BC_S29	GPL6947	GSE32894	GSM814086	Bladder cancer	Urothelial carcinoma	Low grade	High grade-Low grade
BC_S29	GPL6947	GSE32894	GSM814087	Bladder cancer	Urothelial carcinoma	Low grade	High grade-Low grade
BC_S29	GPL6947	GSE32894	GSM814088	Bladder cancer	Urothelial carcinoma	High grade	High grade-Low grade
BC_S29	GPL6947	GSE32894	GSM814089	Bladder cancer	Urothelial carcinoma	Low grade	High grade-Low grade
BC_S29	GPL6947	GSE32894	GSM814090	Bladder cancer	Urothelial carcinoma	High grade	High grade-Low grade
BC_S29	GPL6947	GSE32894	GSM814091	Bladder cancer	Urothelial carcinoma	Low grade	High grade-Low grade
BC_S29	GPL6947	GSE32894	GSM814092	Bladder cancer	Urothelial carcinoma	High grade	High grade-Low grade
BC_S29	GPL6947	GSE32894	GSM814093	Bladder cancer	Urothelial carcinoma	High grade	High grade-Low grade
BC_S29	GPL6947	GSE32894	GSM814094	Bladder cancer	Urothelial carcinoma	High grade	High grade-Low grade
BC_S29	GPL6947	GSE32894	GSM814095	Bladder cancer	Urothelial carcinoma	Low grade	High grade-Low grade
BC_S29	GPL6947	GSE32894	GSM814096	Bladder cancer	Urothelial carcinoma	Low grade	High grade-Low grade
BC_S29	GPL6947	GSE32894	GSM814097	Bladder cancer	Urothelial carcinoma	High grade	High grade-Low grade
BC_S29	GPL6947	GSE32894	GSM814098	Bladder cancer	Urothelial carcinoma	Low grade	High grade-Low grade
BC_S29	GPL6947	GSE32894	GSM814099	Bladder cancer	Urothelial carcinoma	Low grade	High grade-Low grade
BC_S29	GPL6947	GSE32894	GSM814100	Bladder cancer	Urothelial carcinoma	Low grade	High grade-Low grade
BC_S29	GPL6947	GSE32894	GSM814101	Bladder cancer	Urothelial carcinoma	High grade	High grade-Low grade
BC_S29	GPL6947	GSE32894	GSM814102	Bladder cancer	Urothelial carcinoma	Low grade	High grade-Low grade
BC_S29	GPL6947	GSE32894	GSM814103	Bladder cancer	Urothelial carcinoma	Low grade	High grade-Low grade
BC_S29	GPL6947	GSE32894	GSM814104	Bladder cancer	Urothelial carcinoma	High grade	High grade-Low grade
BC_S29	GPL6947	GSE32894	GSM814105	Bladder cancer	Urothelial carcinoma	High grade	High grade-Low grade
BC_S29	GPL6947	GSE32894	GSM814106	Bladder cancer	Urothelial carcinoma	High grade	High grade-Low grade
BC_S29	GPL6947	GSE32894	GSM814107	Bladder cancer	Urothelial carcinoma	High grade	High grade-Low grade
BC_S29	GPL6947	GSE32894	GSM814109	Bladder cancer	Urothelial carcinoma	High grade	High grade-Low grade
BC_S29	GPL6947	GSE32894	GSM814110	Bladder cancer	Urothelial carcinoma	High grade	High grade-Low grade
BC_S29	GPL6947	GSE32894	GSM814111	Bladder cancer	Urothelial carcinoma	High grade	High grade-Low grade
BC_S29	GPL6947	GSE32894	GSM814112	Bladder cancer	Urothelial carcinoma	Low grade	High grade-Low grade
BC_S29	GPL6947	GSE32894	GSM814113	Bladder cancer	Urothelial carcinoma	High grade	High grade-Low grade
BC_S29	GPL6947	GSE32894	GSM814114	Bladder cancer	Urothelial carcinoma	High grade	High grade-Low grade
BC_S29	GPL6947	GSE32894	GSM814115	Bladder cancer	Urothelial carcinoma	High grade	High grade-Low grade
BC_S29	GPL6947	GSE32894	GSM814116	Bladder cancer	Urothelial carcinoma	Low grade	High grade-Low grade
BC_S29	GPL6947	GSE32894	GSM814117	Bladder cancer	Urothelial carcinoma	Low grade	High grade-Low grade
BC_S29	GPL6947	GSE32894	GSM814118	Bladder cancer	Urothelial carcinoma	Low grade	High grade-Low grade
BC_S29	GPL6947	GSE32894	GSM814119	Bladder cancer	Urothelial carcinoma	High grade	High grade-Low grade
BC_S29	GPL6947	GSE32894	GSM814120	Bladder cancer	Urothelial carcinoma	High grade	High grade-Low grade
BC_S29	GPL6947	GSE32894	GSM814121	Bladder cancer	Urothelial carcinoma	High grade	High grade-Low grade
BC_S29	GPL6947	GSE32894	GSM814122	Bladder cancer	Urothelial carcinoma	Low grade	High grade-Low grade
BC_S29	GPL6947	GSE32894	GSM814123	Bladder cancer	Urothelial carcinoma	Low grade	High grade-Low grade
BC_S29	GPL6947	GSE32894	GSM814124	Bladder cancer	Urothelial carcinoma	High grade	High grade-Low grade
BC_S29	GPL6947	GSE32894	GSM814125	Bladder cancer	Urothelial carcinoma	High grade	High grade-Low grade
BC_S29	GPL6947	GSE32894	GSM814126	Bladder cancer	Urothelial carcinoma	High grade	High grade-Low grade
BC_S29	GPL6947	GSE32894	GSM814127	Bladder cancer	Urothelial carcinoma	High grade	High grade-Low grade
BC_S29	GPL6947	GSE32894	GSM814128	Bladder cancer	Urothelial carcinoma	High grade	High grade-Low grade
BC_S29	GPL6947	GSE32894	GSM814129	Bladder cancer	Urothelial carcinoma	Low grade	High grade-Low grade
BC_S29	GPL6947	GSE32894	GSM814130	Bladder cancer	Urothelial carcinoma	High grade	High grade-Low grade
BC_S29	GPL6947	GSE32894	GSM814131	Bladder cancer	Urothelial carcinoma	High grade	High grade-Low grade
BC_S29	GPL6947	GSE32894	GSM814132	Bladder cancer	Urothelial carcinoma	High grade	High grade-Low grade
BC_S29	GPL6947	GSE32894	GSM814133	Bladder cancer	Urothelial carcinoma	Low grade	High grade-Low grade
BC_S29	GPL6947	GSE32894	GSM814134	Bladder cancer	Urothelial carcinoma	Low grade	High grade-Low grade
BC_S29	GPL6947	GSE32894	GSM814135	Bladder cancer	Urothelial carcinoma	Low grade	High grade-Low grade
BC_S29	GPL6947	GSE32894	GSM814136	Bladder cancer	Urothelial carcinoma	Low grade	High grade-Low grade
BC_S29	GPL6947	GSE32894	GSM814137	Bladder cancer	Urothelial carcinoma	Low grade	High grade-Low grade
BC_S29	GPL6947	GSE32894	GSM814138	Bladder cancer	Urothelial carcinoma	High grade	High grade-Low grade
BC_S29	GPL6947	GSE32894	GSM814139	Bladder cancer	Urothelial carcinoma	High grade	High grade-Low grade
BC_S29	GPL6947	GSE32894	GSM814140	Bladder cancer	Urothelial carcinoma	High grade	High grade-Low grade
BC_S29	GPL6947	GSE32894	GSM814141	Bladder cancer	Urothelial carcinoma	High grade	High grade-Low grade
BC_S29	GPL6947	GSE32894	GSM814142	Bladder cancer	Urothelial carcinoma	High grade	High grade-Low grade
BC_S29	GPL6947	GSE32894	GSM814143	Bladder cancer	Urothelial carcinoma	Low grade	High grade-Low grade
BC_S29	GPL6947	GSE32894	GSM814144	Bladder cancer	Urothelial carcinoma	High grade	High grade-Low grade
BC_S29	GPL6947	GSE32894	GSM814145	Bladder cancer	Urothelial carcinoma	High grade	High grade-Low grade
BC_S29	GPL6947	GSE32894	GSM814146	Bladder cancer	Urothelial carcinoma	High grade	High grade-Low grade
BC_S29	GPL6947	GSE32894	GSM814147	Bladder cancer	Urothelial carcinoma	Low grade	High grade-Low grade
BC_S29	GPL6947	GSE32894	GSM814148	Bladder cancer	Urothelial carcinoma	High grade	High grade-Low grade
BC_S29	GPL6947	GSE32894	GSM814149	Bladder cancer	Urothelial carcinoma	High grade	High grade-Low grade
BC_S29	GPL6947	GSE32894	GSM814150	Bladder cancer	Urothelial carcinoma	Low grade	High grade-Low grade
BC_S29	GPL6947	GSE32894	GSM814151	Bladder cancer	Urothelial carcinoma	High grade	High grade-Low grade
BC_S29	GPL6947	GSE32894	GSM814152	Bladder cancer	Urothelial carcinoma	Low grade	High grade-Low grade
BC_S29	GPL6947	GSE32894	GSM814153	Bladder cancer	Urothelial carcinoma	Low grade	High grade-Low grade
BC_S29	GPL6947	GSE32894	GSM814154	Bladder cancer	Urothelial carcinoma	Low grade	High grade-Low grade
BC_S29	GPL6947	GSE32894	GSM814155	Bladder cancer	Urothelial carcinoma	Low grade	High grade-Low grade
BC_S29	GPL6947	GSE32894	GSM814156	Bladder cancer	Urothelial carcinoma	Low grade	High grade-Low grade
BC_S29	GPL6947	GSE32894	GSM814157	Bladder cancer	Urothelial carcinoma	Low grade	High grade-Low grade
BC_S29	GPL6947	GSE32894	GSM814158	Bladder cancer	Urothelial carcinoma	High grade	High grade-Low grade
BC_S29	GPL6947	GSE32894	GSM814159	Bladder cancer	Urothelial carcinoma	High grade	High grade-Low grade
BC_S29	GPL6947	GSE32894	GSM814160	Bladder cancer	Urothelial carcinoma	Low grade	High grade-Low grade
BC_S29	GPL6947	GSE32894	GSM814161	Bladder cancer	Urothelial carcinoma	High grade	High grade-Low grade
BC_S29	GPL6947	GSE32894	GSM814162	Bladder cancer	Urothelial carcinoma	Low grade	High grade-Low grade
BC_S29	GPL6947	GSE32894	GSM814163	Bladder cancer	Urothelial carcinoma	High grade	High grade-Low grade
BC_S29	GPL6947	GSE32894	GSM814164	Bladder cancer	Urothelial carcinoma	Low grade	High grade-Low grade
BC_S29	GPL6947	GSE32894	GSM814165	Bladder cancer	Urothelial carcinoma	High grade	High grade-Low grade
BC_S29	GPL6947	GSE32894	GSM814166	Bladder cancer	Urothelial carcinoma	Low grade	High grade-Low grade
BC_S29	GPL6947	GSE32894	GSM814167	Bladder cancer	Urothelial carcinoma	Low grade	High grade-Low grade
BC_S29	GPL6947	GSE32894	GSM814168	Bladder cancer	Urothelial carcinoma	High grade	High grade-Low grade
BC_S29	GPL6947	GSE32894	GSM814169	Bladder cancer	Urothelial carcinoma	High grade	High grade-Low grade
BC_S29	GPL6947	GSE32894	GSM814170	Bladder cancer	Urothelial carcinoma	High grade	High grade-Low grade
BC_S29	GPL6947	GSE32894	GSM814171	Bladder cancer	Urothelial carcinoma	Low grade	High grade-Low grade
BC_S29	GPL6947	GSE32894	GSM814172	Bladder cancer	Urothelial carcinoma	Low grade	High grade-Low grade
BC_S29	GPL6947	GSE32894	GSM814173	Bladder cancer	Urothelial carcinoma	High grade	High grade-Low grade
BC_S29	GPL6947	GSE32894	GSM814174	Bladder cancer	Urothelial carcinoma	Low grade	High grade-Low grade
BC_S29	GPL6947	GSE32894	GSM814175	Bladder cancer	Urothelial carcinoma	Low grade	High grade-Low grade
BC_S29	GPL6947	GSE32894	GSM814176	Bladder cancer	Urothelial carcinoma	High grade	High grade-Low grade
BC_S29	GPL6947	GSE32894	GSM814177	Bladder cancer	Urothelial carcinoma	High grade	High grade-Low grade
BC_S29	GPL6947	GSE32894	GSM814178	Bladder cancer	Urothelial carcinoma	High grade	High grade-Low grade
BC_S29	GPL6947	GSE32894	GSM814179	Bladder cancer	Urothelial carcinoma	High grade	High grade-Low grade
BC_S29	GPL6947	GSE32894	GSM814180	Bladder cancer	Urothelial carcinoma	Low grade	High grade-Low grade
BC_S29	GPL6947	GSE32894	GSM814181	Bladder cancer	Urothelial carcinoma	High grade	High grade-Low grade
BC_S29	GPL6947	GSE32894	GSM814182	Bladder cancer	Urothelial carcinoma	High grade	High grade-Low grade
BC_S29	GPL6947	GSE32894	GSM814183	Bladder cancer	Urothelial carcinoma	Low grade	High grade-Low grade
BC_S29	GPL6947	GSE32894	GSM814184	Bladder cancer	Urothelial carcinoma	High grade	High grade-Low grade
BC_S29	GPL6947	GSE32894	GSM814185	Bladder cancer	Urothelial carcinoma	Low grade	High grade-Low grade
BC_S29	GPL6947	GSE32894	GSM814186	Bladder cancer	Urothelial carcinoma	Low grade	High grade-Low grade
BC_S29	GPL6947	GSE32894	GSM814187	Bladder cancer	Urothelial carcinoma	High grade	High grade-Low grade
BC_S29	GPL6947	GSE32894	GSM814188	Bladder cancer	Urothelial carcinoma	High grade	High grade-Low grade
BC_S29	GPL6947	GSE32894	GSM814189	Bladder cancer	Urothelial carcinoma	High grade	High grade-Low grade
BC_S29	GPL6947	GSE32894	GSM814190	Bladder cancer	Urothelial carcinoma	Low grade	High grade-Low grade
BC_S29	GPL6947	GSE32894	GSM814191	Bladder cancer	Urothelial carcinoma	Low grade	High grade-Low grade
BC_S29	GPL6947	GSE32894	GSM814192	Bladder cancer	Urothelial carcinoma	High grade	High grade-Low grade
BC_S29	GPL6947	GSE32894	GSM814193	Bladder cancer	Urothelial carcinoma	Low grade	High grade-Low grade
BC_S29	GPL6947	GSE32894	GSM814194	Bladder cancer	Urothelial carcinoma	Low grade	High grade-Low grade
BC_S29	GPL6947	GSE32894	GSM814195	Bladder cancer	Urothelial carcinoma	High grade	High grade-Low grade
BC_S29	GPL6947	GSE32894	GSM814196	Bladder cancer	Urothelial carcinoma	Low grade	High grade-Low grade
BC_S29	GPL6947	GSE32894	GSM814197	Bladder cancer	Urothelial carcinoma	High grade	High grade-Low grade
BC_S29	GPL6947	GSE32894	GSM814198	Bladder cancer	Urothelial carcinoma	High grade	High grade-Low grade
BC_S29	GPL6947	GSE32894	GSM814199	Bladder cancer	Urothelial carcinoma	High grade	High grade-Low grade
BC_S29	GPL6947	GSE32894	GSM814200	Bladder cancer	Urothelial carcinoma	Low grade	High grade-Low grade
BC_S29	GPL6947	GSE32894	GSM814201	Bladder cancer	Urothelial carcinoma	Low grade	High grade-Low grade
BC_S29	GPL6947	GSE32894	GSM814202	Bladder cancer	Urothelial carcinoma	High grade	High grade-Low grade
BC_S29	GPL6947	GSE32894	GSM814203	Bladder cancer	Urothelial carcinoma	Low grade	High grade-Low grade
BC_S29	GPL6947	GSE32894	GSM814204	Bladder cancer	Urothelial carcinoma	High grade	High grade-Low grade
BC_S29	GPL6947	GSE32894	GSM814205	Bladder cancer	Urothelial carcinoma	Low grade	High grade-Low grade
BC_S29	GPL6947	GSE32894	GSM814206	Bladder cancer	Urothelial carcinoma	High grade	High grade-Low grade
BC_S29	GPL6947	GSE32894	GSM814207	Bladder cancer	Urothelial carcinoma	Low grade	High grade-Low grade
BC_S29	GPL6947	GSE32894	GSM814208	Bladder cancer	Urothelial carcinoma	Low grade	High grade-Low grade
BC_S29	GPL6947	GSE32894	GSM814209	Bladder cancer	Urothelial carcinoma	High grade	High grade-Low grade
BC_S29	GPL6947	GSE32894	GSM814210	Bladder cancer	Urothelial carcinoma	Low grade	High grade-Low grade
BC_S29	GPL6947	GSE32894	GSM814211	Bladder cancer	Urothelial carcinoma	Low grade	High grade-Low grade
BC_S29	GPL6947	GSE32894	GSM814212	Bladder cancer	Urothelial carcinoma	Low grade	High grade-Low grade
BC_S29	GPL6947	GSE32894	GSM814213	Bladder cancer	Urothelial carcinoma	Low grade	High grade-Low grade
BC_S29	GPL6947	GSE32894	GSM814214	Bladder cancer	Urothelial carcinoma	Low grade	High grade-Low grade
BC_S29	GPL6947	GSE32894	GSM814215	Bladder cancer	Urothelial carcinoma	Low grade	High grade-Low grade
BC_S29	GPL6947	GSE32894	GSM814216	Bladder cancer	Urothelial carcinoma	High grade	High grade-Low grade
BC_S29	GPL6947	GSE32894	GSM814217	Bladder cancer	Urothelial carcinoma	Low grade	High grade-Low grade
BC_S29	GPL6947	GSE32894	GSM814218	Bladder cancer	Urothelial carcinoma	High grade	High grade-Low grade
BC_S29	GPL6947	GSE32894	GSM814219	Bladder cancer	Urothelial carcinoma	High grade	High grade-Low grade
BC_S29	GPL6947	GSE32894	GSM814220	Bladder cancer	Urothelial carcinoma	High grade	High grade-Low grade
BC_S29	GPL6947	GSE32894	GSM814221	Bladder cancer	Urothelial carcinoma	Low grade	High grade-Low grade
BC_S29	GPL6947	GSE32894	GSM814222	Bladder cancer	Urothelial carcinoma	High grade	High grade-Low grade
BC_S29	GPL6947	GSE32894	GSM814223	Bladder cancer	Urothelial carcinoma	High grade	High grade-Low grade
BC_S29	GPL6947	GSE32894	GSM814224	Bladder cancer	Urothelial carcinoma	Low grade	High grade-Low grade
BC_S29	GPL6947	GSE32894	GSM814226	Bladder cancer	Urothelial carcinoma	Low grade	High grade-Low grade
BC_S29	GPL6947	GSE32894	GSM814227	Bladder cancer	Urothelial carcinoma	High grade	High grade-Low grade
BC_S29	GPL6947	GSE32894	GSM814228	Bladder cancer	Urothelial carcinoma	Low grade	High grade-Low grade
BC_S29	GPL6947	GSE32894	GSM814229	Bladder cancer	Urothelial carcinoma	Low grade	High grade-Low grade
BC_S29	GPL6947	GSE32894	GSM814230	Bladder cancer	Urothelial carcinoma	High grade	High grade-Low grade
BC_S29	GPL6947	GSE32894	GSM814231	Bladder cancer	Urothelial carcinoma	Low grade	High grade-Low grade
BC_S29	GPL6947	GSE32894	GSM814232	Bladder cancer	Urothelial carcinoma	High grade	High grade-Low grade
BC_S29	GPL6947	GSE32894	GSM814233	Bladder cancer	Urothelial carcinoma	Low grade	High grade-Low grade
BC_S29	GPL6947	GSE32894	GSM814234	Bladder cancer	Urothelial carcinoma	Low grade	High grade-Low grade
BC_S29	GPL6947	GSE32894	GSM814235	Bladder cancer	Urothelial carcinoma	High grade	High grade-Low grade
BC_S29	GPL6947	GSE32894	GSM814236	Bladder cancer	Urothelial carcinoma	High grade	High grade-Low grade
BC_S29	GPL6947	GSE32894	GSM814237	Bladder cancer	Urothelial carcinoma	High grade	High grade-Low grade
BC_S29	GPL6947	GSE32894	GSM814238	Bladder cancer	Urothelial carcinoma	High grade	High grade-Low grade
BC_S29	GPL6947	GSE32894	GSM814239	Bladder cancer	Urothelial carcinoma	High grade	High grade-Low grade
BC_S29	GPL6947	GSE32894	GSM814240	Bladder cancer	Urothelial carcinoma	High grade	High grade-Low grade
BC_S29	GPL6947	GSE32894	GSM814241	Bladder cancer	Urothelial carcinoma	High grade	High grade-Low grade
BC_S29	GPL6947	GSE32894	GSM814242	Bladder cancer	Urothelial carcinoma	High grade	High grade-Low grade
BC_S29	GPL6947	GSE32894	GSM814243	Bladder cancer	Urothelial carcinoma	High grade	High grade-Low grade
BC_S29	GPL6947	GSE32894	GSM814244	Bladder cancer	Urothelial carcinoma	High grade	High grade-Low grade
BC_S29	GPL6947	GSE32894	GSM814245	Bladder cancer	Urothelial carcinoma	High grade	High grade-Low grade
BC_S29	GPL6947	GSE32894	GSM814246	Bladder cancer	Urothelial carcinoma	High grade	High grade-Low grade
BC_S29	GPL6947	GSE32894	GSM814247	Bladder cancer	Urothelial carcinoma	Low grade	High grade-Low grade
BC_S29	GPL6947	GSE32894	GSM814248	Bladder cancer	Urothelial carcinoma	High grade	High grade-Low grade
BC_S29	GPL6947	GSE32894	GSM814249	Bladder cancer	Urothelial carcinoma	Low grade	High grade-Low grade
BC_S29	GPL6947	GSE32894	GSM814250	Bladder cancer	Urothelial carcinoma	Low grade	High grade-Low grade
BC_S29	GPL6947	GSE32894	GSM814251	Bladder cancer	Urothelial carcinoma	High grade	High grade-Low grade
BC_S29	GPL6947	GSE32894	GSM814252	Bladder cancer	Urothelial carcinoma	Low grade	High grade-Low grade
BC_S29	GPL6947	GSE32894	GSM814253	Bladder cancer	Urothelial carcinoma	Low grade	High grade-Low grade
BC_S29	GPL6947	GSE32894	GSM814254	Bladder cancer	Urothelial carcinoma	High grade	High grade-Low grade
BC_S29	GPL6947	GSE32894	GSM814255	Bladder cancer	Urothelial carcinoma	Low grade	High grade-Low grade
BC_S29	GPL6947	GSE32894	GSM814256	Bladder cancer	Urothelial carcinoma	Low grade	High grade-Low grade
BC_S29	GPL6947	GSE32894	GSM814257	Bladder cancer	Urothelial carcinoma	Low grade	High grade-Low grade
BC_S29	GPL6947	GSE32894	GSM814258	Bladder cancer	Urothelial carcinoma	High grade	High grade-Low grade
BC_S29	GPL6947	GSE32894	GSM814259	Bladder cancer	Urothelial carcinoma	High grade	High grade-Low grade
BC_S29	GPL6947	GSE32894	GSM814260	Bladder cancer	Urothelial carcinoma	Low grade	High grade-Low grade
BC_S29	GPL6947	GSE32894	GSM814261	Bladder cancer	Urothelial carcinoma	Low grade	High grade-Low grade
BC_S29	GPL6947	GSE32894	GSM814262	Bladder cancer	Urothelial carcinoma	High grade	High grade-Low grade
BC_S29	GPL6947	GSE32894	GSM814263	Bladder cancer	Urothelial carcinoma	Low grade	High grade-Low grade
BC_S29	GPL6947	GSE32894	GSM814264	Bladder cancer	Urothelial carcinoma	Low grade	High grade-Low grade
BC_S29	GPL6947	GSE32894	GSM814265	Bladder cancer	Urothelial carcinoma	High grade	High grade-Low grade
BC_S29	GPL6947	GSE32894	GSM814266	Bladder cancer	Urothelial carcinoma	Low grade	High grade-Low grade
BC_S29	GPL6947	GSE32894	GSM814267	Bladder cancer	Urothelial carcinoma	Low grade	High grade-Low grade
BC_S29	GPL6947	GSE32894	GSM814268	Bladder cancer	Urothelial carcinoma	High grade	High grade-Low grade
BC_S29	GPL6947	GSE32894	GSM814269	Bladder cancer	Urothelial carcinoma	High grade	High grade-Low grade
BC_S29	GPL6947	GSE32894	GSM814270	Bladder cancer	Urothelial carcinoma	High grade	High grade-Low grade
BC_S29	GPL6947	GSE32894	GSM814271	Bladder cancer	Urothelial carcinoma	Low grade	High grade-Low grade
BC_S29	GPL6947	GSE32894	GSM814272	Bladder cancer	Urothelial carcinoma	Low grade	High grade-Low grade
BC_S29	GPL6947	GSE32894	GSM814273	Bladder cancer	Urothelial carcinoma	Low grade	High grade-Low grade
BC_S29	GPL6947	GSE32894	GSM814274	Bladder cancer	Urothelial carcinoma	Low grade	High grade-Low grade
BC_S29	GPL6947	GSE32894	GSM814275	Bladder cancer	Urothelial carcinoma	High grade	High grade-Low grade
BC_S29	GPL6947	GSE32894	GSM814276	Bladder cancer	Urothelial carcinoma	Low grade	High grade-Low grade
BC_S29	GPL6947	GSE32894	GSM814277	Bladder cancer	Urothelial carcinoma	High grade	High grade-Low grade
BC_S29	GPL6947	GSE32894	GSM814278	Bladder cancer	Urothelial carcinoma	High grade	High grade-Low grade
BC_S29	GPL6947	GSE32894	GSM814279	Bladder cancer	Urothelial carcinoma	High grade	High grade-Low grade
BC_S29	GPL6947	GSE32894	GSM814280	Bladder cancer	Urothelial carcinoma	High grade	High grade-Low grade
BC_S29	GPL6947	GSE32894	GSM814281	Bladder cancer	Urothelial carcinoma	Low grade	High grade-Low grade
BC_S29	GPL6947	GSE32894	GSM814282	Bladder cancer	Urothelial carcinoma	Low grade	High grade-Low grade
BC_S29	GPL6947	GSE32894	GSM814283	Bladder cancer	Urothelial carcinoma	High grade	High grade-Low grade
BC_S29	GPL6947	GSE32894	GSM814284	Bladder cancer	Urothelial carcinoma	High grade	High grade-Low grade
BC_S29	GPL6947	GSE32894	GSM814285	Bladder cancer	Urothelial carcinoma	Low grade	High grade-Low grade
BC_S29	GPL6947	GSE32894	GSM814286	Bladder cancer	Urothelial carcinoma	Low grade	High grade-Low grade
BC_S29	GPL6947	GSE32894	GSM814287	Bladder cancer	Urothelial carcinoma	High grade	High grade-Low grade
BC_S29	GPL6947	GSE32894	GSM814288	Bladder cancer	Urothelial carcinoma	Low grade	High grade-Low grade
BC_S29	GPL6947	GSE32894	GSM814289	Bladder cancer	Urothelial carcinoma	High grade	High grade-Low grade
BC_S29	GPL6947	GSE32894	GSM814290	Bladder cancer	Urothelial carcinoma	Low grade	High grade-Low grade
BC_S29	GPL6947	GSE32894	GSM814291	Bladder cancer	Urothelial carcinoma	High grade	High grade-Low grade
BC_S29	GPL6947	GSE32894	GSM814292	Bladder cancer	Urothelial carcinoma	High grade	High grade-Low grade
BC_S29	GPL6947	GSE32894	GSM814293	Bladder cancer	Urothelial carcinoma	High grade	High grade-Low grade
BC_S29	GPL6947	GSE32894	GSM814294	Bladder cancer	Urothelial carcinoma	High grade	High grade-Low grade
BC_S29	GPL6947	GSE32894	GSM814295	Bladder cancer	Urothelial carcinoma	High grade	High grade-Low grade
BC_S29	GPL6947	GSE32894	GSM814296	Bladder cancer	Urothelial carcinoma	Low grade	High grade-Low grade
BC_S29	GPL6947	GSE32894	GSM814297	Bladder cancer	Urothelial carcinoma	Low grade	High grade-Low grade
BC_S29	GPL6947	GSE32894	GSM814298	Bladder cancer	Urothelial carcinoma	High grade	High grade-Low grade
BC_S29	GPL6947	GSE32894	GSM814299	Bladder cancer	Urothelial carcinoma	High grade	High grade-Low grade
BC_S29	GPL6947	GSE32894	GSM814300	Bladder cancer	Urothelial carcinoma	High grade	High grade-Low grade
BC_S29	GPL6947	GSE32894	GSM814301	Bladder cancer	Urothelial carcinoma	Low grade	High grade-Low grade
BC_S29	GPL6947	GSE32894	GSM814302	Bladder cancer	Urothelial carcinoma	High grade	High grade-Low grade
BC_S29	GPL6947	GSE32894	GSM814303	Bladder cancer	Urothelial carcinoma	High grade	High grade-Low grade
BC_S29	GPL6947	GSE32894	GSM814304	Bladder cancer	Urothelial carcinoma	Low grade	High grade-Low grade
BC_S29	GPL6947	GSE32894	GSM814305	Bladder cancer	Urothelial carcinoma	Low grade	High grade-Low grade
BC_S29	GPL6947	GSE32894	GSM814306	Bladder cancer	Urothelial carcinoma	Low grade	High grade-Low grade
BC_S29	GPL6947	GSE32894	GSM814307	Bladder cancer	Urothelial carcinoma	High grade	High grade-Low grade
BC_S29	GPL6947	GSE32894	GSM814308	Bladder cancer	Urothelial carcinoma	Low grade	High grade-Low grade
BC_S29	GPL6947	GSE32894	GSM814309	Bladder cancer	Urothelial carcinoma	Low grade	High grade-Low grade
BC_S29	GPL6947	GSE32894	GSM814310	Bladder cancer	Urothelial carcinoma	High grade	High grade-Low grade
BC_S29	GPL6947	GSE32894	GSM814311	Bladder cancer	Urothelial carcinoma	High grade	High grade-Low grade
BC_S29	GPL6947	GSE32894	GSM814312	Bladder cancer	Urothelial carcinoma	Low grade	High grade-Low grade
BC_S29	GPL6947	GSE32894	GSM814313	Bladder cancer	Urothelial carcinoma	High grade	High grade-Low grade
BC_S29	GPL6947	GSE32894	GSM814314	Bladder cancer	Urothelial carcinoma	Low grade	High grade-Low grade
BC_S29	GPL6947	GSE32894	GSM814315	Bladder cancer	Urothelial carcinoma	High grade	High grade-Low grade
BC_S29	GPL6947	GSE32894	GSM814316	Bladder cancer	Urothelial carcinoma	High grade	High grade-Low grade
BC_S29	GPL6947	GSE32894	GSM814317	Bladder cancer	Urothelial carcinoma	High grade	High grade-Low grade
BC_S29	GPL6947	GSE32894	GSM814318	Bladder cancer	Urothelial carcinoma	Low grade	High grade-Low grade
BC_S29	GPL6947	GSE32894	GSM814319	Bladder cancer	Urothelial carcinoma	High grade	High grade-Low grade
BC_S29	GPL6947	GSE32894	GSM814320	Bladder cancer	Urothelial carcinoma	Low grade	High grade-Low grade
BC_S29	GPL6947	GSE32894	GSM814321	Bladder cancer	Urothelial carcinoma	Low grade	High grade-Low grade
BC_S29	GPL6947	GSE32894	GSM814322	Bladder cancer	Urothelial carcinoma	Low grade	High grade-Low grade
BC_S29	GPL6947	GSE32894	GSM814323	Bladder cancer	Urothelial carcinoma	Low grade	High grade-Low grade
BC_S29	GPL6947	GSE32894	GSM814324	Bladder cancer	Urothelial carcinoma	Low grade	High grade-Low grade
BC_S29	GPL6947	GSE32894	GSM814325	Bladder cancer	Urothelial carcinoma	High grade	High grade-Low grade
BC_S29	GPL6947	GSE32894	GSM814326	Bladder cancer	Urothelial carcinoma	Low grade	High grade-Low grade
BC_S29	GPL6947	GSE32894	GSM814327	Bladder cancer	Urothelial carcinoma	Low grade	High grade-Low grade
BC_S29	GPL6947	GSE32894	GSM814328	Bladder cancer	Urothelial carcinoma	Low grade	High grade-Low grade
BC_S29	GPL6947	GSE32894	GSM814329	Bladder cancer	Urothelial carcinoma	Low grade	High grade-Low grade
BC_S29	GPL6947	GSE32894	GSM814330	Bladder cancer	Urothelial carcinoma	Low grade	High grade-Low grade
BC_S29	GPL6947	GSE32894	GSM814331	Bladder cancer	Urothelial carcinoma	Low grade	High grade-Low grade
BC_S29	GPL6947	GSE32894	GSM814332	Bladder cancer	Urothelial carcinoma	High grade	High grade-Low grade
BC_S29	GPL6947	GSE32894	GSM814333	Bladder cancer	Urothelial carcinoma	Low grade	High grade-Low grade
BC_S29	GPL6947	GSE32894	GSM814334	Bladder cancer	Urothelial carcinoma	High grade	High grade-Low grade
BC_S29	GPL6947	GSE32894	GSM814335	Bladder cancer	Urothelial carcinoma	High grade	High grade-Low grade
BC_S29	GPL6947	GSE32894	GSM814336	Bladder cancer	Urothelial carcinoma	Low grade	High grade-Low grade
BC_S29	GPL6947	GSE32894	GSM814337	Bladder cancer	Urothelial carcinoma	Low grade	High grade-Low grade
BC_S29	GPL6947	GSE32894	GSM814338	Bladder cancer	Urothelial carcinoma	Low grade	High grade-Low grade
BC_S29	GPL6947	GSE32894	GSM814339	Bladder cancer	Urothelial carcinoma	High grade	High grade-Low grade
BC_S29	GPL6947	GSE32894	GSM814340	Bladder cancer	Urothelial carcinoma	Low grade	High grade-Low grade
BC_S29	GPL6947	GSE32894	GSM814341	Bladder cancer	Urothelial carcinoma	High grade	High grade-Low grade
BC_S29	GPL6947	GSE32894	GSM814342	Bladder cancer	Urothelial carcinoma	Low grade	High grade-Low grade
BC_S29	GPL6947	GSE32894	GSM814343	Bladder cancer	Urothelial carcinoma	Low grade	High grade-Low grade
BC_S29	GPL6947	GSE32894	GSM814344	Bladder cancer	Urothelial carcinoma	High grade	High grade-Low grade
BC_S29	GPL6947	GSE32894	GSM814345	Bladder cancer	Urothelial carcinoma	Low grade	High grade-Low grade
BC_S29	GPL6947	GSE32894	GSM814346	Bladder cancer	Urothelial carcinoma	Low grade	High grade-Low grade
BC_S29	GPL6947	GSE32894	GSM814347	Bladder cancer	Urothelial carcinoma	High grade	High grade-Low grade
BC_S29	GPL6947	GSE32894	GSM814348	Bladder cancer	Urothelial carcinoma	Low grade	High grade-Low grade
BC_S29	GPL6947	GSE32894	GSM814349	Bladder cancer	Urothelial carcinoma	Low grade	High grade-Low grade
BC_S29	GPL6947	GSE32894	GSM814350	Bladder cancer	Urothelial carcinoma	High grade	High grade-Low grade
BC_S29	GPL6947	GSE32894	GSM814351	Bladder cancer	Urothelial carcinoma	Low grade	High grade-Low grade
BC_S29	GPL6947	GSE32894	GSM814352	Bladder cancer	Urothelial carcinoma	High grade	High grade-Low grade
BC_S29	GPL6947	GSE32894	GSM814353	Bladder cancer	Urothelial carcinoma	High grade	High grade-Low grade
BC_S29	GPL6947	GSE32894	GSM814354	Bladder cancer	Urothelial carcinoma	High grade	High grade-Low grade
BC_S29	GPL6947	GSE32894	GSM814355	Bladder cancer	Urothelial carcinoma	Low grade	High grade-Low grade
BC_S29	GPL6947	GSE32894	GSM814356	Bladder cancer	Urothelial carcinoma	High grade	High grade-Low grade
BC_S29	GPL6947	GSE32894	GSM814357	Bladder cancer	Urothelial carcinoma	High grade	High grade-Low grade
BC_S29	GPL6947	GSE32894	GSM814358	Bladder cancer	Urothelial carcinoma	Low grade	High grade-Low grade
BC_S29	GPL6947	GSE32894	GSM814359	Bladder cancer	Urothelial carcinoma	High grade	High grade-Low grade
BC_S31	GPL570	GSE31684	GSM786491	Bladder cancer	Urothelial carcinoma	High grade	High grade-Low grade
BC_S31	GPL570	GSE31684	GSM786492	Bladder cancer	Urothelial carcinoma	High grade	High grade-Low grade
BC_S31	GPL570	GSE31684	GSM786493	Bladder cancer	Urothelial carcinoma	High grade	High grade-Low grade
BC_S31	GPL570	GSE31684	GSM786494	Bladder cancer	Urothelial carcinoma	High grade	High grade-Low grade
BC_S31	GPL570	GSE31684	GSM786495	Bladder cancer	Urothelial carcinoma	High grade	High grade-Low grade
BC_S31	GPL570	GSE31684	GSM786496	Bladder cancer	Urothelial carcinoma	High grade	High grade-Low grade
BC_S31	GPL570	GSE31684	GSM786497	Bladder cancer	Urothelial carcinoma	High grade	High grade-Low grade
BC_S31	GPL570	GSE31684	GSM786498	Bladder cancer	Urothelial carcinoma	High grade	High grade-Low grade
BC_S31	GPL570	GSE31684	GSM786499	Bladder cancer	Urothelial carcinoma	High grade	High grade-Low grade
BC_S31	GPL570	GSE31684	GSM786500	Bladder cancer	Urothelial carcinoma	High grade	High grade-Low grade
BC_S31	GPL570	GSE31684	GSM786501	Bladder cancer	Urothelial carcinoma	Low grade	High grade-Low grade
BC_S31	GPL570	GSE31684	GSM786502	Bladder cancer	Urothelial carcinoma	High grade	High grade-Low grade
BC_S31	GPL570	GSE31684	GSM786503	Bladder cancer	Urothelial carcinoma	High grade	High grade-Low grade
BC_S31	GPL570	GSE31684	GSM786504	Bladder cancer	Urothelial carcinoma	High grade	High grade-Low grade
BC_S31	GPL570	GSE31684	GSM786505	Bladder cancer	Urothelial carcinoma	High grade	High grade-Low grade
BC_S31	GPL570	GSE31684	GSM786506	Bladder cancer	Urothelial carcinoma	High grade	High grade-Low grade
BC_S31	GPL570	GSE31684	GSM786507	Bladder cancer	Urothelial carcinoma	High grade	High grade-Low grade
BC_S31	GPL570	GSE31684	GSM786508	Bladder cancer	Urothelial carcinoma	High grade	High grade-Low grade
BC_S31	GPL570	GSE31684	GSM786509	Bladder cancer	Urothelial carcinoma	High grade	High grade-Low grade
BC_S31	GPL570	GSE31684	GSM786510	Bladder cancer	Urothelial carcinoma	High grade	High grade-Low grade
BC_S31	GPL570	GSE31684	GSM786511	Bladder cancer	Urothelial carcinoma	High grade	High grade-Low grade
BC_S31	GPL570	GSE31684	GSM786512	Bladder cancer	Urothelial carcinoma	High grade	High grade-Low grade
BC_S31	GPL570	GSE31684	GSM786513	Bladder cancer	Urothelial carcinoma	High grade	High grade-Low grade
BC_S31	GPL570	GSE31684	GSM786514	Bladder cancer	Urothelial carcinoma	High grade	High grade-Low grade
BC_S31	GPL570	GSE31684	GSM786515	Bladder cancer	Urothelial carcinoma	High grade	High grade-Low grade
BC_S31	GPL570	GSE31684	GSM786516	Bladder cancer	Urothelial carcinoma	High grade	High grade-Low grade
BC_S31	GPL570	GSE31684	GSM786517	Bladder cancer	Urothelial carcinoma	High grade	High grade-Low grade
BC_S31	GPL570	GSE31684	GSM786518	Bladder cancer	Urothelial carcinoma	High grade	High grade-Low grade
BC_S31	GPL570	GSE31684	GSM786519	Bladder cancer	Urothelial carcinoma	High grade	High grade-Low grade
BC_S31	GPL570	GSE31684	GSM786520	Bladder cancer	Urothelial carcinoma	High grade	High grade-Low grade
BC_S31	GPL570	GSE31684	GSM786521	Bladder cancer	Urothelial carcinoma	High grade	High grade-Low grade
BC_S31	GPL570	GSE31684	GSM786522	Bladder cancer	Urothelial carcinoma	High grade	High grade-Low grade
BC_S31	GPL570	GSE31684	GSM786523	Bladder cancer	Urothelial carcinoma	Low grade	High grade-Low grade
BC_S31	GPL570	GSE31684	GSM786524	Bladder cancer	Urothelial carcinoma	High grade	High grade-Low grade
BC_S31	GPL570	GSE31684	GSM786525	Bladder cancer	Urothelial carcinoma	High grade	High grade-Low grade
BC_S31	GPL570	GSE31684	GSM786526	Bladder cancer	Urothelial carcinoma	High grade	High grade-Low grade
BC_S31	GPL570	GSE31684	GSM786527	Bladder cancer	Urothelial carcinoma	High grade	High grade-Low grade
BC_S31	GPL570	GSE31684	GSM786528	Bladder cancer	Urothelial carcinoma	High grade	High grade-Low grade
BC_S31	GPL570	GSE31684	GSM786529	Bladder cancer	Urothelial carcinoma	High grade	High grade-Low grade
BC_S31	GPL570	GSE31684	GSM786530	Bladder cancer	Urothelial carcinoma	High grade	High grade-Low grade
BC_S31	GPL570	GSE31684	GSM786531	Bladder cancer	Urothelial carcinoma	High grade	High grade-Low grade
BC_S31	GPL570	GSE31684	GSM786532	Bladder cancer	Urothelial carcinoma	High grade	High grade-Low grade
BC_S31	GPL570	GSE31684	GSM786533	Bladder cancer	Urothelial carcinoma	High grade	High grade-Low grade
BC_S31	GPL570	GSE31684	GSM786534	Bladder cancer	Urothelial carcinoma	High grade	High grade-Low grade
BC_S31	GPL570	GSE31684	GSM786535	Bladder cancer	Urothelial carcinoma	High grade	High grade-Low grade
BC_S31	GPL570	GSE31684	GSM786536	Bladder cancer	Urothelial carcinoma	High grade	High grade-Low grade
BC_S31	GPL570	GSE31684	GSM786537	Bladder cancer	Urothelial carcinoma	High grade	High grade-Low grade
BC_S31	GPL570	GSE31684	GSM786538	Bladder cancer	Urothelial carcinoma	High grade	High grade-Low grade
BC_S31	GPL570	GSE31684	GSM786539	Bladder cancer	Urothelial carcinoma	High grade	High grade-Low grade
BC_S31	GPL570	GSE31684	GSM786540	Bladder cancer	Urothelial carcinoma	High grade	High grade-Low grade
BC_S31	GPL570	GSE31684	GSM786541	Bladder cancer	Urothelial carcinoma	High grade	High grade-Low grade
BC_S31	GPL570	GSE31684	GSM786542	Bladder cancer	Urothelial carcinoma	High grade	High grade-Low grade
BC_S31	GPL570	GSE31684	GSM786543	Bladder cancer	Urothelial carcinoma	High grade	High grade-Low grade
BC_S31	GPL570	GSE31684	GSM786544	Bladder cancer	Urothelial carcinoma	High grade	High grade-Low grade
BC_S31	GPL570	GSE31684	GSM786545	Bladder cancer	Urothelial carcinoma	High grade	High grade-Low grade
BC_S31	GPL570	GSE31684	GSM786546	Bladder cancer	Urothelial carcinoma	High grade	High grade-Low grade
BC_S31	GPL570	GSE31684	GSM786547	Bladder cancer	Urothelial carcinoma	High grade	High grade-Low grade
BC_S31	GPL570	GSE31684	GSM786548	Bladder cancer	Urothelial carcinoma	High grade	High grade-Low grade
BC_S31	GPL570	GSE31684	GSM786549	Bladder cancer	Urothelial carcinoma	High grade	High grade-Low grade
BC_S31	GPL570	GSE31684	GSM786550	Bladder cancer	Urothelial carcinoma	High grade	High grade-Low grade
BC_S31	GPL570	GSE31684	GSM786551	Bladder cancer	Urothelial carcinoma	High grade	High grade-Low grade
BC_S31	GPL570	GSE31684	GSM786552	Bladder cancer	Urothelial carcinoma	High grade	High grade-Low grade
BC_S31	GPL570	GSE31684	GSM786553	Bladder cancer	Urothelial carcinoma	High grade	High grade-Low grade
BC_S31	GPL570	GSE31684	GSM786554	Bladder cancer	Urothelial carcinoma	High grade	High grade-Low grade
BC_S31	GPL570	GSE31684	GSM786555	Bladder cancer	Urothelial carcinoma	Low grade	High grade-Low grade
BC_S31	GPL570	GSE31684	GSM786556	Bladder cancer	Urothelial carcinoma	Low grade	High grade-Low grade
BC_S31	GPL570	GSE31684	GSM786557	Bladder cancer	Urothelial carcinoma	High grade	High grade-Low grade
BC_S31	GPL570	GSE31684	GSM786558	Bladder cancer	Urothelial carcinoma	Low grade	High grade-Low grade
BC_S31	GPL570	GSE31684	GSM786559	Bladder cancer	Urothelial carcinoma	High grade	High grade-Low grade
BC_S31	GPL570	GSE31684	GSM786560	Bladder cancer	Urothelial carcinoma	High grade	High grade-Low grade
BC_S31	GPL570	GSE31684	GSM786561	Bladder cancer	Urothelial carcinoma	High grade	High grade-Low grade
BC_S31	GPL570	GSE31684	GSM786562	Bladder cancer	Urothelial carcinoma	High grade	High grade-Low grade
BC_S31	GPL570	GSE31684	GSM786563	Bladder cancer	Urothelial carcinoma	High grade	High grade-Low grade
BC_S31	GPL570	GSE31684	GSM786564	Bladder cancer	Urothelial carcinoma	High grade	High grade-Low grade
BC_S31	GPL570	GSE31684	GSM786565	Bladder cancer	Urothelial carcinoma	Low grade	High grade-Low grade
BC_S31	GPL570	GSE31684	GSM786566	Bladder cancer	Urothelial carcinoma	High grade	High grade-Low grade
BC_S31	GPL570	GSE31684	GSM786567	Bladder cancer	Urothelial carcinoma	High grade	High grade-Low grade
BC_S31	GPL570	GSE31684	GSM786568	Bladder cancer	Urothelial carcinoma	High grade	High grade-Low grade
BC_S31	GPL570	GSE31684	GSM786569	Bladder cancer	Urothelial carcinoma	High grade	High grade-Low grade
BC_S31	GPL570	GSE31684	GSM786570	Bladder cancer	Urothelial carcinoma	High grade	High grade-Low grade
BC_S31	GPL570	GSE31684	GSM786571	Bladder cancer	Urothelial carcinoma	High grade	High grade-Low grade
BC_S31	GPL570	GSE31684	GSM786572	Bladder cancer	Urothelial carcinoma	High grade	High grade-Low grade
BC_S31	GPL570	GSE31684	GSM786573	Bladder cancer	Urothelial carcinoma	High grade	High grade-Low grade
BC_S31	GPL570	GSE31684	GSM786574	Bladder cancer	Urothelial carcinoma	High grade	High grade-Low grade
BC_S31	GPL570	GSE31684	GSM786575	Bladder cancer	Urothelial carcinoma	High grade	High grade-Low grade
BC_S31	GPL570	GSE31684	GSM786576	Bladder cancer	Urothelial carcinoma	High grade	High grade-Low grade
BC_S31	GPL570	GSE31684	GSM786577	Bladder cancer	Urothelial carcinoma	High grade	High grade-Low grade
BC_S31	GPL570	GSE31684	GSM786578	Bladder cancer	Urothelial carcinoma	High grade	High grade-Low grade
BC_S31	GPL570	GSE31684	GSM786579	Bladder cancer	Urothelial carcinoma	High grade	High grade-Low grade
BC_S31	GPL570	GSE31684	GSM786580	Bladder cancer	Urothelial carcinoma	High grade	High grade-Low grade
BC_S31	GPL570	GSE31684	GSM786581	Bladder cancer	Urothelial carcinoma	High grade	High grade-Low grade
BC_S31	GPL570	GSE31684	GSM786582	Bladder cancer	Urothelial carcinoma	High grade	High grade-Low grade
BC_S31	GPL570	GSE31684	GSM786583	Bladder cancer	Urothelial carcinoma	High grade	High grade-Low grade
BC_S32	GPL6791	GSE24152	GSM594412	Bladder cancer	Urothelial carcinoma	Normal	Tumor-Normal
BC_S32	GPL6791	GSE24152	GSM594413	Bladder cancer	Urothelial carcinoma	Normal	Tumor-Normal
BC_S32	GPL6791	GSE24152	GSM594414	Bladder cancer	Urothelial carcinoma	Normal	Tumor-Normal
BC_S32	GPL6791	GSE24152	GSM594415	Bladder cancer	Urothelial carcinoma	Normal	Tumor-Normal
BC_S32	GPL6791	GSE24152	GSM594416	Bladder cancer	Urothelial carcinoma	Normal	Tumor-Normal
BC_S32	GPL6791	GSE24152	GSM594417	Bladder cancer	Urothelial carcinoma	Normal	Tumor-Normal
BC_S32	GPL6791	GSE24152	GSM594418	Bladder cancer	Urothelial carcinoma	Normal	Tumor-Normal
BC_S32	GPL6791	GSE24152	GSM594419	Bladder cancer	Urothelial carcinoma	Tumor	Tumor-Normal
BC_S32	GPL6791	GSE24152	GSM594420	Bladder cancer	Urothelial carcinoma	Tumor	Tumor-Normal
BC_S32	GPL6791	GSE24152	GSM594421	Bladder cancer	Urothelial carcinoma	Tumor	Tumor-Normal
BC_S32	GPL6791	GSE24152	GSM594422	Bladder cancer	Urothelial carcinoma	Tumor	Tumor-Normal
BC_S32	GPL6791	GSE24152	GSM594423	Bladder cancer	Urothelial carcinoma	Tumor	Tumor-Normal
BC_S32	GPL6791	GSE24152	GSM594424	Bladder cancer	Urothelial carcinoma	Tumor	Tumor-Normal
BC_S32	GPL6791	GSE24152	GSM594425	Bladder cancer	Urothelial carcinoma	Tumor	Tumor-Normal
BC_S32	GPL6791	GSE24152	GSM594426	Bladder cancer	Urothelial carcinoma	Tumor	Tumor-Normal
BC_S32	GPL6791	GSE24152	GSM594427	Bladder cancer	Urothelial carcinoma	Tumor	Tumor-Normal
BC_S32	GPL6791	GSE24152	GSM594428	Bladder cancer	Urothelial carcinoma	Tumor	Tumor-Normal
BC_S33	GPL6102	GSE13507	GSM340537	Bladder cancer	Bladder cancer	Normal	Tumor-Normal
BC_S33	GPL6102	GSE13507	GSM340538	Bladder cancer	Bladder cancer	Normal	Tumor-Normal
BC_S33	GPL6102	GSE13507	GSM340539	Bladder cancer	Bladder cancer	Normal	Tumor-Normal
BC_S33	GPL6102	GSE13507	GSM340540	Bladder cancer	Bladder cancer	Normal	Tumor-Normal
BC_S33	GPL6102	GSE13507	GSM340541	Bladder cancer	Bladder cancer	Normal	Tumor-Normal
BC_S33	GPL6102	GSE13507	GSM340542	Bladder cancer	Bladder cancer	Normal	Tumor-Normal
BC_S33	GPL6102	GSE13507	GSM340543	Bladder cancer	Bladder cancer	Normal	Tumor-Normal
BC_S33	GPL6102	GSE13507	GSM340544	Bladder cancer	Bladder cancer	Normal	Tumor-Normal
BC_S33	GPL6102	GSE13507	GSM340545	Bladder cancer	Bladder cancer	Normal	Tumor-Normal
BC_S33	GPL6102	GSE13507	GSM340546	Bladder cancer	Bladder cancer	Normal	Tumor-Normal
BC_S33	GPL6102	GSE13507	GSM340547	Bladder cancer	Bladder cancer	Normal	Tumor-Normal
BC_S33	GPL6102	GSE13507	GSM340548	Bladder cancer	Bladder cancer	Normal	Tumor-Normal
BC_S33	GPL6102	GSE13507	GSM340549	Bladder cancer	Bladder cancer	Normal	Tumor-Normal
BC_S33	GPL6102	GSE13507	GSM340550	Bladder cancer	Bladder cancer	Normal	Tumor-Normal
BC_S33	GPL6102	GSE13507	GSM340551	Bladder cancer	Bladder cancer	Normal	Tumor-Normal
BC_S33	GPL6102	GSE13507	GSM340552	Bladder cancer	Bladder cancer	Normal	Tumor-Normal
BC_S33	GPL6102	GSE13507	GSM340553	Bladder cancer	Bladder cancer	Normal	Tumor-Normal
BC_S33	GPL6102	GSE13507	GSM340554	Bladder cancer	Bladder cancer	Normal	Tumor-Normal
BC_S33	GPL6102	GSE13507	GSM340555	Bladder cancer	Bladder cancer	Normal	Tumor-Normal
BC_S33	GPL6102	GSE13507	GSM340556	Bladder cancer	Bladder cancer	Normal	Tumor-Normal
BC_S33	GPL6102	GSE13507	GSM340557	Bladder cancer	Bladder cancer	Normal	Tumor-Normal
BC_S33	GPL6102	GSE13507	GSM340558	Bladder cancer	Bladder cancer	Normal	Tumor-Normal
BC_S33	GPL6102	GSE13507	GSM340559	Bladder cancer	Bladder cancer	Normal	Tumor-Normal
BC_S33	GPL6102	GSE13507	GSM340560	Bladder cancer	Bladder cancer	Normal	Tumor-Normal
BC_S33	GPL6102	GSE13507	GSM340561	Bladder cancer	Bladder cancer	Normal	Tumor-Normal
BC_S33	GPL6102	GSE13507	GSM340562	Bladder cancer	Bladder cancer	Normal	Tumor-Normal
BC_S33	GPL6102	GSE13507	GSM340563	Bladder cancer	Bladder cancer	Normal	Tumor-Normal
BC_S33	GPL6102	GSE13507	GSM340564	Bladder cancer	Bladder cancer	Normal	Tumor-Normal
BC_S33	GPL6102	GSE13507	GSM340565	Bladder cancer	Bladder cancer	Normal	Tumor-Normal
BC_S33	GPL6102	GSE13507	GSM340566	Bladder cancer	Bladder cancer	Normal	Tumor-Normal
BC_S33	GPL6102	GSE13507	GSM340567	Bladder cancer	Bladder cancer	Normal	Tumor-Normal
BC_S33	GPL6102	GSE13507	GSM340568	Bladder cancer	Bladder cancer	Normal	Tumor-Normal
BC_S33	GPL6102	GSE13507	GSM340569	Bladder cancer	Bladder cancer	Normal	Tumor-Normal
BC_S33	GPL6102	GSE13507	GSM340570	Bladder cancer	Bladder cancer	Normal	Tumor-Normal
BC_S33	GPL6102	GSE13507	GSM340571	Bladder cancer	Bladder cancer	Normal	Tumor-Normal
BC_S33	GPL6102	GSE13507	GSM340572	Bladder cancer	Bladder cancer	Normal	Tumor-Normal
BC_S33	GPL6102	GSE13507	GSM340573	Bladder cancer	Bladder cancer	Normal	Tumor-Normal
BC_S33	GPL6102	GSE13507	GSM340574	Bladder cancer	Bladder cancer	Normal	Tumor-Normal
BC_S33	GPL6102	GSE13507	GSM340575	Bladder cancer	Bladder cancer	Normal	Tumor-Normal
BC_S33	GPL6102	GSE13507	GSM340576	Bladder cancer	Bladder cancer	Normal	Tumor-Normal
BC_S33	GPL6102	GSE13507	GSM340577	Bladder cancer	Bladder cancer	Normal	Tumor-Normal
BC_S33	GPL6102	GSE13507	GSM340578	Bladder cancer	Bladder cancer	Normal	Tumor-Normal
BC_S33	GPL6102	GSE13507	GSM340579	Bladder cancer	Bladder cancer	Normal	Tumor-Normal
BC_S33	GPL6102	GSE13507	GSM340580	Bladder cancer	Bladder cancer	Normal	Tumor-Normal
BC_S33	GPL6102	GSE13507	GSM340581	Bladder cancer	Bladder cancer	Normal	Tumor-Normal
BC_S33	GPL6102	GSE13507	GSM340582	Bladder cancer	Bladder cancer	Normal	Tumor-Normal
BC_S33	GPL6102	GSE13507	GSM340583	Bladder cancer	Bladder cancer	Normal	Tumor-Normal
BC_S33	GPL6102	GSE13507	GSM340584	Bladder cancer	Bladder cancer	Normal	Tumor-Normal
BC_S33	GPL6102	GSE13507	GSM340585	Bladder cancer	Bladder cancer	Normal	Tumor-Normal
BC_S33	GPL6102	GSE13507	GSM340586	Bladder cancer	Bladder cancer	Normal	Tumor-Normal
BC_S33	GPL6102	GSE13507	GSM340587	Bladder cancer	Bladder cancer	Normal	Tumor-Normal
BC_S33	GPL6102	GSE13507	GSM340588	Bladder cancer	Bladder cancer	Normal	Tumor-Normal
BC_S33	GPL6102	GSE13507	GSM340589	Bladder cancer	Bladder cancer	Normal	Tumor-Normal
BC_S33	GPL6102	GSE13507	GSM340590	Bladder cancer	Bladder cancer	Normal	Tumor-Normal
BC_S33	GPL6102	GSE13507	GSM340591	Bladder cancer	Bladder cancer	Normal	Tumor-Normal
BC_S33	GPL6102	GSE13507	GSM340592	Bladder cancer	Bladder cancer	Normal	Tumor-Normal
BC_S33	GPL6102	GSE13507	GSM340593	Bladder cancer	Bladder cancer	Normal	Tumor-Normal
BC_S33	GPL6102	GSE13507	GSM340594	Bladder cancer	Bladder cancer	Normal	Tumor-Normal
BC_S33	GPL6102	GSE13507	GSM340595	Bladder cancer	Bladder cancer	Normal	Tumor-Normal
BC_S33	GPL6102	GSE13507	GSM340596	Bladder cancer	Bladder cancer	Normal	Tumor-Normal
BC_S33	GPL6102	GSE13507	GSM340597	Bladder cancer	Bladder cancer	Normal	Tumor-Normal
BC_S33	GPL6102	GSE13507	GSM340598	Bladder cancer	Bladder cancer	Normal	Tumor-Normal
BC_S33	GPL6102	GSE13507	GSM340599	Bladder cancer	Bladder cancer	Normal	Tumor-Normal
BC_S33	GPL6102	GSE13507	GSM340600	Bladder cancer	Bladder cancer	Normal	Tumor-Normal
BC_S33	GPL6102	GSE13507	GSM340601	Bladder cancer	Bladder cancer	Normal	Tumor-Normal
BC_S33	GPL6102	GSE13507	GSM340602	Bladder cancer	Bladder cancer	Normal	Tumor-Normal
BC_S33	GPL6102	GSE13507	GSM340603	Bladder cancer	Bladder cancer	Normal	Tumor-Normal
BC_S33	GPL6102	GSE13507	GSM340604	Bladder cancer	Bladder cancer	Normal	Tumor-Normal
BC_S33	GPL6102	GSE13507	GSM340605	Bladder cancer	Bladder cancer	Tumor	Tumor-Normal
BC_S33	GPL6102	GSE13507	GSM340606	Bladder cancer	Bladder cancer	Tumor	Tumor-Normal
BC_S33	GPL6102	GSE13507	GSM340607	Bladder cancer	Bladder cancer	Tumor	Tumor-Normal
BC_S33	GPL6102	GSE13507	GSM340608	Bladder cancer	Bladder cancer	Tumor	Tumor-Normal
BC_S33	GPL6102	GSE13507	GSM340609	Bladder cancer	Bladder cancer	Tumor	Tumor-Normal
BC_S33	GPL6102	GSE13507	GSM340610	Bladder cancer	Bladder cancer	Tumor	Tumor-Normal
BC_S33	GPL6102	GSE13507	GSM340611	Bladder cancer	Bladder cancer	Tumor	Tumor-Normal
BC_S33	GPL6102	GSE13507	GSM340612	Bladder cancer	Bladder cancer	Tumor	Tumor-Normal
BC_S33	GPL6102	GSE13507	GSM340613	Bladder cancer	Bladder cancer	Tumor	Tumor-Normal
BC_S33	GPL6102	GSE13507	GSM340614	Bladder cancer	Bladder cancer	Tumor	Tumor-Normal
BC_S33	GPL6102	GSE13507	GSM340615	Bladder cancer	Bladder cancer	Tumor	Tumor-Normal
BC_S33	GPL6102	GSE13507	GSM340616	Bladder cancer	Bladder cancer	Tumor	Tumor-Normal
BC_S33	GPL6102	GSE13507	GSM340617	Bladder cancer	Bladder cancer	Tumor	Tumor-Normal
BC_S33	GPL6102	GSE13507	GSM340618	Bladder cancer	Bladder cancer	Tumor	Tumor-Normal
BC_S33	GPL6102	GSE13507	GSM340619	Bladder cancer	Bladder cancer	Tumor	Tumor-Normal
BC_S33	GPL6102	GSE13507	GSM340620	Bladder cancer	Bladder cancer	Tumor	Tumor-Normal
BC_S33	GPL6102	GSE13507	GSM340621	Bladder cancer	Bladder cancer	Tumor	Tumor-Normal
BC_S33	GPL6102	GSE13507	GSM340622	Bladder cancer	Bladder cancer	Tumor	Tumor-Normal
BC_S33	GPL6102	GSE13507	GSM340623	Bladder cancer	Bladder cancer	Tumor	Tumor-Normal
BC_S33	GPL6102	GSE13507	GSM340624	Bladder cancer	Bladder cancer	Tumor	Tumor-Normal
BC_S33	GPL6102	GSE13507	GSM340625	Bladder cancer	Bladder cancer	Tumor	Tumor-Normal
BC_S33	GPL6102	GSE13507	GSM340626	Bladder cancer	Bladder cancer	Tumor	Tumor-Normal
BC_S33	GPL6102	GSE13507	GSM340627	Bladder cancer	Bladder cancer	Tumor	Tumor-Normal
BC_S33	GPL6102	GSE13507	GSM340628	Bladder cancer	Bladder cancer	Tumor	Tumor-Normal
BC_S33	GPL6102	GSE13507	GSM340629	Bladder cancer	Bladder cancer	Tumor	Tumor-Normal
BC_S33	GPL6102	GSE13507	GSM340630	Bladder cancer	Bladder cancer	Tumor	Tumor-Normal
BC_S33	GPL6102	GSE13507	GSM340631	Bladder cancer	Bladder cancer	Tumor	Tumor-Normal
BC_S33	GPL6102	GSE13507	GSM340632	Bladder cancer	Bladder cancer	Tumor	Tumor-Normal
BC_S33	GPL6102	GSE13507	GSM340633	Bladder cancer	Bladder cancer	Tumor	Tumor-Normal
BC_S33	GPL6102	GSE13507	GSM340634	Bladder cancer	Bladder cancer	Tumor	Tumor-Normal
BC_S33	GPL6102	GSE13507	GSM340635	Bladder cancer	Bladder cancer	Tumor	Tumor-Normal
BC_S33	GPL6102	GSE13507	GSM340636	Bladder cancer	Bladder cancer	Tumor	Tumor-Normal
BC_S33	GPL6102	GSE13507	GSM340637	Bladder cancer	Bladder cancer	Tumor	Tumor-Normal
BC_S33	GPL6102	GSE13507	GSM340638	Bladder cancer	Bladder cancer	Tumor	Tumor-Normal
BC_S33	GPL6102	GSE13507	GSM340639	Bladder cancer	Bladder cancer	Tumor	Tumor-Normal
BC_S33	GPL6102	GSE13507	GSM340640	Bladder cancer	Bladder cancer	Tumor	Tumor-Normal
BC_S33	GPL6102	GSE13507	GSM340641	Bladder cancer	Bladder cancer	Tumor	Tumor-Normal
BC_S33	GPL6102	GSE13507	GSM340642	Bladder cancer	Bladder cancer	Tumor	Tumor-Normal
BC_S33	GPL6102	GSE13507	GSM340643	Bladder cancer	Bladder cancer	Tumor	Tumor-Normal
BC_S33	GPL6102	GSE13507	GSM340644	Bladder cancer	Bladder cancer	Tumor	Tumor-Normal
BC_S33	GPL6102	GSE13507	GSM340645	Bladder cancer	Bladder cancer	Tumor	Tumor-Normal
BC_S33	GPL6102	GSE13507	GSM340646	Bladder cancer	Bladder cancer	Tumor	Tumor-Normal
BC_S33	GPL6102	GSE13507	GSM340647	Bladder cancer	Bladder cancer	Tumor	Tumor-Normal
BC_S33	GPL6102	GSE13507	GSM340648	Bladder cancer	Bladder cancer	Tumor	Tumor-Normal
BC_S33	GPL6102	GSE13507	GSM340649	Bladder cancer	Bladder cancer	Tumor	Tumor-Normal
BC_S33	GPL6102	GSE13507	GSM340650	Bladder cancer	Bladder cancer	Tumor	Tumor-Normal
BC_S33	GPL6102	GSE13507	GSM340651	Bladder cancer	Bladder cancer	Tumor	Tumor-Normal
BC_S33	GPL6102	GSE13507	GSM340652	Bladder cancer	Bladder cancer	Tumor	Tumor-Normal
BC_S33	GPL6102	GSE13507	GSM340653	Bladder cancer	Bladder cancer	Tumor	Tumor-Normal
BC_S33	GPL6102	GSE13507	GSM340654	Bladder cancer	Bladder cancer	Tumor	Tumor-Normal
BC_S33	GPL6102	GSE13507	GSM340655	Bladder cancer	Bladder cancer	Tumor	Tumor-Normal
BC_S33	GPL6102	GSE13507	GSM340656	Bladder cancer	Bladder cancer	Tumor	Tumor-Normal
BC_S33	GPL6102	GSE13507	GSM340657	Bladder cancer	Bladder cancer	Tumor	Tumor-Normal
BC_S33	GPL6102	GSE13507	GSM340658	Bladder cancer	Bladder cancer	Tumor	Tumor-Normal
BC_S33	GPL6102	GSE13507	GSM340659	Bladder cancer	Bladder cancer	Tumor	Tumor-Normal
BC_S33	GPL6102	GSE13507	GSM340660	Bladder cancer	Bladder cancer	Tumor	Tumor-Normal
BC_S33	GPL6102	GSE13507	GSM340661	Bladder cancer	Bladder cancer	Tumor	Tumor-Normal
BC_S33	GPL6102	GSE13507	GSM340662	Bladder cancer	Bladder cancer	Tumor	Tumor-Normal
BC_S33	GPL6102	GSE13507	GSM340663	Bladder cancer	Bladder cancer	Tumor	Tumor-Normal
BC_S33	GPL6102	GSE13507	GSM340664	Bladder cancer	Bladder cancer	Tumor	Tumor-Normal
BC_S33	GPL6102	GSE13507	GSM340665	Bladder cancer	Bladder cancer	Tumor	Tumor-Normal
BC_S33	GPL6102	GSE13507	GSM340666	Bladder cancer	Bladder cancer	Tumor	Tumor-Normal
BC_S33	GPL6102	GSE13507	GSM340667	Bladder cancer	Bladder cancer	Tumor	Tumor-Normal
BC_S33	GPL6102	GSE13507	GSM340668	Bladder cancer	Bladder cancer	Tumor	Tumor-Normal
BC_S33	GPL6102	GSE13507	GSM340669	Bladder cancer	Bladder cancer	Tumor	Tumor-Normal
BC_S33	GPL6102	GSE13507	GSM340670	Bladder cancer	Bladder cancer	Tumor	Tumor-Normal
BC_S33	GPL6102	GSE13507	GSM340671	Bladder cancer	Bladder cancer	Tumor	Tumor-Normal
BC_S33	GPL6102	GSE13507	GSM340672	Bladder cancer	Bladder cancer	Tumor	Tumor-Normal
BC_S33	GPL6102	GSE13507	GSM340673	Bladder cancer	Bladder cancer	Tumor	Tumor-Normal
BC_S33	GPL6102	GSE13507	GSM340674	Bladder cancer	Bladder cancer	Tumor	Tumor-Normal
BC_S33	GPL6102	GSE13507	GSM340675	Bladder cancer	Bladder cancer	Tumor	Tumor-Normal
BC_S33	GPL6102	GSE13507	GSM340676	Bladder cancer	Bladder cancer	Tumor	Tumor-Normal
BC_S33	GPL6102	GSE13507	GSM340677	Bladder cancer	Bladder cancer	Tumor	Tumor-Normal
BC_S33	GPL6102	GSE13507	GSM340678	Bladder cancer	Bladder cancer	Tumor	Tumor-Normal
BC_S33	GPL6102	GSE13507	GSM340679	Bladder cancer	Bladder cancer	Tumor	Tumor-Normal
BC_S33	GPL6102	GSE13507	GSM340680	Bladder cancer	Bladder cancer	Tumor	Tumor-Normal
BC_S33	GPL6102	GSE13507	GSM340681	Bladder cancer	Bladder cancer	Tumor	Tumor-Normal
BC_S33	GPL6102	GSE13507	GSM340682	Bladder cancer	Bladder cancer	Tumor	Tumor-Normal
BC_S33	GPL6102	GSE13507	GSM340683	Bladder cancer	Bladder cancer	Tumor	Tumor-Normal
BC_S33	GPL6102	GSE13507	GSM340684	Bladder cancer	Bladder cancer	Tumor	Tumor-Normal
BC_S33	GPL6102	GSE13507	GSM340685	Bladder cancer	Bladder cancer	Tumor	Tumor-Normal
BC_S33	GPL6102	GSE13507	GSM340686	Bladder cancer	Bladder cancer	Tumor	Tumor-Normal
BC_S33	GPL6102	GSE13507	GSM340687	Bladder cancer	Bladder cancer	Tumor	Tumor-Normal
BC_S33	GPL6102	GSE13507	GSM340688	Bladder cancer	Bladder cancer	Tumor	Tumor-Normal
BC_S33	GPL6102	GSE13507	GSM340689	Bladder cancer	Bladder cancer	Tumor	Tumor-Normal
BC_S33	GPL6102	GSE13507	GSM340690	Bladder cancer	Bladder cancer	Tumor	Tumor-Normal
BC_S33	GPL6102	GSE13507	GSM340691	Bladder cancer	Bladder cancer	Tumor	Tumor-Normal
BC_S33	GPL6102	GSE13507	GSM340692	Bladder cancer	Bladder cancer	Tumor	Tumor-Normal
BC_S33	GPL6102	GSE13507	GSM340693	Bladder cancer	Bladder cancer	Tumor	Tumor-Normal
BC_S33	GPL6102	GSE13507	GSM340694	Bladder cancer	Bladder cancer	Tumor	Tumor-Normal
BC_S33	GPL6102	GSE13507	GSM340695	Bladder cancer	Bladder cancer	Tumor	Tumor-Normal
BC_S33	GPL6102	GSE13507	GSM340696	Bladder cancer	Bladder cancer	Tumor	Tumor-Normal
BC_S33	GPL6102	GSE13507	GSM340697	Bladder cancer	Bladder cancer	Tumor	Tumor-Normal
BC_S33	GPL6102	GSE13507	GSM340698	Bladder cancer	Bladder cancer	Tumor	Tumor-Normal
BC_S33	GPL6102	GSE13507	GSM340699	Bladder cancer	Bladder cancer	Tumor	Tumor-Normal
BC_S33	GPL6102	GSE13507	GSM340700	Bladder cancer	Bladder cancer	Tumor	Tumor-Normal
BC_S33	GPL6102	GSE13507	GSM340701	Bladder cancer	Bladder cancer	Tumor	Tumor-Normal
BC_S33	GPL6102	GSE13507	GSM340702	Bladder cancer	Bladder cancer	Tumor	Tumor-Normal
BC_S33	GPL6102	GSE13507	GSM340703	Bladder cancer	Bladder cancer	Tumor	Tumor-Normal
BC_S33	GPL6102	GSE13507	GSM340704	Bladder cancer	Bladder cancer	Tumor	Tumor-Normal
BC_S33	GPL6102	GSE13507	GSM340705	Bladder cancer	Bladder cancer	Tumor	Tumor-Normal
BC_S33	GPL6102	GSE13507	GSM340706	Bladder cancer	Bladder cancer	Tumor	Tumor-Normal
BC_S33	GPL6102	GSE13507	GSM340707	Bladder cancer	Bladder cancer	Tumor	Tumor-Normal
BC_S33	GPL6102	GSE13507	GSM340708	Bladder cancer	Bladder cancer	Tumor	Tumor-Normal
BC_S33	GPL6102	GSE13507	GSM340709	Bladder cancer	Bladder cancer	Tumor	Tumor-Normal
BC_S33	GPL6102	GSE13507	GSM340710	Bladder cancer	Bladder cancer	Tumor	Tumor-Normal
BC_S33	GPL6102	GSE13507	GSM340711	Bladder cancer	Bladder cancer	Tumor	Tumor-Normal
BC_S33	GPL6102	GSE13507	GSM340712	Bladder cancer	Bladder cancer	Tumor	Tumor-Normal
BC_S33	GPL6102	GSE13507	GSM340713	Bladder cancer	Bladder cancer	Tumor	Tumor-Normal
BC_S33	GPL6102	GSE13507	GSM340714	Bladder cancer	Bladder cancer	Tumor	Tumor-Normal
BC_S33	GPL6102	GSE13507	GSM340715	Bladder cancer	Bladder cancer	Tumor	Tumor-Normal
BC_S33	GPL6102	GSE13507	GSM340716	Bladder cancer	Bladder cancer	Tumor	Tumor-Normal
BC_S33	GPL6102	GSE13507	GSM340717	Bladder cancer	Bladder cancer	Tumor	Tumor-Normal
BC_S33	GPL6102	GSE13507	GSM340718	Bladder cancer	Bladder cancer	Tumor	Tumor-Normal
BC_S33	GPL6102	GSE13507	GSM340719	Bladder cancer	Bladder cancer	Tumor	Tumor-Normal
BC_S33	GPL6102	GSE13507	GSM340720	Bladder cancer	Bladder cancer	Tumor	Tumor-Normal
BC_S33	GPL6102	GSE13507	GSM340721	Bladder cancer	Bladder cancer	Tumor	Tumor-Normal
BC_S33	GPL6102	GSE13507	GSM340722	Bladder cancer	Bladder cancer	Tumor	Tumor-Normal
BC_S33	GPL6102	GSE13507	GSM340723	Bladder cancer	Bladder cancer	Tumor	Tumor-Normal
BC_S33	GPL6102	GSE13507	GSM340724	Bladder cancer	Bladder cancer	Tumor	Tumor-Normal
BC_S33	GPL6102	GSE13507	GSM340725	Bladder cancer	Bladder cancer	Tumor	Tumor-Normal
BC_S33	GPL6102	GSE13507	GSM340726	Bladder cancer	Bladder cancer	Tumor	Tumor-Normal
BC_S33	GPL6102	GSE13507	GSM340727	Bladder cancer	Bladder cancer	Tumor	Tumor-Normal
BC_S33	GPL6102	GSE13507	GSM340728	Bladder cancer	Bladder cancer	Tumor	Tumor-Normal
BC_S33	GPL6102	GSE13507	GSM340729	Bladder cancer	Bladder cancer	Tumor	Tumor-Normal
BC_S33	GPL6102	GSE13507	GSM340730	Bladder cancer	Bladder cancer	Tumor	Tumor-Normal
BC_S33	GPL6102	GSE13507	GSM340731	Bladder cancer	Bladder cancer	Tumor	Tumor-Normal
BC_S33	GPL6102	GSE13507	GSM340732	Bladder cancer	Bladder cancer	Tumor	Tumor-Normal
BC_S33	GPL6102	GSE13507	GSM340733	Bladder cancer	Bladder cancer	Tumor	Tumor-Normal
BC_S33	GPL6102	GSE13507	GSM340734	Bladder cancer	Bladder cancer	Tumor	Tumor-Normal
BC_S33	GPL6102	GSE13507	GSM340735	Bladder cancer	Bladder cancer	Tumor	Tumor-Normal
BC_S33	GPL6102	GSE13507	GSM340736	Bladder cancer	Bladder cancer	Tumor	Tumor-Normal
BC_S33	GPL6102	GSE13507	GSM340737	Bladder cancer	Bladder cancer	Tumor	Tumor-Normal
BC_S33	GPL6102	GSE13507	GSM340738	Bladder cancer	Bladder cancer	Tumor	Tumor-Normal
BC_S33	GPL6102	GSE13507	GSM340739	Bladder cancer	Bladder cancer	Tumor	Tumor-Normal
BC_S33	GPL6102	GSE13507	GSM340740	Bladder cancer	Bladder cancer	Tumor	Tumor-Normal
BC_S33	GPL6102	GSE13507	GSM340741	Bladder cancer	Bladder cancer	Tumor	Tumor-Normal
BC_S33	GPL6102	GSE13507	GSM340742	Bladder cancer	Bladder cancer	Tumor	Tumor-Normal
BC_S33	GPL6102	GSE13507	GSM340743	Bladder cancer	Bladder cancer	Tumor	Tumor-Normal
BC_S33	GPL6102	GSE13507	GSM340744	Bladder cancer	Bladder cancer	Tumor	Tumor-Normal
BC_S33	GPL6102	GSE13507	GSM340745	Bladder cancer	Bladder cancer	Tumor	Tumor-Normal
BC_S33	GPL6102	GSE13507	GSM340746	Bladder cancer	Bladder cancer	Tumor	Tumor-Normal
BC_S33	GPL6102	GSE13507	GSM340747	Bladder cancer	Bladder cancer	Tumor	Tumor-Normal
BC_S33	GPL6102	GSE13507	GSM340748	Bladder cancer	Bladder cancer	Tumor	Tumor-Normal
BC_S33	GPL6102	GSE13507	GSM340749	Bladder cancer	Bladder cancer	Tumor	Tumor-Normal
BC_S33	GPL6102	GSE13507	GSM340750	Bladder cancer	Bladder cancer	Tumor	Tumor-Normal
BC_S33	GPL6102	GSE13507	GSM340751	Bladder cancer	Bladder cancer	Tumor	Tumor-Normal
BC_S33	GPL6102	GSE13507	GSM340752	Bladder cancer	Bladder cancer	Tumor	Tumor-Normal
BC_S33	GPL6102	GSE13507	GSM340753	Bladder cancer	Bladder cancer	Tumor	Tumor-Normal
BC_S33	GPL6102	GSE13507	GSM340754	Bladder cancer	Bladder cancer	Tumor	Tumor-Normal
BC_S33	GPL6102	GSE13507	GSM340755	Bladder cancer	Bladder cancer	Tumor	Tumor-Normal
BC_S33	GPL6102	GSE13507	GSM340756	Bladder cancer	Bladder cancer	Tumor	Tumor-Normal
BC_S33	GPL6102	GSE13507	GSM340757	Bladder cancer	Bladder cancer	Tumor	Tumor-Normal
BC_S33	GPL6102	GSE13507	GSM340758	Bladder cancer	Bladder cancer	Tumor	Tumor-Normal
BC_S33	GPL6102	GSE13507	GSM340759	Bladder cancer	Bladder cancer	Tumor	Tumor-Normal
BC_S33	GPL6102	GSE13507	GSM340760	Bladder cancer	Bladder cancer	Tumor	Tumor-Normal
BC_S33	GPL6102	GSE13507	GSM340761	Bladder cancer	Bladder cancer	Tumor	Tumor-Normal
BC_S33	GPL6102	GSE13507	GSM340762	Bladder cancer	Bladder cancer	Tumor	Tumor-Normal
BC_S33	GPL6102	GSE13507	GSM340763	Bladder cancer	Bladder cancer	Tumor	Tumor-Normal
BC_S33	GPL6102	GSE13507	GSM340764	Bladder cancer	Bladder cancer	Tumor	Tumor-Normal
BC_S33	GPL6102	GSE13507	GSM340765	Bladder cancer	Bladder cancer	Tumor	Tumor-Normal
BC_S33	GPL6102	GSE13507	GSM340766	Bladder cancer	Bladder cancer	Tumor	Tumor-Normal
BC_S33	GPL6102	GSE13507	GSM340767	Bladder cancer	Bladder cancer	Tumor	Tumor-Normal
BC_S33	GPL6102	GSE13507	GSM340768	Bladder cancer	Bladder cancer	Tumor	Tumor-Normal
BC_S33	GPL6102	GSE13507	GSM340769	Bladder cancer	Bladder cancer	Tumor	Tumor-Normal
BC_S33	GPL6102	GSE13507	GSM340770	Bladder cancer	Bladder cancer	Tumor	Tumor-Normal
BC_S33	GPL6102	GSE13507	GSM340771	Bladder cancer	Bladder cancer	Tumor	Tumor-Normal
BC_S33	GPL6102	GSE13507	GSM340772	Bladder cancer	Bladder cancer	Tumor	Tumor-Normal
BC_S33	GPL6102	GSE13507	GSM340773	Bladder cancer	Bladder cancer	Tumor	Tumor-Normal
BC_S33	GPL6102	GSE13507	GSM340774	Bladder cancer	Bladder cancer	Tumor	Tumor-Normal
BC_S33	GPL6102	GSE13507	GSM340775	Bladder cancer	Bladder cancer	Tumor	Tumor-Normal
BC_S33	GPL6102	GSE13507	GSM340776	Bladder cancer	Bladder cancer	Tumor	Tumor-Normal
BC_S33	GPL6102	GSE13507	GSM340777	Bladder cancer	Bladder cancer	Tumor	Tumor-Normal
BC_S33	GPL6102	GSE13507	GSM340778	Bladder cancer	Bladder cancer	Tumor	Tumor-Normal
BC_S33	GPL6102	GSE13507	GSM340779	Bladder cancer	Bladder cancer	Tumor	Tumor-Normal
BC_S33	GPL6102	GSE13507	GSM340780	Bladder cancer	Bladder cancer	Tumor	Tumor-Normal
BC_S33	GPL6102	GSE13507	GSM340781	Bladder cancer	Bladder cancer	Tumor	Tumor-Normal
BC_S33	GPL6102	GSE13507	GSM340782	Bladder cancer	Bladder cancer	Tumor	Tumor-Normal
BC_S33	GPL6102	GSE13507	GSM340783	Bladder cancer	Bladder cancer	Tumor	Tumor-Normal
BC_S33	GPL6102	GSE13507	GSM340784	Bladder cancer	Bladder cancer	Tumor	Tumor-Normal
BC_S33	GPL6102	GSE13507	GSM340785	Bladder cancer	Bladder cancer	Tumor	Tumor-Normal
BC_S33	GPL6102	GSE13507	GSM340786	Bladder cancer	Bladder cancer	Tumor	Tumor-Normal
BC_S33	GPL6102	GSE13507	GSM340787	Bladder cancer	Bladder cancer	Tumor	Tumor-Normal
BC_S33	GPL6102	GSE13507	GSM340788	Bladder cancer	Bladder cancer	Tumor	Tumor-Normal
BC_S33	GPL6102	GSE13507	GSM340789	Bladder cancer	Bladder cancer	Tumor	Tumor-Normal
BC_S33	GPL6102	GSE13507	GSM340790	Bladder cancer	Bladder cancer	Tumor	Tumor-Normal
BC_S33	GPL6102	GSE13507	GSM340791	Bladder cancer	Bladder cancer	Tumor	Tumor-Normal
BC_S33	GPL6102	GSE13507	GSM340792	Bladder cancer	Bladder cancer	Tumor	Tumor-Normal
BC_S35	GPL6102	GSE13507	GSM340605	Bladder cancer	Bladder cancer	Low grade	High grade-Low grade
BC_S35	GPL6102	GSE13507	GSM340606	Bladder cancer	Bladder cancer	Low grade	High grade-Low grade
BC_S35	GPL6102	GSE13507	GSM340607	Bladder cancer	Bladder cancer	Low grade	High grade-Low grade
BC_S35	GPL6102	GSE13507	GSM340608	Bladder cancer	Bladder cancer	Low grade	High grade-Low grade
BC_S35	GPL6102	GSE13507	GSM340609	Bladder cancer	Bladder cancer	Low grade	High grade-Low grade
BC_S35	GPL6102	GSE13507	GSM340610	Bladder cancer	Bladder cancer	Low grade	High grade-Low grade
BC_S35	GPL6102	GSE13507	GSM340611	Bladder cancer	Bladder cancer	Low grade	High grade-Low grade
BC_S35	GPL6102	GSE13507	GSM340612	Bladder cancer	Bladder cancer	Low grade	High grade-Low grade
BC_S35	GPL6102	GSE13507	GSM340613	Bladder cancer	Bladder cancer	High grade	High grade-Low grade
BC_S35	GPL6102	GSE13507	GSM340614	Bladder cancer	Bladder cancer	Low grade	High grade-Low grade
BC_S35	GPL6102	GSE13507	GSM340615	Bladder cancer	Bladder cancer	Low grade	High grade-Low grade
BC_S35	GPL6102	GSE13507	GSM340616	Bladder cancer	Bladder cancer	Low grade	High grade-Low grade
BC_S35	GPL6102	GSE13507	GSM340617	Bladder cancer	Bladder cancer	Low grade	High grade-Low grade
BC_S35	GPL6102	GSE13507	GSM340618	Bladder cancer	Bladder cancer	Low grade	High grade-Low grade
BC_S35	GPL6102	GSE13507	GSM340619	Bladder cancer	Bladder cancer	Low grade	High grade-Low grade
BC_S35	GPL6102	GSE13507	GSM340620	Bladder cancer	Bladder cancer	Low grade	High grade-Low grade
BC_S35	GPL6102	GSE13507	GSM340621	Bladder cancer	Bladder cancer	Low grade	High grade-Low grade
BC_S35	GPL6102	GSE13507	GSM340622	Bladder cancer	Bladder cancer	Low grade	High grade-Low grade
BC_S35	GPL6102	GSE13507	GSM340623	Bladder cancer	Bladder cancer	High grade	High grade-Low grade
BC_S35	GPL6102	GSE13507	GSM340624	Bladder cancer	Bladder cancer	Low grade	High grade-Low grade
BC_S35	GPL6102	GSE13507	GSM340625	Bladder cancer	Bladder cancer	Low grade	High grade-Low grade
BC_S35	GPL6102	GSE13507	GSM340626	Bladder cancer	Bladder cancer	Low grade	High grade-Low grade
BC_S35	GPL6102	GSE13507	GSM340627	Bladder cancer	Bladder cancer	Low grade	High grade-Low grade
BC_S35	GPL6102	GSE13507	GSM340628	Bladder cancer	Bladder cancer	High grade	High grade-Low grade
BC_S35	GPL6102	GSE13507	GSM340629	Bladder cancer	Bladder cancer	Low grade	High grade-Low grade
BC_S35	GPL6102	GSE13507	GSM340630	Bladder cancer	Bladder cancer	Low grade	High grade-Low grade
BC_S35	GPL6102	GSE13507	GSM340631	Bladder cancer	Bladder cancer	Low grade	High grade-Low grade
BC_S35	GPL6102	GSE13507	GSM340632	Bladder cancer	Bladder cancer	Low grade	High grade-Low grade
BC_S35	GPL6102	GSE13507	GSM340633	Bladder cancer	Bladder cancer	High grade	High grade-Low grade
BC_S35	GPL6102	GSE13507	GSM340634	Bladder cancer	Bladder cancer	High grade	High grade-Low grade
BC_S35	GPL6102	GSE13507	GSM340635	Bladder cancer	Bladder cancer	Low grade	High grade-Low grade
BC_S35	GPL6102	GSE13507	GSM340636	Bladder cancer	Bladder cancer	High grade	High grade-Low grade
BC_S35	GPL6102	GSE13507	GSM340637	Bladder cancer	Bladder cancer	Low grade	High grade-Low grade
BC_S35	GPL6102	GSE13507	GSM340638	Bladder cancer	Bladder cancer	Low grade	High grade-Low grade
BC_S35	GPL6102	GSE13507	GSM340639	Bladder cancer	Bladder cancer	Low grade	High grade-Low grade
BC_S35	GPL6102	GSE13507	GSM340640	Bladder cancer	Bladder cancer	Low grade	High grade-Low grade
BC_S35	GPL6102	GSE13507	GSM340641	Bladder cancer	Bladder cancer	High grade	High grade-Low grade
BC_S35	GPL6102	GSE13507	GSM340642	Bladder cancer	Bladder cancer	Low grade	High grade-Low grade
BC_S35	GPL6102	GSE13507	GSM340643	Bladder cancer	Bladder cancer	Low grade	High grade-Low grade
BC_S35	GPL6102	GSE13507	GSM340644	Bladder cancer	Bladder cancer	Low grade	High grade-Low grade
BC_S35	GPL6102	GSE13507	GSM340645	Bladder cancer	Bladder cancer	High grade	High grade-Low grade
BC_S35	GPL6102	GSE13507	GSM340646	Bladder cancer	Bladder cancer	High grade	High grade-Low grade
BC_S35	GPL6102	GSE13507	GSM340647	Bladder cancer	Bladder cancer	Low grade	High grade-Low grade
BC_S35	GPL6102	GSE13507	GSM340648	Bladder cancer	Bladder cancer	Low grade	High grade-Low grade
BC_S35	GPL6102	GSE13507	GSM340649	Bladder cancer	Bladder cancer	Low grade	High grade-Low grade
BC_S35	GPL6102	GSE13507	GSM340650	Bladder cancer	Bladder cancer	Low grade	High grade-Low grade
BC_S35	GPL6102	GSE13507	GSM340651	Bladder cancer	Bladder cancer	Low grade	High grade-Low grade
BC_S35	GPL6102	GSE13507	GSM340652	Bladder cancer	Bladder cancer	Low grade	High grade-Low grade
BC_S35	GPL6102	GSE13507	GSM340653	Bladder cancer	Bladder cancer	High grade	High grade-Low grade
BC_S35	GPL6102	GSE13507	GSM340654	Bladder cancer	Bladder cancer	High grade	High grade-Low grade
BC_S35	GPL6102	GSE13507	GSM340655	Bladder cancer	Bladder cancer	High grade	High grade-Low grade
BC_S35	GPL6102	GSE13507	GSM340656	Bladder cancer	Bladder cancer	High grade	High grade-Low grade
BC_S35	GPL6102	GSE13507	GSM340657	Bladder cancer	Bladder cancer	Low grade	High grade-Low grade
BC_S35	GPL6102	GSE13507	GSM340658	Bladder cancer	Bladder cancer	Low grade	High grade-Low grade
BC_S35	GPL6102	GSE13507	GSM340659	Bladder cancer	Bladder cancer	Low grade	High grade-Low grade
BC_S35	GPL6102	GSE13507	GSM340660	Bladder cancer	Bladder cancer	Low grade	High grade-Low grade
BC_S35	GPL6102	GSE13507	GSM340661	Bladder cancer	Bladder cancer	Low grade	High grade-Low grade
BC_S35	GPL6102	GSE13507	GSM340662	Bladder cancer	Bladder cancer	High grade	High grade-Low grade
BC_S35	GPL6102	GSE13507	GSM340663	Bladder cancer	Bladder cancer	High grade	High grade-Low grade
BC_S35	GPL6102	GSE13507	GSM340664	Bladder cancer	Bladder cancer	Low grade	High grade-Low grade
BC_S35	GPL6102	GSE13507	GSM340665	Bladder cancer	Bladder cancer	High grade	High grade-Low grade
BC_S35	GPL6102	GSE13507	GSM340666	Bladder cancer	Bladder cancer	Low grade	High grade-Low grade
BC_S35	GPL6102	GSE13507	GSM340667	Bladder cancer	Bladder cancer	Low grade	High grade-Low grade
BC_S35	GPL6102	GSE13507	GSM340668	Bladder cancer	Bladder cancer	Low grade	High grade-Low grade
BC_S35	GPL6102	GSE13507	GSM340669	Bladder cancer	Bladder cancer	Low grade	High grade-Low grade
BC_S35	GPL6102	GSE13507	GSM340670	Bladder cancer	Bladder cancer	Low grade	High grade-Low grade
BC_S35	GPL6102	GSE13507	GSM340671	Bladder cancer	Bladder cancer	High grade	High grade-Low grade
BC_S35	GPL6102	GSE13507	GSM340672	Bladder cancer	Bladder cancer	High grade	High grade-Low grade
BC_S35	GPL6102	GSE13507	GSM340673	Bladder cancer	Bladder cancer	Low grade	High grade-Low grade
BC_S35	GPL6102	GSE13507	GSM340674	Bladder cancer	Bladder cancer	High grade	High grade-Low grade
BC_S35	GPL6102	GSE13507	GSM340675	Bladder cancer	Bladder cancer	High grade	High grade-Low grade
BC_S35	GPL6102	GSE13507	GSM340676	Bladder cancer	Bladder cancer	Low grade	High grade-Low grade
BC_S35	GPL6102	GSE13507	GSM340677	Bladder cancer	Bladder cancer	High grade	High grade-Low grade
BC_S35	GPL6102	GSE13507	GSM340678	Bladder cancer	Bladder cancer	High grade	High grade-Low grade
BC_S35	GPL6102	GSE13507	GSM340679	Bladder cancer	Bladder cancer	Low grade	High grade-Low grade
BC_S35	GPL6102	GSE13507	GSM340680	Bladder cancer	Bladder cancer	Low grade	High grade-Low grade
BC_S35	GPL6102	GSE13507	GSM340681	Bladder cancer	Bladder cancer	High grade	High grade-Low grade
BC_S35	GPL6102	GSE13507	GSM340682	Bladder cancer	Bladder cancer	Low grade	High grade-Low grade
BC_S35	GPL6102	GSE13507	GSM340683	Bladder cancer	Bladder cancer	Low grade	High grade-Low grade
BC_S35	GPL6102	GSE13507	GSM340684	Bladder cancer	Bladder cancer	High grade	High grade-Low grade
BC_S35	GPL6102	GSE13507	GSM340685	Bladder cancer	Bladder cancer	Low grade	High grade-Low grade
BC_S35	GPL6102	GSE13507	GSM340686	Bladder cancer	Bladder cancer	Low grade	High grade-Low grade
BC_S35	GPL6102	GSE13507	GSM340687	Bladder cancer	Bladder cancer	Low grade	High grade-Low grade
BC_S35	GPL6102	GSE13507	GSM340688	Bladder cancer	Bladder cancer	Low grade	High grade-Low grade
BC_S35	GPL6102	GSE13507	GSM340689	Bladder cancer	Bladder cancer	Low grade	High grade-Low grade
BC_S35	GPL6102	GSE13507	GSM340690	Bladder cancer	Bladder cancer	Low grade	High grade-Low grade
BC_S35	GPL6102	GSE13507	GSM340691	Bladder cancer	Bladder cancer	Low grade	High grade-Low grade
BC_S35	GPL6102	GSE13507	GSM340692	Bladder cancer	Bladder cancer	Low grade	High grade-Low grade
BC_S35	GPL6102	GSE13507	GSM340693	Bladder cancer	Bladder cancer	High grade	High grade-Low grade
BC_S35	GPL6102	GSE13507	GSM340694	Bladder cancer	Bladder cancer	High grade	High grade-Low grade
BC_S35	GPL6102	GSE13507	GSM340695	Bladder cancer	Bladder cancer	Low grade	High grade-Low grade
BC_S35	GPL6102	GSE13507	GSM340696	Bladder cancer	Bladder cancer	High grade	High grade-Low grade
BC_S35	GPL6102	GSE13507	GSM340697	Bladder cancer	Bladder cancer	High grade	High grade-Low grade
BC_S35	GPL6102	GSE13507	GSM340698	Bladder cancer	Bladder cancer	High grade	High grade-Low grade
BC_S35	GPL6102	GSE13507	GSM340699	Bladder cancer	Bladder cancer	Low grade	High grade-Low grade
BC_S35	GPL6102	GSE13507	GSM340700	Bladder cancer	Bladder cancer	High grade	High grade-Low grade
BC_S35	GPL6102	GSE13507	GSM340701	Bladder cancer	Bladder cancer	High grade	High grade-Low grade
BC_S35	GPL6102	GSE13507	GSM340702	Bladder cancer	Bladder cancer	Low grade	High grade-Low grade
BC_S35	GPL6102	GSE13507	GSM340703	Bladder cancer	Bladder cancer	Low grade	High grade-Low grade
BC_S35	GPL6102	GSE13507	GSM340704	Bladder cancer	Bladder cancer	High grade	High grade-Low grade
BC_S35	GPL6102	GSE13507	GSM340705	Bladder cancer	Bladder cancer	High grade	High grade-Low grade
BC_S35	GPL6102	GSE13507	GSM340706	Bladder cancer	Bladder cancer	High grade	High grade-Low grade
BC_S35	GPL6102	GSE13507	GSM340707	Bladder cancer	Bladder cancer	Low grade	High grade-Low grade
BC_S35	GPL6102	GSE13507	GSM340708	Bladder cancer	Bladder cancer	High grade	High grade-Low grade
BC_S35	GPL6102	GSE13507	GSM340709	Bladder cancer	Bladder cancer	Low grade	High grade-Low grade
BC_S35	GPL6102	GSE13507	GSM340710	Bladder cancer	Bladder cancer	High grade	High grade-Low grade
BC_S35	GPL6102	GSE13507	GSM340711	Bladder cancer	Bladder cancer	Low grade	High grade-Low grade
BC_S35	GPL6102	GSE13507	GSM340712	Bladder cancer	Bladder cancer	High grade	High grade-Low grade
BC_S35	GPL6102	GSE13507	GSM340713	Bladder cancer	Bladder cancer	Low grade	High grade-Low grade
BC_S35	GPL6102	GSE13507	GSM340714	Bladder cancer	Bladder cancer	High grade	High grade-Low grade
BC_S35	GPL6102	GSE13507	GSM340715	Bladder cancer	Bladder cancer	Low grade	High grade-Low grade
BC_S35	GPL6102	GSE13507	GSM340716	Bladder cancer	Bladder cancer	Low grade	High grade-Low grade
BC_S35	GPL6102	GSE13507	GSM340717	Bladder cancer	Bladder cancer	Low grade	High grade-Low grade
BC_S35	GPL6102	GSE13507	GSM340718	Bladder cancer	Bladder cancer	Low grade	High grade-Low grade
BC_S35	GPL6102	GSE13507	GSM340719	Bladder cancer	Bladder cancer	Low grade	High grade-Low grade
BC_S35	GPL6102	GSE13507	GSM340720	Bladder cancer	Bladder cancer	High grade	High grade-Low grade
BC_S35	GPL6102	GSE13507	GSM340721	Bladder cancer	Bladder cancer	High grade	High grade-Low grade
BC_S35	GPL6102	GSE13507	GSM340722	Bladder cancer	Bladder cancer	Low grade	High grade-Low grade
BC_S35	GPL6102	GSE13507	GSM340723	Bladder cancer	Bladder cancer	High grade	High grade-Low grade
BC_S35	GPL6102	GSE13507	GSM340724	Bladder cancer	Bladder cancer	Low grade	High grade-Low grade
BC_S35	GPL6102	GSE13507	GSM340725	Bladder cancer	Bladder cancer	High grade	High grade-Low grade
BC_S35	GPL6102	GSE13507	GSM340726	Bladder cancer	Bladder cancer	Low grade	High grade-Low grade
BC_S35	GPL6102	GSE13507	GSM340727	Bladder cancer	Bladder cancer	Low grade	High grade-Low grade
BC_S35	GPL6102	GSE13507	GSM340728	Bladder cancer	Bladder cancer	High grade	High grade-Low grade
BC_S35	GPL6102	GSE13507	GSM340729	Bladder cancer	Bladder cancer	Low grade	High grade-Low grade
BC_S35	GPL6102	GSE13507	GSM340730	Bladder cancer	Bladder cancer	Low grade	High grade-Low grade
BC_S35	GPL6102	GSE13507	GSM340731	Bladder cancer	Bladder cancer	High grade	High grade-Low grade
BC_S35	GPL6102	GSE13507	GSM340732	Bladder cancer	Bladder cancer	High grade	High grade-Low grade
BC_S35	GPL6102	GSE13507	GSM340733	Bladder cancer	Bladder cancer	Low grade	High grade-Low grade
BC_S35	GPL6102	GSE13507	GSM340734	Bladder cancer	Bladder cancer	Low grade	High grade-Low grade
BC_S35	GPL6102	GSE13507	GSM340735	Bladder cancer	Bladder cancer	Low grade	High grade-Low grade
BC_S35	GPL6102	GSE13507	GSM340736	Bladder cancer	Bladder cancer	High grade	High grade-Low grade
BC_S35	GPL6102	GSE13507	GSM340737	Bladder cancer	Bladder cancer	Low grade	High grade-Low grade
BC_S35	GPL6102	GSE13507	GSM340738	Bladder cancer	Bladder cancer	Low grade	High grade-Low grade
BC_S35	GPL6102	GSE13507	GSM340739	Bladder cancer	Bladder cancer	Low grade	High grade-Low grade
BC_S35	GPL6102	GSE13507	GSM340740	Bladder cancer	Bladder cancer	Low grade	High grade-Low grade
BC_S35	GPL6102	GSE13507	GSM340741	Bladder cancer	Bladder cancer	Low grade	High grade-Low grade
BC_S35	GPL6102	GSE13507	GSM340742	Bladder cancer	Bladder cancer	Low grade	High grade-Low grade
BC_S35	GPL6102	GSE13507	GSM340743	Bladder cancer	Bladder cancer	Low grade	High grade-Low grade
BC_S35	GPL6102	GSE13507	GSM340744	Bladder cancer	Bladder cancer	High grade	High grade-Low grade
BC_S35	GPL6102	GSE13507	GSM340745	Bladder cancer	Bladder cancer	High grade	High grade-Low grade
BC_S35	GPL6102	GSE13507	GSM340746	Bladder cancer	Bladder cancer	High grade	High grade-Low grade
BC_S35	GPL6102	GSE13507	GSM340747	Bladder cancer	Bladder cancer	Low grade	High grade-Low grade
BC_S35	GPL6102	GSE13507	GSM340748	Bladder cancer	Bladder cancer	Low grade	High grade-Low grade
BC_S35	GPL6102	GSE13507	GSM340749	Bladder cancer	Bladder cancer	Low grade	High grade-Low grade
BC_S35	GPL6102	GSE13507	GSM340750	Bladder cancer	Bladder cancer	Low grade	High grade-Low grade
BC_S35	GPL6102	GSE13507	GSM340751	Bladder cancer	Bladder cancer	Low grade	High grade-Low grade
BC_S35	GPL6102	GSE13507	GSM340752	Bladder cancer	Bladder cancer	High grade	High grade-Low grade
BC_S35	GPL6102	GSE13507	GSM340753	Bladder cancer	Bladder cancer	Low grade	High grade-Low grade
BC_S35	GPL6102	GSE13507	GSM340754	Bladder cancer	Bladder cancer	Low grade	High grade-Low grade
BC_S35	GPL6102	GSE13507	GSM340755	Bladder cancer	Bladder cancer	High grade	High grade-Low grade
BC_S35	GPL6102	GSE13507	GSM340756	Bladder cancer	Bladder cancer	Low grade	High grade-Low grade
BC_S35	GPL6102	GSE13507	GSM340757	Bladder cancer	Bladder cancer	High grade	High grade-Low grade
BC_S35	GPL6102	GSE13507	GSM340758	Bladder cancer	Bladder cancer	High grade	High grade-Low grade
BC_S35	GPL6102	GSE13507	GSM340759	Bladder cancer	Bladder cancer	High grade	High grade-Low grade
BC_S35	GPL6102	GSE13507	GSM340760	Bladder cancer	Bladder cancer	High grade	High grade-Low grade
BC_S35	GPL6102	GSE13507	GSM340761	Bladder cancer	Bladder cancer	High grade	High grade-Low grade
BC_S35	GPL6102	GSE13507	GSM340762	Bladder cancer	Bladder cancer	High grade	High grade-Low grade
BC_S35	GPL6102	GSE13507	GSM340763	Bladder cancer	Bladder cancer	Low grade	High grade-Low grade
BC_S35	GPL6102	GSE13507	GSM340764	Bladder cancer	Bladder cancer	Low grade	High grade-Low grade
BC_S35	GPL6102	GSE13507	GSM340765	Bladder cancer	Bladder cancer	High grade	High grade-Low grade
BC_S35	GPL6102	GSE13507	GSM340766	Bladder cancer	Bladder cancer	High grade	High grade-Low grade
BC_S35	GPL6102	GSE13507	GSM340767	Bladder cancer	Bladder cancer	Low grade	High grade-Low grade
BC_S35	GPL6102	GSE13507	GSM340768	Bladder cancer	Bladder cancer	Low grade	High grade-Low grade
BC_S35	GPL6102	GSE13507	GSM340769	Bladder cancer	Bladder cancer	High grade	High grade-Low grade
BC_S36	GPL570	GSE7476	GSM180991	Bladder cancer	Bladder cancer	Normal	Tumor-Normal
BC_S36	GPL570	GSE7476	GSM180992	Bladder cancer	Bladder cancer	Normal	Tumor-Normal
BC_S36	GPL570	GSE7476	GSM180993	Bladder cancer	Bladder cancer	Normal	Tumor-Normal
BC_S36	GPL570	GSE7476	GSM180994	Bladder cancer	Bladder cancer	Tumor	Tumor-Normal
BC_S36	GPL570	GSE7476	GSM180995	Bladder cancer	Bladder cancer	Tumor	Tumor-Normal
BC_S36	GPL570	GSE7476	GSM180996	Bladder cancer	Bladder cancer	Tumor	Tumor-Normal
BC_S36	GPL570	GSE7476	GSM180997	Bladder cancer	Bladder cancer	Tumor	Tumor-Normal
BC_S36	GPL570	GSE7476	GSM180998	Bladder cancer	Bladder cancer	Tumor	Tumor-Normal
BC_S36	GPL570	GSE7476	GSM180999	Bladder cancer	Bladder cancer	Tumor	Tumor-Normal
BC_S36	GPL570	GSE7476	GSM181000	Bladder cancer	Bladder cancer	Tumor	Tumor-Normal
BC_S36	GPL570	GSE7476	GSM181001	Bladder cancer	Bladder cancer	Tumor	Tumor-Normal
BC_S36	GPL570	GSE7476	GSM181002	Bladder cancer	Bladder cancer	Tumor	Tumor-Normal
BC_S37	GPL96	GSE3167	GSM71019	Bladder cancer	Bladder cancer	Normal	Tumor-Normal
BC_S37	GPL96	GSE3167	GSM71020	Bladder cancer	Bladder cancer	Normal	Tumor-Normal
BC_S37	GPL96	GSE3167	GSM71021	Bladder cancer	Bladder cancer	Normal	Tumor-Normal
BC_S37	GPL96	GSE3167	GSM71022	Bladder cancer	Bladder cancer	Normal	Tumor-Normal
BC_S37	GPL96	GSE3167	GSM71023	Bladder cancer	Bladder cancer	Normal	Tumor-Normal
BC_S37	GPL96	GSE3167	GSM71024	Bladder cancer	Bladder cancer	Normal	Tumor-Normal
BC_S37	GPL96	GSE3167	GSM71025	Bladder cancer	Bladder cancer	Normal	Tumor-Normal
BC_S37	GPL96	GSE3167	GSM71026	Bladder cancer	Bladder cancer	Normal	Tumor-Normal
BC_S37	GPL96	GSE3167	GSM71027	Bladder cancer	Bladder cancer	Normal	Tumor-Normal
BC_S37	GPL96	GSE3167	GSM71028	Bladder cancer	Bladder cancer	Tumor	Tumor-Normal
BC_S37	GPL96	GSE3167	GSM71029	Bladder cancer	Bladder cancer	Tumor	Tumor-Normal
BC_S37	GPL96	GSE3167	GSM71030	Bladder cancer	Bladder cancer	Tumor	Tumor-Normal
BC_S37	GPL96	GSE3167	GSM71031	Bladder cancer	Bladder cancer	Tumor	Tumor-Normal
BC_S37	GPL96	GSE3167	GSM71032	Bladder cancer	Bladder cancer	Tumor	Tumor-Normal
BC_S37	GPL96	GSE3167	GSM71033	Bladder cancer	Bladder cancer	Tumor	Tumor-Normal
BC_S37	GPL96	GSE3167	GSM71034	Bladder cancer	Bladder cancer	Tumor	Tumor-Normal
BC_S37	GPL96	GSE3167	GSM71035	Bladder cancer	Bladder cancer	Tumor	Tumor-Normal
BC_S37	GPL96	GSE3167	GSM71036	Bladder cancer	Bladder cancer	Tumor	Tumor-Normal
BC_S37	GPL96	GSE3167	GSM71037	Bladder cancer	Bladder cancer	Tumor	Tumor-Normal
BC_S37	GPL96	GSE3167	GSM71038	Bladder cancer	Bladder cancer	Tumor	Tumor-Normal
BC_S37	GPL96	GSE3167	GSM71039	Bladder cancer	Bladder cancer	Tumor	Tumor-Normal
BC_S37	GPL96	GSE3167	GSM71040	Bladder cancer	Bladder cancer	Tumor	Tumor-Normal
BC_S37	GPL96	GSE3167	GSM71041	Bladder cancer	Bladder cancer	Tumor	Tumor-Normal
BC_S37	GPL96	GSE3167	GSM71042	Bladder cancer	Bladder cancer	Tumor	Tumor-Normal
BC_S37	GPL96	GSE3167	GSM71043	Bladder cancer	Bladder cancer	Tumor	Tumor-Normal
BC_S37	GPL96	GSE3167	GSM71044	Bladder cancer	Bladder cancer	Tumor	Tumor-Normal
BC_S37	GPL96	GSE3167	GSM71045	Bladder cancer	Bladder cancer	Tumor	Tumor-Normal
BC_S37	GPL96	GSE3167	GSM71046	Bladder cancer	Bladder cancer	Tumor	Tumor-Normal
BC_S37	GPL96	GSE3167	GSM71047	Bladder cancer	Bladder cancer	Tumor	Tumor-Normal
BC_S37	GPL96	GSE3167	GSM71048	Bladder cancer	Bladder cancer	Tumor	Tumor-Normal
BC_S37	GPL96	GSE3167	GSM71049	Bladder cancer	Bladder cancer	Tumor	Tumor-Normal
BC_S37	GPL96	GSE3167	GSM71050	Bladder cancer	Bladder cancer	Tumor	Tumor-Normal
BC_S37	GPL96	GSE3167	GSM71051	Bladder cancer	Bladder cancer	Tumor	Tumor-Normal
BC_S37	GPL96	GSE3167	GSM71052	Bladder cancer	Bladder cancer	Tumor	Tumor-Normal
BC_S37	GPL96	GSE3167	GSM71053	Bladder cancer	Bladder cancer	Tumor	Tumor-Normal
BC_S37	GPL96	GSE3167	GSM71054	Bladder cancer	Bladder cancer	Tumor	Tumor-Normal
BC_S37	GPL96	GSE3167	GSM71055	Bladder cancer	Bladder cancer	Tumor	Tumor-Normal
BC_S37	GPL96	GSE3167	GSM71056	Bladder cancer	Bladder cancer	Tumor	Tumor-Normal
BC_S37	GPL96	GSE3167	GSM71057	Bladder cancer	Bladder cancer	Tumor	Tumor-Normal
BC_S37	GPL96	GSE3167	GSM71058	Bladder cancer	Bladder cancer	Tumor	Tumor-Normal
BC_S37	GPL96	GSE3167	GSM71059	Bladder cancer	Bladder cancer	Tumor	Tumor-Normal
BC_S37	GPL96	GSE3167	GSM71060	Bladder cancer	Bladder cancer	Tumor	Tumor-Normal
BC_S37	GPL96	GSE3167	GSM71061	Bladder cancer	Bladder cancer	Tumor	Tumor-Normal
BC_S37	GPL96	GSE3167	GSM71062	Bladder cancer	Bladder cancer	Tumor	Tumor-Normal
BC_S37	GPL96	GSE3167	GSM71063	Bladder cancer	Bladder cancer	Tumor	Tumor-Normal
BC_S37	GPL96	GSE3167	GSM71064	Bladder cancer	Bladder cancer	Tumor	Tumor-Normal
BC_S37	GPL96	GSE3167	GSM71065	Bladder cancer	Bladder cancer	Tumor	Tumor-Normal
BC_S37	GPL96	GSE3167	GSM71066	Bladder cancer	Bladder cancer	Tumor	Tumor-Normal
BC_S37	GPL96	GSE3167	GSM71067	Bladder cancer	Bladder cancer	Tumor	Tumor-Normal
BC_S37	GPL96	GSE3167	GSM71068	Bladder cancer	Bladder cancer	Tumor	Tumor-Normal
BC_S42	GPL14951	GSE52329	GSM1263201	Bladder cancer	Bladder cancer	High stage(Stage III/IV)	High stage-Low stage
BC_S42	GPL14951	GSE52329	GSM1263202	Bladder cancer	Bladder cancer	High stage(Stage III/IV)	High stage-Low stage
BC_S42	GPL14951	GSE52329	GSM1263203	Bladder cancer	Bladder cancer	High stage(Stage III/IV)	High stage-Low stage
BC_S42	GPL14951	GSE52329	GSM1263204	Bladder cancer	Bladder cancer	Low stage(Stage I/II)	High stage-Low stage
BC_S42	GPL14951	GSE52329	GSM1263205	Bladder cancer	Bladder cancer	High stage(Stage III/IV)	High stage-Low stage
BC_S42	GPL14951	GSE52329	GSM1263206	Bladder cancer	Bladder cancer	Low stage(Stage I/II)	High stage-Low stage
BC_S42	GPL14951	GSE52329	GSM1263207	Bladder cancer	Bladder cancer	High stage(Stage III/IV)	High stage-Low stage
BC_S42	GPL14951	GSE52329	GSM1263208	Bladder cancer	Bladder cancer	High stage(Stage III/IV)	High stage-Low stage
BC_S42	GPL14951	GSE52329	GSM1263209	Bladder cancer	Bladder cancer	Low stage(Stage I/II)	High stage-Low stage
BC_S42	GPL14951	GSE52329	GSM1263210	Bladder cancer	Bladder cancer	High stage(Stage III/IV)	High stage-Low stage
BC_S42	GPL14951	GSE52329	GSM1263211	Bladder cancer	Bladder cancer	Low stage(Stage I/II)	High stage-Low stage
BC_S42	GPL14951	GSE52329	GSM1263212	Bladder cancer	Bladder cancer	High stage(Stage III/IV)	High stage-Low stage
BC_S42	GPL14951	GSE52329	GSM1263213	Bladder cancer	Bladder cancer	High stage(Stage III/IV)	High stage-Low stage
BC_S42	GPL14951	GSE52329	GSM1263214	Bladder cancer	Bladder cancer	High stage(Stage III/IV)	High stage-Low stage
BC_S42	GPL14951	GSE52329	GSM1263215	Bladder cancer	Bladder cancer	High stage(Stage III/IV)	High stage-Low stage
BC_S42	GPL14951	GSE52329	GSM1263216	Bladder cancer	Bladder cancer	High stage(Stage III/IV)	High stage-Low stage
BC_S42	GPL14951	GSE52329	GSM1263217	Bladder cancer	Bladder cancer	High stage(Stage III/IV)	High stage-Low stage
BC_S42	GPL14951	GSE52329	GSM1263218	Bladder cancer	Bladder cancer	Low stage(Stage I/II)	High stage-Low stage
BC_S42	GPL14951	GSE52329	GSM1263219	Bladder cancer	Bladder cancer	Low stage(Stage I/II)	High stage-Low stage
BC_S42	GPL14951	GSE52329	GSM1263220	Bladder cancer	Bladder cancer	High stage(Stage III/IV)	High stage-Low stage
BC_S43	GPL14951	GSE48276	GSM1173901	Bladder cancer	Bladder cancer	High stage(Stage III/IV)	High stage-Low stage
BC_S43	GPL14951	GSE48276	GSM1173902	Bladder cancer	Bladder cancer	Low stage(Stage I/II)	High stage-Low stage
BC_S43	GPL14951	GSE48276	GSM1173903	Bladder cancer	Bladder cancer	High stage(Stage III/IV)	High stage-Low stage
BC_S43	GPL14951	GSE48276	GSM1173904	Bladder cancer	Bladder cancer	Low stage(Stage I/II)	High stage-Low stage
BC_S43	GPL14951	GSE48276	GSM1173905	Bladder cancer	Bladder cancer	Low stage(Stage I/II)	High stage-Low stage
BC_S43	GPL14951	GSE48276	GSM1173906	Bladder cancer	Bladder cancer	Low stage(Stage I/II)	High stage-Low stage
BC_S43	GPL14951	GSE48276	GSM1173907	Bladder cancer	Bladder cancer	Low stage(Stage I/II)	High stage-Low stage
BC_S43	GPL14951	GSE48276	GSM1173908	Bladder cancer	Bladder cancer	High stage(Stage III/IV)	High stage-Low stage
BC_S43	GPL14951	GSE48276	GSM1173909	Bladder cancer	Bladder cancer	Low stage(Stage I/II)	High stage-Low stage
BC_S43	GPL14951	GSE48276	GSM1173910	Bladder cancer	Bladder cancer	Low stage(Stage I/II)	High stage-Low stage
BC_S43	GPL14951	GSE48276	GSM1173911	Bladder cancer	Bladder cancer	High stage(Stage III/IV)	High stage-Low stage
BC_S43	GPL14951	GSE48276	GSM1173912	Bladder cancer	Bladder cancer	High stage(Stage III/IV)	High stage-Low stage
BC_S43	GPL14951	GSE48276	GSM1173913	Bladder cancer	Bladder cancer	Low stage(Stage I/II)	High stage-Low stage
BC_S43	GPL14951	GSE48276	GSM1173914	Bladder cancer	Bladder cancer	Low stage(Stage I/II)	High stage-Low stage
BC_S43	GPL14951	GSE48276	GSM1173915	Bladder cancer	Bladder cancer	Low stage(Stage I/II)	High stage-Low stage
BC_S43	GPL14951	GSE48276	GSM1173916	Bladder cancer	Bladder cancer	Low stage(Stage I/II)	High stage-Low stage
BC_S43	GPL14951	GSE48276	GSM1173917	Bladder cancer	Bladder cancer	Low stage(Stage I/II)	High stage-Low stage
BC_S43	GPL14951	GSE48276	GSM1173918	Bladder cancer	Bladder cancer	Low stage(Stage I/II)	High stage-Low stage
BC_S43	GPL14951	GSE48276	GSM1173919	Bladder cancer	Bladder cancer	Low stage(Stage I/II)	High stage-Low stage
BC_S43	GPL14951	GSE48276	GSM1173920	Bladder cancer	Bladder cancer	Low stage(Stage I/II)	High stage-Low stage
BC_S43	GPL14951	GSE48276	GSM1173921	Bladder cancer	Bladder cancer	Low stage(Stage I/II)	High stage-Low stage
BC_S43	GPL14951	GSE48276	GSM1173922	Bladder cancer	Bladder cancer	Low stage(Stage I/II)	High stage-Low stage
BC_S43	GPL14951	GSE48276	GSM1173923	Bladder cancer	Bladder cancer	Low stage(Stage I/II)	High stage-Low stage
BC_S43	GPL14951	GSE48276	GSM1173924	Bladder cancer	Bladder cancer	Low stage(Stage I/II)	High stage-Low stage
BC_S43	GPL14951	GSE48276	GSM1173925	Bladder cancer	Bladder cancer	Low stage(Stage I/II)	High stage-Low stage
BC_S43	GPL14951	GSE48276	GSM1173926	Bladder cancer	Bladder cancer	Low stage(Stage I/II)	High stage-Low stage
BC_S43	GPL14951	GSE48276	GSM1173927	Bladder cancer	Bladder cancer	Low stage(Stage I/II)	High stage-Low stage
BC_S43	GPL14951	GSE48276	GSM1173928	Bladder cancer	Bladder cancer	Low stage(Stage I/II)	High stage-Low stage
BC_S43	GPL14951	GSE48276	GSM1173929	Bladder cancer	Bladder cancer	High stage(Stage III/IV)	High stage-Low stage
BC_S43	GPL14951	GSE48276	GSM1173930	Bladder cancer	Bladder cancer	Low stage(Stage I/II)	High stage-Low stage
BC_S43	GPL14951	GSE48276	GSM1173931	Bladder cancer	Bladder cancer	Low stage(Stage I/II)	High stage-Low stage
BC_S43	GPL14951	GSE48276	GSM1173932	Bladder cancer	Bladder cancer	Low stage(Stage I/II)	High stage-Low stage
BC_S43	GPL14951	GSE48276	GSM1173933	Bladder cancer	Bladder cancer	Low stage(Stage I/II)	High stage-Low stage
BC_S43	GPL14951	GSE48276	GSM1173934	Bladder cancer	Bladder cancer	Low stage(Stage I/II)	High stage-Low stage
BC_S43	GPL14951	GSE48276	GSM1173935	Bladder cancer	Bladder cancer	Low stage(Stage I/II)	High stage-Low stage
BC_S43	GPL14951	GSE48276	GSM1173936	Bladder cancer	Bladder cancer	Low stage(Stage I/II)	High stage-Low stage
BC_S43	GPL14951	GSE48276	GSM1173937	Bladder cancer	Bladder cancer	Low stage(Stage I/II)	High stage-Low stage
BC_S43	GPL14951	GSE48276	GSM1173938	Bladder cancer	Bladder cancer	Low stage(Stage I/II)	High stage-Low stage
BC_S43	GPL14951	GSE48276	GSM1173939	Bladder cancer	Bladder cancer	Low stage(Stage I/II)	High stage-Low stage
BC_S43	GPL14951	GSE48276	GSM1173940	Bladder cancer	Bladder cancer	Low stage(Stage I/II)	High stage-Low stage
BC_S43	GPL14951	GSE48276	GSM1173941	Bladder cancer	Bladder cancer	Low stage(Stage I/II)	High stage-Low stage
BC_S43	GPL14951	GSE48276	GSM1173943	Bladder cancer	Bladder cancer	Low stage(Stage I/II)	High stage-Low stage
BC_S43	GPL14951	GSE48276	GSM1173944	Bladder cancer	Bladder cancer	Low stage(Stage I/II)	High stage-Low stage
BC_S43	GPL14951	GSE48276	GSM1173945	Bladder cancer	Bladder cancer	High stage(Stage III/IV)	High stage-Low stage
BC_S43	GPL14951	GSE48276	GSM1173946	Bladder cancer	Bladder cancer	Low stage(Stage I/II)	High stage-Low stage
BC_S43	GPL14951	GSE48276	GSM1173947	Bladder cancer	Bladder cancer	Low stage(Stage I/II)	High stage-Low stage
BC_S43	GPL14951	GSE48276	GSM1173948	Bladder cancer	Bladder cancer	Low stage(Stage I/II)	High stage-Low stage
BC_S43	GPL14951	GSE48276	GSM1173949	Bladder cancer	Bladder cancer	Low stage(Stage I/II)	High stage-Low stage
BC_S43	GPL14951	GSE48276	GSM1173950	Bladder cancer	Bladder cancer	Low stage(Stage I/II)	High stage-Low stage
BC_S43	GPL14951	GSE48276	GSM1173951	Bladder cancer	Bladder cancer	Low stage(Stage I/II)	High stage-Low stage
BC_S43	GPL14951	GSE48276	GSM1173952	Bladder cancer	Bladder cancer	Low stage(Stage I/II)	High stage-Low stage
BC_S43	GPL14951	GSE48276	GSM1173953	Bladder cancer	Bladder cancer	Low stage(Stage I/II)	High stage-Low stage
BC_S43	GPL14951	GSE48276	GSM1173955	Bladder cancer	Bladder cancer	Low stage(Stage I/II)	High stage-Low stage
BC_S43	GPL14951	GSE48276	GSM1173956	Bladder cancer	Bladder cancer	Low stage(Stage I/II)	High stage-Low stage
BC_S43	GPL14951	GSE48276	GSM1173957	Bladder cancer	Bladder cancer	Low stage(Stage I/II)	High stage-Low stage
BC_S43	GPL14951	GSE48276	GSM1173968	Bladder cancer	Bladder cancer	Low stage(Stage I/II)	High stage-Low stage
BC_S43	GPL14951	GSE48276	GSM1173969	Bladder cancer	Bladder cancer	Low stage(Stage I/II)	High stage-Low stage
BC_S43	GPL14951	GSE48276	GSM1173970	Bladder cancer	Bladder cancer	High stage(Stage III/IV)	High stage-Low stage
BC_S43	GPL14951	GSE48276	GSM1173971	Bladder cancer	Bladder cancer	High stage(Stage III/IV)	High stage-Low stage
BC_S43	GPL14951	GSE48276	GSM1173972	Bladder cancer	Bladder cancer	Low stage(Stage I/II)	High stage-Low stage
BC_S43	GPL14951	GSE48276	GSM1173973	Bladder cancer	Bladder cancer	Low stage(Stage I/II)	High stage-Low stage
BC_S43	GPL14951	GSE48276	GSM1173974	Bladder cancer	Bladder cancer	High stage(Stage III/IV)	High stage-Low stage
BC_S43	GPL14951	GSE48276	GSM1173975	Bladder cancer	Bladder cancer	High stage(Stage III/IV)	High stage-Low stage
BC_S43	GPL14951	GSE48276	GSM1173976	Bladder cancer	Bladder cancer	Low stage(Stage I/II)	High stage-Low stage
BC_S43	GPL14951	GSE48276	GSM1173977	Bladder cancer	Bladder cancer	High stage(Stage III/IV)	High stage-Low stage
BC_S43	GPL14951	GSE48276	GSM1173978	Bladder cancer	Bladder cancer	Low stage(Stage I/II)	High stage-Low stage
BC_S43	GPL14951	GSE48276	GSM1173979	Bladder cancer	Bladder cancer	High stage(Stage III/IV)	High stage-Low stage
BC_S43	GPL14951	GSE48276	GSM1173980	Bladder cancer	Bladder cancer	Low stage(Stage I/II)	High stage-Low stage
BC_S43	GPL14951	GSE48276	GSM1173981	Bladder cancer	Bladder cancer	High stage(Stage III/IV)	High stage-Low stage
BC_S43	GPL14951	GSE48276	GSM1173982	Bladder cancer	Bladder cancer	High stage(Stage III/IV)	High stage-Low stage
BC_S43	GPL14951	GSE48276	GSM1173983	Bladder cancer	Bladder cancer	High stage(Stage III/IV)	High stage-Low stage
BC_S43	GPL14951	GSE48276	GSM1173986	Bladder cancer	Bladder cancer	High stage(Stage III/IV)	High stage-Low stage
BC_S43	GPL14951	GSE48276	GSM1173987	Bladder cancer	Bladder cancer	Low stage(Stage I/II)	High stage-Low stage
BC_S43	GPL14951	GSE48276	GSM1173988	Bladder cancer	Bladder cancer	Low stage(Stage I/II)	High stage-Low stage
BC_S43	GPL14951	GSE48276	GSM1173989	Bladder cancer	Bladder cancer	High stage(Stage III/IV)	High stage-Low stage
BC_S43	GPL14951	GSE48276	GSM1173990	Bladder cancer	Bladder cancer	High stage(Stage III/IV)	High stage-Low stage
BC_S43	GPL14951	GSE48276	GSM1173991	Bladder cancer	Bladder cancer	High stage(Stage III/IV)	High stage-Low stage
BC_S43	GPL14951	GSE48276	GSM1173992	Bladder cancer	Bladder cancer	High stage(Stage III/IV)	High stage-Low stage
BC_S43	GPL14951	GSE48276	GSM1173993	Bladder cancer	Bladder cancer	Low stage(Stage I/II)	High stage-Low stage
BC_S43	GPL14951	GSE48276	GSM1173994	Bladder cancer	Bladder cancer	High stage(Stage III/IV)	High stage-Low stage
BC_S43	GPL14951	GSE48276	GSM1173995	Bladder cancer	Bladder cancer	Low stage(Stage I/II)	High stage-Low stage
BC_S43	GPL14951	GSE48276	GSM1173996	Bladder cancer	Bladder cancer	Low stage(Stage I/II)	High stage-Low stage
BC_S43	GPL14951	GSE48276	GSM1173997	Bladder cancer	Bladder cancer	High stage(Stage III/IV)	High stage-Low stage
BC_S43	GPL14951	GSE48276	GSM1173998	Bladder cancer	Bladder cancer	Low stage(Stage I/II)	High stage-Low stage
BC_S43	GPL14951	GSE48276	GSM1173999	Bladder cancer	Bladder cancer	High stage(Stage III/IV)	High stage-Low stage
BC_S43	GPL14951	GSE48276	GSM1174000	Bladder cancer	Bladder cancer	Low stage(Stage I/II)	High stage-Low stage
BC_S43	GPL14951	GSE48276	GSM1174001	Bladder cancer	Bladder cancer	High stage(Stage III/IV)	High stage-Low stage
BC_S43	GPL14951	GSE48276	GSM1174002	Bladder cancer	Bladder cancer	Low stage(Stage I/II)	High stage-Low stage
BC_S43	GPL14951	GSE48276	GSM1174003	Bladder cancer	Bladder cancer	High stage(Stage III/IV)	High stage-Low stage
BC_S43	GPL14951	GSE48276	GSM1174004	Bladder cancer	Bladder cancer	High stage(Stage III/IV)	High stage-Low stage
BC_S43	GPL14951	GSE48276	GSM1174005	Bladder cancer	Bladder cancer	High stage(Stage III/IV)	High stage-Low stage
BC_S43	GPL14951	GSE48276	GSM1174006	Bladder cancer	Bladder cancer	High stage(Stage III/IV)	High stage-Low stage
BC_S43	GPL14951	GSE48276	GSM1174007	Bladder cancer	Bladder cancer	High stage(Stage III/IV)	High stage-Low stage
BC_S43	GPL14951	GSE48276	GSM1174008	Bladder cancer	Bladder cancer	High stage(Stage III/IV)	High stage-Low stage
BC_S43	GPL14951	GSE48276	GSM1174009	Bladder cancer	Bladder cancer	High stage(Stage III/IV)	High stage-Low stage
BC_S43	GPL14951	GSE48276	GSM1174010	Bladder cancer	Bladder cancer	Low stage(Stage I/II)	High stage-Low stage
BC_S43	GPL14951	GSE48276	GSM1174011	Bladder cancer	Bladder cancer	High stage(Stage III/IV)	High stage-Low stage
BC_S43	GPL14951	GSE48276	GSM1174012	Bladder cancer	Bladder cancer	Low stage(Stage I/II)	High stage-Low stage
BC_S43	GPL14951	GSE48276	GSM1174013	Bladder cancer	Bladder cancer	Low stage(Stage I/II)	High stage-Low stage
BC_S43	GPL14951	GSE48276	GSM1174014	Bladder cancer	Bladder cancer	Low stage(Stage I/II)	High stage-Low stage
BC_S43	GPL14951	GSE48276	GSM1174015	Bladder cancer	Bladder cancer	Low stage(Stage I/II)	High stage-Low stage
BC_S43	GPL14951	GSE48276	GSM1174016	Bladder cancer	Bladder cancer	Low stage(Stage I/II)	High stage-Low stage
BC_S43	GPL14951	GSE48276	GSM1174017	Bladder cancer	Bladder cancer	High stage(Stage III/IV)	High stage-Low stage
BC_S43	GPL14951	GSE48276	GSM1174018	Bladder cancer	Bladder cancer	High stage(Stage III/IV)	High stage-Low stage
BC_S43	GPL14951	GSE48276	GSM1174019	Bladder cancer	Bladder cancer	High stage(Stage III/IV)	High stage-Low stage
BC_S43	GPL14951	GSE48276	GSM1174020	Bladder cancer	Bladder cancer	High stage(Stage III/IV)	High stage-Low stage
BC_S43	GPL14951	GSE48276	GSM1174021	Bladder cancer	Bladder cancer	High stage(Stage III/IV)	High stage-Low stage
BC_S43	GPL14951	GSE48276	GSM1174022	Bladder cancer	Bladder cancer	Low stage(Stage I/II)	High stage-Low stage
BC_S43	GPL14951	GSE48276	GSM1174023	Bladder cancer	Bladder cancer	High stage(Stage III/IV)	High stage-Low stage
BC_S43	GPL14951	GSE48276	GSM1174024	Bladder cancer	Bladder cancer	Low stage(Stage I/II)	High stage-Low stage
BC_S43	GPL14951	GSE48276	GSM1174025	Bladder cancer	Bladder cancer	High stage(Stage III/IV)	High stage-Low stage
BC_S43	GPL14951	GSE48276	GSM1174026	Bladder cancer	Bladder cancer	High stage(Stage III/IV)	High stage-Low stage
BC_S43	GPL14951	GSE48276	GSM1174027	Bladder cancer	Bladder cancer	High stage(Stage III/IV)	High stage-Low stage
BC_S43	GPL14951	GSE48276	GSM1174028	Bladder cancer	Bladder cancer	Low stage(Stage I/II)	High stage-Low stage
BC_S44	GPL14951	GSE52329	GSM1263201	Bladder cancer	Bladder cancer	High stage(Stage III/IV)	High stage-Low stage
BC_S44	GPL14951	GSE52329	GSM1263202	Bladder cancer	Bladder cancer	High stage(Stage III/IV)	High stage-Low stage
BC_S44	GPL14951	GSE52329	GSM1263203	Bladder cancer	Bladder cancer	High stage(Stage III/IV)	High stage-Low stage
BC_S44	GPL14951	GSE52329	GSM1263204	Bladder cancer	Bladder cancer	Low stage(Stage I/II)	High stage-Low stage
BC_S44	GPL14951	GSE52329	GSM1263205	Bladder cancer	Bladder cancer	High stage(Stage III/IV)	High stage-Low stage
BC_S44	GPL14951	GSE52329	GSM1263206	Bladder cancer	Bladder cancer	Low stage(Stage I/II)	High stage-Low stage
BC_S44	GPL14951	GSE52329	GSM1263207	Bladder cancer	Bladder cancer	High stage(Stage III/IV)	High stage-Low stage
BC_S44	GPL14951	GSE52329	GSM1263208	Bladder cancer	Bladder cancer	High stage(Stage III/IV)	High stage-Low stage
BC_S44	GPL14951	GSE52329	GSM1263209	Bladder cancer	Bladder cancer	Low stage(Stage I/II)	High stage-Low stage
BC_S44	GPL14951	GSE52329	GSM1263210	Bladder cancer	Bladder cancer	High stage(Stage III/IV)	High stage-Low stage
BC_S44	GPL14951	GSE52329	GSM1263211	Bladder cancer	Bladder cancer	Low stage(Stage I/II)	High stage-Low stage
BC_S44	GPL14951	GSE52329	GSM1263212	Bladder cancer	Bladder cancer	High stage(Stage III/IV)	High stage-Low stage
BC_S44	GPL14951	GSE52329	GSM1263213	Bladder cancer	Bladder cancer	High stage(Stage III/IV)	High stage-Low stage
BC_S44	GPL14951	GSE52329	GSM1263214	Bladder cancer	Bladder cancer	High stage(Stage III/IV)	High stage-Low stage
BC_S44	GPL14951	GSE52329	GSM1263215	Bladder cancer	Bladder cancer	High stage(Stage III/IV)	High stage-Low stage
BC_S44	GPL14951	GSE52329	GSM1263216	Bladder cancer	Bladder cancer	High stage(Stage III/IV)	High stage-Low stage
BC_S44	GPL14951	GSE52329	GSM1263217	Bladder cancer	Bladder cancer	High stage(Stage III/IV)	High stage-Low stage
BC_S44	GPL14951	GSE52329	GSM1263218	Bladder cancer	Bladder cancer	Low stage(Stage I/II)	High stage-Low stage
BC_S44	GPL14951	GSE52329	GSM1263219	Bladder cancer	Bladder cancer	Low stage(Stage I/II)	High stage-Low stage
BC_S44	GPL14951	GSE52329	GSM1263220	Bladder cancer	Bladder cancer	High stage(Stage III/IV)	High stage-Low stage
BC_S45	GPL6947	GSE48075	GSM1167333	Bladder cancer	Bladder cancer	Low stage(Stage I/II)	High stage-Low stage
BC_S45	GPL6947	GSE48075	GSM1167334	Bladder cancer	Bladder cancer	Low stage(Stage I/II)	High stage-Low stage
BC_S45	GPL6947	GSE48075	GSM1167335	Bladder cancer	Bladder cancer	High stage(Stage III/IV)	High stage-Low stage
BC_S45	GPL6947	GSE48075	GSM1167336	Bladder cancer	Bladder cancer	High stage(Stage III/IV)	High stage-Low stage
BC_S45	GPL6947	GSE48075	GSM1167338	Bladder cancer	Bladder cancer	Low stage(Stage I/II)	High stage-Low stage
BC_S45	GPL6947	GSE48075	GSM1167339	Bladder cancer	Bladder cancer	High stage(Stage III/IV)	High stage-Low stage
BC_S45	GPL6947	GSE48075	GSM1167340	Bladder cancer	Bladder cancer	Low stage(Stage I/II)	High stage-Low stage
BC_S45	GPL6947	GSE48075	GSM1167341	Bladder cancer	Bladder cancer	Low stage(Stage I/II)	High stage-Low stage
BC_S45	GPL6947	GSE48075	GSM1167342	Bladder cancer	Bladder cancer	High stage(Stage III/IV)	High stage-Low stage
BC_S45	GPL6947	GSE48075	GSM1167343	Bladder cancer	Bladder cancer	Low stage(Stage I/II)	High stage-Low stage
BC_S45	GPL6947	GSE48075	GSM1167344	Bladder cancer	Bladder cancer	Low stage(Stage I/II)	High stage-Low stage
BC_S45	GPL6947	GSE48075	GSM1167345	Bladder cancer	Bladder cancer	Low stage(Stage I/II)	High stage-Low stage
BC_S45	GPL6947	GSE48075	GSM1167346	Bladder cancer	Bladder cancer	Low stage(Stage I/II)	High stage-Low stage
BC_S45	GPL6947	GSE48075	GSM1167347	Bladder cancer	Bladder cancer	High stage(Stage III/IV)	High stage-Low stage
BC_S45	GPL6947	GSE48075	GSM1167348	Bladder cancer	Bladder cancer	Low stage(Stage I/II)	High stage-Low stage
BC_S45	GPL6947	GSE48075	GSM1167349	Bladder cancer	Bladder cancer	Low stage(Stage I/II)	High stage-Low stage
BC_S45	GPL6947	GSE48075	GSM1167350	Bladder cancer	Bladder cancer	Low stage(Stage I/II)	High stage-Low stage
BC_S45	GPL6947	GSE48075	GSM1167354	Bladder cancer	Bladder cancer	Low stage(Stage I/II)	High stage-Low stage
BC_S45	GPL6947	GSE48075	GSM1167360	Bladder cancer	Bladder cancer	High stage(Stage III/IV)	High stage-Low stage
BC_S45	GPL6947	GSE48075	GSM1167361	Bladder cancer	Bladder cancer	High stage(Stage III/IV)	High stage-Low stage
BC_S45	GPL6947	GSE48075	GSM1167363	Bladder cancer	Bladder cancer	High stage(Stage III/IV)	High stage-Low stage
BC_S45	GPL6947	GSE48075	GSM1167366	Bladder cancer	Bladder cancer	Low stage(Stage I/II)	High stage-Low stage
BC_S45	GPL6947	GSE48075	GSM1167372	Bladder cancer	Bladder cancer	Low stage(Stage I/II)	High stage-Low stage
BC_S45	GPL6947	GSE48075	GSM1167373	Bladder cancer	Bladder cancer	Low stage(Stage I/II)	High stage-Low stage
BC_S45	GPL6947	GSE48075	GSM1167374	Bladder cancer	Bladder cancer	Low stage(Stage I/II)	High stage-Low stage
BC_S45	GPL6947	GSE48075	GSM1167375	Bladder cancer	Bladder cancer	Low stage(Stage I/II)	High stage-Low stage
BC_S45	GPL6947	GSE48075	GSM1167376	Bladder cancer	Bladder cancer	High stage(Stage III/IV)	High stage-Low stage
BC_S45	GPL6947	GSE48075	GSM1167377	Bladder cancer	Bladder cancer	High stage(Stage III/IV)	High stage-Low stage
BC_S45	GPL6947	GSE48075	GSM1167378	Bladder cancer	Bladder cancer	Low stage(Stage I/II)	High stage-Low stage
BC_S45	GPL6947	GSE48075	GSM1167379	Bladder cancer	Bladder cancer	High stage(Stage III/IV)	High stage-Low stage
BC_S45	GPL6947	GSE48075	GSM1167380	Bladder cancer	Bladder cancer	High stage(Stage III/IV)	High stage-Low stage
BC_S45	GPL6947	GSE48075	GSM1167381	Bladder cancer	Bladder cancer	Low stage(Stage I/II)	High stage-Low stage
BC_S45	GPL6947	GSE48075	GSM1167382	Bladder cancer	Bladder cancer	Low stage(Stage I/II)	High stage-Low stage
BC_S45	GPL6947	GSE48075	GSM1167383	Bladder cancer	Bladder cancer	Low stage(Stage I/II)	High stage-Low stage
BC_S45	GPL6947	GSE48075	GSM1167384	Bladder cancer	Bladder cancer	High stage(Stage III/IV)	High stage-Low stage
BC_S45	GPL6947	GSE48075	GSM1167385	Bladder cancer	Bladder cancer	High stage(Stage III/IV)	High stage-Low stage
BC_S45	GPL6947	GSE48075	GSM1167386	Bladder cancer	Bladder cancer	Low stage(Stage I/II)	High stage-Low stage
BC_S45	GPL6947	GSE48075	GSM1167387	Bladder cancer	Bladder cancer	Low stage(Stage I/II)	High stage-Low stage
BC_S45	GPL6947	GSE48075	GSM1167388	Bladder cancer	Bladder cancer	High stage(Stage III/IV)	High stage-Low stage
BC_S45	GPL6947	GSE48075	GSM1167389	Bladder cancer	Bladder cancer	High stage(Stage III/IV)	High stage-Low stage
BC_S45	GPL6947	GSE48075	GSM1167390	Bladder cancer	Bladder cancer	High stage(Stage III/IV)	High stage-Low stage
BC_S45	GPL6947	GSE48075	GSM1167391	Bladder cancer	Bladder cancer	Low stage(Stage I/II)	High stage-Low stage
BC_S45	GPL6947	GSE48075	GSM1167392	Bladder cancer	Bladder cancer	Low stage(Stage I/II)	High stage-Low stage
BC_S45	GPL6947	GSE48075	GSM1167393	Bladder cancer	Bladder cancer	High stage(Stage III/IV)	High stage-Low stage
BC_S45	GPL6947	GSE48075	GSM1167394	Bladder cancer	Bladder cancer	Low stage(Stage I/II)	High stage-Low stage
BC_S45	GPL6947	GSE48075	GSM1167395	Bladder cancer	Bladder cancer	Low stage(Stage I/II)	High stage-Low stage
BC_S45	GPL6947	GSE48075	GSM1167396	Bladder cancer	Bladder cancer	High stage(Stage III/IV)	High stage-Low stage
BC_S45	GPL6947	GSE48075	GSM1167397	Bladder cancer	Bladder cancer	Low stage(Stage I/II)	High stage-Low stage
BC_S45	GPL6947	GSE48075	GSM1167398	Bladder cancer	Bladder cancer	Low stage(Stage I/II)	High stage-Low stage
BC_S45	GPL6947	GSE48075	GSM1167399	Bladder cancer	Bladder cancer	Low stage(Stage I/II)	High stage-Low stage
BC_S45	GPL6947	GSE48075	GSM1167400	Bladder cancer	Bladder cancer	Low stage(Stage I/II)	High stage-Low stage
BC_S45	GPL6947	GSE48075	GSM1167401	Bladder cancer	Bladder cancer	Low stage(Stage I/II)	High stage-Low stage
BC_S45	GPL6947	GSE48075	GSM1167402	Bladder cancer	Bladder cancer	High stage(Stage III/IV)	High stage-Low stage
BC_S45	GPL6947	GSE48075	GSM1167403	Bladder cancer	Bladder cancer	Low stage(Stage I/II)	High stage-Low stage
BC_S45	GPL6947	GSE48075	GSM1167404	Bladder cancer	Bladder cancer	High stage(Stage III/IV)	High stage-Low stage
BC_S45	GPL6947	GSE48075	GSM1167406	Bladder cancer	Bladder cancer	High stage(Stage III/IV)	High stage-Low stage
BC_S45	GPL6947	GSE48075	GSM1167407	Bladder cancer	Bladder cancer	Low stage(Stage I/II)	High stage-Low stage
BC_S45	GPL6947	GSE48075	GSM1167410	Bladder cancer	Bladder cancer	Low stage(Stage I/II)	High stage-Low stage
BC_S45	GPL6947	GSE48075	GSM1167414	Bladder cancer	Bladder cancer	Low stage(Stage I/II)	High stage-Low stage
BC_S45	GPL6947	GSE48075	GSM1167415	Bladder cancer	Bladder cancer	Low stage(Stage I/II)	High stage-Low stage
BC_S45	GPL6947	GSE48075	GSM1167416	Bladder cancer	Bladder cancer	High stage(Stage III/IV)	High stage-Low stage
BC_S45	GPL6947	GSE48075	GSM1167417	Bladder cancer	Bladder cancer	Low stage(Stage I/II)	High stage-Low stage
BC_S45	GPL6947	GSE48075	GSM1167418	Bladder cancer	Bladder cancer	Low stage(Stage I/II)	High stage-Low stage
BC_S45	GPL6947	GSE48075	GSM1167419	Bladder cancer	Bladder cancer	Low stage(Stage I/II)	High stage-Low stage
BC_S45	GPL6947	GSE48075	GSM1167420	Bladder cancer	Bladder cancer	Low stage(Stage I/II)	High stage-Low stage
BC_S45	GPL6947	GSE48075	GSM1167421	Bladder cancer	Bladder cancer	Low stage(Stage I/II)	High stage-Low stage
BC_S45	GPL6947	GSE48075	GSM1167422	Bladder cancer	Bladder cancer	Low stage(Stage I/II)	High stage-Low stage
BC_S45	GPL6947	GSE48075	GSM1167424	Bladder cancer	Bladder cancer	Low stage(Stage I/II)	High stage-Low stage
BC_S45	GPL6947	GSE48075	GSM1167425	Bladder cancer	Bladder cancer	Low stage(Stage I/II)	High stage-Low stage
BC_S45	GPL6947	GSE48075	GSM1167426	Bladder cancer	Bladder cancer	Low stage(Stage I/II)	High stage-Low stage
BC_S45	GPL6947	GSE48075	GSM1167427	Bladder cancer	Bladder cancer	Low stage(Stage I/II)	High stage-Low stage
BC_S45	GPL6947	GSE48075	GSM1167428	Bladder cancer	Bladder cancer	Low stage(Stage I/II)	High stage-Low stage
BC_S45	GPL6947	GSE48075	GSM1167429	Bladder cancer	Bladder cancer	High stage(Stage III/IV)	High stage-Low stage
BC_S45	GPL6947	GSE48075	GSM1167431	Bladder cancer	Bladder cancer	Low stage(Stage I/II)	High stage-Low stage
BC_S45	GPL6947	GSE48075	GSM1167433	Bladder cancer	Bladder cancer	High stage(Stage III/IV)	High stage-Low stage
BC_S45	GPL6947	GSE48075	GSM1167434	Bladder cancer	Bladder cancer	Low stage(Stage I/II)	High stage-Low stage
BC_S45	GPL6947	GSE48075	GSM1167435	Bladder cancer	Bladder cancer	High stage(Stage III/IV)	High stage-Low stage
BC_S45	GPL6947	GSE48075	GSM1167436	Bladder cancer	Bladder cancer	Low stage(Stage I/II)	High stage-Low stage
BC_S45	GPL6947	GSE48075	GSM1167437	Bladder cancer	Bladder cancer	Low stage(Stage I/II)	High stage-Low stage
BC_S45	GPL6947	GSE48075	GSM1167438	Bladder cancer	Bladder cancer	Low stage(Stage I/II)	High stage-Low stage
BC_S45	GPL6947	GSE48075	GSM1167439	Bladder cancer	Bladder cancer	Low stage(Stage I/II)	High stage-Low stage
BC_S45	GPL6947	GSE48075	GSM1167440	Bladder cancer	Bladder cancer	Low stage(Stage I/II)	High stage-Low stage
BC_S45	GPL6947	GSE48075	GSM1167441	Bladder cancer	Bladder cancer	High stage(Stage III/IV)	High stage-Low stage
BC_S45	GPL6947	GSE48075	GSM1167443	Bladder cancer	Bladder cancer	Low stage(Stage I/II)	High stage-Low stage
BC_S45	GPL6947	GSE48075	GSM1167444	Bladder cancer	Bladder cancer	Low stage(Stage I/II)	High stage-Low stage
BC_S45	GPL6947	GSE48075	GSM1167445	Bladder cancer	Bladder cancer	Low stage(Stage I/II)	High stage-Low stage
BC_S45	GPL6947	GSE48075	GSM1167449	Bladder cancer	Bladder cancer	High stage(Stage III/IV)	High stage-Low stage
BC_S45	GPL6947	GSE48075	GSM1167451	Bladder cancer	Bladder cancer	Low stage(Stage I/II)	High stage-Low stage
BC_S45	GPL6947	GSE48075	GSM1167453	Bladder cancer	Bladder cancer	High stage(Stage III/IV)	High stage-Low stage
BC_S45	GPL6947	GSE48075	GSM1167454	Bladder cancer	Bladder cancer	Low stage(Stage I/II)	High stage-Low stage
BC_S45	GPL6947	GSE48075	GSM1167455	Bladder cancer	Bladder cancer	Low stage(Stage I/II)	High stage-Low stage
BC_S45	GPL6947	GSE48075	GSM1167457	Bladder cancer	Bladder cancer	High stage(Stage III/IV)	High stage-Low stage
BC_S45	GPL6947	GSE48075	GSM1167458	Bladder cancer	Bladder cancer	Low stage(Stage I/II)	High stage-Low stage
BC_S45	GPL6947	GSE48075	GSM1167459	Bladder cancer	Bladder cancer	Low stage(Stage I/II)	High stage-Low stage
BC_S45	GPL6947	GSE48075	GSM1167460	Bladder cancer	Bladder cancer	Low stage(Stage I/II)	High stage-Low stage
BC_S45	GPL6947	GSE48075	GSM1167461	Bladder cancer	Bladder cancer	High stage(Stage III/IV)	High stage-Low stage
BC_S45	GPL6947	GSE48075	GSM1167462	Bladder cancer	Bladder cancer	Low stage(Stage I/II)	High stage-Low stage
BC_S45	GPL6947	GSE48075	GSM1167464	Bladder cancer	Bladder cancer	Low stage(Stage I/II)	High stage-Low stage
BC_S45	GPL6947	GSE48075	GSM1167466	Bladder cancer	Bladder cancer	Low stage(Stage I/II)	High stage-Low stage
BC_S45	GPL6947	GSE48075	GSM1167467	Bladder cancer	Bladder cancer	Low stage(Stage I/II)	High stage-Low stage
BC_S45	GPL6947	GSE48075	GSM1167468	Bladder cancer	Bladder cancer	Low stage(Stage I/II)	High stage-Low stage
BC_S45	GPL6947	GSE48075	GSM1167469	Bladder cancer	Bladder cancer	Low stage(Stage I/II)	High stage-Low stage
BC_S45	GPL6947	GSE48075	GSM1167470	Bladder cancer	Bladder cancer	Low stage(Stage I/II)	High stage-Low stage
BC_S45	GPL6947	GSE48075	GSM1167473	Bladder cancer	Bladder cancer	Low stage(Stage I/II)	High stage-Low stage
BC_S45	GPL6947	GSE48075	GSM1167474	Bladder cancer	Bladder cancer	Low stage(Stage I/II)	High stage-Low stage
BC_S46	GPL14951	GSE52219	GSM1261392	Bladder cancer	Muscle-invasive bladder cancer	Low stage(Stage I/II)	High stage-Low stage
BC_S46	GPL14951	GSE52219	GSM1261393	Bladder cancer	Muscle-invasive bladder cancer	Low stage(Stage I/II)	High stage-Low stage
BC_S46	GPL14951	GSE52219	GSM1261394	Bladder cancer	Muscle-invasive bladder cancer	High stage(Stage III/IV)	High stage-Low stage
BC_S46	GPL14951	GSE52219	GSM1261395	Bladder cancer	Muscle-invasive bladder cancer	Low stage(Stage I/II)	High stage-Low stage
BC_S46	GPL14951	GSE52219	GSM1261396	Bladder cancer	Muscle-invasive bladder cancer	Low stage(Stage I/II)	High stage-Low stage
BC_S46	GPL14951	GSE52219	GSM1261397	Bladder cancer	Muscle-invasive bladder cancer	High stage(Stage III/IV)	High stage-Low stage
BC_S46	GPL14951	GSE52219	GSM1261398	Bladder cancer	Muscle-invasive bladder cancer	Low stage(Stage I/II)	High stage-Low stage
BC_S46	GPL14951	GSE52219	GSM1261399	Bladder cancer	Muscle-invasive bladder cancer	Low stage(Stage I/II)	High stage-Low stage
BC_S46	GPL14951	GSE52219	GSM1261400	Bladder cancer	Muscle-invasive bladder cancer	Low stage(Stage I/II)	High stage-Low stage
BC_S46	GPL14951	GSE52219	GSM1261401	Bladder cancer	Muscle-invasive bladder cancer	High stage(Stage III/IV)	High stage-Low stage
BC_S46	GPL14951	GSE52219	GSM1261402	Bladder cancer	Muscle-invasive bladder cancer	Low stage(Stage I/II)	High stage-Low stage
BC_S46	GPL14951	GSE52219	GSM1261403	Bladder cancer	Muscle-invasive bladder cancer	Low stage(Stage I/II)	High stage-Low stage
BC_S46	GPL14951	GSE52219	GSM1261404	Bladder cancer	Muscle-invasive bladder cancer	High stage(Stage III/IV)	High stage-Low stage
BC_S46	GPL14951	GSE52219	GSM1261405	Bladder cancer	Muscle-invasive bladder cancer	High stage(Stage III/IV)	High stage-Low stage
BC_S46	GPL14951	GSE52219	GSM1261406	Bladder cancer	Muscle-invasive bladder cancer	Low stage(Stage I/II)	High stage-Low stage
BC_S46	GPL14951	GSE52219	GSM1261407	Bladder cancer	Muscle-invasive bladder cancer	High stage(Stage III/IV)	High stage-Low stage
BC_S46	GPL14951	GSE52219	GSM1261408	Bladder cancer	Muscle-invasive bladder cancer	Low stage(Stage I/II)	High stage-Low stage
BC_S46	GPL14951	GSE52219	GSM1261409	Bladder cancer	Muscle-invasive bladder cancer	High stage(Stage III/IV)	High stage-Low stage
BC_S46	GPL14951	GSE52219	GSM1261410	Bladder cancer	Muscle-invasive bladder cancer	Low stage(Stage I/II)	High stage-Low stage
BC_S46	GPL14951	GSE52219	GSM1261411	Bladder cancer	Muscle-invasive bladder cancer	Low stage(Stage I/II)	High stage-Low stage
BC_S46	GPL14951	GSE52219	GSM1261412	Bladder cancer	Muscle-invasive bladder cancer	High stage(Stage III/IV)	High stage-Low stage
BC_S46	GPL14951	GSE52219	GSM1261413	Bladder cancer	Muscle-invasive bladder cancer	Low stage(Stage I/II)	High stage-Low stage
BC_S46	GPL14951	GSE52219	GSM1261414	Bladder cancer	Muscle-invasive bladder cancer	Low stage(Stage I/II)	High stage-Low stage
BC_S47	GPL22995	GSE87304	GSM2470228	Bladder cancer	Muscle-invasive bladder cancer	Low stage(Stage I/II)	High stage-Low stage
BC_S47	GPL22995	GSE87304	GSM2470229	Bladder cancer	Muscle-invasive bladder cancer	Low stage(Stage I/II)	High stage-Low stage
BC_S47	GPL22995	GSE87304	GSM2470230	Bladder cancer	Muscle-invasive bladder cancer	Low stage(Stage I/II)	High stage-Low stage
BC_S47	GPL22995	GSE87304	GSM2470231	Bladder cancer	Muscle-invasive bladder cancer	Low stage(Stage I/II)	High stage-Low stage
BC_S47	GPL22995	GSE87304	GSM2470232	Bladder cancer	Muscle-invasive bladder cancer	High stage(Stage III/IV)	High stage-Low stage
BC_S47	GPL22995	GSE87304	GSM2470233	Bladder cancer	Muscle-invasive bladder cancer	High stage(Stage III/IV)	High stage-Low stage
BC_S47	GPL22995	GSE87304	GSM2470237	Bladder cancer	Muscle-invasive bladder cancer	High stage(Stage III/IV)	High stage-Low stage
BC_S47	GPL22995	GSE87304	GSM2470238	Bladder cancer	Muscle-invasive bladder cancer	High stage(Stage III/IV)	High stage-Low stage
BC_S47	GPL22995	GSE87304	GSM2470241	Bladder cancer	Muscle-invasive bladder cancer	High stage(Stage III/IV)	High stage-Low stage
BC_S47	GPL22995	GSE87304	GSM2470242	Bladder cancer	Muscle-invasive bladder cancer	High stage(Stage III/IV)	High stage-Low stage
BC_S47	GPL22995	GSE87304	GSM2470246	Bladder cancer	Muscle-invasive bladder cancer	High stage(Stage III/IV)	High stage-Low stage
BC_S47	GPL22995	GSE87304	GSM2470247	Bladder cancer	Muscle-invasive bladder cancer	High stage(Stage III/IV)	High stage-Low stage
BC_S47	GPL22995	GSE87304	GSM2470248	Bladder cancer	Muscle-invasive bladder cancer	High stage(Stage III/IV)	High stage-Low stage
BC_S47	GPL22995	GSE87304	GSM2470250	Bladder cancer	Muscle-invasive bladder cancer	High stage(Stage III/IV)	High stage-Low stage
BC_S47	GPL22995	GSE87304	GSM2470251	Bladder cancer	Muscle-invasive bladder cancer	Low stage(Stage I/II)	High stage-Low stage
BC_S47	GPL22995	GSE87304	GSM2470252	Bladder cancer	Muscle-invasive bladder cancer	Low stage(Stage I/II)	High stage-Low stage
BC_S47	GPL22995	GSE87304	GSM2470253	Bladder cancer	Muscle-invasive bladder cancer	High stage(Stage III/IV)	High stage-Low stage
BC_S47	GPL22995	GSE87304	GSM2470255	Bladder cancer	Muscle-invasive bladder cancer	Low stage(Stage I/II)	High stage-Low stage
BC_S47	GPL22995	GSE87304	GSM2470256	Bladder cancer	Muscle-invasive bladder cancer	High stage(Stage III/IV)	High stage-Low stage
BC_S47	GPL22995	GSE87304	GSM2470257	Bladder cancer	Muscle-invasive bladder cancer	High stage(Stage III/IV)	High stage-Low stage
BC_S47	GPL22995	GSE87304	GSM2470258	Bladder cancer	Muscle-invasive bladder cancer	Low stage(Stage I/II)	High stage-Low stage
BC_S47	GPL22995	GSE87304	GSM2470259	Bladder cancer	Muscle-invasive bladder cancer	Low stage(Stage I/II)	High stage-Low stage
BC_S47	GPL22995	GSE87304	GSM2470261	Bladder cancer	Muscle-invasive bladder cancer	High stage(Stage III/IV)	High stage-Low stage
BC_S47	GPL22995	GSE87304	GSM2470262	Bladder cancer	Muscle-invasive bladder cancer	High stage(Stage III/IV)	High stage-Low stage
BC_S47	GPL22995	GSE87304	GSM2470264	Bladder cancer	Muscle-invasive bladder cancer	High stage(Stage III/IV)	High stage-Low stage
BC_S47	GPL22995	GSE87304	GSM2470265	Bladder cancer	Muscle-invasive bladder cancer	Low stage(Stage I/II)	High stage-Low stage
BC_S47	GPL22995	GSE87304	GSM2470267	Bladder cancer	Muscle-invasive bladder cancer	High stage(Stage III/IV)	High stage-Low stage
BC_S47	GPL22995	GSE87304	GSM2470268	Bladder cancer	Muscle-invasive bladder cancer	Low stage(Stage I/II)	High stage-Low stage
BC_S47	GPL22995	GSE87304	GSM2470270	Bladder cancer	Muscle-invasive bladder cancer	High stage(Stage III/IV)	High stage-Low stage
BC_S47	GPL22995	GSE87304	GSM2470271	Bladder cancer	Muscle-invasive bladder cancer	High stage(Stage III/IV)	High stage-Low stage
BC_S47	GPL22995	GSE87304	GSM2470273	Bladder cancer	Muscle-invasive bladder cancer	High stage(Stage III/IV)	High stage-Low stage
BC_S47	GPL22995	GSE87304	GSM2470274	Bladder cancer	Muscle-invasive bladder cancer	Low stage(Stage I/II)	High stage-Low stage
BC_S47	GPL22995	GSE87304	GSM2470275	Bladder cancer	Muscle-invasive bladder cancer	High stage(Stage III/IV)	High stage-Low stage
BC_S47	GPL22995	GSE87304	GSM2470276	Bladder cancer	Muscle-invasive bladder cancer	High stage(Stage III/IV)	High stage-Low stage
BC_S47	GPL22995	GSE87304	GSM2470278	Bladder cancer	Muscle-invasive bladder cancer	High stage(Stage III/IV)	High stage-Low stage
BC_S47	GPL22995	GSE87304	GSM2470279	Bladder cancer	Muscle-invasive bladder cancer	Low stage(Stage I/II)	High stage-Low stage
BC_S47	GPL22995	GSE87304	GSM2470282	Bladder cancer	Muscle-invasive bladder cancer	High stage(Stage III/IV)	High stage-Low stage
BC_S47	GPL22995	GSE87304	GSM2470283	Bladder cancer	Muscle-invasive bladder cancer	High stage(Stage III/IV)	High stage-Low stage
BC_S47	GPL22995	GSE87304	GSM2470284	Bladder cancer	Muscle-invasive bladder cancer	Low stage(Stage I/II)	High stage-Low stage
BC_S47	GPL22995	GSE87304	GSM2470286	Bladder cancer	Muscle-invasive bladder cancer	High stage(Stage III/IV)	High stage-Low stage
BC_S47	GPL22995	GSE87304	GSM2470287	Bladder cancer	Muscle-invasive bladder cancer	High stage(Stage III/IV)	High stage-Low stage
BC_S47	GPL22995	GSE87304	GSM2470288	Bladder cancer	Muscle-invasive bladder cancer	Low stage(Stage I/II)	High stage-Low stage
BC_S47	GPL22995	GSE87304	GSM2470289	Bladder cancer	Muscle-invasive bladder cancer	High stage(Stage III/IV)	High stage-Low stage
BC_S47	GPL22995	GSE87304	GSM2470290	Bladder cancer	Muscle-invasive bladder cancer	High stage(Stage III/IV)	High stage-Low stage
BC_S47	GPL22995	GSE87304	GSM2470293	Bladder cancer	Muscle-invasive bladder cancer	High stage(Stage III/IV)	High stage-Low stage
BC_S47	GPL22995	GSE87304	GSM2470294	Bladder cancer	Muscle-invasive bladder cancer	High stage(Stage III/IV)	High stage-Low stage
BC_S47	GPL22995	GSE87304	GSM2470296	Bladder cancer	Muscle-invasive bladder cancer	High stage(Stage III/IV)	High stage-Low stage
BC_S47	GPL22995	GSE87304	GSM2470299	Bladder cancer	Muscle-invasive bladder cancer	Low stage(Stage I/II)	High stage-Low stage
BC_S47	GPL22995	GSE87304	GSM2470300	Bladder cancer	Muscle-invasive bladder cancer	Low stage(Stage I/II)	High stage-Low stage
BC_S47	GPL22995	GSE87304	GSM2470301	Bladder cancer	Muscle-invasive bladder cancer	High stage(Stage III/IV)	High stage-Low stage
BC_S47	GPL22995	GSE87304	GSM2470303	Bladder cancer	Muscle-invasive bladder cancer	Low stage(Stage I/II)	High stage-Low stage
BC_S47	GPL22995	GSE87304	GSM2470304	Bladder cancer	Muscle-invasive bladder cancer	Low stage(Stage I/II)	High stage-Low stage
BC_S47	GPL22995	GSE87304	GSM2470306	Bladder cancer	Muscle-invasive bladder cancer	Low stage(Stage I/II)	High stage-Low stage
BC_S47	GPL22995	GSE87304	GSM2470310	Bladder cancer	Muscle-invasive bladder cancer	Low stage(Stage I/II)	High stage-Low stage
BC_S47	GPL22995	GSE87304	GSM2470311	Bladder cancer	Muscle-invasive bladder cancer	Low stage(Stage I/II)	High stage-Low stage
BC_S47	GPL22995	GSE87304	GSM2470312	Bladder cancer	Muscle-invasive bladder cancer	Low stage(Stage I/II)	High stage-Low stage
BC_S47	GPL22995	GSE87304	GSM2470313	Bladder cancer	Muscle-invasive bladder cancer	High stage(Stage III/IV)	High stage-Low stage
BC_S47	GPL22995	GSE87304	GSM2470314	Bladder cancer	Muscle-invasive bladder cancer	High stage(Stage III/IV)	High stage-Low stage
BC_S47	GPL22995	GSE87304	GSM2470316	Bladder cancer	Muscle-invasive bladder cancer	High stage(Stage III/IV)	High stage-Low stage
BC_S47	GPL22995	GSE87304	GSM2470317	Bladder cancer	Muscle-invasive bladder cancer	High stage(Stage III/IV)	High stage-Low stage
[truncated: 87,364 more rows]
